# Supplementary material for: A porcine ex vivo model of pigmentary glaucoma
Source: Sci Rep. 2018 Apr 3;8:5468. doi: 10.1038/s41598-018-23861-x (PMC5882895; doi:10.1038/s41598-018-23861-x)
Supplement: Supplementary file 3 — Supplemental Table 1 [file 41598_2018_23861_MOESM3_ESM.xls]

## Sheet: Sheet0
© 2000-2017 QIAGEN. All rights reserved.
Expr Fold Change	Expr p-value	ID	Flags	Symbol	Entrez Gene Name	Location	Type(s)	Drug(s)
20.59	0.00395	TCR
20.55	0.00251	KIAA1644		KIAA1644	KIAA1644	Other	other
13.63	0.0367	ART3	D	ART3	ADP-ribosyltransferase 3	Plasma Membrane	enzyme
13.13	0.000704	ART3	D	ART3	ADP-ribosyltransferase 3	Plasma Membrane	enzyme
12.92	0.0124	IGKV; LOC100736718; LOC102167096
12.88	0.00896	SLC13A4		SLC13A4	solute carrier family 13 member 4	Plasma Membrane	transporter
12.85	0.0143	IGHA
10.76	0.00198	NRCAM		NRCAM	neuronal cell adhesion molecule	Plasma Membrane	other
10.51	0.0419	KIAA1324		KIAA1324	KIAA1324	Plasma Membrane	other
10.46	0.0344	LOC102163581
10.03	0.0275	LOC100621559; TCR-B
9.96	0.00758	HOXD3		HOXD3	homeobox D3	Nucleus	transcription regulator
9.87	0.00587	CPB1; LOC102165541
9.77	0.0199	PPP1R7		PPP1R7	protein phosphatase 1 regulatory subunit 7	Nucleus	phosphatase
9.41	0.025	DMBT1		DMBT1	deleted in malignant brain tumors 1	Plasma Membrane	transmembrane receptor
9.37	0.0366	AMER3		AMER3	APC membrane recruitment protein 3	Other	other
9.28	0.0156	DLX2		DLX2	distal-less homeobox 2	Nucleus	transcription regulator
9.23	0.0205	LOC102158029
8.47	0.0208	E4; LOC100737327
8.44	0.026	HOXA1		HOXA1	homeobox A1	Nucleus	transcription regulator
8.26	0.00232	LOC100156854
8.2	0.00603	LOC102157641
7.95	0.000898	MAB21L3		MAB21L3	mab-21 like 3	Other	other
7.89	0.00379	LOC102158235
7.89	0.0339	LOC106507589; LOC106508104
7.62	0.0205	LOC102167861
7.46	0.00141	NAA40		NAA40	N(alpha)-acetyltransferase 40, NatD catalytic subunit	Other	other
7.33	0.00368	FCER1A		FCER1A	Fc fragment of IgE receptor Ia	Plasma Membrane	transmembrane receptor
6.93	0.00845	KLRK1		KLRC4-KLRK1/KLRK1	killer cell lectin like receptor K1	Plasma Membrane	transmembrane receptor
6.8	0.0438	CADM2		CADM2	cell adhesion molecule 2	Plasma Membrane	other
6.76	0.00179	LOC100524089; PRODH2
6.74	0.0195	HNMT		HNMT	histamine N-methyltransferase	Cytoplasm	enzyme
6.72	0.0354	OVOL3	D	OVOL3	ovo like zinc finger 3	Other	other
6.7	0.00194	GHRHR		GHRHR	growth hormone releasing hormone receptor	Plasma Membrane	G-protein coupled receptor	tesamorelin, sermorelin
6.58	0.0269	LOC100037923
6.55	0.0486	CCNA2		CCNA2	cyclin A2	Nucleus	other
6.54	0.0288	MYF6		MYF6	myogenic factor 6	Nucleus	transcription regulator
6.5	0.0497	AKAP9		AKAP9	A-kinase anchoring protein 9	Cytoplasm	other
6.47	0.0119	MYOD1		MYOD1	myogenic differentiation 1	Nucleus	transcription regulator
6.43	0.00719	CD93		CD93	CD93 molecule	Plasma Membrane	other
6.39	0.0327	RAC2; RAC3
6.33	0.0485	LOC100736878
6.05	0.00809	PLEKHA8	D	PLEKHA8	pleckstrin homology domain containing A8	Extracellular Space	transporter
6.04	0.00507	LOC102158126
6.02	0.042	LPAR3	D	LPAR3	lysophosphatidic acid receptor 3	Plasma Membrane	G-protein coupled receptor
5.94	0.000909	GLDN		GLDN	gliomedin	Cytoplasm	other
5.89	0.01	FAM183A		FAM183A	family with sequence similarity 183 member A	Other	other
5.86	0.0293	LOC100037923
5.79	0.024	FCGR1A		FCGR1A	Fc fragment of IgG receptor Ia	Plasma Membrane	transmembrane receptor	IgG
5.75	0.0478	LOC106510386
5.45	0.0177	CEBPA		CEBPA	CCAAT/enhancer binding protein alpha	Nucleus	transcription regulator
5.42	0.0381	IGSF1		IGSF1	immunoglobulin superfamily member 1	Plasma Membrane	other
5.28	0.0223	OVOL3	D	OVOL3	ovo like zinc finger 3	Other	other
5.27	0.0345	ALDOB		ALDOB	aldolase, fructose-bisphosphate B	Cytoplasm	enzyme
5.24	0.0437	OXT		OXT	oxytocin/neurophysin I prepropeptide	Extracellular Space	other
5.17	0.0287	FXYD4		FXYD4	FXYD domain containing ion transport regulator 4	Plasma Membrane	ion channel
5.13	0.0205	IFNG	D	IFNG	interferon gamma	Extracellular Space	cytokine
5.04	0.0154	WDR93		WDR93	WD repeat domain 93	Other	other
5.02	0.0345	LOC100627859
4.98	0.00606	LOC102160313
4.89	0.0272	SLC26A3		SLC26A3	solute carrier family 26 member 3	Plasma Membrane	transporter
4.88	0.0342	CCL24		CCL24	C-C motif chemokine ligand 24	Extracellular Space	cytokine
4.83	0.0249	PIGC		PIGC	phosphatidylinositol glycan anchor biosynthesis class C	Cytoplasm	enzyme
4.77	0.0221	VRK1		VRK1	vaccinia related kinase 1	Nucleus	kinase
4.76	0.0488	LOC100152566
4.68	0.0423	CCL21		CCL21	C-C motif chemokine ligand 21	Extracellular Space	cytokine
4.4	0.00497	CXCL13		CXCL13	C-X-C motif chemokine ligand 13	Extracellular Space	cytokine
4.39	8.3e-05	PWP2		LOC102724159/PWP2	PWP2 periodic tryptophan protein homolog (yeast)	Nucleus	other
4.38	0.0211	A1CF		A1CF	APOBEC1 complementation factor	Nucleus	other
4.33	0.0192	TMEM201		TMEM201	transmembrane protein 201	Nucleus	other
4.3	0.0466	LEP		LEP	leptin	Extracellular Space	growth factor
4.21	0.00252	LOC100153984
4.21	0.0201	LOC100625950; SLC22A1
4.18	0.0203	LOC100738775; PIGR
4.14	0.00527	HRG		HRG	histidine rich glycoprotein	Extracellular Space	other
4.09	0.0159	TAC4		TAC4	tachykinin 4 (hemokinin)	Other	other
4.04	0.0448	MRPL32		MRPL32	mitochondrial ribosomal protein L32	Cytoplasm	translation regulator
3.95	0.0329	ALPI; CHRNG; LOC100521229; LOC100522404; LOC100624831
3.89	0.0302	PLEKHA8	D	PLEKHA8	pleckstrin homology domain containing A8	Extracellular Space	transporter
3.86	0.0296	HR		HR	HR, lysine demethylase and nuclear receptor corepressor	Nucleus	transcription regulator
3.84	0.00681	ADM5		ADM5	adrenomedullin 5 (putative)	Other	other
3.83	0.038	LOC100525876
3.81	0.00157	LOC100158003
3.77	0.0261	MID1		MID1	midline 1	Nucleus	other
3.66	0.0135	AMCF-II
3.65	0.036	NR1I2		NR1I2	nuclear receptor subfamily 1 group I member 2	Nucleus	ligand-dependent nuclear receptor
3.63	0.0295	LOC100516091
3.6	0.0229	MS4A2		MS4A2	membrane spanning 4-domains A2	Plasma Membrane	transmembrane receptor	omalizumab
3.53	0.00612	AMCF-II
3.53	0.0223	LFNG	D	LFNG	LFNG O-fucosylpeptide 3-beta-N-acetylglucosaminyltransferase	Cytoplasm	enzyme
3.52	0.0486	FAM162B	D	FAM162B	family with sequence similarity 162 member B	Other	other
3.47	0.000883	LOC100623618; PACRGL
3.43	0.00283	SLPI		SLPI	secretory leukocyte peptidase inhibitor	Cytoplasm	other
3.42	0.00489	GJA4	D	GJA4	gap junction protein alpha 4	Plasma Membrane	transporter
3.41	0.0452	PHACTR1		PHACTR1	phosphatase and actin regulator 1	Cytoplasm	other
3.39	0.0454	LOC100523976
3.36	0.0302	CD3E		CD3E	CD3e molecule	Plasma Membrane	transmembrane receptor	blinatumomab, muromonab-CD3
3.28	0.049	NSFL1C		NSFL1C	NSFL1 cofactor	Cytoplasm	other
3.27	0.0249	VASH1		VASH1	vasohibin 1	Extracellular Space	other
3.27	0.0254	LOC100154892; LOC100522220
3.22	0.026	TNFSF10	D	TNFSF10	tumor necrosis factor superfamily member 10	Extracellular Space	cytokine
3.22	0.0446	LOC102157594; LOC102167098
3.2	0.00243	WWP1		WWP1	WW domain containing E3 ubiquitin protein ligase 1	Cytoplasm	enzyme
3.16	0.0405	FAM65B		FAM65B	family with sequence similarity 65 member B	Cytoplasm	other
3.14	0.0136	WDR46		WDR46	WD repeat domain 46	Nucleus	enzyme
3.14	0.0443	GAR1; LOC100627522
3.12	0.0124	ARHGDIB		ARHGDIB	Rho GDP dissociation inhibitor beta	Cytoplasm	enzyme
3.05	0.0382	LOC100523020
3.04	0.0477	GRHL2		GRHL2	grainyhead like transcription factor 2	Nucleus	transcription regulator
3	0.0251	ESAM; LOC100627958
2.97	0.0446	TRPT1		TRPT1	tRNA phosphotransferase 1	Other	enzyme
2.95	0.00562	CPN1		CPN1	carboxypeptidase N subunit 1	Extracellular Space	peptidase
2.92	0.0353	TRAPPC12		TRAPPC12	trafficking protein particle complex 12	Nucleus	other
2.92	0.044	LHB		LHB	luteinizing hormone beta polypeptide	Extracellular Space	other
2.91	0.019	CLEC14A		CLEC14A	C-type lectin domain family 14 member A	Cytoplasm	other
2.89	0.0495	GPX6		GPX6	glutathione peroxidase 6	Extracellular Space	enzyme
2.87	0.00238	NGB		NGB	neuroglobin	Cytoplasm	transporter
2.86	0.00676	C8H4orf32
2.86	0.0483	CAST		CAST	calpastatin	Cytoplasm	peptidase
2.83	0.00288	ITGA8		ITGA8	integrin subunit alpha 8	Plasma Membrane	other
2.81	0.0304	RET		RET	ret proto-oncogene	Plasma Membrane	kinase	sunitinib, pazopanib, lenvatinib, motesanib, cabozantinib, amuvatinib, regorafenib, ponatinib, bortezomib/sorafenib, dexamethasone/lenalidomide/sorafenib, bevacizumab/sorafenib, alectinib, imatinib/sirolimus, cabozantinib/erlotinib, imatinib/nilotinib/pegintron, cytarabine/idarubicin/sorafenib, 5-azacytidine/sorafenib, decitabine/sorafenib, MGCD516, everolimus/sorafenib, imatinib, sorafenib, vand…
2.8	0.0261	LOC102167403
2.79	0.0266	LOC106504757
2.78	0.00568	LOC100525396; LOC100525528
2.76	0.000163	PLLP		PLLP	plasmolipin	Plasma Membrane	transporter
2.76	0.00233	SLCO2B1		SLCO2B1	solute carrier organic anion transporter family member 2B1	Plasma Membrane	transporter
2.76	0.0188	MON1A		MON1A	MON1 homolog A, secretory trafficking associated	Other	other
2.73	0.000669	EMB		EMB	embigin	Plasma Membrane	transporter
2.72	0.00792	LOC100513943; SOSTDC1
2.72	0.0133	ZNHIT6		ZNHIT6	zinc finger HIT-type containing 6	Cytoplasm	other
2.7	0.0315	HYAL2		HYAL2	hyaluronoglucosaminidase 2	Cytoplasm	enzyme	hyaluronic acid, hylan, diclofenac/hyaluronic acid
2.69	0.0201	LOC100739633
2.69	0.022	ALPI; LOC100521229
2.69	0.0243	ID4		ID4	inhibitor of DNA binding 4, HLH protein	Nucleus	transcription regulator
2.68	0.00947	LRIG3		LRIG3	leucine rich repeats and immunoglobulin like domains 3	Extracellular Space	other
2.68	0.0108	LOC100626707
2.67	0.025	LOC100152566
2.66	0.0336	LPAR3	D	LPAR3	lysophosphatidic acid receptor 3	Plasma Membrane	G-protein coupled receptor
2.66	0.0395	HSPA4		HSPA4	heat shock protein family A (Hsp70) member 4	Cytoplasm	other
2.62	0.00906	UCAL-P19
2.62	0.0181	LOC100521167
2.62	0.0218	POU1F1	D	POU1F1	POU class 1 homeobox 1	Nucleus	transcription regulator
2.61	0.00503	ABI3		ABI3	ABI family member 3	Plasma Membrane	other
2.61	0.00838	KCTD8		KCTD8	potassium channel tetramerization domain containing 8	Other	other
2.6	0.00898	LOC100626707
2.6	0.0285	IFITM3		IFITM3	interferon induced transmembrane protein 3	Plasma Membrane	other
2.6	0.0439	MEF2C		MEF2C	myocyte enhancer factor 2C	Nucleus	transcription regulator
2.59	0.0145	LMCD1		LMCD1	LIM and cysteine rich domains 1	Cytoplasm	transcription regulator
2.57	0.028	LOC100621762; TEX9
2.57	0.0493	KCNE3		KCNE3	potassium voltage-gated channel subfamily E regulatory subunit 3	Plasma Membrane	ion channel
2.56	0.00579	LOC106504774
2.56	0.012	IFNG	D	IFNG	interferon gamma	Extracellular Space	cytokine
2.55	0.00834	SPHK1		SPHK1	sphingosine kinase 1	Cytoplasm	kinase
2.55	0.0135	TNFSF10	D	TNFSF10	tumor necrosis factor superfamily member 10	Extracellular Space	cytokine
2.54	0.0119	IFIT3		IFIT3	interferon induced protein with tetratricopeptide repeats 3	Cytoplasm	other
2.52	0.00526	PCP4L1		PCP4L1	Purkinje cell protein 4 like 1	Other	other
2.52	0.00857	ADAM19		ADAM19	ADAM metallopeptidase domain 19	Plasma Membrane	peptidase
2.52	0.0134	C7H14orf169
2.52	0.0147	NCOA7	D	NCOA7	nuclear receptor coactivator 7	Nucleus	transcription regulator
2.51	0.0384	QPCTL		QPCTL	glutaminyl-peptide cyclotransferase like	Cytoplasm	enzyme
2.51	0.0456	URM1		URM1	ubiquitin related modifier 1	Cytoplasm	other
2.49	0.0142	INTS10		INTS10	integrator complex subunit 10	Nucleus	other
2.48	0.0349	LOC100154500
2.47	0.00557	NCK2		NCK2	NCK adaptor protein 2	Cytoplasm	kinase
2.47	0.0425	LOC100511937
2.46	0.0349	PNPLA3		PNPLA3	patatin like phospholipase domain containing 3	Cytoplasm	enzyme
2.46	0.0401	LOC100158037
2.45	0.0079	BAG3		BAG3	BCL2 associated athanogene 3	Cytoplasm	other
2.44	0.0085	FPGT		FPGT	fucose-1-phosphate guanylyltransferase	Cytoplasm	enzyme
2.43	0.0241	SNAPC5		SNAPC5	small nuclear RNA activating complex polypeptide 5	Nucleus	transcription regulator
2.42	0.017	SRSF6	D	SRSF6	serine and arginine rich splicing factor 6	Nucleus	other
2.42	0.0368	SPTLC2		SPTLC2	serine palmitoyltransferase long chain base subunit 2	Cytoplasm	enzyme
2.42	0.0459	S1PR5		S1PR5	sphingosine-1-phosphate receptor 5	Plasma Membrane	G-protein coupled receptor	fingolimod phosphate, fingolimod
2.41	0.00163	DRAM2		DRAM2	DNA damage regulated autophagy modulator 2	Cytoplasm	other
2.41	0.0139	MRPS23		MRPS23	mitochondrial ribosomal protein S23	Cytoplasm	other
2.41	0.0318	PECAM1		PECAM1	platelet and endothelial cell adhesion molecule 1	Plasma Membrane	other
2.41	0.0329	SLC1A1		SLC1A1	solute carrier family 1 member 1	Plasma Membrane	transporter	riluzole
2.41	0.0343	CEP70		CEP70	centrosomal protein 70	Cytoplasm	other
2.4	0.0104	VGLL3		VGLL3	vestigial like family member 3	Other	other
2.4	0.0135	LOC100153054; LOC100625210
2.4	0.0231	AKAP12		AKAP12	A-kinase anchoring protein 12	Cytoplasm	transporter
2.4	0.0443	ACSL5		ACSL5	acyl-CoA synthetase long-chain family member 5	Cytoplasm	enzyme
2.39	0.00268	ADGRA3	D	ADGRA3	adhesion G protein-coupled receptor A3	Plasma Membrane	G-protein coupled receptor
2.39	0.0388	ISOC1		ISOC1	isochorismatase domain containing 1	Cytoplasm	enzyme
2.37	0.00627	PKIG		PKIG	protein kinase (cAMP-dependent, catalytic) inhibitor gamma	Other	other
2.37	0.0111	COG8		COG8	component of oligomeric golgi complex 8	Cytoplasm	transporter
2.37	0.0445	DNAJC7		DNAJC7	DnaJ heat shock protein family (Hsp40) member C7	Cytoplasm	other
2.36	0.0452	ANK3		ANK3	ankyrin 3	Plasma Membrane	other
2.35	0.0049	TCEAL3; TCEAL6
2.35	0.0183	SLC25A22		SLC25A22	solute carrier family 25 member 22	Cytoplasm	transporter
2.35	0.021	LOC100738134
2.34	0.00169	NT5DC1		NT5DC1	5'-nucleotidase domain containing 1	Other	other
2.34	0.0386	LOC100621379; S100A2
2.33	0.00125	LOC100621400; RPS13
2.33	0.00145	LOC100623976
2.33	0.00288	HLCS	D	HLCS	holocarboxylase synthetase	Cytoplasm	enzyme
2.33	0.0238	CAMK2N2		CAMK2N2	calcium/calmodulin dependent protein kinase II inhibitor 2	Nucleus	other
2.32	0.00804	LOC106508077
2.32	0.0183	METTL21A		METTL21A	methyltransferase like 21A	Other	enzyme
2.32	0.0213	ENPP1		ENPP1	ectonucleotide pyrophosphatase/phosphodiesterase 1	Plasma Membrane	enzyme
2.32	0.0225	ACAT2	D	ACAT2	acetyl-CoA acetyltransferase 2	Cytoplasm	enzyme
2.32	0.0321	LOC396867
2.32	0.0357	LOC100736880
2.31	0.00138	INTS6		INTS6	integrator complex subunit 6	Nucleus	enzyme
2.31	0.00505	ATP1B3		ATP1B3	ATPase Na+/K+ transporting subunit beta 3	Plasma Membrane	transporter
2.31	0.0485	ABCB11		ABCB11	ATP binding cassette subfamily B member 11	Plasma Membrane	transporter
2.3	0.00117	LYRM4; RPP40
2.3	0.0107	LOC102158937
2.29	0.00389	ODF2L	D	ODF2L	outer dense fiber of sperm tails 2 like	Cytoplasm	other
2.28	0.0224	IFIT2		IFIT2	interferon induced protein with tetratricopeptide repeats 2	Cytoplasm	other
2.27	0.0115	CALML4		CALML4	calmodulin like 4	Other	other
2.27	0.0177	LOC100524883
2.26	0.0292	DPF2		DPF2	double PHD fingers 2	Nucleus	other
2.25	0.0076	MTAP		MTAP	methylthioadenosine phosphorylase	Nucleus	enzyme
2.25	0.0153	DICER1	D	DICER1	dicer 1, ribonuclease III	Cytoplasm	enzyme
2.25	0.0189	ACSL5; LOC100627133
2.24	0.0348	DIO2		DIO2	iodothyronine deiodinase 2	Cytoplasm	enzyme
2.24	0.0484	PIGP		PIGP	phosphatidylinositol glycan anchor biosynthesis class P	Cytoplasm	enzyme
2.23	0.0428	ACSM3		ACSM3	acyl-CoA synthetase medium-chain family member 3	Cytoplasm	enzyme
2.23	0.046	LOC102160135
2.22	0.0132	MCAT		MCAT	malonyl-CoA-acyl carrier protein transacylase	Cytoplasm	enzyme
2.21	0.00293	ZDHHC14		ZDHHC14	zinc finger DHHC-type containing 14	Cytoplasm	enzyme
2.21	0.00957	MAN1A1		MAN1A1	mannosidase alpha class 1A member 1	Cytoplasm	enzyme
2.21	0.0273	FAM162B	D	FAM162B	family with sequence similarity 162 member B	Other	other
2.2	0.000362	SRSF6	D	SRSF6	serine and arginine rich splicing factor 6	Nucleus	other
2.2	0.0251	RAMP2		RAMP2	receptor activity modifying protein 2	Plasma Membrane	transporter	pramlintide
2.19	0.00233	PODNL1		PODNL1	podocan like 1	Extracellular Space	other
2.19	0.00663	LGI4		LGI4	leucine rich repeat LGI family member 4	Extracellular Space	other
2.19	0.00851	HSPA4L		HSPA4L	heat shock protein family A (Hsp70) member 4 like	Cytoplasm	other
2.19	0.0142	FBXO7		FBXO7	F-box protein 7	Cytoplasm	enzyme
2.19	0.0206	PYGM		PYGM	glycogen phosphorylase, muscle associated	Cytoplasm	enzyme
2.19	0.0232	PPRC1		PPRC1	peroxisome proliferator-activated receptor gamma, coactivator-related 1	Nucleus	transcription regulator
2.18	0.00217	LOC100511884; LOC100622387
2.18	0.0286	LOC100517721
2.17	0.000365	SRSF6	D	SRSF6	serine and arginine rich splicing factor 6	Nucleus	other
2.17	0.00108	SLC35F2		SLC35F2	solute carrier family 35 member F2	Other	other
2.17	0.00212	LOC102164436
2.17	0.00239	LEO1		LEO1	LEO1 homolog, Paf1/RNA polymerase II complex component	Nucleus	other
2.17	0.00737	GAS1	D	GAS1	growth arrest specific 1	Plasma Membrane	other
2.17	0.0103	STEAP4		STEAP4	STEAP4 metalloreductase	Plasma Membrane	enzyme
2.17	0.0476	TCAP		TCAP	titin-cap	Cytoplasm	other
2.16	0.0136	NCOA7	D	NCOA7	nuclear receptor coactivator 7	Nucleus	transcription regulator
2.16	0.0239	FAAP24		FAAP24	Fanconi anemia core complex associated protein 24	Nucleus	other
2.15	0.0384	SESN1		SESN1	sestrin 1	Nucleus	other
2.14	0.0445	ADAMTS3		ADAMTS3	ADAM metallopeptidase with thrombospondin type 1 motif 3	Extracellular Space	peptidase
2.13	0.00648	RBM25		RBM25	RNA binding motif protein 25	Nucleus	other
2.13	0.0179	DTX4		DTX4	deltex E3 ubiquitin ligase 4	Cytoplasm	enzyme
2.13	0.0304	LOC100624528; NOP56
2.13	0.0389	PIK3R2		PIK3R2	phosphoinositide-3-kinase regulatory subunit 2	Cytoplasm	kinase
2.12	0.0261	TNFRSF17		TNFRSF17	TNF receptor superfamily member 17	Plasma Membrane	transmembrane receptor
2.12	0.0374	LRRC20		LRRC20	leucine rich repeat containing 20	Other	other
2.11	0.0299	ALB		ALB	albumin	Extracellular Space	transporter	gadofosveset trisodium, aldoxorubicin
2.11	0.0333	PRSS12		PRSS12	protease, serine 12	Extracellular Space	peptidase
2.11	0.0371	KRT19		KRT19	keratin 19	Cytoplasm	other
2.11	0.0477	LRRFIP1		LRRFIP1	LRR binding FLII interacting protein 1	Cytoplasm	other
2.1	0.0157	LOC100518620
2.1	0.0256	DNAJC9; LOC100739807
2.1	0.0334	RHPN2		RHPN2	rhophilin Rho GTPase binding protein 2	Cytoplasm	other
2.1	0.0439	WAS		WAS	Wiskott-Aldrich syndrome	Cytoplasm	other
2.09	0.0156	BRF2		BRF2	BRF2, RNA polymerase III transcription initiation factor 50 kDa subunit	Nucleus	transcription regulator
2.09	0.0426	GULO
2.08	0.00777	CPT1C		CPT1C	carnitine palmitoyltransferase 1C	Cytoplasm	enzyme
2.08	0.0139	LOC106504110
2.08	0.0148	LOC106506712
2.08	0.0414	SMC4		SMC4	structural maintenance of chromosomes 4	Nucleus	transporter
2.07	0.00801	CWC22		CWC22	CWC22 spliceosome associated protein homolog	Nucleus	other
2.06	0.0244	C1H9orf114
2.06	0.0464	NMI		NMI	N-myc and STAT interactor	Cytoplasm	transcription regulator
2.05	0.00239	EBNA1BP2		EBNA1BP2	EBNA1 binding protein 2	Nucleus	other
2.05	0.00315	GPATCH4		GPATCH4	G-patch domain containing 4	Other	other
2.05	0.0119	CDH5		CDH5	cadherin 5	Plasma Membrane	other
2.05	0.0137	FASN		FASN	fatty acid synthase	Cytoplasm	enzyme	TVB-2640, orlistat, cerulenin
2.04	0.0138	LOC100522795; REV1
2.04	0.0183	HOXD8		HOXD8	homeobox D8	Nucleus	transcription regulator
2.03	0.00362	LOC100626657
2.03	0.00415	NR2F2	D	NR2F2	nuclear receptor subfamily 2 group F member 2	Nucleus	ligand-dependent nuclear receptor
2.03	0.0127	ODF2L	D	ODF2L	outer dense fiber of sperm tails 2 like	Cytoplasm	other
2.03	0.0205	MFSD6L		MFSD6L	major facilitator superfamily domain containing 6 like	Other	other
2.03	0.043	LOC100622870
2.03	0.0441	GPSM2		GPSM2	G-protein signaling modulator 2	Nucleus	other
2.02	0.000598	KDR		KDR	kinase insert domain receptor	Plasma Membrane	kinase	AEE 788, sunitinib, cediranib, pazopanib, axitinib, tesevatinib, CEP 7055, brivanib alaninate, CHIR-265, lenvatinib, tivozanib, BMS-690514, motesanib, OSI-930, telatinib, XL999, brivanib, ramucirumab, cabozantinib, nintedanib, XL820, pegdinetanib, foretinib, regorafenib, golvatinib, TAK 593, apatinib, CP-547632, PF 00337210, JI 101, CYC 116, bortezomib/sorafenib, lapatinib/pazopanib, dexamethason…
2.02	0.0134	WIPI1		WIPI1	WD repeat domain, phosphoinositide interacting 1	Cytoplasm	other
2.02	0.0287	CBR2
2.02	0.0418	TMEM165		TMEM165	transmembrane protein 165	Plasma Membrane	other
2.02	0.0463	NDUFAF6		NDUFAF6	NADH:ubiquinone oxidoreductase complex assembly factor 6	Cytoplasm	other
2.01	0.00372	AKAP9; LOC102168136
2.01	0.0228	ACSL1		ACSL1	acyl-CoA synthetase long-chain family member 1	Cytoplasm	enzyme
2.01	0.0325	LOC102160730
2	0.00236	GAS1	D	GAS1	growth arrest specific 1	Plasma Membrane	other
2	0.00494	ZNF32	D	ZNF32	zinc finger protein 32	Nucleus	other
2	0.0183	MYBPC1		MYBPC1	myosin binding protein C, slow type	Cytoplasm	other
2	0.0286	DNAJC15		DNAJC15	DnaJ heat shock protein family (Hsp40) member C15	Cytoplasm	other
2	0.0289	DTX3L		DTX3L	deltex E3 ubiquitin ligase 3L	Cytoplasm	enzyme
1.99	0.00328	AHCTF1		AHCTF1	AT-hook containing transcription factor 1	Nucleus	transcription regulator
1.99	0.0134	ZAN		ZAN	zonadhesin (gene/pseudogene)	Plasma Membrane	other
1.99	0.0276	RBL1		RBL1	RB transcriptional corepressor like 1	Nucleus	transcription regulator
1.99	0.0359	NEK2		NEK2	NIMA related kinase 2	Cytoplasm	kinase
1.98	0.000911	TOP2A		TOP2A	topoisomerase (DNA) II alpha	Nucleus	enzyme	novobiocin, etoposide, teniposide, CPI-0004Na, becatecarin, elsamitrucin, AQ4N, elomotecan, tafluposide, fleroxacin, cyclophosphamide/epirubicin/5-fluorouracil, cytarabine/daunorubicin, finafloxacin, hydrocortisone/mitoxantrone, mitoxantrone/prednisone, cladribine/cytarabine/daunorubicin, cytarabine/daunorubicin/tretinoin, cytarabine/idarubicin, idarubicin/mitoxantrone/tretinoin, arsenic trioxide…
1.98	0.00127	C7H6orf89
1.98	0.00358	STAR		STAR	steroidogenic acute regulatory protein	Cytoplasm	transporter
1.98	0.00385	ANKRD10		ANKRD10	ankyrin repeat domain 10	Nucleus	transcription regulator
1.98	0.0166	METTL17		METTL17	methyltransferase like 17	Nucleus	other
1.98	0.0319	FLT1		FLT1	fms related tyrosine kinase 1	Plasma Membrane	kinase	sunitinib, pazopanib, axitinib, CEP 7055, lenvatinib, BMS-690514, motesanib, cabozantinib, nintedanib, XL844, regorafenib, bortezomib/sorafenib, lapatinib/pazopanib, dexamethasone/lenalidomide/sorafenib, bevacizumab/sorafenib, MGCD-265, cabozantinib/erlotinib, famitinib, lucitanib, cytarabine/idarubicin/sorafenib, 5-azacytidine/sorafenib, decitabine/sorafenib, fruquintinib, MGCD516, SAR103168, su…
1.98	0.0412	ZNF674		ZNF674	zinc finger protein 674	Other	other
1.97	0.00753	LOC100514506; LOC106508692
1.97	0.0183	LOC100519345
1.97	0.0368	RUNDC3A		RUNDC3A	RUN domain containing 3A	Cytoplasm	other
1.96	0.00814	LOC100626247
1.96	0.0121	ITGB8	D	ITGB8	integrin subunit beta 8	Plasma Membrane	other
1.96	0.0142	LOC100621115
1.96	0.0229	NNT		NNT	nicotinamide nucleotide transhydrogenase	Cytoplasm	enzyme
1.96	0.0252	NOL6		NOL6	nucleolar protein 6	Nucleus	other
1.96	0.0463	SHE		SHE	Src homology 2 domain containing E	Cytoplasm	other
1.95	0.00368	SSB		SSB	Sjogren syndrome antigen B	Nucleus	enzyme
1.95	0.0085	ARPP21; LOC100625402
1.95	0.00949	MAT2A		MAT2A	methionine adenosyltransferase 2A	Cytoplasm	enzyme
1.95	0.0113	TCF21		TCF21	transcription factor 21	Nucleus	transcription regulator
1.95	0.0454	PPAN		PPAN	peter pan homolog (Drosophila)	Nucleus	other
1.94	0.00287	UBTF		UBTF	upstream binding transcription factor, RNA polymerase I	Nucleus	transcription regulator
1.94	0.00383	PBRM1		PBRM1	polybromo 1	Nucleus	other
1.94	0.0133	RMI2		RMI2	RecQ mediated genome instability 2	Nucleus	other
1.94	0.0399	ADGRF2		ADGRF2	adhesion G protein-coupled receptor F2	Plasma Membrane	G-protein coupled receptor
1.94	0.0474	GLUL		GLUL	glutamate-ammonia ligase	Cytoplasm	enzyme
1.93	0.00145	PITRM1	D	PITRM1	pitrilysin metallopeptidase 1	Cytoplasm	peptidase
1.93	0.0214	MAP10		MAP10	microtubule associated protein 10	Extracellular Space	other
1.93	0.0217	AREL1		AREL1	apoptosis resistant E3 ubiquitin protein ligase 1	Cytoplasm	enzyme
1.93	0.0232	PITRM1	D	PITRM1	pitrilysin metallopeptidase 1	Cytoplasm	peptidase
1.92	0.0138	LOC396858
1.92	0.0184	CP		CP	ceruloplasmin	Extracellular Space	enzyme
1.92	0.0227	LOC100626707
1.92	0.0242	ENC1		ENC1	ectodermal-neural cortex 1	Nucleus	peptidase
1.91	0.000878	S1PR3		S1PR3	sphingosine-1-phosphate receptor 3	Plasma Membrane	G-protein coupled receptor	fingolimod phosphate
1.91	0.00771	HGH1; LOC100516907
1.91	0.0228	FAM155B		FAM155B	family with sequence similarity 155 member B	Plasma Membrane	transmembrane receptor
1.91	0.0229	LOC100523976
1.91	0.0257	MECR		MECR	mitochondrial trans-2-enoyl-CoA reductase	Cytoplasm	enzyme
1.91	0.0342	SLC25A20		SLC25A20	solute carrier family 25 member 20	Cytoplasm	transporter
1.91	0.0467	CD2		CD2	CD2 molecule	Plasma Membrane	transmembrane receptor	alefacept, siplizumab
1.9	0.00112	LOC102162472
1.9	0.00273	DYNC2LI1		DYNC2LI1	dynein cytoplasmic 2 light intermediate chain 1	Cytoplasm	other
1.9	0.00673	MRI1		MRI1	methylthioribose-1-phosphate isomerase 1	Cytoplasm	translation regulator
1.9	0.0107	TP53RK		TP53RK	TP53 regulating kinase	Nucleus	kinase
1.9	0.0107	NOTCH4		NOTCH4	notch 4	Plasma Membrane	transcription regulator
1.9	0.0162	CXADR	D	CXADR	coxsackie virus and adenovirus receptor	Plasma Membrane	transmembrane receptor
1.9	0.0264	CXCL12		CXCL12	C-X-C motif chemokine ligand 12	Extracellular Space	cytokine	NOX-A12
1.9	0.0287	SCAMP3		SCAMP3	secretory carrier membrane protein 3	Cytoplasm	transporter
1.9	0.0294	LOC100623881; LOC102167663
1.9	0.0343	LTB		LTB	lymphotoxin beta	Extracellular Space	cytokine
1.9	0.0424	NR2C1		NR2C1	nuclear receptor subfamily 2 group C member 1	Nucleus	transcription regulator
1.9	0.0437	INHA		INHA	inhibin alpha subunit	Extracellular Space	growth factor
1.9	0.0459	PPIG		PPIG	peptidylprolyl isomerase G	Nucleus	enzyme
1.89	0.00272	NUDT5		NUDT5	nudix hydrolase 5	Cytoplasm	phosphatase
1.89	0.0169	GTF2F2		GTF2F2	general transcription factor IIF subunit 2	Nucleus	transcription regulator
1.89	0.0195	SCAMP5		SCAMP5	secretory carrier membrane protein 5	Cytoplasm	other
1.89	0.0284	TMEM144		TMEM144	transmembrane protein 144	Other	other
1.89	0.0344	GNA11		GNA11	G protein subunit alpha 11	Plasma Membrane	enzyme
1.89	0.0369	TCF19		TCF19	transcription factor 19	Nucleus	transcription regulator
1.89	0.0395	ANKS3		ANKS3	ankyrin repeat and sterile alpha motif domain containing 3	Nucleus	transcription regulator
1.89	0.0422	FAIM		FAIM	Fas apoptotic inhibitory molecule	Plasma Membrane	other
1.89	0.0481	RNLS		RNLS	renalase, FAD dependent amine oxidase	Extracellular Space	enzyme
1.88	0.00741	PTOV1		PTOV1	prostate tumor overexpressed 1	Nucleus	other
1.88	0.0234	SLC35D2		SLC35D2	solute carrier family 35 member D2	Cytoplasm	transporter
1.88	0.0238	LOC102164161
1.87	0.0141	AMOT	D	AMOT	angiomotin	Plasma Membrane	other
1.87	0.0226	EXO1		EXO1	exonuclease 1	Nucleus	enzyme
1.87	0.0421	LARP4; LOC100518731
1.86	0.000472	LOC100518777; LOC100627959
1.86	0.00638	LOC100521932; LOC100736657
1.86	0.00796	E2F3		E2F3	E2F transcription factor 3	Nucleus	transcription regulator
1.86	0.0149	EIF4G1		EIF4G1	eukaryotic translation initiation factor 4 gamma 1	Cytoplasm	translation regulator
1.86	0.0246	FAM171B		FAM171B	family with sequence similarity 171 member B	Other	other
1.86	0.0414	ITGB8	D	ITGB8	integrin subunit beta 8	Plasma Membrane	other
1.86	0.0459	EEF1E1		EEF1E1	eukaryotic translation elongation factor 1 epsilon 1	Cytoplasm	translation regulator
1.85	0.00636	MCCC1		MCCC1	methylcrotonoyl-CoA carboxylase 1	Cytoplasm	enzyme
1.85	0.00679	GJA4	D	GJA4	gap junction protein alpha 4	Plasma Membrane	transporter
1.85	0.00997	CYYR1		CYYR1	cysteine and tyrosine rich 1	Other	other
1.85	0.0113	LOC100524899; NAA38
1.85	0.0279	NFIA		NFIA	nuclear factor I A	Nucleus	transcription regulator
1.84	0.00438	LOC100157336
1.84	0.01	LOC106504973
1.84	0.0139	LOC100511382
1.84	0.0252	SKP2		SKP2	S-phase kinase associated protein 2	Nucleus	enzyme
1.84	0.0349	MTCH2		MTCH2	mitochondrial carrier 2	Cytoplasm	other
1.84	0.035	LOC102158761
1.84	0.0437	LOC100625138
1.84	0.0463	LOC100514431; LOC100737004
1.84	0.0465	LFNG	D	LFNG	LFNG O-fucosylpeptide 3-beta-N-acetylglucosaminyltransferase	Cytoplasm	enzyme
1.83	0.00808	CACYBP		CACYBP	calcyclin binding protein	Nucleus	other
1.83	0.013	HELLS	D	HELLS	helicase, lymphoid-specific	Nucleus	enzyme
1.83	0.043	FLRT2		FLRT2	fibronectin leucine rich transmembrane protein 2	Plasma Membrane	other
1.82	0.00103	LOC100512379; LOC100512748
1.82	0.00338	LOC106504142
1.82	0.0155	LOC100621315
1.82	0.022	MSL1		MSL1	male specific lethal 1 homolog	Nucleus	other
1.81	0.0168	RNF40		RNF40	ring finger protein 40	Cytoplasm	enzyme
1.81	0.0239	TRUB2		TRUB2	TruB pseudouridine synthase family member 2	Cytoplasm	enzyme
1.81	0.0245	LUZP1		LUZP1	leucine zipper protein 1	Nucleus	other
1.81	0.039	AMOT	D	AMOT	angiomotin	Plasma Membrane	other
1.81	0.0401	LOC100517801; LOC100739564
1.81	0.0408	RNF128		RNF128	ring finger protein 128, E3 ubiquitin protein ligase	Cytoplasm	enzyme
1.8	0.0109	DENND4B		DENND4B	DENN domain containing 4B	Extracellular Space	other
1.8	0.0162	TIPIN		TIPIN	TIMELESS interacting protein	Nucleus	other
1.8	0.0165	IGF1R		IGF1R	insulin like growth factor 1 receptor	Plasma Membrane	transmembrane receptor	picropodophyllin, linsitinib, cixutumumab, ganitumab, AVE1642, BMS-754807, XL228, BIIB022, IGF1, dalotuzumab, ceritinib, [I-124]-CPD-1028, MM-141, IGF-methotrexate conjugate, PL225B, KW-2450
1.79	0.00214	DICER1	D	DICER1	dicer 1, ribonuclease III	Cytoplasm	enzyme
1.79	0.00292	IRF2BP1		IRF2BP1	interferon regulatory factor 2 binding protein 1	Nucleus	transcription regulator
1.79	0.00435	SRSF6	D	SRSF6	serine and arginine rich splicing factor 6	Nucleus	other
1.79	0.00488	SLC6A3		SLC6A3	solute carrier family 6 member 3	Plasma Membrane	transporter	acetaminophen/clemastine/pseudoephedrine, acetaminophen/dexbrompheniramine/pseudoephedrine, dexbrompheniramine/pseudoephedrine, chlorpheniramine/ibuprofen/pseudoephedrine, cetirizine/pseudoephedrine, lisdexamfetamine, DOV-102,677, armodafinil, phentermine/topiramate, ioflupane I-123, hydrocodone/pseudoephedrine, bupropion/naltrexone, fexofenadine/pseudoephedrine, fenfluramine/phentermine, loratad…
1.79	0.00772	LOC100520621; TAP1
1.79	0.0106	FBXO9		FBXO9	F-box protein 9	Cytoplasm	enzyme
1.79	0.0109	RXRA		RXRA	retinoid X receptor alpha	Nucleus	ligand-dependent nuclear receptor	etretinate, daunorubicin/tretinoin, idarubicin/tretinoin, doxorubicin/tretinoin, bexarotene, acitretin, tretinoin, alitretinoin
1.79	0.0146	ZFX		ZFX	zinc finger protein, X-linked	Nucleus	transcription regulator
1.79	0.0413	IRAK1BP1		IRAK1BP1	interleukin 1 receptor associated kinase 1 binding protein 1	Other	other
1.79	0.0429	MAT2B	D	MAT2B	methionine adenosyltransferase 2B	Cytoplasm	enzyme
1.79	0.0436	DBNDD1	D	DBNDD1	dysbindin domain containing 1	Other	other
1.79	0.044	NANP		NANP	N-acetylneuraminic acid phosphatase	Cytoplasm	enzyme
1.78	0.000202	ACAT2	D	ACAT2	acetyl-CoA acetyltransferase 2	Cytoplasm	enzyme
1.78	0.000606	LOC100525572
1.78	0.00376	NDUFA5		NDUFA5	NADH:ubiquinone oxidoreductase subunit A5	Cytoplasm	enzyme
1.78	0.00758	LOC100157061
1.78	0.0155	PLSCR1		PLSCR1	phospholipid scramblase 1	Plasma Membrane	enzyme
1.78	0.0173	HTR1D		HTR1D	5-hydroxytryptamine receptor 1D	Plasma Membrane	G-protein coupled receptor	caffeine/ergotamine, donitriptan, naproxen/sumatriptan, sumatriptan, eletriptan, frovatriptan, almotriptan, fenfluramine, ziprasidone, dihydroergotamine, ergotamine, naratriptan, zolmitriptan, rizatriptan
1.78	0.032	LOC102164147
1.78	0.0344	CELF2		CELF2	CUGBP, Elav-like family member 2	Nucleus	other
1.78	0.0429	HELLS	D	HELLS	helicase, lymphoid-specific	Nucleus	enzyme
1.77	0.00168	LARP4; LOC100518731
1.77	0.0029	LYRM4		LYRM4	LYR motif containing 4	Cytoplasm	other
1.77	0.00544	ALOX15		ALOX15	arachidonate 15-lipoxygenase	Cytoplasm	enzyme
1.77	0.0132	RPS19BP1		RPS19BP1	ribosomal protein S19 binding protein 1	Nucleus	other
1.77	0.0163	GPAM		GPAM	glycerol-3-phosphate acyltransferase, mitochondrial	Cytoplasm	enzyme
1.77	0.0329	LOC102162502
1.77	0.0375	PAPOLA		PAPOLA	poly(A) polymerase alpha	Nucleus	enzyme
1.77	0.0397	ZNF630		ZNF630	zinc finger protein 630	Other	other
1.76	0.00196	ZBTB7A		ZBTB7A	zinc finger and BTB domain containing 7A	Nucleus	transcription regulator
1.76	0.0087	CLN6	D	CLN6	ceroid-lipofuscinosis, neuronal 6, late infantile, variant	Cytoplasm	other
1.76	0.0155	NASP	D	NASP	nuclear autoantigenic sperm protein	Nucleus	other
1.76	0.0185	WDR81		WDR81	WD repeat domain 81	Plasma Membrane	other
1.75	0.00385	GLYR1	D	GLYR1	glyoxylate reductase 1 homolog	Other	other
1.75	0.0049	EXOSC2		EXOSC2	exosome component 2	Nucleus	enzyme
1.75	0.0133	LOC100524802; LOC100525517
1.75	0.0144	PUS1		PUS1	pseudouridylate synthase 1	Nucleus	enzyme
1.75	0.0179	AP1M1		AP1M1	adaptor related protein complex 1 mu 1 subunit	Cytoplasm	transporter
1.75	0.0224	SLC11A2		SLC11A2	solute carrier family 11 member 2	Plasma Membrane	transporter
1.75	0.0375	LOC100520931; LOC106504190; TLR9
1.74	0.00927	FBXO41		FBXO41	F-box protein 41	Cytoplasm	other
1.74	0.0153	BBIP1		BBIP1	BBSome interacting protein 1	Cytoplasm	other
1.74	0.0178	LOC100623372; TTF2
1.74	0.0187	LOC100626253
1.74	0.0201	UBE2T		UBE2T	ubiquitin conjugating enzyme E2 T	Nucleus	enzyme
1.74	0.0206	FAM136A; LOC100155468
1.74	0.0324	METTL5		METTL5	methyltransferase like 5	Other	enzyme
1.74	0.0328	PDE4DIP		PDE4DIP	phosphodiesterase 4D interacting protein	Cytoplasm	enzyme
1.74	0.037	LOC102161729
1.74	0.043	HN1		HN1	hematological and neurological expressed 1	Nucleus	other
1.74	0.0458	LOC100519100
1.73	0.000787	PEX12		PEX12	peroxisomal biogenesis factor 12	Cytoplasm	other
1.73	0.00422	TSHZ2		TSHZ2	teashirt zinc finger homeobox 2	Other	other
1.73	0.0127	SYCP3		SYCP3	synaptonemal complex protein 3	Nucleus	other
1.73	0.0159	GPR39		GPR39	G protein-coupled receptor 39	Plasma Membrane	G-protein coupled receptor
1.73	0.0211	WDR74		WDR74	WD repeat domain 74	Nucleus	other
1.73	0.0359	MCUR1		MCUR1	mitochondrial calcium uniporter regulator 1	Cytoplasm	other
1.73	0.0379	HSPH1		HSPH1	heat shock protein family H (Hsp110) member 1	Cytoplasm	other
1.73	0.0469	TBL3		TBL3	transducin beta like 3	Cytoplasm	peptidase
1.72	0.0036	STARD8		STARD8	StAR related lipid transfer domain containing 8	Cytoplasm	other
1.72	0.00567	FILIP1L; LOC100157058
1.72	0.00965	DROSHA		DROSHA	drosha ribonuclease III	Nucleus	enzyme
1.72	0.0139	LOC100512567
1.72	0.0155	DKC1		DKC1	dyskerin pseudouridine synthase 1	Nucleus	enzyme
1.72	0.0209	LOC100737712; LRCH4
1.72	0.0254	ARL4A		ARL4A	ADP ribosylation factor like GTPase 4A	Nucleus	enzyme
1.72	0.0298	TMTC4		TMTC4	transmembrane and tetratricopeptide repeat containing 4	Other	other
1.72	0.0298	LOC106507968
1.72	0.0377	DDX42		DDX42	DEAD-box helicase 42	Cytoplasm	enzyme
1.72	0.0408	BMPR1B		BMPR1B	bone morphogenetic protein receptor type 1B	Plasma Membrane	kinase
1.72	0.0496	TTLL12		TTLL12	tubulin tyrosine ligase like 12	Other	other
1.71	0.00469	LOC100154789
1.71	0.00544	ADGRA3	D	ADGRA3	adhesion G protein-coupled receptor A3	Plasma Membrane	G-protein coupled receptor
1.71	0.00596	ZNF322		ZNF322	zinc finger protein 322	Cytoplasm	other
1.71	0.00852	KIAA1551		KIAA1551	KIAA1551	Other	other
1.71	0.01	MYCBP		MYCBP	MYC binding protein	Nucleus	transcription regulator
1.71	0.0115	WNK4		WNK4	WNK lysine deficient protein kinase 4	Plasma Membrane	kinase
1.71	0.0124	LOC100518619
1.71	0.0176	LOC100516759; LOC106504109
1.71	0.0183	LPCAT3		LPCAT3	lysophosphatidylcholine acyltransferase 3	Plasma Membrane	enzyme
1.71	0.0374	NUP85		NUP85	nucleoporin 85	Cytoplasm	other
1.71	0.0377	LOC100621428
1.71	0.0428	BUB3		BUB3	BUB3, mitotic checkpoint protein	Nucleus	other
1.7	0.000634	CDC23		CDC23	cell division cycle 23	Nucleus	enzyme
1.7	0.0091	NAA50		NAA50	N(alpha)-acetyltransferase 50, NatE catalytic subunit	Cytoplasm	enzyme
1.7	0.0179	CRYZL1		CRYZL1	crystallin zeta like 1	Cytoplasm	enzyme
1.7	0.0208	THOC2		THOC2	THO complex 2	Nucleus	other
1.7	0.0249	NOP16		NOP16	NOP16 nucleolar protein	Nucleus	other
1.7	0.0272	TXNDC15		TXNDC15	thioredoxin domain containing 15	Other	enzyme
1.7	0.0278	LOC102162472
1.69	0.000473	PEX3		PEX3	peroxisomal biogenesis factor 3	Cytoplasm	other
1.69	0.00438	FAM57A		FAM57A	family with sequence similarity 57 member A	Plasma Membrane	other
1.69	0.00545	PTP4A2		PTP4A2	protein tyrosine phosphatase type IVA, member 2	Cytoplasm	phosphatase
1.69	0.00614	AMD1		AMD1	adenosylmethionine decarboxylase 1	Cytoplasm	enzyme
1.69	0.01	LOC100514614
1.69	0.015	ABHD5		ABHD5	abhydrolase domain containing 5	Cytoplasm	enzyme
1.69	0.0172	ISG12
1.69	0.0196	POLD2		POLD2	DNA polymerase delta 2, accessory subunit	Nucleus	enzyme
1.69	0.0243	PRMT9		PRMT9	protein arginine methyltransferase 9	Other	other
1.69	0.0283	PQLC2		PQLC2	PQ loop repeat containing 2	Cytoplasm	transporter
1.69	0.0351	TRIM3		TRIM3	tripartite motif containing 3	Cytoplasm	enzyme
1.69	0.0453	CYFIP2		CYFIP2	cytoplasmic FMR1 interacting protein 2	Cytoplasm	other
1.68	0.0128	LOC100526164
1.68	0.0191	TEX2		TEX2	testis expressed 2	Other	other
1.68	0.0372	CNP		CNP	2',3'-cyclic nucleotide 3' phosphodiesterase	Cytoplasm	enzyme
1.68	0.0467	TMEM19		TMEM19	transmembrane protein 19	Other	other
1.67	8.4e-05	LPGAT1		LPGAT1	lysophosphatidylglycerol acyltransferase 1	Cytoplasm	enzyme
1.67	0.000998	LOC102164825
1.67	0.00157	LOC100155295; LOC100157289
1.67	0.0137	EIF2S1		EIF2S1	eukaryotic translation initiation factor 2 subunit alpha	Cytoplasm	translation regulator
1.67	0.0279	LOC100514323
1.67	0.0386	TARBP1		TARBP1	TAR (HIV-1) RNA binding protein 1	Nucleus	transcription regulator
1.67	0.0395	DNAJC21		DNAJC21	DnaJ heat shock protein family (Hsp40) member C21	Other	other
1.66	5e-06	TBPL1		TBPL1	TATA-box binding protein like 1	Nucleus	transcription regulator
1.66	0.00089	LPCAT1		LPCAT1	lysophosphatidylcholine acyltransferase 1	Cytoplasm	enzyme
1.66	0.00124	EML4		EML4	echinoderm microtubule associated protein like 4	Cytoplasm	other
1.66	0.00194	CEP44		CEP44	centrosomal protein 44	Cytoplasm	other
1.66	0.00372	IFI16		IFI16	interferon gamma inducible protein 16	Nucleus	transcription regulator
1.66	0.00394	B3GALNT1		B3GALNT1	beta-1,3-N-acetylgalactosaminyltransferase 1 (globoside blood group)	Cytoplasm	enzyme
1.66	0.00434	PHOSPHO2		PHOSPHO2	phosphatase, orphan 2	Other	other
1.66	0.0174	AKIP1		AKIP1	A-kinase interacting protein 1	Nucleus	other
1.66	0.0186	NR2F2	D	NR2F2	nuclear receptor subfamily 2 group F member 2	Nucleus	ligand-dependent nuclear receptor
1.66	0.0187	TOR1A		TOR1A	torsin family 1 member A	Cytoplasm	enzyme
1.66	0.0188	ADPRHL2		ADPRHL2	ADP-ribosylhydrolase like 2	Cytoplasm	enzyme
1.66	0.0198	ATF6B		ATF6B	activating transcription factor 6 beta	Nucleus	transcription regulator
1.66	0.0199	MYO19		MYO19	myosin XIX	Cytoplasm	enzyme
1.66	0.0236	HBB		HBB	hemoglobin subunit beta	Cytoplasm	transporter	iron dextran
1.66	0.024	SMPD4		SMPD4	sphingomyelin phosphodiesterase 4	Cytoplasm	enzyme
1.66	0.0331	AK3		AK3	adenylate kinase 3	Cytoplasm	kinase
1.66	0.0433	HRH1		HRH1	histamine receptor H1	Plasma Membrane	G-protein coupled receptor	paliperidone, risperidone, antazoline/naphazoline, antazoline, dexbrompheniramine, acetaminophen/clemastine/pseudoephedrine, acetaminophen/dexbrompheniramine/pseudoephedrine, dexbrompheniramine/pseudoephedrine, chlorpheniramine/ibuprofen/pseudoephedrine, cetirizine/pseudoephedrine, asenapine, bilastine, doxylamine, cinnarizine, trimeprazine, tripelennamine, mequitazine, desmethylazelastine, dimet…
1.66	0.0477	ACTL6A		ACTL6A	actin like 6A	Nucleus	other
1.65	0.000401	CSTF1		CSTF1	cleavage stimulation factor subunit 1	Nucleus	other
1.65	0.0101	NIP7		NIP7	NIP7, nucleolar pre-rRNA processing protein	Nucleus	other
1.65	0.012	LOC100627401
1.65	0.024	FADS1		FADS1	fatty acid desaturase 1	Plasma Membrane	enzyme
1.65	0.0268	DECR1		DECR1	2,4-dienoyl-CoA reductase 1, mitochondrial	Cytoplasm	enzyme
1.64	0.0118	PIK3C2B		PIK3C2B	phosphatidylinositol-4-phosphate 3-kinase catalytic subunit type 2 beta	Cytoplasm	kinase
1.64	0.0146	DNAJC19; LOC100521801
1.64	0.0196	GINS4		GINS4	GINS complex subunit 4	Nucleus	other
1.64	0.0206	LOC100515066; LOC100739296
1.64	0.0237	LOC102161823
1.64	0.034	PNMA1	D	PNMA1	paraneoplastic Ma antigen 1	Nucleus	other
1.64	0.0412	DNMT1		DNMT1	DNA methyltransferase 1	Nucleus	enzyme	5-azacytidine/decitabine, 5-azacytidine/cytarabine/decitabine, 5-azacytidine/sorafenib, decitabine/sorafenib, cladribine/cytarabine/decitabine, 5-azacytidine, decitabine
1.63	0.000886	SLC38A9		SLC38A9	solute carrier family 38 member 9	Extracellular Space	transporter
1.63	0.00884	LOC100511406; LOC100737591
1.63	0.0115	MTF2		MTF2	metal response element binding transcription factor 2	Nucleus	transcription regulator
1.63	0.0133	TIGD2		TIGD2	tigger transposable element derived 2	Other	other
1.63	0.0155	NSMCE4A		NSMCE4A	NSE4 homolog A, SMC5-SMC6 complex component	Nucleus	other
1.63	0.0172	ATRN		ATRN	attractin	Extracellular Space	other
1.63	0.0208	LOC100511498; MEPCE
1.63	0.0287	FCRL5		FCRL5	Fc receptor like 5	Plasma Membrane	other
1.63	0.0349	LOC100524475; LOC100739836
1.62	0.000189	NASP	D	NASP	nuclear autoantigenic sperm protein	Nucleus	other
1.62	0.00223	LOC100738689; LOC102161567
1.62	0.00373	EWSR1		EWSR1	EWS RNA binding protein 1	Nucleus	other
1.62	0.0049	YLPM1		YLPM1	YLP motif containing 1	Nucleus	transcription regulator
1.62	0.00731	LOC106508591; SRSF3
1.62	0.0109	NMRAL1		NMRAL1	NmrA like redox sensor 1	Nucleus	other
1.62	0.013	LOC100511737
1.62	0.0138	SOCS6		SOCS6	suppressor of cytokine signaling 6	Cytoplasm	other
1.62	0.0165	LOC100627707
1.62	0.0168	TAMM41		TAMM41	TAM41 mitochondrial translocator assembly and maintenance homolog	Cytoplasm	enzyme
1.62	0.0243	ASB13		ASB13	ankyrin repeat and SOCS box containing 13	Other	other
1.61	0.00857	GTF3C6		GTF3C6	general transcription factor IIIC subunit 6	Nucleus	transcription regulator
1.61	0.0108	LRPPRC		LRPPRC	leucine rich pentatricopeptide repeat containing	Cytoplasm	other
1.61	0.0124	MXD4		MXD4	MAX dimerization protein 4	Nucleus	transcription regulator
1.61	0.0225	SORBS2		SORBS2	sorbin and SH3 domain containing 2	Plasma Membrane	other
1.61	0.0233	PTPRG		PTPRG	protein tyrosine phosphatase, receptor type G	Plasma Membrane	phosphatase
1.61	0.034	TAC1		TAC1	tachykinin precursor 1	Extracellular Space	other	rolapitant
1.61	0.0372	TBC1D8		TBC1D8	TBC1 domain family member 8	Plasma Membrane	other
1.61	0.0431	PIP4K2A		PIP4K2A	phosphatidylinositol-5-phosphate 4-kinase type 2 alpha	Cytoplasm	kinase
1.61	0.0431	CD247		CD247	CD247 molecule	Plasma Membrane	transmembrane receptor	blinatumomab
1.6	0.00206	CCDC3		CCDC3	coiled-coil domain containing 3	Cytoplasm	other
1.6	0.00608	IFI35		IFI35	interferon induced protein 35	Nucleus	other
1.6	0.00624	RQCD1		CNOT9	CCR4-NOT transcription complex subunit 9	Cytoplasm	other
1.6	0.00832	C13H21orf91
1.6	0.0106	LOC100739755
1.6	0.0172	NCAPG		NCAPG	non-SMC condensin I complex subunit G	Nucleus	other
1.6	0.0247	INTS7		INTS7	integrator complex subunit 7	Nucleus	other
1.6	0.0251	LETM1		LETM1	leucine zipper and EF-hand containing transmembrane protein 1	Cytoplasm	other
1.6	0.0352	LOC100623290
1.6	0.0404	LOC100736946
1.59	0.00217	C2H1orf35
1.59	0.00402	LOC100518592
1.59	0.0059	LOC106505311; LOC106505312
1.59	0.00719	WWP2		WWP2	WW domain containing E3 ubiquitin protein ligase 2	Cytoplasm	enzyme
1.59	0.00824	GCLM		GCLM	glutamate-cysteine ligase modifier subunit	Cytoplasm	enzyme
1.59	0.0127	LOC100513338; LOC100525449
1.59	0.0153	INIP		INIP	INTS3 and NABP interacting protein	Nucleus	other
1.59	0.0327	NAT9		NAT9	N-acetyltransferase 9 (putative)	Other	other
1.59	0.0366	TIA1		TIA1	TIA1 cytotoxic granule associated RNA binding protein	Nucleus	other
1.59	0.0498	LOC100519726; LOC100624523
1.58	0.00841	SOCS4		SOCS4	suppressor of cytokine signaling 4	Cytoplasm	other
1.58	0.0105	APITD1		APITD1-CORT/CENPS	centromere protein S	Nucleus	other
1.58	0.02	TSTD2		TSTD2	thiosulfate sulfurtransferase like domain containing 2	Other	other
1.58	0.0243	AQP11		AQP11	aquaporin 11	Plasma Membrane	transporter
1.58	0.0263	POLR3A		POLR3A	RNA polymerase III subunit A	Nucleus	enzyme
1.58	0.0332	TSPAN17		TSPAN17	tetraspanin 17	Other	enzyme
1.58	0.0339	RPS25		RPS25	ribosomal protein S25	Cytoplasm	other
1.58	0.043	LOC106505882
1.58	0.0458	TRAPPC13		TRAPPC13	trafficking protein particle complex 13	Other	other
1.57	0.0108	ADAR		ADAR	adenosine deaminase, RNA specific	Nucleus	enzyme
1.57	0.0183	GLYR1	D	GLYR1	glyoxylate reductase 1 homolog	Other	other
1.57	0.0381	ADPGK		ADPGK	ADP dependent glucokinase	Plasma Membrane	kinase
1.57	0.0482	ENSA		ENSA	endosulfine alpha	Cytoplasm	transporter
1.56	0.00395	CDC27		CDC27	cell division cycle 27	Nucleus	other
1.56	0.00479	LOC100518088
1.56	0.0117	L3MBTL3		L3MBTL3	l(3)mbt-like 3 (Drosophila)	Nucleus	other
1.56	0.0154	MSL3		MSL3	male-specific lethal 3 homolog (Drosophila)	Nucleus	transcription regulator
1.56	0.02	LOC100739713; MSH2
1.56	0.0202	LOC100736666
1.56	0.0233	NOLC1		NOLC1	nucleolar and coiled-body phosphoprotein 1	Nucleus	transcription regulator
1.56	0.028	PNMA1	D	PNMA1	paraneoplastic Ma antigen 1	Nucleus	other
1.56	0.0368	CADM1		CADM1	cell adhesion molecule 1	Plasma Membrane	other
1.56	0.0371	CXADR	D	CXADR	coxsackie virus and adenovirus receptor	Plasma Membrane	transmembrane receptor
1.56	0.0416	LOC100519103
1.56	0.0456	LPAR6		LPAR6	lysophosphatidic acid receptor 6	Plasma Membrane	G-protein coupled receptor
1.56	0.0456	IKBKG		IKBKG	inhibitor of kappa light polypeptide gene enhancer in B-cells, kinase gamma	Nucleus	kinase
1.55	0.00032	FUCA1		FUCA1	fucosidase, alpha-L- 1, tissue	Cytoplasm	enzyme
1.55	0.00885	CCT6A		CCT6A	chaperonin containing TCP1 subunit 6A	Cytoplasm	other
1.55	0.0124	FGF18		FGF18	fibroblast growth factor 18	Extracellular Space	growth factor
1.55	0.0136	ENTPD5		ENTPD5	ectonucleoside triphosphate diphosphohydrolase 5	Cytoplasm	enzyme
1.55	0.0161	KIF3A		KIF3A	kinesin family member 3A	Cytoplasm	enzyme
1.55	0.0167	NAGPA		NAGPA	N-acetylglucosamine-1-phosphodiester alpha-N-acetylglucosaminidase	Cytoplasm	enzyme
1.55	0.0167	LTN1		LTN1	listerin E3 ubiquitin protein ligase 1	Nucleus	enzyme
1.55	0.021	LOC106504194
1.55	0.0269	IDE	D	IDE	insulin degrading enzyme	Extracellular Space	peptidase	bacitracin
1.55	0.028	TFDP1		TFDP1	transcription factor Dp-1	Nucleus	transcription regulator
1.55	0.0331	RCAN3		RCAN3	RCAN family member 3	Other	other
1.55	0.0342	TMX4		TMX4	thioredoxin related transmembrane protein 4	Cytoplasm	enzyme
1.55	0.0395	LOC100516259
1.54	0.00226	NFYC		NFYC	nuclear transcription factor Y subunit gamma	Nucleus	transcription regulator
1.54	0.0058	COMTD1		COMTD1	catechol-O-methyltransferase domain containing 1	Plasma Membrane	enzyme
1.54	0.0151	ZNF280D		ZNF280D	zinc finger protein 280D	Other	other
1.54	0.0165	EYA3		EYA3	EYA transcriptional coactivator and phosphatase 3	Nucleus	phosphatase
1.54	0.024	LOC397173
1.54	0.0266	MACF1		MACF1	microtubule-actin crosslinking factor 1	Cytoplasm	enzyme
1.54	0.0382	IDE	D	IDE	insulin degrading enzyme	Extracellular Space	peptidase	bacitracin
1.54	0.0415	MYC		MYC	v-myc avian myelocytomatosis viral oncogene homolog	Nucleus	transcription regulator
1.54	0.0452	IGF1		IGF1	insulin like growth factor 1	Extracellular Space	growth factor	BI 836845
1.53	0.00512	NFIB		NFIB	nuclear factor I B	Nucleus	transcription regulator
1.53	0.00594	IDE	D	IDE	insulin degrading enzyme	Extracellular Space	peptidase	bacitracin
1.53	0.00687	LOC100738793
1.53	0.0135	FUCT1; SLC35C1
1.53	0.0139	WDR70		WDR70	WD repeat domain 70	Other	other
1.53	0.0158	LOC100516442
1.53	0.0206	HEATR1		HEATR1	HEAT repeat containing 1	Nucleus	other
1.53	0.0217	SNRPF		SNRPF	small nuclear ribonucleoprotein polypeptide F	Nucleus	other
1.53	0.0225	LGR4		LGR4	leucine rich repeat containing G protein-coupled receptor 4	Plasma Membrane	transmembrane receptor
1.53	0.0263	SS18		SS18	SS18, nBAF chromatin remodeling complex subunit	Nucleus	transcription regulator
1.53	0.0267	MAT2B	D	MAT2B	methionine adenosyltransferase 2B	Cytoplasm	enzyme
1.53	0.0313	SPRED1		SPRED1	sprouty related EVH1 domain containing 1	Plasma Membrane	other
1.53	0.0386	KHK		KHK	ketohexokinase	Cytoplasm	kinase
1.53	0.0389	RASA1		RASA1	RAS p21 protein activator 1	Cytoplasm	transporter
1.53	0.0423	PHF12		PHF12	PHD finger protein 12	Nucleus	transcription regulator
1.53	0.0466	FBXW4		FBXW4	F-box and WD repeat domain containing 4	Other	other
1.53	0.05	FAM122A		FAM122A	family with sequence similarity 122A	Extracellular Space	other
1.52	0.000895	TRRAP		TRRAP	transformation/transcription domain associated protein	Nucleus	transcription regulator
1.52	0.00438	IFT122		IFT122	intraflagellar transport 122	Nucleus	other
1.52	0.00711	SELRC1		COA7	cytochrome c oxidase assembly factor 7 (putative)	Other	other
1.52	0.00843	GPATCH2		GPATCH2	G-patch domain containing 2	Other	other
1.52	0.00908	TCEB3		TCEB3	transcription elongation factor B subunit 3	Nucleus	transcription regulator
1.52	0.0105	ATAD2B		ATAD2B	ATPase family, AAA domain containing 2B	Nucleus	other
1.52	0.0153	ZNF32	D	ZNF32	zinc finger protein 32	Nucleus	other
1.52	0.024	SLC25A14		SLC25A14	solute carrier family 25 member 14	Cytoplasm	transporter
1.52	0.029	HLCS	D	HLCS	holocarboxylase synthetase	Cytoplasm	enzyme
1.52	0.0328	ARID2		ARID2	AT-rich interaction domain 2	Nucleus	transcription regulator
1.52	0.0356	ITIH3		ITIH3	inter-alpha-trypsin inhibitor heavy chain 3	Extracellular Space	other
1.52	0.0376	PNKP		PNKP	polynucleotide kinase 3'-phosphatase	Nucleus	kinase
1.52	0.0487	PPP6R2		PPP6R2	protein phosphatase 6 regulatory subunit 2	Cytoplasm	other
1.51	0.00358	BCLAF1		BCLAF1	BCL2 associated transcription factor 1	Nucleus	transcription regulator
1.51	0.00657	RRS1		RRS1	ribosome biogenesis regulator homolog	Nucleus	other
1.51	0.00823	C14H10orf99
1.51	0.00925	MTHFD1		MTHFD1	methylenetetrahydrofolate dehydrogenase, cyclohydrolase and formyltetrahydrofolate synthetase 1	Cytoplasm	enzyme
1.51	0.0105	PARP11		PARP11	poly(ADP-ribose) polymerase family member 11	Nucleus	enzyme
1.51	0.0135	TBC1D32		TBC1D32	TBC1 domain family member 32	Other	other
1.51	0.0201	PTPRK		PTPRK	protein tyrosine phosphatase, receptor type K	Plasma Membrane	phosphatase
1.51	0.0249	DBNDD1	D	DBNDD1	dysbindin domain containing 1	Other	other
1.51	0.0284	ENOPH1		ENOPH1	enolase-phosphatase 1	Cytoplasm	enzyme
1.51	0.0316	NSD1		NSD1	nuclear receptor binding SET domain protein 1	Nucleus	transcription regulator
1.51	0.0402	OAZ2		OAZ2	ornithine decarboxylase antizyme 2	Cytoplasm	other
1.51	0.0421	FAM188A		FAM188A	family with sequence similarity 188 member A	Nucleus	enzyme
1.51	0.0431	CCP110		CCP110	centriolar coiled-coil protein 110	Cytoplasm	other
1.51	0.0434	CLN6	D	CLN6	ceroid-lipofuscinosis, neuronal 6, late infantile, variant	Cytoplasm	other
1.51	0.047	OSBPL8		OSBPL8	oxysterol binding protein like 8	Plasma Membrane	transporter
1.51	0.0473	PARP9		PARP9	poly(ADP-ribose) polymerase family member 9	Nucleus	enzyme
1.51	0.0492	SNAI1		SNAI1	snail family transcriptional repressor 1	Nucleus	transcription regulator
1.51	0.0498	DLAT		DLAT	dihydrolipoamide S-acetyltransferase	Cytoplasm	enzyme
-1.51	0.00208	ARSA		ARSA	arylsulfatase A	Cytoplasm	enzyme
-1.51	0.00434	LRP1		LRP1	LDL receptor related protein 1	Plasma Membrane	transmembrane receptor	paclitaxel-angiopep-2 conjugate
-1.51	0.0114	SARAF		SARAF	store-operated calcium entry associated regulatory factor	Cytoplasm	other
-1.51	0.0174	C18H7orf55
-1.51	0.0189	HEATR5A		HEATR5A	HEAT repeat containing 5A	Other	other
-1.51	0.0326	CLK3		CLK3	CDC like kinase 3	Nucleus	kinase
-1.51	0.0399	COMMD9		COMMD9	COMM domain containing 9	Other	other
-1.51	0.0403	ANXA5		ANXA5	annexin A5	Plasma Membrane	transporter
-1.51	0.0411	EDEM1		EDEM1	ER degradation enhancing alpha-mannosidase like protein 1	Cytoplasm	enzyme
-1.51	0.0454	FYN		FYN	FYN proto-oncogene, Src family tyrosine kinase	Plasma Membrane	kinase	dasatinib, JNJ-26483327
-1.51	0.0467	CERCAM		CERCAM	cerebral endothelial cell adhesion molecule	Other	other
-1.52	0.00658	RBFA		RBFA	ribosome binding factor A (putative)	Cytoplasm	other
-1.52	0.00859	R3HDM4		R3HDM4	R3H domain containing 4	Other	other
-1.52	0.00861	LOC100739365
-1.52	0.0156	C6H1orf174
-1.52	0.0205	FAM134A		FAM134A	family with sequence similarity 134 member A	Other	other
-1.52	0.0423	MED15		MED15	mediator complex subunit 15	Nucleus	transcription regulator
-1.52	0.0453	TMEM86A		TMEM86A	transmembrane protein 86A	Other	other
-1.53	0.0084	SMOX		SMOX	spermine oxidase	Cytoplasm	enzyme
-1.53	0.00973	LOC100510904; LOC100737738
-1.53	0.0151	LGMN		LGMN	legumain	Cytoplasm	peptidase
-1.53	0.0174	ZFYVE1		ZFYVE1	zinc finger FYVE-type containing 1	Cytoplasm	other
-1.53	0.02	CBL		CBL	Cbl proto-oncogene	Nucleus	transcription regulator
-1.53	0.0281	DGUOK		DGUOK	deoxyguanosine kinase	Cytoplasm	kinase
-1.53	0.0367	PHYHD1		PHYHD1	phytanoyl-CoA dioxygenase domain containing 1	Other	other
-1.53	0.044	HYAL1		HYAL1	hyaluronoglucosaminidase 1	Cytoplasm	enzyme	hyaluronic acid, hylan, diclofenac/hyaluronic acid
-1.54	0.00314	RRAGC		RRAGC	Ras related GTP binding C	Cytoplasm	enzyme
-1.54	0.00491	PLBD2		PLBD2	phospholipase B domain containing 2	Extracellular Space	other
-1.54	0.00914	WDR26	D	WDR26	WD repeat domain 26	Cytoplasm	other
-1.54	0.0114	DCP1A		DCP1A	decapping mRNA 1A	Nucleus	other
-1.54	0.0138	PFKP		PFKP	phosphofructokinase, platelet	Cytoplasm	kinase
-1.54	0.0271	ZFP36		ZFP36	ZFP36 ring finger protein	Nucleus	transcription regulator
-1.54	0.0319	SIMC1		SIMC1	SUMO interacting motifs containing 1	Other	other
-1.54	0.0342	CAPG		CAPG	capping actin protein, gelsolin like	Nucleus	other
-1.54	0.0385	GAPDH		GAPDH	glyceraldehyde-3-phosphate dehydrogenase	Cytoplasm	enzyme
-1.55	0.000185	TOB1		TOB1	transducer of ERBB2, 1	Nucleus	transcription regulator
-1.55	0.0114	NPC2		NPC2	NPC intracellular cholesterol transporter 2	Extracellular Space	other
-1.55	0.0321	FAS		FAS	Fas cell surface death receptor	Plasma Membrane	transmembrane receptor
-1.55	0.0321	BNC1		BNC1	basonuclin 1	Nucleus	transcription regulator
-1.55	0.0355	AAK1	D	AAK1	AP2 associated kinase 1	Cytoplasm	kinase
-1.56	0.00344	MAF		MAF	MAF bZIP transcription factor	Nucleus	transcription regulator
-1.56	0.00537	TRIP6		TRIP6	thyroid hormone receptor interactor 6	Extracellular Space	cytokine
-1.56	0.0101	ENO2		ENO2	enolase 2	Cytoplasm	enzyme
-1.56	0.0114	CDH3		CDH3	cadherin 3	Plasma Membrane	other
-1.56	0.0116	ROCK2		ROCK2	Rho associated coiled-coil containing protein kinase 2	Cytoplasm	kinase
-1.56	0.0294	TOR1AIP2		TOR1AIP2	torsin 1A interacting protein 2	Cytoplasm	other
-1.56	0.0298	CYTH2		CYTH2	cytohesin 2	Cytoplasm	other
-1.56	0.0412	CYGB		CYGB	cytoglobin	Cytoplasm	transporter
-1.57	0.00113	LOC100158052
-1.57	0.00258	TCEA3		TCEA3	transcription elongation factor A3	Nucleus	transcription regulator
-1.57	0.0103	CDC42EP5		CDC42EP5	CDC42 effector protein 5	Cytoplasm	other
-1.57	0.0184	SLC16A3		SLC16A3	solute carrier family 16 member 3	Plasma Membrane	transporter
-1.58	0.00229	WBP2		WBP2	WW domain binding protein 2	Cytoplasm	transcription regulator
-1.58	0.00476	LOC100154269
-1.58	0.00682	LOC100157936; LOC102162592
-1.58	0.0184	RGS2		RGS2	regulator of G-protein signaling 2	Nucleus	other
-1.58	0.0207	HCFC2		HCFC2	host cell factor C2	Nucleus	transcription regulator
-1.58	0.0268	CRY2		CRY2	cryptochrome circadian clock 2	Nucleus	enzyme
-1.58	0.0302	ALKBH5		ALKBH5	alkB homolog 5, RNA demethylase	Nucleus	enzyme
-1.58	0.0333	LOC100519855
-1.58	0.0484	ZNF382		ZNF382	zinc finger protein 382	Nucleus	transcription regulator
-1.59	0.0017	LOC100515414
-1.59	0.00193	PHLDB2		PHLDB2	pleckstrin homology like domain family B member 2	Cytoplasm	other
-1.59	0.00735	MAP4K4		MAP4K4	mitogen-activated protein kinase kinase kinase kinase 4	Cytoplasm	kinase
-1.59	0.0116	UBE2F		UBE2F	ubiquitin conjugating enzyme E2 F (putative)	Cytoplasm	enzyme
-1.59	0.0181	IRF6		IRF6	interferon regulatory factor 6	Nucleus	transcription regulator
-1.59	0.0259	PFKFB3		PFKFB3	6-phosphofructo-2-kinase/fructose-2,6-biphosphatase 3	Cytoplasm	kinase	PFK-158
-1.59	0.0286	PCOLCE		PCOLCE	procollagen C-endopeptidase enhancer	Extracellular Space	other
-1.59	0.0336	LOC100622514
-1.59	0.038	AAK1	D	AAK1	AP2 associated kinase 1	Cytoplasm	kinase
-1.6	0.0015	DHRS1		DHRS1	dehydrogenase/reductase 1	Cytoplasm	enzyme
-1.6	0.00201	MEF2A		MEF2A	myocyte enhancer factor 2A	Nucleus	transcription regulator
-1.6	0.00222	GLRX		GLRX	glutaredoxin	Cytoplasm	enzyme
-1.6	0.00655	STIM1		STIM1	stromal interaction molecule 1	Plasma Membrane	ion channel
-1.6	0.00833	GAS7		GAS7	growth arrest specific 7	Cytoplasm	transcription regulator
-1.6	0.0195	LOC102159686
-1.6	0.0242	USP37		USP37	ubiquitin specific peptidase 37	Nucleus	peptidase
-1.6	0.0282	SESN2		SESN2	sestrin 2	Cytoplasm	enzyme
-1.6	0.0283	CRNKL1		CRNKL1	crooked neck pre-mRNA splicing factor 1	Nucleus	other
-1.6	0.0297	GGA2		GGA2	golgi associated, gamma adaptin ear containing, ARF binding protein 2	Cytoplasm	transporter
-1.61	0.0014	LOC100739126; NDEL1
-1.61	0.00834	ZER1		ZER1	zyg-11 related cell cycle regulator	Other	enzyme
-1.61	0.0231	PPP1R13L		PPP1R13L	protein phosphatase 1 regulatory subunit 13 like	Nucleus	transcription regulator
-1.61	0.0309	FAF2		FAF2	Fas associated factor family member 2	Cytoplasm	other
-1.61	0.0323	C18H7orf60
-1.62	0.0104	GSS	D	GSS	glutathione synthetase	Cytoplasm	enzyme	N-acetyl-L-cysteine
-1.62	0.012	CXCL14	D	CXCL14	C-X-C motif chemokine ligand 14	Extracellular Space	cytokine
-1.62	0.0122	PALLD		PALLD	palladin, cytoskeletal associated protein	Plasma Membrane	other
-1.62	0.0129	SOCS1		SOCS1	suppressor of cytokine signaling 1	Cytoplasm	other
-1.62	0.0152	WIPF2	D	WIPF2	WAS/WASL interacting protein family member 2	Cytoplasm	other
-1.62	0.0228	FBXL20		FBXL20	F-box and leucine rich repeat protein 20	Cytoplasm	other
-1.62	0.0345	LOC106509068
-1.63	0.00386	LOC100620996; UGP2
-1.63	0.0334	TMEM45A		TMEM45A	transmembrane protein 45A	Plasma Membrane	other
-1.63	0.0463	ABHD6		ABHD6	abhydrolase domain containing 6	Cytoplasm	enzyme
-1.64	0.00593	DESI2		DESI2	desumoylating isopeptidase 2	Cytoplasm	other
-1.64	0.00911	LOC100622791
-1.65	0.0102	PEG3	D	PEG3	paternally expressed 3	Nucleus	kinase
-1.65	0.0112	PQLC1		PQLC1	PQ loop repeat containing 1	Other	other
-1.65	0.0132	WLS		WLS	wntless Wnt ligand secretion mediator	Cytoplasm	other
-1.65	0.0177	OSBPL10		OSBPL10	oxysterol binding protein like 10	Other	other
-1.65	0.0302	COL6A1	D	COL6A1	collagen type VI alpha 1 chain	Extracellular Space	other	collagenase clostridium histolyticum
-1.65	0.0329	LOC102166840; LOC397344
-1.65	0.0395	WIPF2	D	WIPF2	WAS/WASL interacting protein family member 2	Cytoplasm	other
-1.65	0.0472	OAF		OAF	out at first homolog	Cytoplasm	other
-1.66	0.00756	PXK		PXK	PX domain containing serine/threonine kinase like	Cytoplasm	kinase
-1.66	0.00872	LOC100738337
-1.66	0.0118	LOC102160784
-1.66	0.0155	ANKRD46		ANKRD46	ankyrin repeat domain 46	Nucleus	transcription regulator
-1.66	0.0164	POLR1D		POLR1D	RNA polymerase I subunit D	Nucleus	enzyme
-1.67	0.00573	ABHD17C		ABHD17C	abhydrolase domain containing 17C	Other	enzyme
-1.67	0.0311	LOC396599
-1.68	0.00398	WDR33		WDR33	WD repeat domain 33	Nucleus	other
-1.68	0.00536	TPCN2		TPCN2	two pore segment channel 2	Cytoplasm	ion channel
-1.68	0.0137	PHLDA2		PHLDA2	pleckstrin homology like domain family A member 2	Cytoplasm	other
-1.68	0.0157	S100B		S100B	S100 calcium binding protein B	Cytoplasm	other
-1.68	0.0218	NUP54		NUP54	nucleoporin 54	Nucleus	transporter
-1.68	0.0385	LOC100515414
-1.68	0.0441	XPO7		XPO7	exportin 7	Nucleus	transporter
-1.68	0.0441	PATL1		PATL1	PAT1 homolog 1, processing body mRNA decay factor	Cytoplasm	translation regulator
-1.68	0.0489	GYS1		GYS1	glycogen synthase 1	Cytoplasm	enzyme
-1.69	6e-05	GADD45A		GADD45A	growth arrest and DNA damage inducible alpha	Nucleus	other
-1.69	0.00871	STAMBP		STAMBP	STAM binding protein	Nucleus	enzyme
-1.69	0.0299	ZMAT3		ZMAT3	zinc finger matrin-type 3	Nucleus	other
-1.69	0.0345	KIF1B		KIF1B	kinesin family member 1B	Cytoplasm	transporter
-1.69	0.0442	MTSS1		MTSS1	MTSS1, I-BAR domain containing	Cytoplasm	other
-1.7	0.00481	PEG3	D	PEG3	paternally expressed 3	Nucleus	kinase
-1.7	0.011	BHLHE40		BHLHE40	basic helix-loop-helix family member e40	Nucleus	transcription regulator
-1.71	0.000764	S100PBP		S100PBP	S100P binding protein	Nucleus	other
-1.71	0.00657	AIFM2		AIFM2	apoptosis inducing factor, mitochondria associated 2	Cytoplasm	enzyme
-1.71	0.012	LOC100152585
-1.71	0.0167	NR4A3		NR4A3	nuclear receptor subfamily 4 group A member 3	Nucleus	ligand-dependent nuclear receptor
-1.71	0.0236	PGM3		PGM3	phosphoglucomutase 3	Cytoplasm	enzyme
-1.71	0.0241	FADS6		FADS6	fatty acid desaturase 6	Other	enzyme
-1.71	0.0408	TJP2	D	TJP2	tight junction protein 2	Plasma Membrane	kinase
-1.71	0.044	WIPF2	D	WIPF2	WAS/WASL interacting protein family member 2	Cytoplasm	other
-1.71	0.0478	PPP1R3B	D	PPP1R3B	protein phosphatase 1 regulatory subunit 3B	Cytoplasm	other
-1.72	0.014	MAP3K9		MAP3K9	mitogen-activated protein kinase kinase kinase 9	Cytoplasm	kinase
-1.72	0.0309	RASSF1		RASSF1	Ras association domain family member 1	Nucleus	other
-1.72	0.0361	ANKRD44		ANKRD44	ankyrin repeat domain 44	Other	other
-1.72	0.037	HILPDA		HILPDA	hypoxia inducible lipid droplet associated	Cytoplasm	other
-1.72	0.0382	CYP19A1		CYP19A1	cytochrome P450 family 19 subfamily A member 1	Cytoplasm	enzyme	atamestane, everolimus/exemestane, lapatinib/letrozole, steroidal aromatase inhibitor, anastrozole/goserelin, letrozole/palbociclib, anastrozole/tamoxifen, fulvestrant/letrozole/tamoxifen, anastrozole/exemestane/fulvestrant, anastrozole/goserelin/tamoxifen, anastrozole/fulvestrant/tamoxifen, exemestane/fulvestrant, fulvestrant/letrozole, letrozole/tamoxifen, exemestane/tamoxifen, exemestane/fulve…
-1.72	0.0399	LOC100512285; LOC100738786
-1.73	0.00033	CRADD		CRADD	CASP2 and RIPK1 domain containing adaptor with death domain	Cytoplasm	other
-1.73	0.00831	GSS	D	GSS	glutathione synthetase	Cytoplasm	enzyme	N-acetyl-L-cysteine
-1.73	0.0143	MAFF		MAFF	MAF bZIP transcription factor F	Nucleus	transcription regulator
-1.73	0.022	TMEM248	D	TMEM248	transmembrane protein 248	Other	other
-1.73	0.0221	SLC37A4		SLC37A4	solute carrier family 37 member 4	Cytoplasm	transporter
-1.73	0.0417	STBD1		STBD1	starch binding domain 1	Cytoplasm	other
-1.73	0.0445	CDS2		CDS2	CDP-diacylglycerol synthase 2	Cytoplasm	enzyme
-1.74	0.00555	DUSP1		DUSP1	dual specificity phosphatase 1	Nucleus	phosphatase
-1.74	0.00964	SLC3A2		SLC3A2	solute carrier family 3 member 2	Plasma Membrane	transporter
-1.74	0.0335	FAM107B		FAM107B	family with sequence similarity 107 member B	Other	other
-1.75	0.00546	MRPS33		MRPS33	mitochondrial ribosomal protein S33	Cytoplasm	other
-1.75	0.0423	LOC100620348
-1.75	0.0488	PRKCZ		PRKCZ	protein kinase C zeta	Cytoplasm	kinase	pkc-zeta inhibitor, ingenol mebutate
-1.76	0.00552	RCAN1	D	RCAN1	regulator of calcineurin 1	Nucleus	transcription regulator
-1.76	0.0156	MXRA5		MXRA5	matrix remodeling associated 5	Extracellular Space	other
-1.76	0.0241	ZNF692		ZNF692	zinc finger protein 692	Other	other
-1.76	0.025	TMEM39A		TMEM39A	transmembrane protein 39A	Other	other
-1.77	0.0157	LOC100156167; PHGDH
-1.77	0.0263	DMAP1		DMAP1	DNA methyltransferase 1 associated protein 1	Nucleus	transcription regulator
-1.77	0.0316	TYMS	D	TYMS	thymidylate synthetase	Nucleus	enzyme	flucytosine, 5-fluorouracil, tegafur, trimethoprim, cyclophosphamide/epirubicin/5-fluorouracil, pralatrexate, tegafur/uracil, 5-fluorouracil/oxaliplatin, capecitabine/irinotecan, 5-fluorouracil/irinotecan, capecitabine/docetaxel, capecitabine/lapatinib, capecitabine/ixabepilone, bevacizumab/5-fluorouracil, bevacizumab/capecitabine/oxaliplatin, cyclophosphamide/docetaxel/epirubicin/5-fluorouracil/…
-1.77	0.0458	ITGA6		ITGA6	integrin subunit alpha 6	Plasma Membrane	transmembrane receptor
-1.78	0.0267	SLC27A1		SLC27A1	solute carrier family 27 member 1	Plasma Membrane	transporter
-1.78	0.0297	TPP1	D	TPP1	tripeptidyl peptidase 1	Cytoplasm	peptidase
-1.78	0.0299	KLF11		KLF11	Kruppel like factor 11	Nucleus	transcription regulator
-1.78	0.0326	EHF		EHF	ETS homologous factor	Nucleus	transcription regulator
-1.78	0.043	DEGS2		DEGS2	delta 4-desaturase, sphingolipid 2	Cytoplasm	enzyme
-1.79	0.00127	DDIT4		DDIT4	DNA damage inducible transcript 4	Cytoplasm	other
-1.79	0.0304	CDA		CDA	cytidine deaminase	Nucleus	enzyme	E7727, cytidine deaminase inhibitor
-1.8	0.00622	KDM5B; LOC102163404
-1.8	0.00624	ITGA2		ITGA2	integrin subunit alpha 2	Plasma Membrane	transmembrane receptor
-1.8	0.0205	LOC100519121; YIPF6
-1.8	0.0287	SMIM11A		SMIM11A	small integral membrane protein 11A	Plasma Membrane	other
-1.81	0.00526	RGS12		RGS12	regulator of G-protein signaling 12	Nucleus	other
-1.81	0.0198	CSRP2		CSRP2	cysteine and glycine rich protein 2	Nucleus	other
-1.81	0.0279	SH2B2		SH2B2	SH2B adaptor protein 2	Cytoplasm	other
-1.81	0.0412	FKBP10; LOC100736758
-1.82	0.00314	SLC2A3		SLC2A3	solute carrier family 2 member 3	Plasma Membrane	transporter
-1.82	0.00548	SAMD8		SAMD8	sterile alpha motif domain containing 8	Cytoplasm	enzyme
-1.83	0.0153	ZCCHC10		ZCCHC10	zinc finger CCHC-type containing 10	Other	other
-1.83	0.0231	GLT8D1		GLT8D1	glycosyltransferase 8 domain containing 1	Cytoplasm	enzyme
-1.83	0.0432	LOC100621244
-1.84	0.00537	FXYD6		FXYD6	FXYD domain containing ion transport regulator 6	Plasma Membrane	ion channel
-1.84	0.0054	PEG3	D	PEG3	paternally expressed 3	Nucleus	kinase
-1.84	0.0321	SRSF11		SRSF11	serine and arginine rich splicing factor 11	Nucleus	other
-1.84	0.0352	LOC102165673; LOC102166564
-1.85	0.0291	CDK5R1		CDK5R1	cyclin dependent kinase 5 regulatory subunit 1	Nucleus	kinase
-1.86	0.0258	TPST1		TPST1	tyrosylprotein sulfotransferase 1	Cytoplasm	enzyme
-1.87	0.000513	BNIP3		BNIP3	BCL2 interacting protein 3	Cytoplasm	other
-1.87	0.00687	BTG2		BTG2	BTG anti-proliferation factor 2	Nucleus	transcription regulator
-1.87	0.0084	RCAN1	D	RCAN1	regulator of calcineurin 1	Nucleus	transcription regulator
-1.87	0.0173	FAM193B		FAM193B	family with sequence similarity 193 member B	Nucleus	other
-1.87	0.0293	LRRC8C		LRRC8C	leucine rich repeat containing 8 family member C	Plasma Membrane	ion channel
-1.87	0.031	TJP2	D	TJP2	tight junction protein 2	Plasma Membrane	kinase
-1.88	0.0417	TRH		TRH	thyrotropin releasing hormone	Extracellular Space	other
-1.88	0.0466	TYMS	D	TYMS	thymidylate synthetase	Nucleus	enzyme	flucytosine, 5-fluorouracil, tegafur, trimethoprim, cyclophosphamide/epirubicin/5-fluorouracil, pralatrexate, tegafur/uracil, 5-fluorouracil/oxaliplatin, capecitabine/irinotecan, 5-fluorouracil/irinotecan, capecitabine/docetaxel, capecitabine/lapatinib, capecitabine/ixabepilone, bevacizumab/5-fluorouracil, bevacizumab/capecitabine/oxaliplatin, cyclophosphamide/docetaxel/epirubicin/5-fluorouracil/…
-1.89	0.00234	EIF4EBP1		EIF4EBP1	eukaryotic translation initiation factor 4E binding protein 1	Cytoplasm	translation regulator
-1.89	0.0153	COL6A3		COL6A3	collagen type VI alpha 3 chain	Extracellular Space	other	collagenase clostridium histolyticum
-1.89	0.0405	LOC100154420; LOC106508851
-1.9	0.00274	TMEM248	D	TMEM248	transmembrane protein 248	Other	other
-1.9	0.00715	LOC106508258
-1.9	0.0152	SLC19A2		SLC19A2	solute carrier family 19 member 2	Plasma Membrane	transporter
-1.9	0.0353	LOC100512723; LOC100514413; LOC100737129
-1.9	0.0354	CIDEA		CIDEA	cell death-inducing DFFA-like effector a	Cytoplasm	other
-1.9	0.0382	SCARA5		SCARA5	scavenger receptor class A member 5	Cytoplasm	other
-1.9	0.0388	EMILIN1		EMILIN1	elastin microfibril interfacer 1	Extracellular Space	other
-1.91	0.0415	ANTXR2		ANTXR2	anthrax toxin receptor 2	Plasma Membrane	transmembrane receptor
-1.91	0.0454	SLA-3
-1.92	0.00608	WDR26	D	WDR26	WD repeat domain 26	Cytoplasm	other
-1.92	0.0251	SF3B1		SF3B1	splicing factor 3b subunit 1	Nucleus	other
-1.93	0.027	ERO1A		ERO1A	endoplasmic reticulum oxidoreductase 1 alpha	Cytoplasm	enzyme
-1.95	0.00186	ARL4C		ARL4C	ADP ribosylation factor like GTPase 4C	Nucleus	enzyme
-1.95	0.0111	LOC100523971; LOC102165725
-1.95	0.0202	DPT		DPT	dermatopontin	Extracellular Space	other
-1.95	0.0211	DNAJB9	D	DNAJB9	DnaJ heat shock protein family (Hsp40) member B9	Nucleus	other
-1.95	0.0245	VLDLR		VLDLR	very low density lipoprotein receptor	Plasma Membrane	transporter
-1.95	0.0284	ANKRD37		ANKRD37	ankyrin repeat domain 37	Other	other
-1.96	0.008	METAP1		METAP1	methionyl aminopeptidase 1	Cytoplasm	peptidase
-1.97	0.00256	ADM		ADM	adrenomedullin	Extracellular Space	other
-1.97	0.00363	TPP1	D	TPP1	tripeptidyl peptidase 1	Cytoplasm	peptidase
-1.97	0.00909	METRNL		METRNL	meteorin like, glial cell differentiation regulator	Cytoplasm	other
-1.97	0.00951	TTC9		TTC9	tetratricopeptide repeat domain 9	Extracellular Space	other
-1.97	0.0115	RAB32		RAB32	RAB32, member RAS oncogene family	Cytoplasm	enzyme
-1.97	0.0267	RRAGD		RRAGD	Ras related GTP binding D	Cytoplasm	enzyme
-1.97	0.0282	LOC100621443
-1.97	0.0284	ZFP1		ZFP1	ZFP1 zinc finger protein	Nucleus	other
-1.98	0.0281	C1H9orf50
-1.98	0.0311	LOC100516260
-2	0.0025	PSD3		PSD3	pleckstrin and Sec7 domain containing 3	Cytoplasm	other
-2	0.00732	LOC100157056
-2	0.0157	MSC		MSC	musculin	Cytoplasm	transcription regulator
-2	0.0262	PACSIN2		PACSIN2	protein kinase C and casein kinase substrate in neurons 2	Cytoplasm	transporter
-2	0.0397	GPAT3		GPAT3	glycerol-3-phosphate acyltransferase 3	Cytoplasm	enzyme
-2	0.0427	STARD10		STARD10	StAR related lipid transfer domain containing 10	Cytoplasm	other
-2.01	0.00358	FAM151A		FAM151A	family with sequence similarity 151 member A	Extracellular Space	other
-2.01	0.00807	LOC100520621; TAP1
-2.04	0.00371	F2		F2	coagulation factor II, thrombin	Extracellular Space	peptidase	enoxaparin, desirudin, dabigatran etexilate, Fibrinogen, ximelagatran, thrombin inhibitor, antithrombin alfa, aspirin/dabigatran etexilate, dabigatran, ulinastatin, aspirin/bivalirudin, argatroban, bivalirudin, lepirudin
-2.04	0.0194	ZNF395		ZNF395	zinc finger protein 395	Cytoplasm	other
-2.04	0.0354	LOC100512980; LOC100523329
-2.05	0.0078	VSTM4		VSTM4	V-set and transmembrane domain containing 4	Other	other
-2.07	0.0327	SRGAP1		SRGAP1	SLIT-ROBO Rho GTPase activating protein 1	Cytoplasm	other
-2.09	0.0039	CDKN1A; LOC100623143
-2.09	0.00476	FOS		FOS	Fos proto-oncogene, AP-1 transcription factor subunit	Nucleus	transcription regulator
-2.12	0.0416	PLAU		PLAU	plasminogen activator, urokinase	Extracellular Space	peptidase
-2.17	0.0315	LAMC2		LAMC2	laminin subunit gamma 2	Extracellular Space	other
-2.18	0.0139	ARL4C; LOC100620419
-2.18	0.0295	EGLN1		EGLN1	egl-9 family hypoxia inducible factor 1	Cytoplasm	enzyme
-2.18	0.0435	PLOD1	D	PLOD1	procollagen-lysine,2-oxoglutarate 5-dioxygenase 1	Cytoplasm	enzyme
-2.2	0.0107	RRM2B	D	RRM2B	ribonucleotide reductase regulatory TP53 inducible subunit M2B	Nucleus	enzyme	bortezomib/cladribine/rituximab, cladribine/cytarabine/daunorubicin, cladribine/cytarabine/filgrastim, cladribine/cytarabine/filgrastim/mitoxantrone, cladribine/rituximab, cladribine/cytarabine/filgrastim/idarubicin, cladribine/cytarabine/filgrastim/idarubicin/plerixafor, cladribine/peginterferon alfa-2a, cladribine/cytarabine/decitabine, triapine, hydroxyurea, cladribine
-2.22	0.0145	COL6A1	D	COL6A1	collagen type VI alpha 1 chain	Extracellular Space	other	collagenase clostridium histolyticum
-2.25	0.00715	SLC2A1		SLC2A1	solute carrier family 2 member 1	Plasma Membrane	transporter
-2.26	0.0345	LOC595122
-2.29	0.00316	LOC100525830; LOC100526005
-2.3	0.00722	MGMT		MGMT	O-6-methylguanine-DNA methyltransferase	Nucleus	enzyme	O6-benzylguanine, O6-alkylguanine-DNA alkyltransferase inhibitor
-2.3	0.0144	ACSBG1		ACSBG1	acyl-CoA synthetase bubblegum family member 1	Cytoplasm	enzyme
-2.37	0.0163	PLOD1	D	PLOD1	procollagen-lysine,2-oxoglutarate 5-dioxygenase 1	Cytoplasm	enzyme
-2.37	0.0474	TSPAN9		TSPAN9	tetraspanin 9	Plasma Membrane	other
-2.39	0.000487	KCTD11	D	KCTD11	potassium channel tetramerization domain containing 11	Cytoplasm	other
-2.39	0.00609	TMCC3		TMCC3	transmembrane and coiled-coil domain family 3	Other	other
-2.4	0.00174	CXCL14	D	CXCL14	C-X-C motif chemokine ligand 14	Extracellular Space	cytokine
-2.41	0.00295	GSE1	D	GSE1	Gse1 coiled-coil protein	Extracellular Space	other
-2.42	0.00588	ICAM1; LOC100516245
-2.42	0.0177	HDAC4		HDAC4	histone deacetylase 4	Nucleus	transcription regulator	tributyrin, belinostat, pyroxamide
-2.45	0.0244	VEGFA		VEGFA	vascular endothelial growth factor A	Extracellular Space	growth factor	dalteparin, bevacizumab, ranibizumab, aflibercept, bevacizumab/erlotinib, bevacizumab/sorafenib, bevacizumab/5-fluorouracil, bevacizumab/temozolomide, bevacizumab/irinotecan, bevacizumab/carmustine/lomustine, bevacizumab/paclitaxel, bevacizumab/irinotecan/oxaliplatin, aflibercept/irinotecan, bevacizumab/capecitabine/oxaliplatin, bevacizumab/panitumumab, bevacizumab/cetuximab, bevacizumab/pemetrex…
-2.45	0.0318	PENK		PENK	proenkephalin	Extracellular Space	other
-2.46	0.0179	LOC100737169; VEGFA
-2.46	0.0427	ARG1; LOC106504070
-2.47	0.00839	TYMS	D	TYMS	thymidylate synthetase	Nucleus	enzyme	flucytosine, 5-fluorouracil, tegafur, trimethoprim, cyclophosphamide/epirubicin/5-fluorouracil, pralatrexate, tegafur/uracil, 5-fluorouracil/oxaliplatin, capecitabine/irinotecan, 5-fluorouracil/irinotecan, capecitabine/docetaxel, capecitabine/lapatinib, capecitabine/ixabepilone, bevacizumab/5-fluorouracil, bevacizumab/capecitabine/oxaliplatin, cyclophosphamide/docetaxel/epirubicin/5-fluorouracil/…
-2.48	0.00377	LOC106509886
-2.49	0.00164	PGF		PGF	placental growth factor	Extracellular Space	growth factor	aflibercept, aflibercept/irinotecan
-2.51	0.00721	RRM2B	D	RRM2B	ribonucleotide reductase regulatory TP53 inducible subunit M2B	Nucleus	enzyme	bortezomib/cladribine/rituximab, cladribine/cytarabine/daunorubicin, cladribine/cytarabine/filgrastim, cladribine/cytarabine/filgrastim/mitoxantrone, cladribine/rituximab, cladribine/cytarabine/filgrastim/idarubicin, cladribine/cytarabine/filgrastim/idarubicin/plerixafor, cladribine/peginterferon alfa-2a, cladribine/cytarabine/decitabine, triapine, hydroxyurea, cladribine
-2.53	0.0301	PTPRR		PTPRR	protein tyrosine phosphatase, receptor type R	Plasma Membrane	phosphatase
-2.54	0.0199	FAM26F		FAM26F	family with sequence similarity 26 member F	Other	other
-2.56	0.00741	DNAJC3		DNAJC3	DnaJ heat shock protein family (Hsp40) member C3	Cytoplasm	other
-2.56	0.0178	LOC100517674
-2.59	0.00868	ANPEP		ANPEP	alanyl aminopeptidase, membrane	Plasma Membrane	peptidase	CNGRC peptide-TNF alpha conjugate
-2.6	0.0142	LOC102162824
-2.62	0.0157	PPP1R3B	D	PPP1R3B	protein phosphatase 1 regulatory subunit 3B	Cytoplasm	other
-2.63	0.00632	NFIL3		NFIL3	nuclear factor, interleukin 3 regulated	Nucleus	transcription regulator
-2.66	0.02	LOC100739554; RRAGD
-2.69	0.0409	GSE1	D	GSE1	Gse1 coiled-coil protein	Extracellular Space	other
-2.69	0.0418	POU1F1	D	POU1F1	POU class 1 homeobox 1	Nucleus	transcription regulator
-2.7	0.0328	NELFA		NELFA	negative elongation factor complex member A	Nucleus	other
-2.71	0.00204	HTRA3		HTRA3	HtrA serine peptidase 3	Extracellular Space	peptidase
-2.73	0.0448	VWDE		VWDE	von Willebrand factor D and EGF domains	Other	other
-2.77	0.033	CYM
-2.78	0.0352	PRELID2		PRELID2	PRELI domain containing 2	Cytoplasm	other
-2.83	0.0453	PIPOX		PIPOX	pipecolic acid and sarcosine oxidase	Cytoplasm	enzyme
-2.96	0.00119	PHRF1		PHRF1	PHD and ring finger domains 1	Nucleus	other
-2.98	0.0011	KLF1		KLF1	Kruppel like factor 1	Nucleus	transcription regulator
-3.04	0.0395	GABBR2; LOC100511175
-3.05	0.0212	KCTD11	D	KCTD11	potassium channel tetramerization domain containing 11	Cytoplasm	other
-3.06	0.0238	KATNAL1		KATNAL1	katanin catalytic subunit A1 like 1	Cytoplasm	enzyme
-3.12	0.0157	DNAJB9	D	DNAJB9	DnaJ heat shock protein family (Hsp40) member B9	Nucleus	other
-3.14	0.0103	MOAP1		MOAP1	modulator of apoptosis 1	Cytoplasm	other
-3.15	0.00278	PTHLH		PTHLH	parathyroid hormone like hormone	Extracellular Space	other
-3.15	0.0396	IVL		IVL	involucrin	Cytoplasm	other
-3.17	0.0251	NOCT		NOCT	nocturnin	Nucleus	transcription regulator
-3.21	0.0226	LOC396789
-3.22	0.0115	MAMDC2		MAMDC2	MAM domain containing 2	Extracellular Space	other
-3.26	0.0444	IL10		IL10	interleukin 10	Extracellular Space	cytokine
-3.43	0.0388	HBEGF		HBEGF	heparin binding EGF like growth factor	Extracellular Space	growth factor
-3.45	0.0321	NPHS2		NPHS2	NPHS2, podocin	Plasma Membrane	other
-3.51	0.000319	QSOX1		QSOX1	quiescin sulfhydryl oxidase 1	Cytoplasm	enzyme
-3.51	0.0313	NMB		NMB	neuromedin B	Extracellular Space	other
-3.52	0.0203	LOC100514689; LOC106504115
-3.53	0.0182	LOC106507985
-3.55	0.039	FGG		FGG	fibrinogen gamma chain	Extracellular Space	other	F2
-3.64	0.034	LOC100152588
-3.69	0.0162	CA9		CA9	carbonic anhydrase 9	Nucleus	enzyme	girentuximab, I 131 chimeric G250, Y 90 chimeric G250, SLC-0111, DTP348, methazolamide, hydrochlorothiazide, acetazolamide, trichloromethiazide, chlorothiazide, chlorthalidone, benzthiazide, sulfacetamide, topiramate
-3.8	0.0169	PR39
-3.9	0.0247	SAR1B		SAR1B	secretion associated Ras related GTPase 1B	Cytoplasm	enzyme
-3.94	0.0284	FBLN7; LOC100517582
-3.99	0.0264	TNFSF13		TNFSF13	tumor necrosis factor superfamily member 13	Extracellular Space	cytokine
-4.07	0.0476	CYP1A1		CYP1A1	cytochrome P450 family 1 subfamily A member 1	Cytoplasm	enzyme
-4.35	0.00269	LRRC51		LRTOMT	leucine rich transmembrane and O-methyltransferase domain containing	Other	enzyme
-4.48	0.0269	LOC100627210; MYD88
-4.61	0.00638	LOC102159645
-4.72	0.0304	LOC106508216
-5.42	0.0201	SERPINB11		SERPINB11	serpin family B member 11 (gene/pseudogene)	Cytoplasm	other
-5.62	0.0238	AMBP		AMBP	alpha-1-microglobulin/bikunin precursor	Extracellular Space	transporter
-6.05	0.0176	LOC106507548; LOC106508822
-6.07	0.00182	PCSK2		PCSK2	proprotein convertase subtilisin/kexin type 2	Extracellular Space	peptidase
-7.28	0.0167	LOC100623656
-7.31	0.00801	SDCBP2		SDCBP2	syndecan binding protein 2	Cytoplasm	other
-8.68	0.0117	RALGDS		RALGDS	ral guanine nucleotide dissociation stimulator	Cytoplasm	other
-9.44	0.00303	ATP2B2		ATP2B2	ATPase plasma membrane Ca2+ transporting 2	Plasma Membrane	transporter
-10.24	0.0345	PCSK1		PCSK1	proprotein convertase subtilisin/kexin type 1	Cytoplasm	peptidase
-11.08	0.0305	CLDN2		CLDN2	claudin 2	Plasma Membrane	other
-21.48	0.0417	APOA4		APOA4	apolipoprotein A4	Extracellular Space	transporter
