# Supplementary material for: A porcine ex vivo model of pigmentary glaucoma
Source: Sci Rep. 2018 Apr 3;8:5468. doi: 10.1038/s41598-018-23861-x (PMC5882895; doi:10.1038/s41598-018-23861-x)
Supplement: Supplementary file 5 — Supplemental Table 3 [file 41598_2018_23861_MOESM5_ESM.xls]

## Sheet: Sheet0
© 2000-2016 QIAGEN. All rights reserved.
Upstream Regulator	Exp Fold Change	Molecule Type	Predicted Activation State	Activation z-score	Flags	p-value of overlap	Target molecules in dataset	Mechanistic Network
dexamethasone		chemical drug		0.539		2.04e-15	ACSL1,ADM,AKAP12,ALB,ALDOB,APOA4,ARL4C,B3GALNT1,BCLAF1,BNIP3,BTG2,CCL21,CCNA2,CD3E,CEBPA,COL6A1,CP,CXADR,CXCL12,CXCL14,CYP19A1,CYP1A1,DDIT4,DECR1,DESI2,DHRS1,DIO2,DNAJC3,DUSP1,EDEM1,EHF,ENC1,FASN,FGG,FLRT2,FOS,FXYD4,GADD45A,GAPDH,GAS1,GCLM,GHRHR,GLUL,HBEGF,HSPH1,IDE,IFI35,IFIT3,IFITM3,IFNG,IGF1,IGF1R,IL10,ITGA2,KDR,LEP,LHB,LRP1,LTB,MAF,MAT2A,MGMT,MTF2,MTHFD1,MXRA5,MYC,MYOD1,NFIL3,PCSK1,PCSK2,PENK…	280 (22)
TGFB1		growth factor	Activated	2.174		3.08e-15	ACSM3,ADAMTS3,ADM,ALB,ALOX15,AMD1,ANPEP,AQP11,ARL4A,BHLHE40,CALML4,CCNA2,CCT6A,CDH5,CEBPA,COL6A1,COL6A3,CSRP2,CXADR,CXCL12,DDIT4,DKC1,DLX2,DNMT1,DTX4,DUSP1,EGLN1,EMILIN1,ENPP1,FAS,FCER1A,FCGR1A,FLT1,FOS,FXYD6,FYN,GADD45A,GAS1,GAS7,GLDN,GRHL2,GSE1,HBEGF,HNMT,ID4,IFI16,IFIT3,IFNG,IGF1,IL10,INHA,ITGA6,ITIH3,IVL,KDR,KLRC4-KLRK1/KLRK1,KRT19,LEP,MAF,MEF2C,MGMT,MID1,MS4A2,MXD4,MYC,MYOD1,NFIB,NFYC,NR4A3,…	262 (15)
Vegf		group		-0.852		1.38e-13	AKAP12,ANPEP,BNC1,CD93,CDH5,CXCL12,CYYR1,DKC1,DNAJB9,EHF,FAS,FLT1,FXYD4,GPSM2,HBEGF,HELLS,ITGA2,ITGA6,ITGB8,KDR,KLF1,L3MBTL3,LPAR6,MEF2C,MID1,MYC,NEK2,NGB,NOLC1,NOTCH4,NR2F2,NR4A3,NRCAM,OSBPL10,PGF,PHLDA2,PLAU,PPAN,PTHLH,PTPRR,RCAN1,RGS2,SKP2,SLC19A2,SLCO2B1,TBC1D8,TPST1,VASH1,VEGFA	260 (20)
TP53		transcription regulator		1.747		1.87e-13	ACTL6A,AIFM2,ALB,ALOX15,BHLHE40,BNIP3,BTG2,CA9,CD247,CDH3,CEBPA,CP,CXCL12,CYP19A1,CYP1A1,DDIT4,DICER1,DNMT1,DUSP1,EMILIN1,ENSA,EXO1,FAS,FASN,FLRT2,FOS,FUCA1,GADD45A,GAPDH,GAS1,GLRX,GLUL,HBEGF,HSPH1,HYAL1,IFI16,IFI35,IFNG,IGF1,IGF1R,IL10,KCTD11,MGMT,MYC,NCK2,NEK2,NR2C1,NUDT5,PECAM1,PEG3,PLAU,POLD2,PPP1R13L,PRKCZ,RBL1,RGS12,RPS25,RRM2B,S100B,SESN1,SESN2,SLC19A2,SLC2A1,SLPI,SNAI1,SPHK1,SPTLC2,STAMBP…	239 (20)
lipopolysaccharide		chemical drug		1.926		2.22e-13	ABCB11,ACSL1,ADAR,ADM,ALB,ALOX15,ANXA5,ARL4C,BAG3,CCL21,CCL24,CD3E,CDH5,CDK5R1,CEBPA,COL6A1,CP,CXCL12,CXCL13,CXCL14,CYP1A1,DDIT4,DIO2,DMBT1,DNAJB9,DNMT1,DUSP1,EHF,EMB,ERO1A,F2,FAS,FASN,FLT1,FOS,FYN,GADD45A,GAS1,GHRHR,HBEGF,IFI16,IFI35,IFIT2,IFIT3,IFNG,IGF1,IL10,ITGA8,ITGB8,KDR,KIAA1551,LEP,LHB,LRP1,LRRFIP1,MAF,MAFF,MAP4K4,MXD4,MYC,NOCT,NPHS2,NR1I2,NR4A3,PCOLCE,PECAM1,PENK,PFKFB3,PHLDB2,PLAU,PLSCR…	258 (17)
IL1B		cytokine		1.813		6.37e-13	ABCB11,ADM,ALOX15,BTG2,CCL24,CEBPA,CP,CXCL12,CYP19A1,CYP1A1,DDIT4,DNMT1,DUSP1,EGLN1,EHF,ENPP1,FAS,FGF18,FGG,FLT1,FOS,GADD45A,GYS1,HBEGF,IFI16,IFNG,IGF1,IL10,ITGB8,KDR,KRT19,LAMC2,LEP,LHB,MEF2C,MYC,MYOD1,NFIL3,NMI,NOCT,PCSK1,PCSK2,PENK,PFKP,PLAU,PLSCR1,PTHLH,RCAN1,RRS1,RXRA,S100B,SESN1,SLC11A2,SLC2A1,SLC37A4,SOCS1,STAR,TAC1,TNFSF10,TOB1,TRH,VEGFA,ZFP36	232 (19)
HNF4A		transcription regulator		0.365		1.79e-12	A1CF,ABCB11,ABHD6,ALDOB,AMBP,ANPEP,ANXA5,AP1M1,APOA4,ARL4C,ATF6B,BCLAF1,BNC1,BRF2,CALML4,CCNA2,CCP110,CDC23,CEBPA,CLDN2,CNOT9,COA7,COMMD9,CRADD,CRYZL1,CXADR,CYTH2,DNAJB9,DTX3L,DYNC2LI1,EIF4G1,ENC1,ERO1A,EWSR1,EXO1,EXOSC2,FAM107B,FAS,FXYD6,GAPDH,GAS1,GPR39,GSS,HSPA4L,HSPH1,IFT122,IGF1,INTS7,IRF6,ISOC1,ITGA6,ITIH3,KIF1B,LPCAT3,LPGAT1,LRRC8C,LYRM4,MAT2A,MCCC1,MID1,MRPL32,MRPS23,MTF2,MTHFD1,MYC,NAA50…	126 (2)
TNF		cytokine	Activated	2.385		1.81e-12	ABCB11,ACSL1,ADM,AKAP12,ALB,ANPEP,ARHGDIB,BHLHE40,BTG2,CD247,CDC42EP5,CDH5,CDK5R1,CEBPA,CNP,CP,CRADD,CXCL12,CXCL13,CYP19A1,CYP1A1,CYYR1,DMBT1,DNMT1,DUSP1,EGLN1,EHF,ENTPD5,FAS,FASN,FGF18,FLT1,FOS,FYN,GADD45A,GCLM,GPAM,HBEGF,HSPA4,IDE,IFI16,IFIT3,IFNG,IGF1,IGF1R,IL10,INHA,ITGA6,KDR,L3MBTL3,LAMC2,LEP,LPAR6,LRRC8C,LTB,MAFF,MAP4K4,MAT2A,MEF2C,MGMT,MSC,MYC,MYOD1,NOCT,NOTCH4,NR1I2,NR4A3,OSBPL10,PECAM1,P…	293 (22)
L-triiodothyronine		chemical - endogenous mammalian	Inhibited	-2.227		2.07e-12	ACSL1,ADM,ALB,ARSA,CEBPA,CXCL12,CYP19A1,DIO2,DUSP1,F2,FAS,FASN,FOS,GHRHR,HR,IGF1,IGF1R,INHA,ITIH3,KIF1B,LEP,LRP1,MAMDC2,MYC,MYOD1,NFIB,PCSK2,POU1F1,PRKCZ,RBL1,RET,RGS2,SH2B2,SLC27A1,SSB,STAR,TRH	199 (22)
MYC	-1.54	transcription regulator		-0.269		7.77e-12	ADM,AKAP12,ALB,AMD1,ANXA5,CAST,CCNA2,CEBPA,CNP,COL6A3,CSRP2,DDIT4,DKC1,DNMT1,DROSHA,DUSP1,E2F3,EGLN1,EIF2S1,EIF4EBP1,EIF4G1,F2,FAS,FASN,FOS,GADD45A,GAPDH,GAS1,GCLM,GLUL,GLYR1,GTF2F2,IFI16,IFI35,IL10,IRF6,ITGA6,LEP,LGMN,MAT2A,METAP1,MTF2,MYC,NMI,NOCT,NOLC1,PECAM1,PEG3,PFKFB3,PFKP,PLAU,PLSCR1,ROCK2,RRS1,SCAMP5,SKP2,SLC16A3,SLC2A1,SLC2A3,SLC3A2,SYCP3,TFDP1,TOB1,TYMS,VEGFA,VLDLR,WLS,ZFP36	259 (25)
beta-estradiol		chemical - endogenous mammalian		0.186		4.45e-11	ACSL1,ACSM3,ACTL6A,ALB,ALOX15,ANPEP,APOA4,ART3,ATP2B2,BHLHE40,CAST,CCL21,CCNA2,CDK5R1,CEBPA,CNP,CP,CPT1C,CRNKL1,CXCL12,CXCL13,CYP19A1,CYP1A1,DGUOK,DNAJC3,DUSP1,E2F3,EIF2S1,FAS,FASN,FOS,FUCA1,GADD45A,GHRHR,HBB,HBEGF,HDAC4,HELLS,HSPA4,HSPH1,HTRA3,IDE,IFNG,IGF1,IGF1R,IKBKG,IL10,INHA,IRF6,ITGA2,KDR,KRT19,LEP,LHB,MEF2A,MXD4,MYC,MYOD1,NR4A3,OXT,PENK,PIK3R2,PLAU,POU1F1,PRKCZ,PTP4A2,RET,RGS2,SLC11A2,SLC2…	262 (23)
LY294002		chemical - kinase inhibitor		-0.05		6.02e-11	ACSM3,ANPEP,ART3,ATP2B2,BHLHE40,CA9,CCNA2,CDK5R1,CEBPA,CP,CYP19A1,DUSP1,FAS,FASN,FLT1,FOS,HBEGF,IDE,IFNG,IGF1,IGF1R,IL10,INHA,IVL,LAMC2,LEP,MEF2A,MEF2C,MYC,NPHS2,NR4A3,PLAU,RBL1,RGS2,SLC2A1,SNAI1,TAC1,VEGFA,ZFP36	209 (18)
HIF1A		transcription regulator	Activated	2.474		8.33e-11	ADM,ANKRD37,BHLHE40,BNIP3,CA9,CXCL12,EGLN1,ERO1A,FLT1,FOS,GAPDH,HILPDA,IFNG,IGF1,IL10,KRT19,LEP,MAFF,MEF2C,MGMT,MYC,NR4A3,PFKFB3,PGF,RASSF1,SLC2A1,SLC2A3,SNAI1,TAC1,TP53RK,VEGFA	192 (19)
PPARA		ligand-dependent nuclear receptor		0.792		1.17e-10	ACAT2,ACSL1,ACSL5,ALDOB,APOA4,CCNA2,CDS2,CEBPA,CIDEA,CXCL12,CYP1A1,DECR1,DIO2,FADS1,FASN,FGG,FOS,GLUL,GPAM,HILPDA,IFITM3,IFNG,IL10,KHK,LPCAT3,MAT2A,MGMT,MYC,NR1I2,OXT,SLC25A20,SLC27A1,SMC4,STBD1,STIM1,SYCP3,TOP2A,TPP1,VEGFA	198 (21)
ERBB2		kinase		0.519		1.78e-10	ABHD5,ADAM19,ATP1B3,BNIP3,BTG2,CDH3,COL6A1,COL6A3,CRADD,CXCL12,DECR1,DPT,EHF,EIF4EBP1,FASN,FLT1,GPAM,HBEGF,IFNG,IGF1R,IRF6,ITGA2,ITGA6,KDR,LPCAT1,LRRFIP1,MACF1,MAN1A1,MCCC1,MYC,NFIB,NPC2,PENK,PFKFB3,PQLC1,SKP2,SLC2A1,SLPI,SNAI1,SYCP3,TP53RK,VEGFA	215 (22)
JUN		transcription regulator		-0.681		2.36e-10	ACAT2,AKAP12,CCNA2,CD247,CDK5R1,CLDN2,CYGB,DICER1,DIO2,DNMT1,DROSHA,DUSP1,FAS,FOS,IFI16,IFNG,IGF1R,IL10,ITGB8,IVL,LHB,MAT2A,MYC,MYOD1,NRCAM,PCSK1,PENK,PLAU,PTHLH,RASA1,RXRA,SPHK1,STAR,STIM1,VEGFA,ZFP36	220 (18)
PTEN		phosphatase		-0.603		2.41e-10	ACSL1,ADM,BTG2,CDH5,CEBPA,CXCL13,DLAT,DUSP1,EIF4EBP1,FAS,FASN,FLT1,FOS,GYS1,ID4,IFNG,IGF1,IGF1R,IL10,KDR,KIF3A,KRT19,LRRFIP1,MAT2A,MXD4,MYC,NFIL3,PAPOLA,PFKFB3,PLOD1,POLD2,PTP4A2,PTPRK,SH2B2,SKP2,SMOX,SNRPF,TNFSF10,VEGFA	249 (22)
miR-124-3p (and other miRNAs w/seed AAGGCAC)		mature microrna		1.459	bias	2.59e-10	AAK1,ABHD5,ACSL1,ADAM19,ADGRF2,AK3,AMOT,ANKRD44,ANTXR2,ANXA5,ATAD2B,BMPR1B,BTG2,CADM1,CBL,CEBPA,CEP44,CLEC14A,CXADR,DCP1A,DESI2,DHRS1,DICER1,DLX2,DTX4,E2F3,EDEM1,EIF2S1,EMB,EYA3,FAF2,FAM122A,FAM57A,GAS1,GGA2,GPAM,GRHL2,GSS,GYS1,HDAC4,HEATR1,HRH1,IDE,INTS6,KCTD8,KIF1B,KIF3A,LPCAT3,MACF1,MAT2A,MCUR1,MEF2A,MID1,MRI1,MTAP,MXD4,MYCBP,MYO19,NCOA7,NFIA,NFIB,NR4A3,NRCAM,OAF,OSBPL10,OSBPL8,PALLD,PARP9,PEG…
miR-27a-3p (and other miRNAs w/seed UCACAGU)		mature microrna	Activated	2.969	bias	3.15e-10	A1CF,AAK1,ABHD17C,ABHD5,ABHD6,ADAM19,ADGRA3,AMD1,ANK3,ANTXR2,AQP11,ARID2,ARL4C,ATRN,BCLAF1,BNIP3,BTG2,CACYBP,CCNA2,CDC27,CDH5,CDK5R1,CDS2,CELF2,COA7,CSRP2,CXADR,DCP1A,DNAJB9,DNAJC3,DROSHA,DTX4,DYNC2LI1,EHF,ENC1,ENPP1,ERO1A,FAM193B,FAM65B,FAS,FBXL20,FLRT2,GLRX,GPAM,GSE1,HBEGF,HEATR5A,IFI16,IGF1,IL10,INIP,ITGA2,KCTD8,KIAA1551,KIAA1644,KIF3A,LEP,LFNG,LPAR6,LPCAT1,LPGAT1,MEF2C,MSL1,MYCBP,NAA50,NCOA7,…
STAT3		transcription regulator		0.594		3.18e-10	ALOX15,APOA4,CDH5,CEBPA,CLN6,CXCL12,DNMT1,FAM26F,FAS,FASN,FCGR1A,FGG,FOS,GADD45A,HBB,IFI16,IFI35,IFIT2,IFIT3,IFITM3,IFNG,IGF1R,IL10,KDR,KLRC4-KLRK1/KLRK1,MAF,MYC,PCSK1,PECAM1,RET,RNLS,SLC2A1,SNAI1,SOCS1,TFDP1,TNFSF10,TRH,VEGFA,ZFP36	199 (22)
miR-29b-3p (and other miRNAs w/seed AGCACCA)		mature microrna	Activated	2.923	bias	4.2e-10	ABHD5,ADAM19,AIFM2,AMOT,ANK3,ANTXR2,ANXA5,APITD1/APITD1-CORT,ARL4A,ATAD2B,ATRN,BTG2,CD93,CDC23,CELF2,COL6A3,DICER1,DIO2,DTX4,EIF2S1,EML4,FAM193B,FAM65B,FBXL20,FBXO41,FOS,GAS7,GPAM,GPATCH2,HBEGF,HDAC4,HN1,HRH1,IDE,IFITM3,IFNG,IGF1,IGSF1,ITGA6,KIAA1644,KIF3A,KLF11,LAMC2,LEP,LPGAT1,LUZP1,MAP4K4,MSL1,MSL3,MYOD1,NAA40,NANP,NASP,NFIA,NFIB,NMI,NSD1,NSFL1C,PEX3,PLEKHA8,PNPLA3,POLR1D,PTHLH,PTPRK,R3HDM4,SC…
cycloheximide		chemical reagent		1.45		4.83e-10	ADM,ALB,BTG2,CYP19A1,CYP1A1,DDIT4,DIO2,DUSP1,EIF4G1,FAS,FOS,GADD45A,GCLM,GHRHR,HBEGF,IFNG,IGF1,LEP,LHB,MYC,PFKFB3,PLAU,POU1F1,PTHLH,RCAN1,RGS2,RXRA,SLC2A1,STAR,TNFSF10,TOB1,VEGFA	255 (22)
miR-30c-5p (and other miRNAs w/seed GUAAACA)		mature microrna		1.358	bias	5.2e-10	A1CF,ADAM19,ADAMTS3,ADGRA3,ADPGK,ANPEP,ARL4A,ARL4C,ATAD2B,ATP2B2,ATRN,BNC1,CADM2,CALML4,CAMK2N2,CEP44,CNOT9,CYYR1,DCP1A,DDIT4,DESI2,DIO2,DNAJC3,E2F3,EML4,F2,FAF2,FBXL20,FUCA1,GRHL2,HCFC2,HTRA3,IDE,IGF1,IGF1R,IRAK1BP1,ITGA2,ITGA6,KIF3A,KLF11,LPGAT1,LRRC8C,LTN1,MAF,MAP4K4,MAT2A,MRI1,MXRA5,NAGPA,NFIA,NFIB,NR2F2,NSD1,OSBPL8,PAPOLA,PBRM1,PEX3,PGM3,PHLDB2,PIK3R2,PIP4K2A,PNMA1,POLR1D,PSD3,PTPRK,PXK,RAB3…
miR-291a-3p (and other miRNAs w/seed AAGUGCU)		mature microrna	Activated	3.017	bias	5.35e-10	A1CF,AAK1,ALDOB,ALKBH5,AP1M1,AREL1,ARL4A,ARL4C,ASB13,ATF6B,ATP2B2,BBIP1,BCLAF1,BNC1,CADM2,CCP110,CDC23,CELF2,CXCL12,CXCL14,E2F3,EGLN1,EIF2S1,ENTPD5,FAM155B,FAM57A,FBXO41,GPSM2,GRHL2,HCFC2,HDAC4,HN1,HOXD8,INTS6,ITGB8,KHK,MEF2C,METAP1,MSL1,MTCH2,MYO19,NCOA7,NFIA,NFIB,NR2C1,NR2F2,NR4A3,NRCAM,PAPOLA,PECAM1,PFKP,PHF12,PIP4K2A,PNPLA3,PSD3,RALGDS,RBL1,RBM25,RNLS,ROCK2,RRAGD,SAR1B,SCARA5,SPRED1,SPTLC2,ST…
miR-340-5p (miRNAs w/seed UAUAAAG)		mature microrna	Activated	2.37	bias	7.49e-10	AAK1,ABHD17C,ACSL1,ADGRF2,ADPGK,AK3,ANKRD10,ARL4A,ARL4C,CADM2,CAST,CDK5R1,CEP70,CRNKL1,CRY2,CWC22,CXADR,CXCL14,DDX42,DESI2,DIO2,DTX3L,DYNC2LI1,EDEM1,EIF2S1,ENC1,ENOPH1,EWSR1,FAM134A,FAM162B,FAM65B,FLRT2,GAS1,GAS7,GLUL,GRHL2,HDAC4,IDE,IFNG,IGF1,IGF1R,IL10,IRF2BP1,ITGA6,KCNE3,KIAA1644,LPCAT1,LRRC8C,LRRFIP1,LTN1,MACF1,MAF,MAFF,MAP4K4,MAT2A,MID1,NCOA7,NFIA,NFIB,NR2C1,NR4A3,ODF2L,PALLD,PCSK1,PCSK2,PGM…
OSM		cytokine		1.824		7.75e-10	ACSL5,ALB,ARL4A,ARL4C,BHLHE40,CCL24,CDA,CDH3,CEBPA,COL6A1,CXADR,CXCL12,CXCL13,CYP19A1,DNAJC3,EIF4EBP1,FASN,FOS,GAS7,GLUL,HBEGF,IFNG,IL10,LRRFIP1,MGMT,MOAP1,MSC,MYC,NMB,PFKFB3,PGF,PKIG,PLAU,PLLP,PTOV1,QSOX1,SLC16A3,SLPI,SOCS1,TOP2A,TRRAP,VEGFA	261 (22)
miR-125b-5p (and other miRNAs w/seed CCCUGAG)		mature microrna	Activated	2.601	bias	7.75e-10	ABHD6,ANKRD44,ANPEP,ANTXR2,AREL1,ASB13,BMPR1B,BTG2,CCNA2,CDH5,CDS2,CLN6,CXCL13,CYFIP2,CYP1A1,CYTH2,CYYR1,DCP1A,DDX42,DICER1,DPF2,DRAM2,DTX4,E2F3,EDEM1,EIF4EBP1,EMILIN1,ENPP1,FAM107B,FAM134A,FAM155B,FAM65B,FBXL20,FBXW4,GGA2,GPR39,GSS,IFNG,IKBKG,INTS7,KIAA1644,KRT19,LAMC2,LETM1,LFNG,LRTOMT,LUZP1,LYRM4,MAF,MAMDC2,MAN1A1,MAP3K9,MED15,METTL21A,MSL1,MXD4,NAA40,NAT9,NFIB,NIP7,NR2C1,NT5DC1,OAZ2,PAPOLA,PA…
SMARCA4		transcription regulator		-1.485		9.88e-10	ALB,CCNA2,CNP,CYP1A1,DLX2,FOS,GAPDH,HBB,HDAC4,IFI16,IFITM3,IFNG,MEF2C,MXD4,MYC,NPC2,NR2F2,RASSF1,SS18,STARD10,TNFSF10,TNFSF13,TYMS	211 (19)
miR-181a-5p (and other miRNAs w/seed ACAUUCA)		mature microrna		1.413	bias	1.03e-09	AAK1,ACSL1,ADM,AHCTF1,AK3,ANKRD44,ARID2,ATP2B2,BBIP1,BCLAF1,BHLHE40,CCP110,CDC27,CDS2,CEBPA,CXADR,DCP1A,DDIT4,DNAJC21,DNAJC3,EMB,ENPP1,EYA3,FAS,FBXO41,FLT1,FOS,GAS7,GLDN,GSE1,HOXA1,HRH1,ITGA2,ITGA6,ITGB8,KIF1B,KIF3A,LPCAT1,LPGAT1,LRRFIP1,LTN1,LUZP1,MAMDC2,MAP3K9,MAP4K4,MCUR1,MEF2A,METAP1,MTAP,MTF2,MYCBP,NAA50,NEK2,NELFA,NFIB,NOTCH4,NR4A3,OSBPL8,PARP11,PCSK1,PEG3,PLAU,PPP1R3B,PQLC1,RASSF1,RBM25,SH…
let-7a-5p (and other miRNAs w/seed GAGGUAG)		mature microrna		1.74	bias	1.3e-09	A1CF,AAK1,ABHD17C,AHCTF1,AMER3,AMOT,ANKRD46,ATAD2B,BRF2,BTG2,CAPG,CBL,CERCAM,COMMD9,CRY2,CYP19A1,DICER1,DNAJB9,DPF2,DTX3L,DTX4,DUSP1,DYNC2LI1,EMB,ERO1A,F2,FAS,FBXW4,GAS7,GHRHR,GLRX,GPAT3,GYS1,HBEGF,HCFC2,IGF1,IGF1R,IGSF1,IL10,ITGB8,KATNAL1,KIF1B,KRT19,LGR4,LPGAT1,LRIG3,LRRC20,LRRFIP1,LTN1,MAP4K4,MEF2C,MRPS33,MYC,MYCBP,NNT,NSD1,ODF2L,PLEKHA8,POLD2,POLR3A,PPP1R7,PQLC2,PTP4A2,RHPN2,RMI2,RRAGD,SLC35D…	154 (7)
Creb		group		1.493		1.49e-09	ADM,ANK3,ANTXR2,CEBPA,CYP19A1,DDX42,DUSP1,FAS,FOS,GTF2F2,IFI16,IFNG,IGF1,IL10,INHA,INTS7,IVL,LEP,NR4A3,PCOLCE,PENK,POU1F1,PTHLH,RGS2,STAR,TAC1,TIA1,TRH,VEGFA	216 (24)
progesterone		chemical - endogenous mammalian		1.125		3.05e-09	ACSL1,ADM,ALOX15,ARL4A,ART3,B3GALNT1,BHLHE40,CADM1,CCNA2,CP,CXCL12,CYP19A1,CYP1A1,DICER1,ENC1,ENPP1,FLT1,FOS,GPAM,HBEGF,IDE,IFNG,IGF1,IL10,INHA,ITGA2,KDR,LHB,MYC,NFIL3,OXT,PEG3,PFKFB3,SKP2,SLC27A1,SLC2A1,SLC2A3,SOCS1,SPHK1,TJP2,TNFSF10,VEGFA	271 (21)
miR-9-5p (and other miRNAs w/seed CUUUGGU)		mature microrna	Activated	2.526	bias	3.73e-09	AAK1,ADAMTS3,ADPGK,ARL4C,BCLAF1,BTG2,CBL,CDC23,CNP,DCP1A,DICER1,DIO2,DNAJC3,EMB,ENPP1,ENTPD5,FAF2,FAM107B,FAM155B,FBXL20,FLT1,FUCA1,GCLM,GLDN,GPAM,HCFC2,HDAC4,HLCS,ID4,IGF1,ITGA6,ITGA8,KIF1B,KLRC4-KLRK1/KLRK1,LAMC2,LEP,LRRC8C,MAB21L3,MAF,MEF2C,MRI1,MTAP,MTF2,MYCBP,MYO19,NAGPA,NCAPG,NCOA7,NFIA,NFIB,PBRM1,PCSK2,PEG3,PHLDB2,PLBD2,PSD3,PTPRK,RALGDS,RNF128,RXRA,S100PBP,S1PR3,SAMD8,SAR1B,SLC19A2,SLC1A1…
miR-3667-3p (miRNAs w/seed CCUUCCU)		mature microrna		0.939	bias	5.85e-09	ADPGK,AIFM2,AMOT,ANTXR2,ATP1B3,CACYBP,CALML4,CBL,CD93,CDC23,DLAT,DNAJC15,DNAJC3,DPT,DROSHA,ENSA,FAF2,FCGR1A,FXYD4,GADD45A,GAS7,HCFC2,KDR,LEP,LFNG,LRRFIP1,LUZP1,MAB21L3,MID1,MOAP1,MXD4,MXRA5,NAA50,NOCT,NR1I2,NR2F2,PALLD,PATL1,PCP4L1,PECAM1,PLEKHA8,PSD3,PTPRR,QSOX1,RALGDS,RBFA,RRM2B,SAR1B,SHE,SLC1A1,SNAI1,SNAPC5,STAMBP,TAC1,TCF21,TJP2,TMEM201,TOR1A,VEGFA,WDR33,WIPF2
miR-26a-5p (and other miRNAs w/seed UCAAGUA)		mature microrna		1.104	bias	8.73e-09	A1CF,AAK1,ABHD5,ADAM19,ADM,AMOT,ARID2,ARL4C,ART3,ATAD2B,BHLHE40,CDK5R1,CELF2,COMMD9,CRADD,CXADR,DNAJC21,EIF2S1,ENC1,EYA3,FPGT,HEATR5A,IGF1,ITGA6,ITGB8,KIAA1551,LETM1,LGR4,LPAR3,MAP10,MAP3K9,MAT2A,MCUR1,MEF2C,MYC,MYCBP,NAGPA,NIP7,NT5DC1,OAF,PALLD,PATL1,PECAM1,PFKFB3,PHLDB2,PLBD2,PSD3,S100PBP,SAMD8,SAR1B,SLC19A2,SLC1A1,SLC25A20,SLC2A3,SOCS6,SRGAP1,TBC1D32,TJP2,TMEM248,TMEM86A,TOB1,UBTF,USP37,WDR33,…
AGT		growth factor		0.535		1.05e-08	ACAT2,ADM,ALOX15,ANK3,ARID2,COL6A1,CP,CYP19A1,DUSP1,FASN,FCGR1A,FLT1,FOS,GSS,HBEGF,IGF1,IGF1R,ITGA2,LEP,MXD4,MYC,NOTCH4,OXT,PALLD,PGF,PLAU,PTHLH,RBL1,RCAN1,RGS2,SLC1A1,SLC2A1,SOCS1,STAR,VEGFA,WNK4,ZFP36	249 (21)
miR-17-5p (and other miRNAs w/seed AAAGUGC)		mature microrna		1.846	bias	1.14e-08	A1CF,AAK1,ABHD5,ADAR,AREL1,ARL4A,ARL4C,ATP2B2,BBIP1,CADM2,CAMK2N2,CDC23,CELF2,CEP70,CERCAM,CRY2,CXCL14,DNAJB9,E2F3,EGLN1,ENSA,FAF2,FAM134A,FAM57A,FBXO41,FLT1,GINS4,GLDN,GPATCH2,GRHL2,HDAC4,HN1,INTS6,ITGB8,KATNAL1,KLF11,L3MBTL3,LPGAT1,LRRC20,LUZP1,MAP10,MAP3K9,MAT2B,METAP1,MID1,MSL1,NFIB,NR2C1,NR4A3,PAPOLA,PFKFB3,PFKP,PIP4K2A,PLEKHA8,PPP1R3B,PPP6R2,PTHLH,PTP4A2,RBL1,RNF128,RRAGD,SAMD8,SAR1B,SCAMP5…
trichostatin A		chemical drug		-0.286		1.17e-08	AKAP12,CAST,CCNA2,CDC27,CEBPA,CXADR,CYP19A1,CYP1A1,DNMT1,DROSHA,DUSP1,FAS,FASN,FLT1,FOS,GADD45A,HBB,IFNG,IL10,KDR,MAT2A,MGMT,MYC,PENK,PLAU,SLC6A3,SOCS1,SPHK1,STAR,TNFSF10,TOP2A,TYMS,VEGFA	202 (21)
FOS	2.09	transcription regulator		-0.233		1.17e-08	ANK3,CADM1,CAST,CCNA2,CELF2,CLDN2,COL6A1,DIO2,DNMT1,EMB,FASN,FLRT2,FOS,GAS1,GPSM2,HOXA1,IFNG,IL10,ITGA6,IVL,KIF1B,LHB,LPCAT3,MAP4K4,MYC,NFIL3,NOTCH4,PENK,PLAU,PTP4A2,PXK,RXRA,SLPI,SNAI1,SPHK1,STAR,STIM1,TAC1,TPP1,VEGFA	199 (18)
HGF		growth factor		0.328		1.2e-08	AKAP12,BNC1,CD93,DKC1,EHF,FLT1,FOS,GPSM2,HBEGF,HELLS,IFNG,IL10,ITGA2,ITGA6,ITGB8,LAMC2,LGMN,MAT2A,MID1,MYC,NEK2,NOLC1,NR4A3,NRCAM,PGF,PHLDA2,PLAU,PPAN,PTHLH,PTPRR,RGS2,SKP2,SLC19A2,SNAI1,TBC1D8,VEGFA	222 (21)
rosiglitazone		chemical drug		1.351		1.37e-08	ACSL1,ACSL5,CEBPA,CIDEA,CYP19A1,CYP1A1,DECR1,DIO2,EGLN1,FASN,FOS,GAPDH,GPAM,IFIT2,IFNG,IGF1,IL10,KLF11,LEP,LFNG,LHB,LRP1,MAT2A,NCK2,PECAM1,PENK,RGS2,SKP2,SLC25A20,SLC27A1,SLC2A1,SNAI1,SOCS1,VEGFA,VLDLR	202 (21)
miR-344d-3p (and other miRNAs w/seed AUAUAAC)		mature microrna		1.625	bias	1.56e-08	ADM,ADPGK,AHCTF1,ANKRD44,ARID2,ATP2B2,BHLHE40,BTG2,CBL,CCNA2,CDS2,DIO2,DNAJB9,DTX4,ENSA,ERO1A,EYA3,FAM162B,FAM65B,FBXL20,FLT1,HBEGF,IGF1,IGF1R,KDR,LGR4,MAF,MEF2A,MEF2C,NFIA,NFIB,NR2F2,PBRM1,PCSK2,PNMA1,RRAGD,SAR1B,SCAMP5,SLC2A1,SNAI1,SNRPF,SPRED1,TCEB3,TOP2A,TSHZ2,UBTF,VEGFA,ZBTB7A,ZER1,ZFP36,ZFX
IL6		cytokine	Activated	2.198		1.67e-08	ABCB11,ALB,ANPEP,BTG2,CCL24,CCNA2,CEBPA,CLDN2,CXCL13,CYP19A1,CYP1A1,DNMT1,DUSP1,FAS,FCGR1A,FGG,FOS,GADD45A,GLRX,IFI16,IFITM3,IFNG,IGF1,IL10,KDR,LEP,MAF,MYC,NR1I2,PENK,PGF,PLAU,PPRC1,RASSF1,SMOX,SNAI1,SOCS1,TAC1,TNFRSF17,TNFSF10,VEGFA,VLDLR	248 (18)
miR-96-5p (and other miRNAs w/seed UUGGCAC)		mature microrna		1.957	bias	2.01e-08	ADAM19,AK3,ANKRD44,ANTXR2,AREL1,ARL4C,BMPR1B,CADM1,CADM2,CEBPA,CELF2,CXADR,CYYR1,DLAT,EDEM1,EEF1E1,EGLN1,EIF2S1,ERO1A,FADS1,FAF2,FAM188A,FAM57A,FBXO41,FLT1,FYN,GGA2,GRHL2,HBEGF,IGF1R,INIP,INTS6,IRF6,ITGA6,KIAA1324,LPAR6,LUZP1,MAF,MAFF,MAP4K4,MTAP,MTCH2,MTSS1,MYO19,NAA50,NAGPA,NR4A3,ODF2L,OSBPL10,PALLD,PFKFB3,PLEKHA8,PPP1R13L,RASA1,RCAN3,RET,RGS2,RHPN2,RNLS,S100PBP,SAR1B,SCARA5,SLC1A1,SPRED1,SRSF6…
E2F1		transcription regulator		-1.173		2.5e-08	ACSL5,BNIP3,CCNA2,CEBPA,CRADD,DNMT1,DUSP1,E2F3,EYA3,FAS,FLT1,FOS,HELLS,IFNG,IGF1,KDR,LEP,MAF,MTHFD1,MYC,NMI,OXT,RBL1,SLC3A2,SMC4,TOP2A,TYMS,VEGFA,VRK1,ZFP36	227 (20)
miR-182-5p (and other miRNAs w/seed UUGGCAA)		mature microrna	Activated	2.483	bias	2.53e-08	A1CF,AAK1,ADAM19,AK3,ANK3,ANKRD44,ANTXR2,AREL1,ARL4C,ATAD2B,BMPR1B,CADM1,CADM2,CDC27,CEBPA,CELF2,CXADR,DLAT,DNAJB9,DNAJC15,EGLN1,EIF2S1,EYA3,FAM122A,FAM188A,FBXO41,FLT1,GRHL2,HBEGF,IGF1R,INIP,INTS6,IRF6,ITGB8,KIAA1324,LRRC8C,LUZP1,MAF,MAP4K4,MEF2C,MFSD6L,MTAP,MTCH2,MTSS1,MYO19,NAGPA,NR4A3,NRCAM,NSD1,OSBPL10,PALLD,PGF,PLEKHA8,PPP1R13L,PTHLH,PTPRG,RALGDS,RASA1,RCAN3,RET,RHPN2,RNLS,S100PBP,SAR1B,SES…
GNAS		enzyme		1.949		2.54e-08	CEBPA,CYP19A1,FASN,FOS,LEP,LHB,MYC,PENK,POU1F1,PTHLH,STAR	215 (20)
thyroid hormone		chemical - endogenous mammalian		0.315		2.6e-08	ACSL5,ALDOB,APOA4,BTG2,CCNA2,CD2,DIO2,DNAJC3,FASN,FOS,HR,IGF1,INHA,KLF1,LEP,MYC,OXT,PCSK1,PIP4K2A,TCEA3,TFDP1,TRH	221 (20)
calcitriol		chemical drug	Activated	2.924		2.88e-08	ADAM19,ALB,APITD1/APITD1-CORT,CCNA2,CDK5R1,CEBPA,CYP19A1,CYP1A1,DUSP1,EHF,EXO1,FASN,FOS,GADD45A,GAPDH,IFNG,IGF1,IGF1R,IL10,LEP,MAF,MYC,NASP,NEK2,POU1F1,RXRA,SKP2,TCF19,TJP2,VEGFA	199 (19)
miR-92a-3p (and other miRNAs w/seed AUUGCAC)		mature microrna	Activated	3.186	bias	3.38e-08	A1CF,AAK1,ADAM19,ADGRF2,ADM,AIFM2,ANK3,ANKRD44,BTG2,CADM2,CCT6A,CDC27,CDK5R1,CEBPA,CELF2,CEP44,CXADR,DCP1A,DDIT4,DENND4B,DNAJB9,DUSP1,E2F3,EDEM1,EMB,GCLM,GLUL,GLYR1,HNMT,IFIT2,ITGA6,KIF1B,LRRC20,LUZP1,MAP10,MOAP1,MS4A2,MTF2,NAA50,NFIA,NFIB,NFYC,NR4A3,OSBPL8,PALLD,PEX3,PRSS12,PTPRK,RHPN2,SAR1B,SLC11A2,SLC2A3,SNAI1,SOCS6,STEAP4,TBC1D8,TCEB3,TCF21,TEX2,TIA1,TMCC3,TOB1,TOR1AIP2,TSTD2,TTC9,WDR81,WWP2,…
PD98059		chemical - kinase inhibitor		-0.759		4.16e-08	ACAT2,AKAP12,AMD1,ANPEP,BNIP3,CCNA2,CDH3,CDK5R1,CEBPA,CSTF1,CYP1A1,DIO2,DUSP1,E2F3,FASN,FOS,GAS7,HBEGF,IFNG,IGF1,IGF1R,IL10,ITGA2,KRT19,LEP,LHB,LPGAT1,MYC,MYOD1,PHLDA2,PLAU,PTHLH,SLC2A1,SLC3A2,SNAI1,STAR,TOP2A,VASH1,VEGFA	207 (20)
P38 MAPK		group		1.146	bias	4.46e-08	ANXA5,BNIP3,CEBPA,CXCL12,CYP19A1,CYP1A1,DIO2,DUSP1,FAS,FOS,IFNG,IL10,IRF6,ITGB8,IVL,LEP,MAP4K4,MEF2C,MYC,NR4A3,PLAU,RASA1,SNAI1,STIM1,TJP2,TNFSF10,VEGFA,VLDLR,ZFP36	208 (22)
miR-499-5p (and other miRNAs w/seed UAAGACU)		mature microrna	Activated	3.097	bias	4.83e-08	AAK1,AHCTF1,ANTXR2,APITD1/APITD1-CORT,ARID2,ATRN,CDC27,CELF2,CRYZL1,E2F3,EML4,ERO1A,FAM122A,FLRT2,GAS1,GLYR1,GPSM2,HLCS,INIP,KIAA1551,LGMN,LMCD1,LRRC8C,MAMDC2,MSL1,MYCBP,NDUFA5,NOCT,PARP9,PBRM1,PECAM1,PEG3,PHLDA2,PSD3,PTPRG,RCAN3,RET,SAMD8,SLC38A9,SOCS6,SPRED1,TMEM19,TMTC4,TSHZ2
CEBPA	-5.45	transcription regulator		0.099		5.01e-08	ACSL1,ALB,ANPEP,APOA4,ARL4C,CCNA2,CEBPA,CYP19A1,FASN,FCGR1A,FLT1,FOS,GADD45A,GAPDH,GAS1,GLRX,IGF1,IL10,IRF6,IVL,LEP,MYC,MYF6,MYOD1,NR1I2,RBL1,RGS2,STAR,TAC1,VLDLR	219 (20)
miR-1-3p (and other miRNAs w/seed GGAAUGU)		mature microrna	Activated	2.83	bias	5.75e-08	ADAR,ADGRA3,ADPGK,AKAP12,AMOT,ANPEP,ARID2,BBIP1,BMPR1B,BRF2,CBL,CEP44,DICER1,EML4,EYA3,F2,FAF2,FAIM,FAM107B,FAM134A,FAM155B,FAM57A,FBXL20,FBXO9,FPGT,GLYR1,HDAC4,IGF1,INTS6,LETM1,LRP1,MAF,MCAT,MEF2A,METTL21A,MTSS1,MXD4,NANP,NCK2,NR4A3,NRCAM,NSD1,ODF2L,OSBPL8,PARP11,PFKFB3,PIK3C2B,PPP1R3B,PTPRG,PTPRK,RASA1,RHPN2,RNF40,RRAGD,SAMD8,SLC16A3,SLC25A22,SPHK1,SPRED1,SS18,TAC1,TEX2,TSPAN9,VEGFA,WBP2,WIPF2,…
RB1		transcription regulator		-0.289		6.17e-08	BNIP3,CCNA2,CEBPA,CRADD,DIO2,DLAT,DNMT1,E2F3,FAS,FLT1,FOS,IGF1,IGF1R,IVL,KDR,MAF,MCAT,MECR,MEF2C,MRPS23,MYBPC1,MYC,NDUFA5,RBL1,TCAP,TYMS	209 (19)
Insulin		group		0.69		6.78e-08	ACSL1,ALB,ALDOB,CEBPA,CIDEA,CYP1A1,DDIT4,DUSP1,ERO1A,FADS1,FASN,FOS,IGF1,IGF1R,LEP,MTCH2,MYC,NFIL3,NR4A3,PFKFB3,PRKCZ,SLC2A1,SLC2A3,SLC37A4,SLC6A3,STAR,UBTF,VEGFA,VLDLR	226 (24)
miR-381-3p (and other miRNAs w/seed AUACAAG)		mature microrna	Activated	2.089	bias	7.23e-08	AAK1,AHCTF1,AIFM2,AKAP12,ANK3,ART3,ATP2B2,ATRN,BHLHE40,BMPR1B,BNC1,BRF2,CBL,CCNA2,CEBPA,CELF2,CWC22,DIO2,DLX2,EXO1,FAM107B,FBXL20,GAS1,HDAC4,HEATR5A,ID4,IGF1R,INTS6,IRAK1BP1,ITGA6,KCNE3,KIF1B,LGR4,LTN1,MAT2B,MEF2C,MTSS1,MYCBP,NASP,NFIA,NFIB,NR2F2,NSD1,OSBPL10,PAPOLA,PATL1,PCSK2,PENK,PFKFB3,RNF40,ROCK2,RRAGD,SLCO2B1,SNAI1,SOCS6,SPRED1,TMEM39A,TSHZ2,UBE2F,WDR26,WIPI1,WLS,XPO7,ZNF322
miR-625-5p (and other miRNAs w/seed GGGGGAA)		mature microrna	Activated	2.062	bias	7.59e-08	A1CF,ADAR,AHCTF1,AK3,AKAP12,ALKBH5,AMOT,ANTXR2,ARSA,ATAD2B,BCLAF1,CADM1,CADM2,CCDC3,CD3E,CLDN2,CXADR,CXCL12,CYP19A1,CYTH2,DCP1A,DDIT4,DENND4B,DESI2,DLAT,DNAJC15,EYA3,FAM155B,FAS,FBXL20,GAS1,GAS7,GLDN,GLYR1,GRHL2,GSS,GYS1,HR,IFIT2,IGF1,IGF1R,INIP,INTS6,KIAA1644,LETM1,LGR4,LPCAT3,LPGAT1,LRRC8C,LRTOMT,MAMDC2,MAP3K9,MAP4K4,MCUR1,MECR,MTAP,NAA40,NCOA7,NGB,NOL6,NOTCH4,NSD1,OXT,PAPOLA,PIK3R2,PIPOX,PLOD1…
PDGF BB		complex		1.118		7.78e-08	ACAT2,ADM,AKAP12,CP,CSRP2,EIF4G1,ENPP1,FASN,FLT1,FOS,GADD45A,GLUL,GSS,HBEGF,HDAC4,IGF1,IGF1R,MAT2A,MYC,NFIL3,NR4A3,PCOLCE,RGS2,SNAI1,SPHK1,VEGFA	204 (20)
ionomycin		chemical reagent		-0.308	bias	8.04e-08	DNMT1,DUSP1,EIF4EBP1,EIF4G1,ENPP1,FCGR1A,FGF18,FOS,HSPA4,IFNG,IL10,MAF,MYC,NFIL3,PRKCZ,PTPRK,RGS2,SLC3A2,TNFSF10	199 (21)
miR-3118 (and other miRNAs w/seed GUGACUG)		mature microrna	Activated	2.673	bias	9.08e-08	ABI3,ACSBG1,ACSL1,ADGRF2,ATP2B2,CELF2,CLN6,COA7,DBNDD1,EGLN1,EML4,FAM171B,FAM57A,FCRL5,GLDN,GPAT3,HNMT,IKBKG,INTS6,INTS7,ITGB8,LAMC2,LPCAT1,LUZP1,MAT2A,MS4A2,MXRA5,NAA40,NAA50,NCAPG,NDUFAF6,NPHS2,NRCAM,PARP9,PCP4L1,PCSK1,PGM3,PLEKHA8,PPP1R7,PSD3,SPTLC2,STBD1,TCF21,TIA1,TMEM248,TOR1AIP2,TSPAN17,VSTM4,WLS
SP1		transcription regulator		1.112	bias	9.13e-08	ACSL1,AKAP12,CEBPA,CXCL12,CYP19A1,FASN,FOS,GSS,HBB,HDAC4,ID4,IFITM3,IFNG,IGF1,IGF1R,IL10,ITGA2,KDR,KLF1,KRT19,LHB,MAT2A,MYC,PENK,PLAU,RNLS,SLC11A2,SLC2A1,SLC2A3,SOCS1,STAR,TRH,TYMS,VEGFA	231 (20)
miR-24-3p (and other miRNAs w/seed GGCUCAG)		mature microrna		1.582	bias	9.42e-08	AAK1,ADAM19,ADM,ADPGK,AMER3,ANK3,ANKRD44,AREL1,ARID2,ARSA,ATAD2B,BMPR1B,CCNA2,CD3E,CDS2,CELF2,CIDEA,COA7,CRY2,CXADR,CYTH2,DBNDD1,DENND4B,EML4,FADS6,FAM107B,FBXW4,FXYD6,GAS7,GGA2,GPAT3,GSE1,HELLS,HR,HRH1,HTRA3,HYAL1,IFNG,KCNE3,KIAA1644,LFNG,LPAR6,LRRC20,LYRM4,MAP3K9,MECR,MEF2A,MYC,PGM3,PLEKHA8,PTHLH,PXK,QPCTL,QSOX1,RASA1,RBL1,RNF40,RPS19BP1,S100B,S1PR5,SCAMP5,SESN1,SLC19A2,SLC35F2,SOCS4,STAMBP,TME…
PRKAG3		other				9.7e-08	AMD1,BTG2,CD93,CDH5,CELF2,DLAT,FBXO9,FXYD6,GLRX,HN1,ITGA6,LEP,LMCD1,MAT2A,MYOD1,PEG3,RNF128,SLC2A1,SLC2A3,ZFP36
CREB1		transcription regulator		0.145		1.17e-07	ADM,AQP11,BAG3,BHLHE40,BNIP3,BTG2,CCNA2,CDA,CSRP2,CYFIP2,CYP19A1,DIO2,DUSP1,FAM188A,FAM65B,FASN,FLT1,FOS,GADD45A,HN1,HSPA4,IFNG,INHA,LEP,MTSS1,MYC,NFIL3,NPC2,OXT,PCSK1,PENK,PTPRR,S1PR3,SLC2A3,STAR,TAC1,TRH,VEGFA,ZFP36	247 (21)
miR-4267 (miRNAs w/seed CCAGCUC)		mature microrna		1.491	bias	1.18e-07	ABI3,ACSL5,AMOT,BCLAF1,BHLHE40,BTG2,CDK5R1,CEP44,CNP,COG8,COL6A1,CPT1C,CXCL12,CYTH2,DDIT4,DDX42,DGUOK,DPT,EYA3,FADS6,FAM107B,FOS,GLRX,GPATCH4,HDAC4,IGSF1,IKBKG,IRF6,LEP,LGR4,LYRM4,MAB21L3,MAFF,MSL3,NAT9,NFIA,NFIL3,NGB,PACSIN2,PARP9,PEX12,PIK3R2,PLAU,PLEKHA8,PPP1R3B,RET,RPS19BP1,RRAGD,S1PR3,SCAMP5,SESN2,SLCO2B1,STAMBP,STEAP4,TCF19,TEX2,TMEM86A,TRUB2,TSPAN17,TSPAN9,ZNF692
miR-4641 (miRNAs w/seed GCCCAUG)		mature microrna	Activated	3.512	bias	1.31e-07	A1CF,ABHD6,ADPGK,AK3,ANKRD10,ANKS3,ARL4A,ARSA,ASB13,B3GALNT1,CBL,CEP44,COMMD9,DLAT,DNAJC21,ENPP1,ENSA,FBXO41,FBXO9,FLT1,FXYD6,GRHL2,HELLS,IGF1R,ITIH3,KLRC4-KLRK1/KLRK1,LPAR3,MAB21L3,MTAP,MTF2,MYCBP,NEK2,NFIB,NSD1,NT5DC1,PATL1,PQLC1,RALGDS,RBFA,RCAN1,SCARA5,TAC1,TBPL1,TCF19,TEX2,TFDP1,TMX4,TOP2A,TTC9,YLPM1,ZDHHC14
miR-101-3p (and other miRNAs w/seed ACAGUAC)		mature microrna	Activated	2.346	bias	1.5e-07	ABHD17C,ADAM19,ADAMTS3,ANK3,ANKRD44,ANTXR2,ARID2,ATAD2B,ATP2B2,BMPR1B,CADM1,CADM2,CDH5,CDK5R1,CDS2,CEBPA,CSRP2,CXADR,CXCL12,DDIT4,DESI2,DNAJC15,DNAJC21,DUSP1,ENSA,FLRT2,FOS,GPAM,GSE1,HN1,HTRA3,ID4,ITGB8,KIF1B,KIF3A,LRPPRC,MAB21L3,MAP10,MEF2A,METAP1,MXRA5,NFIB,NR2F2,NR4A3,NRCAM,NSD1,PBRM1,PIK3C2B,PSD3,RBM25,SLC19A2,SLC1A1,SPRED1,SRGAP1,STAMBP,STAR,STARD8,TEX2,TIA1,TMEM201,TMEM45A,TSHZ2,TXNDC15,UBE…
tretinoin		chemical - endogenous mammalian		-1.474		1.61e-07	ACSL1,AKAP12,ANXA5,BMPR1B,CDH5,CDK5R1,CEBPA,CIDEA,CP,CYP1A1,DIO2,DUSP1,EIF4G1,FOS,GHRHR,HBEGF,HOXA1,IFIT3,IFNG,IGF1R,IL10,ITGA6,IVL,KDR,KIF1B,KLF1,KRT19,MID1,MSC,MXD4,MYC,MYOD1,NPHS2,NR2C1,NR2F2,OXT,PENK,PLAU,PTHLH,RBL1,RET,RXRA,SKP2,SMOX,SOCS1,STAR,SYCP3,TAC1,TNFSF10,TOP2A,TPP1,TRH,VEGFA,ZBTB7A	242 (20)
Cg		complex		-0.039		1.84e-07	ACSL1,ADM,BHLHE40,BTG2,CD93,CEBPA,CYP19A1,DPT,DUSP1,EMB,FAS,FYN,GAS1,IFIT3,IFNG,IGF1,IGF1R,IL10,INHA,KHK,MAF,OXT,PECAM1,PFKFB3,PLAU,RGS2,STAR,TAC1,TIPIN,VEGFA	241 (21)
EGF		growth factor		0.911		1.87e-07	ANPEP,BTG2,CLDN2,CXCL13,CXCL14,CYP1A1,DIO2,DUSP1,FASN,FLT1,FOS,GADD45A,GAS1,HBEGF,IGF1,IGF1R,IL10,KCTD11,KRT19,MYC,NR4A3,PGF,PHLDA2,PLAU,PLSCR1,PTHLH,RXRA,SPHK1,STAR,TRH,VEGFA,ZFP36	269 (22)
PPARG		ligand-dependent nuclear receptor		0.66		1.9e-07	ACSL1,ACSL5,CEBPA,CIDEA,CXCL14,CYP19A1,DLAT,EGLN1,EIF4EBP1,ENO2,ERO1A,FASN,GAPDH,GPAM,HR,IFNG,IGF1,IL10,KLF11,LEP,MYF6,MYOD1,NDUFA5,NR2F2,PECAM1,PFKFB3,SLC25A20,SLC27A1,SLC2A1,SOCS1,STIM1,TNFSF10,VEGFA,VLDLR	213 (21)
IL4		cytokine		1.095		1.92e-07	ACSL1,ADAM19,ALOX15,BHLHE40,BNIP3,CAPG,CCL24,CD2,CELF2,COL6A3,DDX42,DECR1,EBNA1BP2,EGLN1,EIF2S1,FAS,FLRT2,FLT1,FOS,HRH1,IDE,IFI16,IFIT3,IFNG,IGF1,IGF1R,IL10,ITGA2,KIF3A,LFNG,LRRC8C,LTB,MAF,METAP1,MS4A2,MYC,MYOD1,NFIL3,NOCT,PFKP,PLAU,PLSCR1,PTHLH,SLC2A1,SOCS1,SPHK1,TNFRSF17,VEGFA,XPO7,ZFP36	225 (14)
miR-132-3p (and other miRNAs w/seed AACAGUC)		mature microrna	Activated	2.588	bias	2e-07	ABHD5,AMD1,AMOT,ARID2,BTG2,DESI2,FBXL20,HBEGF,HCFC2,HN1,IFNG,INTS6,IRF6,KIAA1644,L3MBTL3,LGR4,LRRFIP1,MAF,MAMDC2,MEF2A,MSL3,MTF2,NDUFA5,NDUFAF6,NFIB,NRCAM,OSBPL8,PAPOLA,PARP11,PHF12,PLLP,PNPLA3,PPRC1,RASA1,RRS1,SLC25A20,SLC2A1,SLC6A3,SPRED1,SRGAP1,SS18,TFDP1,TIA1,TJP2,TSHZ2,WDR33,ZFX,ZFYVE1,ZMAT3,ZNF395
miR-377-3p (miRNAs w/seed UCACACA)		mature microrna	Activated	2.527	bias	2.26e-07	AAK1,AHCTF1,AMER3,ANKRD10,APITD1/APITD1-CORT,B3GALNT1,BBIP1,CAMK2N2,CBL,CELF2,DCP1A,DNAJB9,DTX3L,EML4,ENC1,FAM134A,GLYR1,HCFC2,HEATR5A,IDE,IFIT2,IGF1,ITGA6,KIAA1644,LRPPRC,MACF1,MAP10,MAT2B,MCUR1,METAP1,MTF2,MYCBP,NELFA,NFIB,NNT,NR2F2,NSD1,OAZ2,OSBPL8,PEX3,PFKFB3,PGM3,PHACTR1,PKIG,POLR3A,RASA1,RET,RGS2,RRM2B,SARAF,SCARA5,SHE,SLC11A2,SOCS6,SPRED1,SRSF11,STIM1,TIA1,TMCC3,TMEM201,TOP2A,USP37,VEGFA,X…
miR-1226-3p (miRNAs w/seed CACCAGC)		mature microrna		1.183	bias	2.33e-07	ADPGK,AMER3,B3GALNT1,BUB3,CAST,CDH5,CDS2,COL6A1,COL6A3,CYTH2,DKC1,DNAJC21,EDEM1,EYA3,FOS,FPGT,FXYD6,GAS7,HN1,HOXD3,KATNAL1,KCNE3,KIAA1644,KIF1B,LETM1,LRRC8C,LYRM4,MAB21L3,MAP4K4,MAT2A,MCAT,MCUR1,NAA50,NDUFA5,NFIA,PALLD,PCP4L1,PLAU,PLBD2,PLEKHA8,PLLP,PPP1R3B,RASA1,RGS12,SNAPC5,TJP2,TPCN2,TTC9,VASH1,VSTM4,WBP2,WWP2,ZNF280D,ZNF322
APP		other		0.269		2.43e-07	ALB,ATP2B2,CALML4,CAST,CDC27,CDH3,CDH5,CDK5R1,CP,CXCL12,CYFIP2,ENO2,ENSA,FBXL20,FCGR1A,FOS,FYN,GAPDH,HEATR5A,IDE,IFI16,IFI35,IFIT2,IFNG,IGF1,IGF1R,IKBKG,IL10,ITGA2,ITGA6,KCNE3,LPAR6,LRP1,MAF,MAFF,MEF2C,MYC,NDUFA5,PENK,PFKFB3,PFKP,PLAU,RBL1,RCAN1,S100B,SLC11A2,SOCS1,TCF21,TNFSF10,TOP2A,TPP1,VEGFA,ZDHHC14	237 (19)
miR-21-5p (and other miRNAs w/seed AGCUUAU)		mature microrna	Activated	3.889	bias	2.55e-07	AKAP12,ANKRD46,BTG2,CADM1,CADM2,CDH5,DLX2,DNAJB9,EGLN1,FAM107B,FAS,FGF18,GLDN,GLYR1,GRHL2,HNMT,IFNG,INTS6,IRAK1BP1,ITGB8,KDR,LRRFIP1,MAP10,MEF2C,MSL1,MTAP,NCAPG,NFIA,NFIB,NR2C1,PBRM1,PECAM1,PLEKHA8,PPP1R3B,PTPRG,RASA1,SESN1,SLC2A1,SOCS6,TCF21,TMEM39A,WWP1,ZNHIT6	107 (7)
miR-3140-3p (miRNAs w/seed GCUUUUG)		mature microrna		1.413	bias	2.66e-07	ADAMTS3,ALB,ARL4A,CAST,CSTF1,CWC22,CYP19A1,DNAJC21,EGLN1,EMB,FAM57A,GINS4,HSPH1,IRF2BP1,MAB21L3,NNT,NUP54,PPP1R3B,PTP4A2,RGS2,SARAF,SLC2A1,TJP2,TMEM144,TMEM201,TRAPPC13,TSPAN9,TSTD2,WDR26,ZER1
COMMD1		transporter		-1.89	bias	2.67e-07	BNIP3,DDIT4,EGLN1,IFNG,KRT19,PFKFB3,PFKP,VEGFA	159 (12)
salirasib		chemical drug	Inhibited	-2.714		2.74e-07	ADM,BHLHE40,BNIP3,CA9,ENO2,PFKFB3,PLAU,PLOD1,SLC2A1,TJP2,VEGFA	194 (17)
IFNG	-5.13	cytokine		-0.485		2.91e-07	ADM,ALOX15,AQP11,CCNA2,CD2,CDK5R1,CEBPA,CP,CXADR,CXCL12,DUSP1,EHF,FAM26F,FAS,FASN,FCGR1A,FGG,FLRT2,FLT1,FOS,GLDN,GLUL,HBEGF,IDE,IFI16,IFI35,IFIT2,IFIT3,IFITM3,IFNG,IGF1,IGF1R,IL10,ITGA6,KDR,KLRC4-KLRK1/KLRK1,KRT19,LAMC2,LEP,LTB,MYC,MYOD1,NMI,PCSK1,PCSK2,PECAM1,PENK,PHACTR1,PLAU,PTHLH,S1PR3,SLC11A2,SLC2A1,SLC37A4,SLPI,SOCS1,STAR,TAC1,TNFSF10,TNFSF13,TRH,VEGFA,VLDLR,YLPM1,ZFX	243 (21)
miR-129-5p (miRNAs w/seed UUUUUGC)		mature microrna	Activated	3.126	bias	3.04e-07	A1CF,AMD1,ANK3,ANTXR2,ATRN,CACYBP,CADM1,CDK5R1,CELF2,DLX2,FAM155B,GLUL,GLYR1,GSE1,INTS6,ISOC1,KCTD8,LRIG3,MAN1A1,MCUR1,MEF2A,MTCH2,MXD4,NFIA,NFIB,NSFL1C,PLEKHA8,PSD3,RNLS,RRAGC,RRAGD,S1PR3,SCARA5,SORBS2,TMEM201,TSHZ2,TXNDC15,VGLL3,WIPF2,XPO7,ZBTB7A,ZFX,ZMAT3,ZNF395
estrogen		chemical drug		-1.198		3.11e-07	ALB,ART3,CRY2,CXCL12,CYP19A1,DUSP1,FOS,HBEGF,HSPH1,IFNG,IGF1,IL10,KDR,MYC,NFIL3,OXT,PENK,PPRC1,RET,SKP2,TOP2A,TYMS,VEGFA,ZFP36	216 (22)
miR-634 (miRNAs w/seed ACCAGCA)		mature microrna	Activated	3.086	bias	3.26e-07	AKAP12,ANKRD37,B3GALNT1,BUB3,CADM2,CD3E,COA7,COL6A3,COMMD9,CYFIP2,DKC1,FASN,FLT1,HN1,HOXA1,IDE,IFIT2,ITGB8,KATNAL1,LETM1,LFNG,METTL17,MS4A2,NAA50,NASP,PALLD,PATL1,PCP4L1,PDE4DIP,PGF,PHACTR1,PIPOX,PLAU,PTP4A2,PTPRG,RASA1,RGS12,RXRA,SAMD8,SAR1B,SLC1A1,SLC25A20,SLCO2B1,TBC1D8,TCF21,TIPIN,TPCN2,TRRAP,VASH1,WBP2,ZNF280D,ZNF382,ZNHIT6
miR-183-5p (miRNAs w/seed AUGGCAC)		mature microrna	Activated	3.621	bias	3.41e-07	A1CF,AAK1,AKAP12,AMD1,AMOT,ATRN,BBIP1,BUB3,CCP110,CDK5R1,CDS2,CELF2,CYYR1,DDIT4,EEF1E1,EML4,EXO1,FAM65B,GCLM,GINS4,GPAM,GSE1,HBEGF,HEATR1,HRH1,ITGB8,KCNE3,L3MBTL3,LTN1,MAF,MEF2C,MSL3,MTCH2,MXD4,MYF6,NAA40,NCK2,NIP7,NPHS2,NRCAM,OSBPL8,PALLD,PHLDB2,PSD3,PTP4A2,RHPN2,SESN1,SOCS6,SPRED1,SRSF11,TMCC3,VGLL3
miR-4760-5p (and other miRNAs w/seed UUAGAUU)		mature microrna		0.751	bias	3.58e-07	ABHD5,AKAP12,AMD1,ANKRD46,ARID2,EGLN1,EMB,IFNG,ITGB8,KATNAL1,LEP,MCUR1,PITRM1,PSD3,PTHLH,SLC1A1,SPRED1,SYCP3,TMEM39A,TOR1AIP2,VWDE,WDR33
miR-133a-3p (and other miRNAs w/seed UUGGUCC)		mature microrna		1.714	bias	3.66e-07	AAK1,ACAT2,ADPRHL2,AKAP9,AMD1,ANKRD44,ANKRD46,B3GALNT1,CDH3,CDK5R1,CNP,COL6A3,CXCL12,DCP1A,DNAJC3,EDEM1,ENC1,FADS1,FAF2,FAIM,FAM193B,FAM57A,FLT1,FUCA1,GLRX,HRH1,ID4,IFIT2,IGF1R,KLRC4-KLRK1/KLRK1,LPGAT1,LRRFIP1,LUZP1,MAFF,MAT2B,NAA40,NELFA,NFIA,NFIB,PFKFB3,PLEKHA8,PSD3,PTPRK,QPCTL,SCARA5,SESN1,SIMC1,SLC16A3,SLC35F2,SMPD4,SPTLC2,TBPL1,TOR1AIP2,WDR33,WDR81,WIPF2,ZFP1,ZNF322,ZNF395
BRCA1		transcription regulator		0.548		3.67e-07	CDH3,CYP19A1,CYP1A1,DDIT4,E2F3,EXO1,FAS,GADD45A,IFIT2,IFIT3,IGF1R,MYC,NEK2,PLSCR1,RBL1,RRM2B,VEGFA	218 (23)
miR-4258 (miRNAs w/seed CCCGCCA)		mature microrna		1.762	bias	3.79e-07	ACSBG1,ADM5,ANKS3,ASB13,ATP2B2,ATRN,CLK3,CYGB,GCLM,GINS4,GPATCH4,HDAC4,HILPDA,HNMT,IGF1R,KIAA1324,KIF1B,LPCAT3,LPGAT1,LRP1,LRPPRC,LRRC20,MAP3K9,MAT2A,MCUR1,MSC,MXD4,MYOD1,NAT9,NR1I2,NR4A3,PHRF1,PIK3R2,PNPLA3,PODNL1,PPP1R3B,QSOX1,RXRA,SLC16A3,SLC2A3,SLC35F2,TCF21,TMEM201,TRUB2,TSPAN17,TXNDC15,VSTM4,WWP2
miR-4715-5p (miRNAs w/seed AGUUGGC)		mature microrna	Activated	2.896	bias	4.38e-07	ACSBG1,ADAMTS3,ADM5,ADPGK,CALML4,CCT6A,CDC23,CELF2,DPT,EML4,GJA4,HEATR1,IDE,IFNG,KLRC4-KLRK1/KLRK1,LGR4,LMCD1,MTAP,NAGPA,PAPOLA,PBRM1,PGF,PLEKHA8,RRAGD,SAMD8,SAR1B,SLC1A1,SMC4,TBC1D8,TEX2,TMCC3,UBTF,VGLL3,WDR33,WDR81,ZNF382
phorbol myristate acetate		chemical drug		0.696		4.45e-07	ALB,BTG2,CCNA2,CEBPA,CXCL13,CYP19A1,CYP1A1,DMBT1,DNMT1,DUSP1,E2F3,EIF4EBP1,EIF4G1,FAS,FCGR1A,FLT1,FOS,HBEGF,HSPA4,IFNG,IGF1,IL10,ITGA2,IVL,LHB,LTB,MAF,MYC,NFIL3,PCSK2,PECAM1,PLAU,POU1F1,PRKCZ,PTPRG,RASA1,RCAN1,RGS2,RXRA,SLC2A1,SLPI,SPHK1,STAR,TFDP1,TJP2,TNFSF10,TRH,VEGFA,VLDLR,ZFP36	239 (19)
sodium arsenite		chemical drug		0.412		4.7e-07	CEBPA,FOS,GADD45A,GCLM,GSS,HSPA4,MAT2A,MAT2B,TNFSF10,VEGFA	148 (18)
pirinixic acid		chemical toxicant		0.298		5.65e-07	ACAT2,ACSL1,ACSL5,APOA4,BNIP3,CCNA2,CCT6A,CIDEA,CXCL12,CYP1A1,DECR1,DLAT,FADS1,FAS,FASN,GADD45A,GAPDH,GLUL,GPAM,HILPDA,IFITM3,IFNG,KDR,KLF11,LEP,MYC,NPC2,NR2C1,RXRA,SLC25A20,SLC27A1,SYCP3,VEGFA	171 (21)
IGF1	-1.54	growth factor		0.535		5.73e-07	ADM,ANPEP,BHLHE40,CCNA2,CNP,CYP19A1,DDIT4,FASN,FOS,GAPDH,GHRHR,HBB,IFITM3,IGF1,IGF1R,IL10,LEP,MYC,MYOD1,OXT,PCOLCE,PENK,PLAU,POU1F1,S100B,SLC2A1,SLPI,STAR,UBTF,VEGFA	266 (23)
miR-4276 (and other miRNAs w/seed UCAGUGA)		mature microrna	Activated	3.189	bias	5.8e-07	ADPGK,AHCTF1,AMOT,ANKRD44,B3GALNT1,BNIP3,CD93,CSTF1,CXCL13,DKC1,DNAJC3,EIF2S1,FAM107B,FAM122A,FAM188A,FLRT2,FLT1,FPGT,GLUL,GPAM,IFIT2,INTS7,ITGB8,LAMC2,LPGAT1,LRRFIP1,MAF,MGMT,MID1,MS4A2,MSL3,NASP,NEK2,NIP7,NR2C1,NT5DC1,PPP1R3B,RRM2B,SNRPF,SRGAP1,STAR,TMEM86A,TOR1AIP2,YLPM1,ZNF280D
miR-4445-3p (and other miRNAs w/seed ACGGCAA)		mature microrna		0.057	bias	5.91e-07	BNC1,CACYBP,CDH3,CSTF1,E2F3,FBXO9,GPAM,GTF2F2,HDAC4,HNMT,HOXD3,ITGA6,KLF11,NDUFAF6,PGM3,PTHLH,ROCK2,SOCS6,SRSF11,SRSF6,TFDP1,TIA1,TSPAN9,ZFP1,ZNF382
forskolin		chemical toxicant		0.854		6.24e-07	AKAP12,ARL4C,BAG3,BHLHE40,BTG2,CNP,CXCL13,CYFIP2,CYP19A1,DIO2,DUSP1,FCER1A,FOS,GADD45A,GHRHR,IFNG,IGF1,IGF1R,IL10,INHA,LEP,LHB,MAP4K4,MAT2A,MYC,NFIL3,NPC2,NR4A3,PCSK1,PENK,PLAU,POU1F1,PTHLH,RGS2,S1PR3,SLC2A1,STAR,TAC1,TRH,VEGFA	245 (19)
methylprednisolone		chemical drug		1.125		6.31e-07	ACSL1,ALDOB,ANPEP,ARL4A,ATRN,CCT6A,CDH3,CIDEA,CNP,DDIT4,DUSP1,FOS,GADD45A,GCLM,HNMT,HSPH1,HYAL2,IGF1,IL10,ITGA2,IVL,KRT19,LGR4,MGMT,MYC,NFIA,NFIB,NOLC1,PHLDA2,PLAU,PLLP,RGS2,SLC2A3,SLC37A4,TOB1,TOP2A,WDR74,ZFP36	232 (22)
IL5		cytokine		1.059	bias	6.33e-07	AK3,BNIP3,EGLN1,EIF4EBP1,ERO1A,FAM65B,FAS,GADD45A,GCLM,GPAM,HBEGF,HSPH1,IFNG,LFNG,LRRC8C,LTB,MAT2A,MS4A2,NEK2,NFIL3,PFKP,QSOX1,SLC16A3,SLC2A1,SOCS1	245 (19)
genistein		chemical drug		1.026		6.43e-07	ADM,ARSA,CEBPA,CXCL12,CYP19A1,CYP1A1,DNMT1,DUSP1,FOS,FUCA1,GGA2,IFIT2,IGF1,IGF1R,IL10,IVL,LGMN,MYC,NAGPA,NPC2,PLBD2,RRAGC,RXRA,SH2B2,SLC11A2,SOCS1,SPHK1,STAR,TPP1,VEGFA	232 (18)
CREM		transcription regulator		0.376		6.97e-07	BHLHE40,BTG2,CD247,CYP19A1,DIO2,DUSP1,FOS,HSPA4,IFNG,INHA,NFIL3,NPC2,PCSK1,SMC4,STAR,TAC1,VEGFA	221 (19)
Growth hormone		group		-0.887		7.04e-07	ALB,CDH3,CEBPA,FASN,FOS,GHRHR,IGF1,IGF1R,MYC,MYOD1,PFKFB3,PIK3C2B,S100B,SOCS1,TCF21,TNFSF10	246 (23)
DRD2		g-protein coupled receptor		-1.941		7.46e-07	FOS,IGF1,PCSK1,PCSK2,PENK,SLC6A3,TAC1,VEGFA	222 (23)
miR-4779 (miRNAs w/seed AGGAGGG)		mature microrna		1.967	bias	7.48e-07	ACSL5,AK3,ALKBH5,CD2,CD3E,CDA,CLN6,CYGB,DLX2,DPF2,EIF2S1,EIF4EBP1,ENSA,FAF2,FAM155B,FBXL20,FLT1,GLRX,GLUL,GSS,HELLS,HNMT,HOXA1,HR,HTRA3,IGF1,INHA,ITGA2,KATNAL1,KIAA1324,KIF1B,LRRC20,MAMDC2,MAP4K4,MSL1,MTSS1,NAA50,NCOA7,NELFA,NOL6,NSD1,NSFL1C,PECAM1,PFKFB3,PHACTR1,PIK3R2,PLBD2,PQLC2,PRELID2,PTP4A2,PTPRR,PYGM,R3HDM4,RAMP2,RET,RXRA,S100PBP,SHE,SLC25A20,SNAI1,SPRED1,SRGAP1,TMEM201,TMEM86A,WLS,ZBTB7A
EIF2AK3		kinase		0.559	bias	7.51e-07	BTG2,CA9,DNAJB9,DNAJC3,EIF4EBP1,ERO1A,GADD45A,IGF1,MECR,MYC,NFIL3,TBPL1,VEGFA,ZFP36	243 (24)
miR-4722-5p (miRNAs w/seed GCAGGAG)		mature microrna		1.08	bias	7.94e-07	ACSL1,ADAM19,AK3,AMER3,ANKRD37,ARL4C,BRF2,CACYBP,CBL,CCL21,CD247,CDS2,CELF2,CIDEA,CPN1,DBNDD1,DESI2,DLX2,FAM155B,FCRL5,FLT1,FPGT,GAS7,HBEGF,HEATR1,HOXA1,HR,KATNAL1,KCTD11,LETM1,LRPPRC,LRTOMT,MAB21L3,MAF,MCUR1,MEF2C,MRI1,NFYC,NGB,NIP7,NOCT,NR4A3,OAF,PARP9,PDE4DIP,PECAM1,PFKFB3,PGF,PHF12,PIP4K2A,PPP1R3B,QSOX1,R3HDM4,SCARA5,SDCBP2,SLC27A1,SLC2A1,STAR,STARD10,TCEB3,TOR1AIP2,TPP1,TRAPPC12,URM1,VASH1,W…
bucladesine		chemical toxicant		0.298		8.29e-07	CNP,CYP19A1,DIO2,DUSP1,ENPP1,FCER1A,FOS,GLUL,ID4,IFNG,IGF1,IGF1R,IL10,LEP,LPCAT1,MAT2A,MYC,NR4A3,PLAU,QSOX1,RBL1,RGS2,S100B,SLC2A1,STAR	217 (22)
doxorubicin		chemical drug		0.701		8.98e-07	ADM,ALB,BTG2,CP,DNMT1,DUSP1,E2F3,EXO1,FAS,FOS,GADD45A,GSS,HBEGF,KLRC4-KLRK1/KLRK1,LAMC2,MEF2C,MYC,NPHS2,RRM2B,SESN1,SLC19A2,SLC2A1,SNAI1,SPHK1,TOP2A,VEGFA	224 (21)
miR-4671-3p (miRNAs w/seed UAGUGCA)		mature microrna	Activated	2.129	bias	9.07e-07	ACSL1,AMOT,BHLHE40,BUB3,CACYBP,CXCL12,DICER1,FAM107B,FAM155B,FBXO9,HCFC2,HEATR5A,HNMT,HOXA1,IGF1,ITGA6,KLF11,LPGAT1,MAF,MAT2B,NFIA,NOLC1,OSBPL10,PLLP,PTPRG,RASA1,RBM25,RRAGD,SAR1B,SPRED1,SRSF11,STEAP4,TAC1,TEX2,TPP1,TSHZ2,TXNDC15,VSTM4
hydrogen peroxide		chemical - endogenous mammalian		0.87		9.44e-07	BTG2,CCNA2,CD247,CYP1A1,DDIT4,DNMT1,DUSP1,FAS,FOS,GADD45A,GLRX,HBEGF,IDE,IFNG,IGF1R,IL10,ITGA2,ITGA6,KDR,LGR4,MYC,NFIL3,OAZ2,PGF,PTP4A2,SESN1,SNAI1,STAR,VEGFA,WDR26,ZBTB7A	234 (23)
miR-214-3p (and other miRNAs w/seed CAGCAGG)		mature microrna		1.756	bias	9.89e-07	AAK1,ABI3,ACSL1,ADAR,ADGRF2,AKAP12,AREL1,BHLHE40,CADM1,CBL,CD247,CDK5R1,CDS2,CEP44,CLDN2,COA7,COL6A3,CRY2,CYTH2,DBNDD1,DNAJB9,FAM122A,FAM134A,FAM65B,HR,INTS7,ITGB8,KIF1B,LETM1,LFNG,LPAR3,LPCAT1,LPGAT1,LRRC8C,LRRFIP1,LUZP1,MAFF,MCAT,MCUR1,MED15,MEF2C,MFSD6L,MS4A2,MXRA5,NAA50,NAGPA,NFIA,NMB,NOL6,NR1I2,NR4A3,NSD1,NSFL1C,NT5DC1,PDE4DIP,PGF,PLBD2,POLR3A,PPP1R13L,PRSS12,PSD3,SESN1,SLC27A1,SLC35F2,SLC6A…
miR-509-5p (and other miRNAs w/seed ACUCCAG)		mature microrna	Activated	2.658	bias	9.92e-07	AKAP12,AKIP1,AMOT,BBIP1,BRF2,CAST,CD2,COA7,CYTH2,CYYR1,DPF2,DTX3L,EDEM1,EXO1,FAM171B,GCLM,GGA2,HYAL2,IDE,INTS6,KCNE3,MAN1A1,NOCT,PAPOLA,PCSK1,PDE4DIP,S100PBP,S1PR5,SAR1B,SKP2,SLC25A20,SLC35F2,TOR1AIP2,TPCN2,TSTD2,WDR33,ZMAT3,ZNHIT6
miR-2117 (miRNAs w/seed GUUCUCU)		mature microrna	Activated	2.253	bias	9.92e-07	ACSL1,AMD1,ARHGDIB,ARID2,ATRN,BCLAF1,CCDC3,CCT6A,CDC27,CNP,CRNKL1,CXADR,DNAJC3,EIF2S1,ENPP1,EYA3,FADS1,FAM122A,GPAM,GPR39,ITGB8,LGR4,MAFF,METAP1,NOLC1,NR4A3,NRCAM,PARP9,PFKFB3,PGM3,SDCBP2,SLC11A2,STAMBP,STEAP4,TMEM144,TMEM248,VLDLR,ZNF322
Ins1		other		-0.477		1.02e-06	ALB,CEBPA,CYP1A1,EIF4EBP1,FADS1,FASN,FOS,GAPDH,IDE,IGF1,IGF1R,IL10,ITGA6,LEP,LRP1,MYC,MYOD1,OXT,PIK3R2,PRKCZ,RBL1,RXRA,SLC27A1,SLC2A1,SLC6A3,VEGFA	269 (22)
miR-936 (miRNAs w/seed CAGUAGA)		mature microrna	Activated	2.719	bias	1.04e-06	ACSL5,ADAMTS3,AK3,AKAP9,ANKRD44,ANKRD46,AREL1,ARL4C,BCLAF1,BNIP3,CACYBP,CD247,CEP44,COA7,DNAJB9,GJA4,GPAT3,HTRA3,IFIT2,IGSF1,KCTD11,KDR,LRRC8C,LRRFIP1,MCUR1,NCOA7,PATL1,RCAN3,SLC11A2,SLC6A3,SORBS2,SPRED1,TIGD2,TMX4,TNFSF10,USP37,XPO7,YLPM1
FGF2		growth factor		0.859		1.04e-06	ALB,ANPEP,BTG2,CNP,CXCL12,ENPP1,FAS,FLT1,FOS,GADD45A,HBEGF,IGF1,IGF1R,KDR,MYOD1,NOTCH4,PCSK2,PENK,PGF,PLAU,SLC2A1,SNAI1,SPHK1,STAR,TAC1,TNFSF10,TOP2A,VEGFA	254 (22)
miR-4476 (and other miRNAs w/seed AGGAAGG)		mature microrna		1.997	bias	1.08e-06	ACTL6A,ADGRF2,AIFM2,ALOX15,ARSA,BHLHE40,BNC1,CBL,CD247,CEP44,CNP,COL6A1,CRYZL1,E2F3,EGLN1,EIF4EBP1,EMB,EYA3,FADS1,FBXO41,FBXO9,FCGR1A,FLT1,GJA4,GPX6,GSE1,ISOC1,LFNG,MAP10,MAT2A,MCAT,NDUFA5,NOLC1,NPHS2,NR4A3,NUP54,OAF,PBRM1,PLSCR1,RET,SCAMP5,SLC11A2,SOCS4,SPRED1,SPTLC2,STAMBP,TPP1,TRRAP,VSTM4,WDR33,WIPF2
miR-1225-3p (miRNAs w/seed GAGCCCC)		mature microrna	Activated	2.762	bias	1.09e-06	AAK1,ADGRF2,ADPRHL2,AP1M1,AREL1,BRF2,CD93,CDS2,COL6A1,CYYR1,DUSP1,EDEM1,ENSA,FAM155B,FLT1,GAS7,GHRHR,GLDN,GPATCH4,GRHL2,HDAC4,IKBKG,IL10,KIAA1644,LETM1,LPCAT3,LRRFIP1,LYRM4,MAB21L3,MACF1,MCAT,MECR,METTL21A,MID1,MSL1,MSL3,NGB,NSD1,NSFL1C,OAF,OAZ2,PDE4DIP,PHRF1,PLBD2,PLOD1,PODNL1,POLR3A,PPP6R2,PTP4A2,QSOX1,R3HDM4,RBFA,RET,RGS12,RRAGC,RXRA,S100B,SCAMP5,SLC25A22,SLC2A1,SLC6A3,TEX2,TJP2,TSPAN9,VSTM4,W…
miR-128-3p (and other miRNAs w/seed CACAGUG)		mature microrna	Activated	2.313	bias	1.12e-06	ABHD5,ADAM19,ADGRF2,AMD1,ARID2,BTG2,CDH5,CDS2,CIDEA,CSRP2,CXADR,DCP1A,DNAJC3,DROSHA,DTX3L,DTX4,E2F3,EHF,FADS1,FAM155B,FAM193B,FAM65B,FBXL20,FCGR1A,GGA2,GLRX,GPAM,GPR39,HBEGF,HDAC4,HEATR5A,IGF1,ITGA2,KIAA1551,LAMC2,LEP,LPAR6,LPCAT1,LPGAT1,LRRFIP1,MSL1,NAA50,NCOA7,NEK2,NFIA,NFIB,NFIL3,NOTCH4,NR2F2,NSD1,OAF,OSBPL10,QPCTL,RBFA,RET,RGS2,RUNDC3A,RXRA,SCAMP3,SESN2,SHE,SNAI1,SOCS6,SPTLC2,SS18,TEX2,TIA1,T…
EPAS1		transcription regulator		1.572		1.21e-06	ADM,AKAP12,BHLHE40,BNIP3,FASN,FLT1,HILPDA,KDR,MAFF,NFIL3,PGF,RASSF1,SLC11A2,SLC2A1,SLC2A3,VEGFA	227 (24)
miR-2110 (and other miRNAs w/seed UGGGGAA)		mature microrna	Activated	2.042	bias	1.39e-06	A1CF,ACSL1,ADGRA3,BBIP1,BMPR1B,CLDN2,CNP,COMMD9,CXCL13,CXCL14,CYYR1,DNAJC21,DTX3L,EIF4EBP1,ENO2,FAM122A,FBXO41,GLDN,GPAT3,HOXA1,HTR1D,IDE,IGSF1,IL10,INIP,KHK,LUZP1,MAT2A,MECR,MTF2,MTHFD1,MTSS1,NSD1,OAF,PATL1,PGF,PGM3,PQLC1,PRSS12,PTOV1,RCAN1,S1PR3,SCAMP5,SLC2A3,SLC6A3,STAMBP,STEAP4,TCF21,TEX2,TJP2,TMEM144,TPP1,TRH,TTC9,VSTM4,WDR46,WIPF2,ZDHHC14,ZFX
GATA1		transcription regulator		1.567		1.41e-06	BTG2,CEBPA,DICER1,E2F3,ENPP1,FCER1A,HBB,INHA,ITGA6,KDR,KLF1,MAMDC2,MS4A2,MTHFD1,MYC,NFIL3,PECAM1,RBL1,SLC38A9,SLC3A2,TOP2A	170 (8)
miR-4707-3p (miRNAs w/seed GCCCGCC)		mature microrna	Activated	2.698	bias	1.44e-06	ACSBG1,ADAR,ADM5,AK3,ANTXR2,APITD1/APITD1-CORT,CAMK2N2,CD247,CEBPA,COMMD9,CYGB,DNAJC21,EMILIN1,EXOSC2,EYA3,GCLM,GINS4,HEATR5A,IGF1R,INIP,KIAA1324,KIF1B,LEP,LFNG,LPCAT1,LRP1,LRPPRC,MAP3K9,MCUR1,METTL21A,MON1A,MXD4,MYOD1,NCOA7,NR1I2,OAF,PACSIN2,PARP11,PHLDA2,PPP1R3B,PQLC1,RBL1,RNF40,SHE,SLC25A22,SLC2A3,SPTLC2,TRUB2,TTLL12,TXNDC15,VSTM4,ZER1,ZNHIT6
CRH		cytokine		-0.825		1.49e-06	CCNA2,DIO2,FOS,IL10,IVL,LEP,RAMP2,SLC2A1,SLC2A3,STAR,TAC1	231 (22)
miR-874-3p (miRNAs w/seed UGCCCUG)		mature microrna	Activated	3.079	bias	1.54e-06	ACSBG1,ADAM19,ADAR,ANPEP,ARL4C,ATRN,BUB3,CD247,CDC23,CDS2,CLDN2,CNP,CYFIP2,E2F3,EDEM1,EIF4EBP1,FADS1,FAM107B,FBXO41,FLT1,GAS7,INTS6,KCNE3,KIAA1324,LEP,LRRC20,LUZP1,MCUR1,MID1,MTAP,MYOD1,NOL6,NRCAM,ODF2L,PCP4L1,PECAM1,PHLDB2,PIK3C2B,PITRM1,PLAU,PLEKHA8,PNPLA3,PODNL1,POLR1D,PPP6R2,PRELID2,PSD3,RUNDC3A,SLC37A4,SLC6A3,SOCS4,STARD8,TCF19,TIA1,TMTC4,VASH1,WIPF2,ZBTB7A,ZFYVE1,ZNF322
POLR2A		enzyme				1.54e-06	ANKRD37,CCNA2,FOS,GAPDH,MYC,MYOD1,SRSF6,STAR,VEGFA
FAS	1.55	transmembrane receptor		-1.09		1.56e-06	AKAP9,ARL4A,CAST,CD93,CDK5R1,COL6A1,COL6A3,CYTH2,FAS,FLT1,FOS,IFNG,IL10,ITGB8,MAP4K4,MEF2C,MOAP1,PECAM1,PHLDA2,PIK3C2B,PLAU,PTP4A2,RASA1,RRAGD,SLPI,STAMBP,TNFSF10,VEGFA	179 (16)
miR-766-3p (miRNAs w/seed CUCCAGC)		mature microrna	Activated	2.105	bias	1.65e-06	A1CF,ACSL1,ADPGK,ALKBH5,AMER3,AMOT,ARSA,ATRN,CADM2,CBL,CNP,COA7,COG8,COL6A3,COMMD9,CYGB,CYTH2,DDX42,DKC1,ENC1,ENSA,EYA3,FADS1,FAM134A,GPATCH4,GRHL2,HLCS,KLF11,LPCAT1,LRP1,LRRFIP1,LRTOMT,LUZP1,LYRM4,MRPS23,MYCBP,NAGPA,NGB,ODF2L,PACSIN2,PGF,PIK3C2B,PLOD1,PPP1R3B,PSD3,PTHLH,PTP4A2,RET,RNLS,RRM2B,S1PR3,SESN1,SKP2,SLC2A3,SOCS1,SRGAP1,TCF19,TSHZ2,TSPAN17,TTC9,ZFX
MAPK14		kinase		1.348		1.67e-06	CCNA2,DUSP1,FAS,FASN,FLT1,FOS,IFNG,IL10,ITGB8,IVL,KDR,MEF2C,PECAM1,PLAU,STIM1,TOP2A,VEGFA,ZFP36	200 (18)
IL10RA		transmembrane receptor		-1.095		1.67e-06	ACSL1,ACSM3,ALDOB,BNIP3,CSRP2,CYFIP2,DDIT4,DPT,EHF,ENTPD5,ERO1A,FAM26F,FAS,IFI16,IFNG,KCNE3,LRIG3,MECR,PCOLCE,SLC16A3,SLC2A1,SLCO2B1,SORBS2,STARD8,TAC1,WWP1	180 (10)
EGR2		transcription regulator		-0.082	bias	1.7e-06	CAST,CYP19A1,DIO2,DMBT1,FOS,ID4,IFNG,IL10,KDR,LHB,NUP54,PTHLH,SOCS1,STAR,TCEB3,TNFSF10,VEGFA	158 (19)
ARNT		transcription regulator		1.998		1.89e-06	BHLHE40,BNIP3,CYP1A1,DEGS2,FLT1,GAPDH,IL10,LEP,SLC2A1,SLC2A3,TP53RK,VEGFA	193 (18)
miR-145-5p (and other miRNAs w/seed UCCAGUU)		mature microrna	Activated	2.139	bias	1.96e-06	ABHD17C,ADAM19,ADPGK,AKAP12,AKAP9,ANTXR2,AREL1,ARID2,ATAD2B,BNIP3,CCNA2,CD93,COMMD9,CP,CWC22,DENND4B,DTX4,DYNC2LI1,E2F3,EML4,EYA3,FAM107B,FAM134A,FBXO9,FLT1,GCLM,HBEGF,IGF1R,ITGB8,KIF3A,KLF11,MAF,MAP4K4,MID1,MYC,NAA50,NAT9,NFIA,NFIB,NRCAM,PGM3,PHRF1,PLEKHA8,PSD3,PTP4A2,RASA1,RCAN1,RCAN3,SCAMP3,SLC11A2,SLC27A1,SPTLC2,SRGAP1,SS18,TCEA3,TMCC3,TNFSF13,TSHZ2,TTC9,UBTF,USP37,VSTM4,WBP2,WWP2,ZFP36,ZFYVE1
8-bromo-cAMP		chemical reagent		-0.919		1.99e-06	ADM,CYP19A1,DIO2,DUSP1,FAS,FOS,IGF1,IGF1R,INHA,KDR,LHB,MAT2A,MYC,NFIL3,SLC2A1,STAR,VEGFA,VLDLR	211 (22)
AHR		ligand-dependent nuclear receptor		-0.727		2.04e-06	ACTL6A,ADAM19,ADM,BTG2,CAMK2N2,CCL21,CCNA2,CEBPA,COL6A1,COL6A3,CYP19A1,CYP1A1,EMILIN1,FOS,GADD45A,HSPH1,IFNG,IL10,ITGA6,MYC,RBL1,SLC1A1,SNAI1,STEAP4,VEGFA	236 (22)
U0126		chemical - kinase inhibitor		0.56		2.17e-06	CA9,CDH5,CDK5R1,CEBPA,CLDN2,CRY2,CYP19A1,CYP1A1,DUSP1,EEF1E1,EHF,FOS,HBEGF,IFNG,IL10,ITGA6,KDR,LEP,LHB,MACF1,MYC,NAT9,PECAM1,PLAU,SLC25A20,SLC2A3,SOCS1,STAR,TAC1,VASH1,VEGFA	222 (20)
5-N-ethylcarboxamido adenosine		chemical reagent		1.335		2.29e-06	ADM,ALB,BAG3,BHLHE40,BTG2,GADD45A,IFIT2,IFIT3,IFNG,IL10,NFIL3,NR4A3,RGS2,VEGFA	227 (22)
PI3K (complex)		complex		-1.335		2.44e-06	CCT6A,CD2,CDK5R1,DUSP1,FOS,GCLM,HBEGF,IFNG,IGF1,IL10,INHA,KDR,LEP,MEF2C,MYC,MYOD1,PRKCZ,RGS2,SLC26A3,SLC6A3,SNAI1,TNFSF10,VEGFA	216 (19)
miR-3679-3p (miRNAs w/seed UUCCCCC)		mature microrna	Activated	3.082	bias	2.47e-06	AAK1,ALDOB,ANKRD44,ANKS3,ARL4A,BMPR1B,CADM1,CCP110,CDC27,CP,CSRP2,CYP19A1,DDIT4,DICER1,DLAT,DNAJC21,DTX4,ENPP1,EXOSC2,FAM122A,FAM155B,FCRL5,FUCA1,GPAT3,GRHL2,ID4,IGF1R,ITGA2,ITIH3,KCTD11,KIF3A,L3MBTL3,LPCAT3,LPGAT1,LUZP1,MAB21L3,MEF2A,MSL1,MTAP,MTF2,MXD4,NOLC1,OAZ2,PBRM1,PCP4L1,PEX12,PPP1R3B,PRSS12,R3HDM4,RASSF1,RBFA,RRAGD,RRM2B,SAMD8,SCARA5,SESN1,SLC11A2,SLC1A1,SOCS4,SPTLC2,STARD8,TCEB3,TMEM86A,…
arsenite		chemical toxicant		0.336		2.57e-06	CELF2,CYP1A1,DHRS1,DUSP1,FOS,GADD45A,GCLM,HSPA4L,IGF1,IL10,MAFF,MYC,PTPRG,VEGFA	215 (21)
TGFB2		growth factor		0.729		2.66e-06	BHLHE40,CDH5,FAS,GAS1,HBEGF,ID4,IFNG,KDR,PECAM1,PTHLH,SESN1,SPHK1,VEGFA	273 (21)
miR-7a-5p (and other miRNAs w/seed GGAAGAC)		mature microrna		0.42	bias	2.67e-06	A1CF,ABHD5,AMOT,ARID2,ARL4C,ATP2B2,ATRN,BNC1,CCL21,CNP,CRNKL1,CRY2,CXCL12,DDIT4,DNAJC15,ENO2,EXOSC2,FAM107B,FAM134A,FLRT2,FOS,FPGT,GGA2,GLUL,GSE1,HELLS,IDE,IGF1R,ITGB8,KIF1B,LTN1,MAP10,MAP3K9,MXRA5,NCOA7,NFIA,NFIB,NR2C1,NR4A3,PATL1,PIK3C2B,PLBD2,ROCK2,SCAMP5,SHE,SLC3A2,STAMBP,TMX4,WIPF2,WWP1,ZMAT3,ZNF395,ZNF692
miR-4713-5p (miRNAs w/seed UCUCCCA)		mature microrna	Activated	3.081	bias	2.7e-06	ADAM19,AIFM2,AMOT,ANTXR2,BTG2,CALML4,CAST,CBL,CEBPA,CXCL14,CYYR1,DIO2,DKC1,DPF2,DROSHA,DTX3L,DTX4,EDEM1,ENPP1,ENSA,FADS1,FADS6,FCRL5,FLT1,GRHL2,HILPDA,HLCS,ID4,KCNE3,LRTOMT,LTN1,MACF1,MAMDC2,MTCH2,NAA40,NAT9,NCAPG,NEK2,NOLC1,NR2F2,NRCAM,ODF2L,PCSK1,PDE4DIP,PGM3,PLEKHA8,PPP1R3B,RAB32,RCAN1,S1PR5,SLC2A3,SLC6A3,SPTLC2,STAR,TCEA3,TMEM39A,TSHZ2,TTLL12,ZFX,ZNF322,ZNF395
tetrachlorodibenzodioxin		chemical toxicant		1.574		2.73e-06	ACTL6A,CCL21,CCNA2,COL6A1,CYP1A1,DNMT1,FAS,FOS,FXYD4,HDAC4,IFNG,IL10,KCNE3,KIF1B,KRT19,LHB,MYC,PCSK1,PCSK2,SESN1,SLC2A1,SLC2A3,SLCO2B1,STAR,STEAP4,VEGFA,VLDLR	205 (22)
miR-335-5p (and other miRNAs w/seed CAAGAGC)		mature microrna		1.718	bias	2.96e-06	ADAM19,B3GALNT1,CDC23,CIDEA,CRNKL1,DHRS1,EYA3,FAM107B,FAM155B,FAS,FLT1,GLYR1,HOXD8,ID4,ITGB8,MAB21L3,MAT2B,NAA50,NNT,NPC2,NR4A3,ODF2L,PARP9,PEX12,PFKFB3,PGF,PGM3,PLEKHA8,PSD3,PUS1,RASA1,RNF40,SRGAP1,SS18,TIA1,TJP2,TOP2A,TPST1,VSTM4,WWP1,ZNF322
TP63		transcription regulator		0.148		2.99e-06	ACTL6A,ADM,BHLHE40,CAST,CCNA2,DDIT4,DICER1,DNMT1,ENSA,FASN,GADD45A,GAPDH,GRHL2,ITGA2,ITGB8,IVL,MYC,PLAU,PPP1R13L,PRKCZ,PTHLH,TIPIN,TPP1,VEGFA	242 (25)
FOXO3		transcription regulator		1.643		3e-06	BNIP3,DDIT4,EIF4EBP1,FASN,FOS,GADD45A,GLUL,IFNG,IGF1,IL10,MYOD1,PLAU,SESN1,SKP2,SNAI1,TNFSF10	211 (22)
miR-19b-3p (and other miRNAs w/seed GUGCAAA)		mature microrna		1.237	bias	3.12e-06	AAK1,ABHD17C,ABHD5,ACSL1,AK3,ANKRD10,ARID2,ATP2B2,CAST,CDC23,CERCAM,CXCL12,DESI2,DICER1,ENC1,GPR39,HCFC2,HDAC4,HYAL1,IGF1,ITGA2,ITGA6,ITGB8,KATNAL1,KIF1B,KIF3A,L3MBTL3,LPGAT1,LRIG3,LUZP1,MACF1,MEF2A,MEF2C,MID1,MTF2,NANP,NFIA,NFIB,NOCT,NUP54,PATL1,PDE4DIP,PFKFB3,PHF12,PPP1R13L,PPP6R2,PTPRG,RASA1,RBM25,RRAGD,S100PBP,SAMD8,SAR1B,SLC11A2,SLC2A1,SOCS1,SOCS6,SRGAP1,SRSF6,STARD8,TBC1D8,TCEB3,TCF21,TIA1,…
miR-147-5p (and other miRNAs w/seed GGAAACA)		mature microrna	Activated	2.876	bias	3.2e-06	A1CF,ADAMTS3,ADAR,AK3,AMD1,ARL4C,ASB13,BUB3,CACYBP,CDA,CP,EML4,ENSA,FAF2,FBXL20,FGG,FXYD6,IKBKG,IL10,INTS7,KIF3A,LAMC2,MEF2C,MGMT,NFIA,NFYC,PBRM1,PCSK1,PGM3,PHRF1,PTPRK,RHPN2,RNLS,SPRED1,STEAP4,TBC1D32,TFDP1,TMEM144,TMX4,TOR1A,TXNDC15,USP37,VGLL3,ZNHIT6
miR-141-3p (and other miRNAs w/seed AACACUG)		mature microrna		1.633	bias	3.27e-06	ANKRD10,ANKRD44,AQP11,ARL4A,ATRN,BHLHE40,BMPR1B,CADM2,CBL,CDS2,CNP,CXADR,CXCL12,DLAT,E2F3,EDEM1,EGLN1,EXOSC2,FAM188A,FBXL20,FLT1,GADD45A,GLRX,HDAC4,HEATR5A,HSPA4L,IDE,IGF1R,IRF6,ITGA6,KATNAL1,KIF1B,KIF3A,LETM1,LGR4,LPAR3,MACF1,MAF,MAP4K4,MSL1,MTF2,MTSS1,NAA50,NFIA,NRCAM,PEG3,PLEKHA8,PTPRG,RHPN2,S100PBP,SAMD8,SESN2,SLC11A2,SLC19A2,SLC1A1,SLC38A9,SNAI1,SORBS2,TAC1,VGLL3,WDR33,WDR81,ZMAT3
BDNF		growth factor		1.867		3.32e-06	ANXA5,BAG3,BHLHE40,CP,CYGB,DNAJC21,DUSP1,FOS,GLUL,HSPA4L,ITIH3,KIF1B,LEP,MYOD1,NMB,NR4A3,PENK,PFKFB3,PRKCZ,PRSS12,TAC1,TBC1D8,TMEM45A,TPP1,TRH	213 (19)
IFN alpha/beta		group		-1.005		3.33e-06	CCL24,CXCL14,GAS7,IFI16,IFIT2,IFIT3,IFNG,IL10,SLPI,SOCS1,TNFSF10,TNFSF13	205 (16)
miR-4736 (and other miRNAs w/seed GGCAGGU)		mature microrna		0.895	bias	3.4e-06	ACSL5,AIFM2,ALKBH5,ANK3,AP1M1,APOA4,ATP2B2,BBIP1,CADM2,CDA,CDH3,CDK5R1,CNP,CRY2,CXCL12,CYYR1,DNAJB9,DNAJC15,DTX4,EIF4EBP1,FAM155B,GLDN,GLRX,GPX6,HBEGF,HRH1,KHK,KIAA1324,KIF1B,KRT19,LOC102724159/PWP2,LRIG3,LRRC8C,MAF,MED15,MEF2A,MFSD6L,MS4A2,NAGPA,OSBPL8,PATL1,PECAM1,PEX12,PGF,PIK3R2,RALGDS,RGS2,RUNDC3A,SAR1B,SCAMP5,SESN2,SLC11A2,SORBS2,STIM1,TCF19,TMEM201,TMEM248,TPP1,TRUB2,TSPAN9,VSTM4,WBP2,WDR8…
NCOA3		transcription regulator		-0.594	bias	3.48e-06	CEBPA,CYP1A1,FASN,HOXA1,IGF1,KDR,LHB,OXT,SLC16A3,SLC2A1	249 (23)
MAPK8		kinase		0.238		3.63e-06	CCNA2,CYP19A1,CYP1A1,DIO2,DNMT1,DUSP1,FOS,IFNG,IL10,LEP,LHB,MAP3K9,MYC,PLAU,TAC1,ZFP36	207 (21)
cyclic AMP		chemical - endogenous mammalian		0.018		3.8e-06	ANTXR2,CEBPA,CYP19A1,ENO2,FCGR1A,FLT1,FOS,HBEGF,IFNG,IGF1,IL10,INHA,KDR,LEP,LHB,MYC,PENK,PTHLH,RXRA,STAR,TNFSF10,TRH	231 (24)
ERBB4		kinase		-1.082		3.81e-06	ADAM19,BTG2,CADM1,CXCL12,DUSP1,GADD45A,HBEGF,MYC,SLC1A1,SLC6A3,SLPI,WWP1	224 (22)
miR-16-5p (and other miRNAs w/seed AGCAGCA)		mature microrna		1.834	bias	3.86e-06	A1CF,ABI3,ACSBG1,ACSL1,ADAMTS3,ADM5,AKAP12,AMOT,ANKRD46,AQP11,AREL1,ATP2B2,BTG2,CADM1,CD3E,CDC23,CDC27,CDK5R1,CDS2,CLDN2,CRYZL1,DCP1A,DICER1,DPT,E2F3,EGLN1,F2,FADS6,FAM122A,FAM134A,FAM65B,FASN,FBXL20,FGF18,GLRX,GPAM,GSE1,HR,HSPA4L,IGF1,IGF1R,INTS6,IRF2BP1,ISOC1,ITGA2,KATNAL1,KCTD8,KDR,KIF1B,LRPPRC,LUZP1,MAMDC2,MAP3K9,MS4A2,MSL1,MTAP,MYBPC1,NFIA,NR4A3,NT5DC1,ODF2L,PEX12,PHLDB2,PLBD2,PPP6R2,PRSS12,…
tamoxifen		chemical drug		0.683		3.93e-06	ADM,AMBP,APOA4,CCNA2,CXCL12,FADS1,FASN,FOS,GAPDH,IGF1,LHB,MYC,OXT,RBL1,SLC1A1,SLC2A3,SNAI1,VEGFA	212 (21)
miR-3194-5p (miRNAs w/seed GCCAGCC)		mature microrna	Activated	3.073	bias	3.96e-06	AAK1,ADPGK,AP1M1,AREL1,ASB13,CBL,CDH5,COA7,CSRP2,CYGB,CYP1A1,DICER1,DPT,EIF2S1,EML4,FAM193B,FBXO41,FBXW4,FCRL5,FLT1,GGA2,GLUL,GPAM,HN1,HR,IFIT3,ITGA2,LETM1,LGI4,LRRC20,LRRC8C,LRRFIP1,LUZP1,MAB21L3,MAF,MAT2A,MAT2B,MCUR1,MED15,METTL21A,MON1A,MRPS23,MS4A2,MSL1,MXD4,NASP,NAT9,NDUFAF6,OAZ2,PFKFB3,PHACTR1,PLBD2,PLLP,PODNL1,PPP1R3B,PPP6R2,PXK,RALGDS,RBFA,RXRA,S1PR3,SAMD8,SARAF,SCAMP5,SHE,SLC16A3,SMPD4,S…
miR-3622a-3p (and other miRNAs w/seed CACCUGA)		mature microrna		1.719	bias	4.02e-06	ABHD6,ACSBG1,ACSL1,ANKRD10,ARSA,CAST,CEP44,CYYR1,E2F3,EIF2S1,FAM134A,HEATR5A,HTR1D,IFNG,ISOC1,ITGA6,IVL,LETM1,LRTOMT,MAP4K4,MSL3,MTCH2,MYOD1,NGB,NR2C1,NSD1,NT5DC1,PARP9,PCSK2,PECAM1,PTPRR,S1PR5,SAMD8,SCARA5,SOCS6,SS18,STBD1,TCF21,TXNDC15,WIPI1,ZNF280D,ZNF674
miR-4749-3p (miRNAs w/seed GCCCCUC)		mature microrna	Activated	2.391	bias	4.14e-06	ABHD6,ALKBH5,ALOX15,AMER3,ANTXR2,BCLAF1,BRF2,CD247,CD93,CDH5,CDK5R1,CDS2,CERCAM,CPT1C,CXCL12,CYGB,CYTH2,CYYR1,DTX4,DUSP1,EIF4G1,FAF2,FAM155B,FBXL20,FLRT2,GAPDH,GSS,HTRA3,ITIH3,KCNE3,KIAA1644,LPCAT3,LRRC20,LRRFIP1,LRTOMT,MECR,METTL21A,MID1,MXD4,MYOD1,NMRAL1,NOLC1,NSD1,OAZ2,PBRM1,PECAM1,PGF,PHRF1,PIK3C2B,PLEKHA8,PPP6R2,PPRC1,PTP4A2,RALGDS,RGS12,RNF40,SCAMP5,SESN2,SLC37A4,SLC38A9,SLC6A3,SMPD4,SPTLC2…
cobalt chloride		chemical reagent		0.365		4.14e-06	ADM,BHLHE40,BNIP3,CYP1A1,DDIT4,FLT1,LEP,SLC11A2,SLC1A1,VEGFA	222 (23)
CDKN2A		transcription regulator		1.109		4.16e-06	AMD1,BTG2,CAPG,CCL24,CXCL13,CXCL14,DUSP1,E2F3,GAS7,IFI35,IFNG,MYC,PEG3,POLD2,RRM2B,TOB1,TPP1,VEGFA,ZMAT3	218 (21)
LIF		cytokine		0.168		4.16e-06	CCNA2,CDH5,CYP19A1,FGG,FOS,HBEGF,IFI16,IFNG,IGF1,KDR,LEP,MYC,NMI,PECAM1,RET,SOCS1,STAR,TAC1,VEGFA	216 (21)
miR-150-5p (and other miRNAs w/seed CUCCCAA)		mature microrna		1.488	bias	4.34e-06	ADAM19,AIFM2,ATAD2B,CALML4,CAST,CBL,CDK5R1,CXCL14,DIO2,DPF2,DTX3L,DTX4,E2F3,ENSA,ERO1A,FADS1,FADS6,FAM65B,FCRL5,GPAM,GRHL2,HILPDA,IFI16,INTS7,LAMC2,MAMDC2,MAP4K4,METAP1,MTCH2,NCAPG,NEK2,NOLC1,NR2F2,NRCAM,PDE4DIP,PECAM1,PFKFB3,PLOD1,PPP1R3B,PQLC2,PRELID2,QSOX1,RAB32,RCAN1,S1PR3,SLC2A1,STAR,STIM1,TSHZ2,TTLL12,UBTF,VEGFA,ZER1,ZNF322
miR-379-5p (and other miRNAs w/seed GGUAGAC)		mature microrna		1.539	bias	4.46e-06	AAK1,ADM5,ARL4A,CLEC14A,DCP1A,DESI2,FUCA1,GHRHR,HBEGF,HLCS,HSPA4L,HTR1D,IGF1R,KATNAL1,LPGAT1,LRRC8C,MACF1,MID1,NFIA,OAF,PIPOX,PTHLH,RET,SLC19A2,TBC1D8,TCEB3,TEX2,TMCC3,TMEM165,TNFSF10,TSTD2,XPO7
miR-4768-5p (and other miRNAs w/seed UUCUCUC)		mature microrna	Activated	3.365	bias	4.5e-06	ATP2B2,CALML4,CAST,CD3E,CEP44,CP,CYFIP2,DLAT,DNAJB9,DROSHA,ENC1,ENPP1,EYA3,FAF2,FAM122A,FAM171B,FCER1A,GCLM,GPATCH2,HNMT,IDE,INTS6,LAMC2,LPGAT1,LTN1,MAP3K9,MID1,NNT,OSBPL10,PARP11,PGF,PLLP,PTPRG,PXK,RNLS,SLC6A3,TARBP1,TOP2A,TSHZ2,USP37,WDR33,ZBTB7A
miR-4660 (miRNAs w/seed GCAGCUC)		mature microrna	Activated	2.02	bias	4.58e-06	ADGRF2,AIFM2,AMER3,ARL4C,BTG2,CACYBP,CCT6A,CD247,CDS2,CYTH2,DMAP1,EML4,ENC1,ENPP1,ENSA,EWSR1,EYA3,FAM134A,FAM155B,FAM193B,FLT1,HEATR1,IDE,LGI4,LUZP1,MAP4K4,MID1,NFIB,NSD1,PFKFB3,PGM3,PHACTR1,PPP1R3B,PPRC1,PSD3,PTPRR,QSOX1,RNF40,RXRA,S100PBP,SCAMP5,SESN2,SLC13A4,SLC1A1,SLC25A22,SLC27A1,TCF21,TMEM86A,TPCN2,TSTD2,TTLL12,VASH1,VGLL3,ZFP1,ZNF322,ZNHIT6
miR-3571 (and other miRNAs w/seed ACACACU)		mature microrna		1.262	bias	4.58e-06	AHCTF1,ANK3,ANKRD44,ATP1B3,BMPR1B,CBL,CDK5R1,DDIT4,DNAJC21,DTX4,E2F3,ERO1A,FBXO9,FLRT2,FOS,FPGT,GPAT3,HILPDA,ITGB8,IVL,MAP10,MEF2A,MID1,MTF2,NFIL3,NFYC,PARP11,PCSK2,PEG3,POLR1D,SCARA5,SESN1,SIMC1,SLC11A2,SLC25A20,SOCS6,SORBS2,STARD8,STBD1,TMTC4,TTC9,USP37,ZFX,ZNHIT6
miR-223-3p (miRNAs w/seed GUCAGUU)		mature microrna	Activated	3.537	bias	4.63e-06	ALDOB,ANKRD10,CALML4,CDC23,CDC27,CLEC14A,CXADR,DDIT4,DESI2,DTX4,EBNA1BP2,EML4,ENTPD5,EYA3,FAM171B,FAM188A,HCFC2,HDAC4,HNMT,IGF1R,ITIH3,MAF,MEF2C,MTSS1,MXRA5,MYCBP,NAA50,NFIA,NFIB,PEX3,PSD3,RASA1,SCAMP3,SLC11A2,SPRED1,SPTLC2,STIM1,TMTC4,TRIM3,TTC9,UBTF,ZFX,ZNF395
miR-1273g-5p (miRNAs w/seed GUGGUUG)		mature microrna	Activated	3.465	bias	4.78e-06	ABHD5,CAMK2N2,CCDC3,CELF2,CEP44,DICER1,DRAM2,DTX4,EHF,FLRT2,FUCA1,GLDN,HR,INTS7,KLF11,MSL3,NPHS2,OSBPL10,RBM25,RUNDC3A,SLC13A4,SLC2A1,SLCO2B1,TFDP1,TMEM19,TNFSF10,TP53RK,UBTF,VGLL3,WDR93,WIPF2,WNK4,ZNHIT6
miR-134-3p (and other miRNAs w/seed UGUGGGC)		mature microrna	Activated	2.965	bias	4.93e-06	AAK1,ABI3,ACSL5,ADAM19,ADM,AMER3,ANK3,ANPEP,ASB13,CCL21,CEBPA,CEP44,CYTH2,CYYR1,DTX3L,FAF2,FAM122A,FGG,FLT1,GPATCH4,GSE1,HBEGF,HDAC4,IFIT3,INTS6,INTS7,ISOC1,LETM1,LPGAT1,MAB21L3,MCAT,MSL3,NOTCH4,NR1I2,ODF2L,PDE4DIP,PKIG,SESN2,SLC2A1,SLC2A3,SPRED1,STAMBP,TMEM201,TMEM39A,TMEM45A,TOR1A,TXNDC15,VASH1,WDR33,WDR81,ZNF630
MTPN		transcription regulator		-1.616	bias	4.97e-06	BNIP3,CCNA2,CEBPA,CP,FAS,FOS,IFNG,IGF1,LTB,MYC,TCF21,TNFSF10	178 (15)
miR-450b-3p (and other miRNAs w/seed UGGGAUC)		mature microrna	Activated	2.757	bias	5.05e-06	ACSL5,AMER3,BUB3,CERCAM,CNP,COMMD9,CYP19A1,DIO2,ENO2,GAS7,GPX6,HEATR1,HNMT,IFNG,LAMC2,LMCD1,MAB21L3,MID1,MTAP,MYCBP,MYO19,NNT,NR1I2,NSFL1C,ODF2L,PBRM1,PNPLA3,ROCK2,STIM1,TNFSF10,TSTD2,WNK4,ZFP1,ZNF280D
PI3K (family)		group		0.878		5.08e-06	ADM,CXCL12,EGLN1,FOS,IL10,PRKCZ,SLC2A1,TNFSF10	229 (19)
miR-338-3p (miRNAs w/seed CCAGCAU)		mature microrna	Activated	3.109	bias	5.2e-06	AAK1,AKAP12,ALDOB,ALKBH5,ANKRD37,ARL4C,CADM2,CBL,CDH5,CNP,EIF2S1,EML4,EYA3,FLT1,GLDN,HN1,IDE,IRF6,KDR,KIAA1324,KIF3A,LAMC2,LRTOMT,MAF,MCUR1,MEF2C,MRPS23,MS4A2,NFIA,NNT,ODF2L,PCP4L1,PDE4DIP,POLR3A,PPP1R3B,PTP4A2,PTPRG,R3HDM4,RASA1,SDCBP2,SHE,SLC25A20,SLC2A3,SLC38A9,TBC1D8,TIA1,TMEM86A,TRRAP,TSHZ2,VASH1,WDR33,WNK4
fenofibrate		chemical drug		0.091		5.63e-06	ACSL1,ACSL5,CCL21,CYP19A1,DECR1,DLAT,FASN,FGG,GADD45A,GAPDH,GLUL,GPAM,HILPDA,KDR,LPCAT3,MAN1A1,MGMT,SLC25A20,SLC27A1,SLCO2B1,STAR,TPP1	193 (19)
miR-669d-5p (and other miRNAs w/seed CUUGUGU)		mature microrna	Activated	2.39	bias	5.69e-06	ARHGDIB,CNP,CXADR,DICER1,DYNC2LI1,EDEM1,EGLN1,HLCS,IGF1,ISOC1,ITGA2,LGR4,LRRFIP1,MAP4K4,MEF2A,MYCBP,NANP,NIP7,NR2C1,ODF2L,PALLD,PBRM1,PEX12,PHLDB2,RNF128,STEAP4,TSHZ2,ZNF322
RBL2		other		1.172	bias	5.79e-06	CCNA2,CRADD,FAS,IVL,MYC,MYOD1,NEK2,RBL1,TYMS,VEGFA	167 (12)
miR-298 (miRNAs w/seed GCAGAAG)		mature microrna	Activated	2.427	bias	5.86e-06	ACSL1,ARID2,CADM2,CAST,CCDC3,CYYR1,DDX42,DICER1,DPT,EDEM1,FAF2,FAM171B,FAM57A,FAM65B,FBXO9,GPATCH4,HEATR1,IRF6,KATNAL1,LEP,LETM1,LPCAT3,LRTOMT,METTL21A,MYBPC1,NAGPA,NCOA7,NPC2,PATL1,PCP4L1,PDE4DIP,PFKFB3,PIPOX,PLOD1,POLR1D,PTPRG,RBFA,SLC11A2,SLC37A4,SRSF6,TSHZ2,TTLL12,UBTF,YLPM1
miR-4691-5p (and other miRNAs w/seed UCCUCCA)		mature microrna		1.89	bias	5.93e-06	ADGRF2,AREL1,B3GALNT1,BCLAF1,BMPR1B,BTG2,CACYBP,CADM2,CDH3,COG8,CYFIP2,CYGB,CYP19A1,ENSA,FAM65B,FAS,FLT1,GAS1,GAS7,GPAT3,GTF2F2,GYS1,HDAC4,INTS6,KATNAL1,KCNE3,LAMC2,LFNG,LUZP1,MAP3K9,MAT2A,MCAT,MFSD6L,MID1,MRPS33,NASP,NR2F2,NSD1,NSFL1C,PALLD,PEG3,PEX3,PHLDB2,PLBD2,PRKCZ,RGS2,RNLS,SESN1,SLC2A1,SLC6A3,SMPD4,SPRED1,SPTLC2,TCF21,TMEM201,TRAPPC12,TRUB2,WLS,WWP1,XPO7
NR4A1		ligand-dependent nuclear receptor		-0.912		5.94e-06	ADM,ALDOB,CDH5,CIDEA,COL6A1,CXCL12,EHF,FASN,GYS1,IL10,LEP,MAT2A,NR4A3,PYGM,RXRA,STAR,STARD10	224 (23)
NAB2		transcription regulator		0.208	bias	6.05e-06	FLT1,FOS,ID4,LHB,PLAU,TNFSF10	120 (11)
GPER1		g-protein coupled receptor		-0.36		6.05e-06	CYP19A1,FASN,FOS,IGF1,MYC,SLC1A1	235 (20)
KLRC4-KLRK1/KLRK1	-6.93	transmembrane receptor		-1.769		6.05e-06	IFNG,IL10,KLRC4-KLRK1/KLRK1,RXRA,TNFSF10,VEGFA	195 (19)
miR-3065-3p (miRNAs w/seed CAGCACC)		mature microrna	Activated	2.643	bias	6.06e-06	ADAM19,ADGRF2,APITD1/APITD1-CORT,AREL1,ARL4A,CCDC3,CDC27,CLDN2,CYP1A1,DIO2,DTX4,FADS1,FAM65B,FBXL20,FBXO7,FOS,GAS1,HBEGF,ISOC1,KDR,KLF11,KLRC4-KLRK1/KLRK1,LAMC2,MAF,MAP4K4,MECR,MFSD6L,MS4A2,NAA40,NASP,NFIA,NFIB,NMI,NOTCH4,NR2F2,NSD1,PALLD,PHLDB2,PTHLH,RBFA,RET,RHPN2,RNF40,SESN1,SLC25A22,SRSF11,STEAP4,TMEM201,UBTF,WDR33,ZNF280D,ZNF382
miR-23a-3p (and other miRNAs w/seed UCACAUU)		mature microrna	Activated	2.14	bias	6.22e-06	ADAM19,AKAP12,ANTXR2,ATRN,BCLAF1,BMPR1B,CDC23,CDK5R1,CDS2,CEBPA,CELF2,CEP44,CLK3,CXCL12,EGLN1,EML4,ENC1,ENO2,ENTPD5,FAM107B,FAM134A,FAS,FUCA1,GLYR1,GPAT3,HRG,INTS6,ISOC1,ITGB8,LGR4,LPGAT1,LRRC8C,MACF1,MAF,MAP3K9,MAP4K4,MAT2A,MEF2A,MEF2C,MTSS1,MYCBP,NAA50,NDUFA5,NFIA,NFIB,NR2C1,OSBPL8,PBRM1,PLAU,PLEKHA8,PNMA1,PTP4A2,RBM25,RET,RPS19BP1,S100PBP,SESN2,SLC1A1,SOCS6,SRGAP1,TCEB3,TIA1,TJP2,TMCC3,TOP2A,T…
miR-1202 (and other miRNAs w/seed UGCCAGC)		mature microrna	Activated	3.526	bias	6.3e-06	A1CF,AKIP1,CCDC3,CDH5,COA7,CXCL12,CYGB,DBNDD1,DICER1,DPT,EDEM1,EIF2S1,EML4,ENTPD5,FAM65B,FCRL5,FLT1,GPAM,HOXD8,LEP,LETM1,LRRC8C,LUZP1,MAF,MAP3K9,MAT2B,MCUR1,MRPS23,MSL1,MYC,NDUFAF6,NR2C1,PECAM1,PHF12,PODNL1,POLR1D,PPP6R2,PXK,RBFA,SAMD8,SARAF,SCAMP5,SESN1,SHE,SRSF6,STAR,STEAP4,TAC4,TJP2,TMEM248,TPP1,TSPAN17,WDR33,WWP2,ZFP1,ZNF280D
benzo(a)pyrene		chemical toxicant		0.267		6.36e-06	CDK5R1,CELF2,CRADD,CYP1A1,DHRS1,FASN,FOS,FYN,GCLM,GNA11,HSPA4L,IGF1,MAF,MAFF,NMI,PTPRG,TCF21,VEGFA	224 (22)
miR-34a-5p (and other miRNAs w/seed GGCAGUG)		mature microrna	Activated	2.625	bias	6.41e-06	ACSL1,ADGRF2,AK3,AKIP1,ANK3,ARHGDIB,B3GALNT1,CA9,CDA,CDC23,CDS2,CELF2,COMMD9,CRNKL1,CRY2,DBNDD1,DCP1A,E2F3,FAM162B,FBXO41,FBXW4,GAS1,GRHL2,IFI35,IGSF1,ITGB8,KLRC4-KLRK1/KLRK1,LETM1,LGR4,LPCAT1,LRRFIP1,MAP4K4,MECR,METAP1,MID1,MOAP1,MS4A2,MXD4,MYC,NAA50,NAGPA,NDUFAF6,NGB,NR1I2,NSD1,OAZ2,PALLD,PEX3,PFKFB3,PGF,PIK3R2,PLOD1,PRELID2,PSD3,PTPRR,RALGDS,RCAN1,RET,RRAGD,S1PR3,SHE,SLC35D2,SLC6A3,SNAI1,SOCS4…
ERK		group		1.773		6.53e-06	ACSL5,BTG2,CDK5R1,DIO2,DUSP1,FOS,HBEGF,IFNG,IL10,MAFF,MAP4K4,MYC,OSBPL10,PECAM1,PLAU,RRS1,SLC2A1,VEGFA,ZFP36	215 (17)
miR-144-3p (miRNAs w/seed ACAGUAU)		mature microrna	Activated	3.63	bias	6.84e-06	ADAMTS3,ALDOB,ANK3,ANTXR2,ARID2,ARL4C,ATAD2B,ATP2B2,BMPR1B,CADM2,CDH5,CDS2,CEBPA,CELF2,CXCL12,DCP1A,DICER1,DNAJC21,DUSP1,DYNC2LI1,E2F3,FAM193B,FLRT2,FLT1,FPGT,HEATR5A,HTRA3,ID4,ITGB8,KIF1B,KIF3A,LRPPRC,MEF2A,MXRA5,NCOA7,NFIA,NFIB,NIP7,NR2F2,NSD1,NT5DC1,PBRM1,PTHLH,PTPRG,RBM25,RET,RHPN2,RNF128,RRAGD,SLC19A2,SLC1A1,SOCS6,SPRED1,SRGAP1,SS18,STAMBP,STARD8,TMEM165,TMX4,TOP2A,TSHZ2,YLPM1,ZFX,ZMAT3
HNF1A		transcription regulator		0.108	bias	7.32e-06	A1CF,ACAT2,ALB,ALDOB,AMBP,ANPEP,CLDN2,CPN1,FAM107B,FAS,GLUL,GPATCH2,GPR39,HNMT,IGF1,IGF1R,KLF11,MCCC1,MTF2,MTHFD1,NOP16,PCSK1,PFKP,SLC37A4,SLPI,TBPL1,TRAPPC13,VLDLR,WDR46,WNK4	238 (13)
miR-218-5p (and other miRNAs w/seed UGUGCUU)		mature microrna	Activated	3.146	bias	7.5e-06	ACSL1,ANKRD44,ANTXR2,ATRN,BMPR1B,BTG2,CADM2,CALML4,CBL,CCNA2,CCP110,CLDN2,CLK3,CRNKL1,CXADR,DBNDD1,DESI2,DNAJC3,EDEM1,FAM162B,FAM65B,FBXO41,FLRT2,FLT1,GLDN,GPAM,HNMT,HOXA1,INTS6,KIAA1324,L3MBTL3,LGR4,LPCAT1,LRRFIP1,MEF2C,METTL21A,MID1,MTCH2,NAA50,NFIA,NUDT5,PAPOLA,PDE4DIP,PSD3,PTPRK,PTPRR,RBFA,RET,SAMD8,SCAMP5,SLC6A3,SOCS4,SOCS6,SPRED1,TAC1,TCF19,THOC2,TJP2,TOB1,TOR1AIP2,TSHZ2,TSPAN9,VGLL3,WDR33,…
acetaminophen		chemical drug		-0.372		7.53e-06	ABCB11,ALB,BTG2,CAST,DMBT1,FAS,FLT1,GADD45A,GLUL,IFNG,IGF1,IGF1R,KDR,MYC,PECAM1,VEGFA	226 (16)
CPE		peptidase				7.62e-06	LEP,MYC,OXT,PCSK2,PENK,TAC1,TRH	185 (17)
miR-130a-3p (and other miRNAs w/seed AGUGCAA)		mature microrna		1.156	bias	7.84e-06	AAK1,ACSL1,ANTXR2,ARL4A,ATP2B2,ATRN,BHLHE40,BMPR1B,CCT6A,CERCAM,CLN6,CNP,COL6A3,CXCL12,DICER1,DNAJC3,FAM107B,FAM155B,FBXO9,FBXW4,GADD45A,GGA2,GSE1,HCFC2,IGF1,INTS6,ITGB8,KLF11,LPGAT1,MAF,MAP3K9,MAP4K4,MAT2B,MED15,METAP1,NAA50,NFIA,NFIB,NOCT,PFKFB3,PHF12,PLLP,PPP6R2,PTPRG,RASA1,RBM25,RET,ROCK2,RRAGD,SAMD8,SAR1B,SLC2A1,SOCS6,SPRED1,STEAP4,TAC1,TBC1D8,TBPL1,TEX2,TPP1,TRIM3,TSHZ2,VGLL3,WDR33,ZMAT3
miR-623 (miRNAs w/seed UCCCUUG)		mature microrna	Activated	3.152	bias	8.21e-06	A1CF,AQP11,ATF6B,BBIP1,BTG2,CCDC3,CDH5,CLN6,COMMD9,CRNKL1,CXCL12,CXCL14,DLAT,EIF2S1,FAM171B,FLT1,GRHL2,HBEGF,HNMT,IVL,KIF3A,LRRC20,LRTOMT,LUZP1,MEF2C,NASP,NR2F2,PECAM1,PSD3,RASA1,RNLS,SAR1B,SLC25A22,SLC38A9,SORBS2,WWP2
CSF3		cytokine		1.477		8.27e-06	CAPG,CEBPA,CXCL12,FCGR1A,FOS,GADD45A,IFNG,IGF1,IL10,LTB,MYC,NFIL3,PLSCR1,SOCS1,TFDP1,TNFSF10,VEGFA	220 (20)
miR-4428 (miRNAs w/seed AAGGAGA)		mature microrna	Activated	3.453	bias	8.69e-06	A1CF,ADAR,AMD1,ANKRD37,CADM2,CELF2,CNP,DESI2,DLAT,DNAJC15,E2F3,EMB,ENSA,FAM122A,FAS,FOS,GCLM,GPX6,HEATR5A,HOXD3,MAF,MAP10,MCUR1,MS4A2,MSL1,NAA50,NASP,NFYC,NSFL1C,PARP9,PHF12,PPIG,PYGM,RBL1,RNF40,RRM2B,THOC2,TPCN2,VEGFA,VGLL3,VRK1
SB203580		chemical - kinase inhibitor		0.496	bias	8.73e-06	ARHGDIB,CDK5R1,CYP1A1,DUSP1,EHF,FLT1,FOS,IFI35,IFIT2,IFIT3,IFNG,IL10,IVL,KDR,MYC,MYOD1,NPHS2,PENK,PLAU,PTHLH,SLPI,SNAI1,STAR,TNFSF10	229 (19)
VEGFA	2.45	growth factor		-0.773		8.75e-06	ACSL1,ANPEP,CDH5,CXCL12,DECR1,E2F3,FLT1,FOS,HBEGF,IFNG,ITGA2,KDR,MEF2C,NOTCH4,NR2F2,PLAU,RCAN1,STARD8,TBC1D8,TJP2,VASH1,VEGFA	180 (20)
PLCG1		enzyme		0.339		8.79e-06	FOS,IFNG,IVL,KDR,PECAM1	206 (25)
nitrofurantoin		chemical drug		1.872		8.96e-06	ABCB11,ALB,AMBP,AMD1,ANXA5,BTG2,CP,FAS,GADD45A,GSS,IFNG,IGF1,IL10,KRT19,MYC,TYMS,VEGFA
lysophosphatidic acid		chemical - other		-0.133		9.21e-06	DUSP1,FOS,KDR,MYC,PLAU,PPP1R3B,S1PR3,SLC26A3,SOCS1,SPHK1,VEGFA	225 (22)
miR-365-3p (and other miRNAs w/seed AAUGCCC)		mature microrna	Activated	2.667	bias	9.34e-06	ADAR,ADM,ANK3,BTG2,CEP44,COMMD9,CSTF1,DLAT,EHF,ENPP1,EYA3,FBXL20,HDAC4,KIF1B,KIF3A,MAF,METTL21A,MSL3,MYCBP,NAA50,NEK2,NFIA,NFIB,NFIL3,NOLC1,NR2F2,OAZ2,PARP9,PDE4DIP,PHF12,PLEKHA8,RNLS,RRM2B,SLCO2B1,SRGAP1,TFDP1,TIGD2,TOP2A,USP37,VGLL3,ZFP36,ZNF280D,ZNF674
RAF1		kinase		-0.32	bias	9.38e-06	ACAT2,AKAP12,AMD1,CSTF1,DIO2,FAS,FOS,HBEGF,IGF1R,IL10,ITGA2,LHB,LPGAT1,MYC,PHLDA2,PLAU,PTHLH,RET,VASH1	220 (20)
miR-545-3p (miRNAs w/seed CAGCAAA)		mature microrna		1.228	bias	9.67e-06	ANK3,ANKRD44,ARL4A,BUB3,CADM1,CBL,CELF2,CYYR1,DDX42,DNAJC3,DUSP1,ENPP1,FAS,FBXO41,FLRT2,GGA2,HCFC2,HNMT,KIF1B,LPGAT1,LRP1,LRTOMT,MSL3,NANP,OSBPL10,PALLD,PLEKHA8,PTPRK,RASA1,RMI2,RNF128,RRM2B,S100PBP,SAR1B,SLCO2B1,SOCS6,SORBS2,TBC1D8,TFDP1,TNFSF10,USP37,WBP2,WDR33
SREBF1		transcription regulator		-0.747		9.75e-06	ACSL1,ACSL5,BHLHE40,CEBPA,COL6A1,FADS1,FAS,FASN,GPAM,IL10,LEP,MEF2C,MYOD1,PNPLA3,STAR,VEGFA	211 (22)
NRAS		enzyme		-0.159		9.99e-06	IFNG,ITGA2,KDR,PLAU,SESN1,SKP2,SLC2A1,VEGFA	203 (20)
miR-200b-3p (and other miRNAs w/seed AAUACUG)		mature microrna		0.121	bias	1e-05	A1CF,AAK1,ADAMTS3,ADGRF2,ANK3,ATAD2B,B3GALNT1,CADM1,CADM2,CBL,CCNA2,CDC27,CDK5R1,CELF2,DDIT4,DNAJB9,DNAJC3,DUSP1,E2F3,EGLN1,EIF2S1,FAM107B,FGF18,FLT1,FYN,GLRX,GSE1,HCFC2,HDAC4,HLCS,INTS6,KATNAL1,KCTD8,KDR,LFNG,LRP1,LTN1,MAF,MAMDC2,MAP4K4,MTF2,MXD4,NCOA7,NFIA,NFIB,PCSK2,PENK,PIP4K2A,PTHLH,ROCK2,S100PBP,SAMD8,SAR1B,SESN1,SOCS6,SPRED1,SRGAP1,TOB1,TOR1AIP2,VASH1,VEGFA,VLDLR,ZMAT3,ZNF395
miR-2355-5p (miRNAs w/seed UCCCCAG)		mature microrna	Activated	3.27	bias	1.01e-05	ABI3,ACSL5,ADAM19,AQP11,AREL1,BNC1,BRF2,BTG2,CBL,CCDC3,CDH3,CDK5R1,DBNDD1,DENND4B,DPT,EML4,ENTPD5,FAF2,FAM134A,FAM155B,FXYD6,GJA4,GRHL2,HBEGF,HLCS,HOXA1,HR,HTRA3,IFNG,IKBKG,ITGA6,KCNE3,KCTD11,KIAA1644,KLF1,LAMC2,LPGAT1,LYRM4,MAF,MECR,MEF2C,MID1,MS4A2,MXRA5,MYO19,NAGPA,NDUFAF6,NFIA,NIP7,NR4A3,NT5DC1,PARP9,PDE4DIP,PHLDB2,PIGC,PODNL1,RBFA,RBM25,RET,RUNDC3A,SLC35F2,SLC6A3,SORBS2,TCEB3,TMEM19,TMEM201,…
miR-3977 (miRNAs w/seed UGCUUCA)		mature microrna		1.416	bias	1.06e-05	ACSL5,AMD1,ATAD2B,CADM2,CDH5,CEP44,COMMD9,CXCL14,DGUOK,DNAJC21,ENC1,FAM122A,FAM171B,GPATCH2,GSE1,HEATR5A,HN1,HOXA1,ITGA6,KCTD8,LEP,LTN1,MSL1,NOLC1,PALLD,PEX12,PGM3,PQLC1,RNLS,ROCK2,RRAGD,SAMD8,SAR1B,SPTLC2,TAC1,TOR1AIP2,TPST1,WIPF2,WWP1,ZFX,ZNF32,ZNF674
PPP1R14B		phosphatase		-0.152		1.08e-05	FLT1,KDR,PECAM1,VEGFA
camptothecin		chemical drug	Activated	2.2		1.09e-05	AKAP9,ARL4A,CAST,CD93,CIDEA,CYTH2,FAS,FLT1,FOS,GADD45A,MAP4K4,MEF2C,MOAP1,PECAM1,PEG3,PHLDA2,PIK3C2B,PTP4A2,RASA1,RBL1,RRAGD,RRM2B,SLPI,STAMBP,VEGFA	224 (21)
miR-105-5p (and other miRNAs w/seed CAAAUGC)		mature microrna	Activated	2.515	bias	1.11e-05	ADGRF2,ATAD2B,CBL,COMMD9,CP,CRYZL1,ENC1,ENPP1,FCER1A,FLRT2,GPAM,INTS6,ITGA6,KDR,MEF2C,METAP1,MTCH2,NASP,NCAPG,ODF2L,PGM3,PTHLH,SLC11A2,SRSF11,TEX2,USP37,WWP1,YLPM1,ZNF674,ZNHIT6
miR-646 (miRNAs w/seed AGCAGCU)		mature microrna	Activated	3.544	bias	1.12e-05	A1CF,ACSBG1,AHCTF1,AK3,AKAP12,ALDOB,APOA4,AREL1,ARSA,BAG3,BTG2,BUB3,CALML4,CDC27,DENND4B,DKC1,E2F3,ENC1,ENPP1,ENSA,FLT1,GSS,IGF1R,ITGB8,LPAR3,MACF1,MAMDC2,MRPS23,MTAP,MYCBP,NFYC,NSD1,PEX12,PLEKHA8,PPRC1,PTPRR,RNF128,S1PR3,SAMD8,SLC11A2,TMEM248,TMTC4,TNFSF10,TPCN2,TTLL12,VSTM4,WWP2,XPO7,ZFP1,ZNF280D,ZNHIT6
PTGS2		enzyme		0.328		1.15e-05	CXCL12,CXCL14,CYP19A1,DUSP1,FLT1,FOS,IGF1,IL10,ITGA6,KDR,LEP,MYC,SNAI1,STAR,TNFSF10,VEGFA	220 (17)
miR-421-3p (and other miRNAs w/seed UCAACAG)		mature microrna	Activated	2.057	bias	1.2e-05	ACSM3,ANKRD44,ARL4A,ARL4C,ATAD2B,BCLAF1,BTG2,CADM2,CBL,CCT6A,DMBT1,EIF2S1,ENPP1,FAM122A,FLRT2,GAS7,GSE1,HDAC4,HLCS,KLF11,LPGAT1,MEF2C,MTAP,NAA50,NFIA,NFIB,NMB,NOLC1,NRCAM,OAF,OSBPL8,PARP11,PDE4DIP,PECAM1,PIP4K2A,PIPOX,PNPLA3,RASA1,RHPN2,RNF128,RRM2B,SAMD8,SERPINB11,TOR1AIP2,TTC9,TXNDC15,VGLL3,WDR33,ZMAT3
propranolol		chemical drug		-0.705		1.23e-05	CYP1A1,DIO2,DUSP1,FOS,IGF1,LEP,MYC,VEGFA	225 (22)
miR-1285-3p (and other miRNAs w/seed CUGGGCA)		mature microrna	Activated	3.391	bias	1.23e-05	AAK1,ADAM19,AK3,AKAP12,AKIP1,ALOX15,AMD1,AMER3,ARSA,CAMK2N2,CCP110,CD247,CDS2,CEP44,CERCAM,CIDEA,CLN6,CNP,CYFIP2,DENND4B,ENO2,ERO1A,FAM155B,FBXL20,FBXO41,FCRL5,GLUL,GLYR1,GPATCH2,GRHL2,ID4,IFI35,IRF6,KHK,KIAA1324,LAMC2,LETM1,LPCAT3,LRTOMT,MAFF,MCUR1,MEF2C,MRI1,MTHFD1,MYBPC1,NANP,NEK2,NSFL1C,PHLDB2,PLAU,PLOD1,PODNL1,PPP6R2,PSD3,PTOV1,PUS1,QPCTL,RET,RPS19BP1,RUNDC3A,S1PR5,SAR1B,SCARA5,SHE,SLC11A2,S…
SMARCB1		transcription regulator		1.103		1.25e-05	ACSL1,BAG3,BNIP3,CCNA2,FAS,FCGR1A,FOS,GADD45A,HBEGF,IFI16,MYC,SKP2,SLC37A4,SMC4,TCF21,TFDP1	159 (7)
KLF4		transcription regulator		1.482		1.28e-05	ALB,CYP1A1,DUSP1,FLT1,IFITM3,IL10,IRF6,IVL,KDR,KRT19,MEF2C,MYC,NOTCH4,PECAM1,PEG3,SLPI,SOCS1,SPHK1,VEGFA,WLS	176 (21)
valproic acid		chemical drug		-1.532		1.34e-05	ANK3,APOA4,CACYBP,CDS2,CEBPA,CPT1C,CXADR,CYP19A1,DICER1,FAS,GPAM,IFNG,IGF1R,LEP,LHB,NPC2,OSBPL8,PNPLA3,PRKCZ,SLC1A1,STAR,TNFSF10	254 (22)
miR-4435 (miRNAs w/seed UGGCCAG)		mature microrna	Activated	2.389	bias	1.36e-05	ADAR,AIFM2,AKAP12,ANXA5,AP1M1,ARSA,ASB13,CACYBP,DRAM2,EXOSC2,FAAP24,FADS1,FADS6,FAM107B,FAM122A,FAM134A,FAM65B,FLRT2,GJA4,HILPDA,HOXA1,HTR1D,IFIT2,IGF1,INIP,KDR,KIF1B,KIF3A,LAMC2,LEP,LRPPRC,MAB21L3,MAP4K4,MCUR1,METTL21A,MSL1,MTHFD1,NAGPA,NANP,NIP7,NPC2,NUDT5,ODF2L,PIK3R2,PIPOX,PLBD2,PNPLA3,PQLC2,PRELID2,RET,RRM2B,S1PR3,SLC2A3,SLCO2B1,SMIM11A,SNAI1,SPRED1,STAMBP,TBC1D32,TCF21,TMEM201,TSHZ2,VLDLR,V…
RELA		transcription regulator		1.546		1.44e-05	ARHGDIB,CYP19A1,CYP1A1,DIO2,DUSP1,EGLN1,EHF,EWSR1,FAS,FOS,IFNG,IGF1,IGF1R,IL10,MAT2A,MGMT,MYC,MYOD1,NMI,PECAM1,PLAU,SNAI1,STAR,STIM1,TAC1,VEGFA	234 (20)
miR-3907 (miRNAs w/seed GGUGCUC)		mature microrna	Activated	2.214	bias	1.45e-05	AAK1,ABHD6,ADAR,ADGRA3,AK3,AMER3,ARID2,DPT,EDEM1,ENO2,ENPP1,ENSA,FBXO9,GPAM,HILPDA,IGSF1,KCTD11,LEP,LUZP1,MAMDC2,MCUR1,MED15,MXD4,NCAPG,NNT,PALLD,PARP11,PDE4DIP,PHACTR1,PNMA1,SCARA5,SLC2A3,SLC37A4,SNAPC5,SORBS2,SRGAP1,TBPL1,TCF19,TMEM201,TMEM248,TMTC4,TTLL12,ZFX
ADRB		group		1.664		1.46e-05	ACAT2,ANXA5,BHLHE40,BNIP3,CCNA2,DDIT4,DIO2,E2F3,FAS,GADD45A,GCLM,IFIT3,IKBKG,NEK2,NR4A3	123 (11)
miR-4436b-3p (and other miRNAs w/seed AGGGCAG)		mature microrna		1.132	bias	1.53e-05	AK3,ARL4A,ARL4C,ASB13,B3GALNT1,CD2,CEP44,CLDN2,CYTH2,DCP1A,DEGS2,DESI2,DNAJB9,DPT,DTX4,FAM155B,FAS,FBXO41,GAS7,GLT8D1,GRHL2,HR,HTRA3,IDE,IGF1R,LRPPRC,LRRC20,LUZP1,MAB21L3,MAT2A,MEF2A,MGMT,NFYC,PGF,PIK3R2,PIPOX,PKIG,PLBD2,PLEKHA8,POLR3A,PRSS12,RASSF1,RNF40,RRM2B,RXRA,S100PBP,SLC13A4,SLC25A22,SLC2A1,SMC4,SOCS4,SORBS2,SPTLC2,TAC4,TEX2,TMEM201,TOR1AIP2,TPP1,TSPAN9,VASH1,WDR26,WIPF2,ZER1,ZMAT3,ZNF322
actinomycin D		chemical drug		-1.548		1.55e-05	ADM,CYP1A1,DUSP1,FOS,GADD45A,GAPDH,HBEGF,IGF1R,MYC,PFKFB3,PLAU,POU1F1,ROCK2,RRM2B,SLC27A1,SPHK1,VEGFA	234 (22)
miR-1964-5p (and other miRNAs w/seed GCUGGAG)		mature microrna	Activated	2.451	bias	1.59e-05	AAK1,ADAR,AK3,AMER3,AQP11,ARSA,ASB13,ATRN,CACYBP,CLDN2,DICER1,DLAT,ENPP1,EXOSC2,FAAP24,FADS1,FBXL20,FCRL5,FLT1,GCLM,GINS4,HEATR5A,IDE,IL10,INIP,KIF1B,KLRC4-KLRK1/KLRK1,LAMC2,LPCAT1,MAFF,MAP3K9,MAT2A,MCUR1,MRI1,MSC,MXRA5,NAA40,NANP,NFYC,NOL6,NSFL1C,PARP9,PEX3,PHACTR1,PLBD2,PNPLA3,POLR3A,PQLC2,PTHLH,QPCTL,RHPN2,RNLS,ROCK2,S100B,SLC1A1,SLC27A1,SLCO2B1,SMIM11A,SNAI1,TCF21,TSPAN9,TXNDC15,UBE2F,URM1,VS…
methapyrilene		chemical drug		1.667		1.6e-05	ALB,ALDOB,AMBP,ANXA5,BTG2,CP,DECR1,EIF2S1,GADD45A,GSS,IGF1,MYC,NFIB,NSFL1C,SLC3A2
miR-541-3p (and other miRNAs w/seed GGUGGGC)		mature microrna	Activated	2.264	bias	1.61e-05	ABI3,AIFM2,AMER3,ANTXR2,AP1M1,ATRN,BBIP1,BCLAF1,CD2,CLN6,COL6A1,CXADR,DTX3L,ENTPD5,EYA3,FADS6,FAF2,FAM155B,FBXL20,FGF18,FLRT2,GAS7,GJA4,GLYR1,GPR39,GRHL2,IGF1,KCTD11,KHK,LFNG,LRRC20,LRRFIP1,LRTOMT,MAF,MAP3K9,MED15,MS4A2,MSL3,MTAP,MTSS1,MYCBP,NFIA,NFYC,NOTCH4,OAZ2,OSBPL10,PARP9,PHF12,PODNL1,PTP4A2,RAMP2,RET,RGS12,RXRA,S100PBP,SCAMP5,SCARA5,SESN2,SLC16A3,SLC25A20,SLC35F2,STAMBP,STIM1,TCF21,TMCC3,TR…
prostaglandin E2		chemical - endogenous mammalian		1.242		1.64e-05	ALOX15,CXCL12,CYP19A1,FAS,FASN,FLT1,FOS,IFNG,IGF1,IGF1R,IL10,KLRC4-KLRK1/KLRK1,MYC,NFIL3,PENK,PGF,PLAU,RGS2,SPHK1,STAR,VEGFA	235 (19)
miR-425-5p (and other miRNAs w/seed AUGACAC)		mature microrna	Activated	2.461	bias	1.65e-05	ADAR,ANK3,ANKRD46,AQP11,B3GALNT1,BCLAF1,CADM2,CBL,CYGB,CYYR1,DICER1,DMBT1,FAS,FBXO41,GLRX,HOXD8,HSPH1,IGF1,KIAA1644,LYRM4,MEF2C,MID1,MOAP1,NDUFA5,ODF2L,PARP11,PEX12,POLR1D,PTHLH,PTP4A2,SLC25A20,SLC35F2,SRSF11,TOR1AIP2,TP53RK,ZMAT3
miR-4314 (and other miRNAs w/seed UCUGGGA)		mature microrna		1.473	bias	1.73e-05	AAK1,ANK3,AP1M1,ARL4C,BMPR1B,BNC1,BUB3,CD93,CDC23,CDH3,CDK5R1,COL6A3,COMMD9,CRY2,CXCL12,CYP19A1,DDX42,DMBT1,ENSA,FAF2,FAM65B,FBXO7,FCRL5,FGF18,GAS7,GLT8D1,GPATCH4,GPR39,GRHL2,ITGB8,KIF1B,KLF1,METAP1,METTL21A,MTHFD1,NAA50,NANP,NOL6,ODF2L,PCSK1,PECAM1,PIK3C2B,PIPOX,PKIG,PTP4A2,RCAN3,ROCK2,SNAI1,UBE2F,VLDLR,VSTM4,XPO7,ZNF630,ZNF674
wortmannin		chemical - kinase inhibitor		0.286		1.74e-05	ANPEP,CIDEA,E2F3,FASN,FOS,IDE,IFNG,IGF1,IGF1R,IL10,LEP,MYC,NR4A3,PLAU,TNFSF10,VEGFA	218 (18)
CNR1		g-protein coupled receptor		-1.567		1.74e-05	CA9,FASN,FOS,HSPA4,IFNG,IGF1,IGF1R,IL10,LEP,NPHS2,PECAM1,PENK,PLAU,PLSCR1,S100B	261 (22)
miR-3193 (miRNAs w/seed CCUGCGU)		mature microrna	Activated	2.623	bias	1.85e-05	ADPRHL2,ANKRD10,CADM2,CD247,DESI2,DNAJC21,EML4,EYA3,FAM65B,FLT1,GSE1,IGF1,KATNAL1,LEP,LETM1,NCK2,PACSIN2,PARP9,PQLC1,PQLC2,QPCTL,RNF40,ROCK2,TCF21,TSTD2,WAS
miR-4470 (miRNAs w/seed GGCAAAC)		mature microrna	Activated	3.617	bias	1.89e-05	ADM,ADPRHL2,AKIP1,ARL4A,CADM2,CAST,CELF2,CXCL12,DTX4,EGLN1,EMB,FAM65B,FLT1,GLRX,GRHL2,IGF1R,KIF3A,KLF11,LRPPRC,LRRC20,LTN1,MRPS23,MSL3,MTHFD1,MYBPC1,NR1I2,NRCAM,PTPRG,S1PR3,SMC4,SORBS2,TARBP1,WDR33,WIPF2,ZFX,ZMAT3,ZNF322,ZNF382
IGF1R	-1.8	transmembrane receptor		-0.901		1.99e-05	ACSL1,CAPG,CD93,CEBPA,FASN,FOS,IGF1,IGF1R,KRT19,MYOD1,PHLDA2,RRAGC,SCARA5,SLC25A20,SNAI1,STAR,TFDP1,TYMS,VEGFA	225 (22)
etoposide		chemical drug		0.162		2e-05	CEBPA,DDIT4,FAS,FASN,GADD45A,IFIT2,IFNG,IL10,SLC2A1,SLC2A3,SPHK1,TNFSF10,TOP2A	199 (18)
miR-1207-5p (and other miRNAs w/seed GGCAGGG)		mature microrna		1.67	bias	2e-05	ADAM19,AIFM2,ALKBH5,AMOT,ANK3,AP1M1,APOA4,AREL1,ARHGDIB,ARSA,ATRN,BTG2,CBL,CCP110,CD3E,CDH5,CDK5R1,CERCAM,CLDN2,CLN6,COL6A3,CXCL12,CYFIP2,DICER1,DNAJC3,DTX4,EIF4EBP1,ENTPD5,FAM134A,FAM155B,FASN,FBXO41,FCGR1A,FGF18,FLT1,GAPDH,GAS7,GGA2,GLRX,GPX6,GRHL2,GSS,GYS1,HBEGF,HSPA4,HTRA3,HYAL2,IFIT3,IGF1,IGF1R,KATNAL1,KHK,KLRC4-KLRK1/KLRK1,LFNG,LPCAT1,LRP1,LRRC20,LRRC8C,LRRFIP1,MED15,METTL21A,MRPS23,MSL3,MT…
miR-3918 (miRNAs w/seed CAGGGCC)		mature microrna		1.949	bias	2.05e-05	ABHD5,AIFM2,AK3,ALKBH5,AMER3,ANKRD46,ANKS3,ARSA,ASB13,CD3E,CLDN2,CLN6,COL6A1,CRY2,CXCL12,CYFIP2,DBNDD1,DIO2,DNAJC3,DROSHA,EXOSC2,FAM155B,FAM193B,FAM65B,FCRL5,GAS7,GINS4,GJA4,GLDN,GLRX,IGSF1,KIAA1644,KLF1,LEP,LPCAT1,LPCAT3,LRPPRC,LRRC20,MAFF,MECR,MID1,MSL1,NR1I2,PECAM1,PGF,PHACTR1,PIK3C2B,PLBD2,PQLC1,RET,RHPN2,RRAGD,S100PBP,S1PR5,SCAMP3,SCAMP5,SLC27A1,SLC37A4,SLCO2B1,SMOX,STAR,TCAP,TCF19,TMEM201,T…
miR-4776-3p (miRNAs w/seed UUGCCAU)		mature microrna		1.785	bias	2.08e-05	AAK1,ALOX15,ANK3,APITD1/APITD1-CORT,CALML4,CDC27,CP,DICER1,DTX4,FAF2,FAIM,GLYR1,ID4,IFIT2,LAMC2,LUZP1,MAF,MAP4K4,METAP1,MSL3,NAA40,NFIA,NR4A3,NUP85,OSBPL8,PCSK2,PIK3R2,PRSS12,RRAGC,SAMD8,SNAPC5,TMEM19,TOR1AIP2,VGLL3,VLDLR,XPO7,ZMAT3,ZNF322,ZNF674
IKBKB		kinase		0.99		2.09e-05	CCNA2,CP,CXCL12,EGLN1,FAS,FASN,FOS,FYN,GADD45A,IFI16,IFNG,IL10,LTB,MYC,NOCT,PLAU,RCAN1,SKP2,SNAI1,SOCS1,VEGFA	222 (16)
CHUK		kinase		-0.587	bias	2.09e-05	CCL21,CP,CXCL12,CXCL13,DNMT1,FAS,FOS,IFI16,IFI35,IFIT2,IFNG,IL10,MYC,NOCT,PLSCR1,RCAN1,VEGFA	243 (20)
SP600125		chemical - kinase inhibitor		-0.667		2.09e-05	ACAT2,ADM,CDK5R1,CYP1A1,DDIT4,DNMT1,FAS,FOS,IFNG,IL10,ITGA2,ITGA6,LEP,MYOD1,NPHS2,VEGFA,ZFP36	218 (18)
miR-4503 (miRNAs w/seed UUAAGCA)		mature microrna		1.511	bias	2.12e-05	AK3,AMOT,CELF2,CEP70,CXCL13,EEF1E1,EHF,EMB,HDAC4,IDE,INTS10,KIF3A,L3MBTL3,LRTOMT,MAP10,MID1,MYBPC1,MYCBP,OSBPL10,PACSIN2,RRM2B,SERPINB11,SKP2,SLC1A1,SOCS4,SRSF6,STBD1,TMEM201,TNFSF13,TOR1AIP2,UBTF,VSTM4,WLS,ZNHIT6
miR-4325 (miRNAs w/seed UGCACUU)		mature microrna	Activated	2.517	bias	2.13e-05	ADM,ANTXR2,ASB13,BUB3,CD93,DNAJB9,DNAJC21,EML4,FAM65B,HSPA4,IDE,IFITM3,LRRC8C,MRPS33,MSL1,MTF2,NFIA,NMI,NNT,NR2F2,NR4A3,NRCAM,NUP54,OSBPL10,PALLD,PIP4K2A,POLR1D,PTPRK,RRM2B,SLC11A2,SORBS2,SPRED1,TCF21,TFDP1,TIA1,TRAPPC13,WWP1
miR-3083-5p (and other miRNAs w/seed GGCUGGG)		mature microrna	Activated	3.211	bias	2.14e-05	AAK1,ABHD6,ADAM19,ADAR,AMER3,AP1M1,ARSA,ATP2B2,BTG2,CAMK2N2,CCDC3,CDK5R1,CEBPA,CELF2,CLN6,CNP,CP,CRY2,CXADR,CYTH2,DCP1A,DDX42,DTX3L,EIF4EBP1,ENSA,FAM155B,FBXO41,FBXO9,FLT1,GPATCH4,GPX6,HR,HRH1,IGSF1,IRF2BP1,IRF6,ITGA2,KCNE3,KIF3A,LEP,LRP1,LRRFIP1,LYRM4,MAFF,MCUR1,MID1,MON1A,MXD4,MXRA5,NAA40,NCOA7,NEK2,NELFA,NFIB,NGB,NOL6,PCSK1,PGF,PGM3,PNPLA3,POLR3A,PPAN,PPP1R13L,PPP1R3B,PPP1R7,R3HDM4,RET,RGS12,R…
miR-3929 (and other miRNAs w/seed AGGCUGA)		mature microrna		0.158	bias	2.18e-05	A1CF,ALB,AMD1,CCDC3,CDA,CDC23,CLN6,CRNKL1,CYP1A1,CYTH2,DROSHA,DTX3L,FADS1,FAM188A,FBXL20,FCRL5,GGA2,GSS,KIAA1324,LRTOMT,MSL3,MTHFD1,MTSS1,NEK2,NFIB,PARP11,PDE4DIP,PEX12,PHYHD1,PQLC1,PSD3,RGS2,ROCK2,SDCBP2,SHE,SLC11A2,SLC27A1,SLC2A1,SLCO2B1,SRGAP1,TMCC3,TNFSF10,TRH,WDR33,ZFP1
HRAS		enzyme		-0.152		2.24e-05	ADM,BNIP3,BTG2,CAPG,CCNA2,CDH3,CXCL12,CYP1A1,DNMT1,ENPP1,FAS,FASN,FLRT2,FOS,IFNG,IGF1R,ITGA6,IVL,KRT19,MYC,MYOD1,NSFL1C,PGF,PLAU,PLOD1,PTHLH,RGS12,SESN1,SNAI1,TOP2A,VEGFA	198 (17)
dihydrotestosterone		chemical - endogenous mammalian		0.336		2.25e-05	ADM,BTG2,CACYBP,CCNA2,CEBPA,COL6A1,CYP19A1,EIF4EBP1,FASN,GAPDH,GLUL,IGF1,IGF1R,IL10,ITGA2,KRT19,LEP,LHB,MYOD1,OXT,PTHLH,SLC2A1,SLC2A3,STAR,VEGFA,VLDLR	231 (22)
IgG		complex		-1.73		2.38e-05	ADM,ATP1B3,DUSP1,FCGR1A,IFITM3,IFNG,IL10,ITGB8,IVL,MYC,PHLDA2,SLC2A3,TNFRSF17,TOB1,VEGFA,ZFP36	154 (17)
ZBTB7A	-1.76	transcription regulator				2.4e-05	DMBT1,FOS,MYC,PFKP,RBL1,SLC2A3	132 (7)
miR-1915-3p (and other miRNAs w/seed CCCAGGG)		mature microrna	Activated	3.204	bias	2.4e-05	ADGRF2,ADPRHL2,AMER3,AREL1,BNC1,BRF2,BTG2,CALML4,CAMK2N2,CBL,CCP110,CD247,CDK5R1,CIDEA,CLDN2,CYP1A1,CYTH2,DPT,DROSHA,EIF4G1,EMILIN1,FAF2,FAM57A,FCRL5,FGF18,FLT1,FXYD4,HR,HYAL2,IKBKG,KCTD11,KLF1,LRRC20,LUZP1,MACF1,MAFF,MID1,MSL3,NAA40,NAT9,NOL6,NOLC1,NR1I2,OAZ2,PFKFB3,PGF,PIK3C2B,PLEKHA8,POLR3A,PPP1R13L,PTOV1,QSOX1,RALGDS,RBFA,RET,RHPN2,RNF40,S1PR5,SAMD8,SCAMP5,SESN2,SLC16A3,SLC25A22,SLC35F2,SLCO2…
miR-6859-5p (and other miRNAs w/seed AGAGGAA)		mature microrna		1.697	bias	2.41e-05	ADAR,AIFM2,AKAP12,ALOX15,ASB13,BMPR1B,BNIP3,CCNA2,CCP110,CEP44,CLEC14A,COL6A3,COMMD9,EML4,ENO2,ENTPD5,FAF2,FAM107B,FAM65B,FBXO7,GLRX,GSE1,HCFC2,IGF1,IGF1R,IGSF1,INTS6,KIAA1324,KIF3A,NAA40,NR2F2,NRCAM,PCSK1,PECAM1,RNLS,RRM2B,SHE,STAMBP,TMEM19,TMEM39A,USP37,WWP1,XPO7,YLPM1
Pkc(s)		group	Activated	2.288		2.41e-05	ADM,CYP19A1,CYP1A1,DUSP1,FOS,IL10,IRF6,IVL,LHB,NOTCH4,NR4A3,POU1F1,RBL1,RGS2,SLC6A3,STAR,VEGFA	228 (23)
miR-153-3p (miRNAs w/seed UGCAUAG)		mature microrna	Activated	3.484	bias	2.55e-05	A1CF,AAK1,ADAM19,ANK3,ANKRD10,ARL4A,ATAD2B,ATP1B3,ATP2B2,CADM2,CD93,CELF2,CYFIP2,DCP1A,DDIT4,DESI2,E2F3,EMB,FLRT2,GTF2F2,HCFC2,HLCS,HRH1,IDE,IGF1R,LPGAT1,MAT2A,MEF2A,MEF2C,METAP1,MS4A2,MTF2,MYCBP,NAA50,NFIA,NFIB,PALLD,PPRC1,RASA1,ROCK2,S1PR3,SAR1B,SCAMP5,SNAI1,SPRED1,SS18,STAR,TIA1,TNFSF10,WDR26,WIPF2,WWP1,ZMAT3
NCOA1		transcription regulator		-0.059		2.55e-05	ABCB11,CEBPA,CYP1A1,IGF1,KDR,LEP,LHB,MYC,OXT,SLC2A1	213 (22)
DLX4		transcription regulator				2.56e-05	HBB,TOP2A,VEGFA
GRB10		other				2.56e-05	FOS,IGF1,KDR	205 (22)
cetuximab/radiotherapy		biologic drug				2.56e-05	FLT1,KDR,TYMS
SCD		enzyme		0.072		2.61e-05	DIO2,FASN,GPAM,IFNG,LEP,SLC25A14,SLC27A1,SLC2A1,SPTLC2	174 (22)
IFNA2		cytokine		-1.141	bias	2.68e-05	CXCL13,ENPP1,FAM65B,FAS,IFI16,IFIT2,IFNG,IL10,MYC,PLSCR1,RBL1,SOCS1,TNFSF10	195 (16)
miR-665 (and other miRNAs w/seed CCAGGAG)		mature microrna		1.724	bias	2.73e-05	A1CF,ALKBH5,AP1M1,ARL4A,ASB13,ATP2B2,BMPR1B,CCDC3,CNP,CP,CRNKL1,CRY2,CXCL12,DPF2,DPT,E2F3,EHF,ENO2,F2,FBXO41,FBXW4,FCRL5,GJA4,GPAM,GRHL2,HOXA1,HRH1,KDR,KIAA1324,KLF1,LHB,LUZP1,MAB21L3,MEF2A,NAA40,NAT9,NSFL1C,PDE4DIP,PHYHD1,PLEKHA8,PLOD1,POLR3A,PPP1R13L,PYGM,S100B,S1PR5,SCAMP5,SESN2,SLC27A1,SLC2A3,SLC35F2,SPRED1,TJP2,TNFSF10,TOR1AIP2,TSTD2,TTLL12,WDR33,WWP2,XPO7,ZER1,ZFP1,ZFYVE1,ZNF395
LEP	-4.3	growth factor		1.954		2.74e-05	ABCB11,ACSL5,ALDOB,APOA4,CCNA2,CIDEA,CYP19A1,FAS,FASN,FLT1,FOS,GAPDH,GPAM,IFNG,IGF1,IL10,KIF3A,LEP,MYC,MYOD1,PCSK1,PCSK2,PECAM1,SLC27A1,STAR,TRH,VEGFA,ZFP36	230 (21)
GATA3		transcription regulator		1.419		2.77e-05	ADM,CD3E,CEBPA,FOS,GLUL,IFNG,IL10,IRF6,LTB,MAF,MYC,NFIL3,RCAN1,RET,SLPI,TJP2	161 (17)
miR-4271 (and other miRNAs w/seed GGGGAAG)		mature microrna		1.769	bias	2.81e-05	ABHD5,ADAM19,AP1M1,AREL1,CDA,CDS2,CELF2,CLK3,CNP,CXCL13,CYGB,DNAJC21,EIF4EBP1,FADS6,FAM122A,FAM171B,FBXO41,GLUL,GLYR1,GSS,HBEGF,HNMT,HTR1D,HTRA3,INIP,IVL,KHK,KIF3A,LGMN,LGR4,LRPPRC,LUZP1,MAB21L3,MAF,MAT2A,MECR,METTL21A,MSC,MXRA5,NAA40,NAA50,NCOA7,OAF,PAPOLA,PATL1,PGF,PHACTR1,PHF12,PLEKHA8,PLOD1,PNPLA3,PRSS12,PTHLH,RAMP2,RBFA,RRM2B,S1PR3,SCAMP5,SHE,SLC27A1,SLC6A3,SNAI1,SPRED1,SRGAP1,STAMBP,TJP2,TM…
EP300		transcription regulator		0.275	bias	2.81e-05	AKAP12,AQP11,BCLAF1,CAPG,CBL,CEBPA,CYP19A1,CYP1A1,DUSP1,FASN,HBB,IGF1,IGF1R,IRF6,ITGA6,KDR,KIF1B,LAMC2,LEP,LHB,MAF,MEF2C,MYC,PIPOX,SLC27A1,SPHK1,VEGFA	214 (19)
miR-330-3p (and other miRNAs w/seed CAAAGCA)		mature microrna	Activated	2.5	bias	2.82e-05	ABHD17C,ANKRD37,CD93,COL6A3,CXADR,DIO2,EDEM1,ENSA,FAM107B,FBXW4,FPGT,GLYR1,HEATR1,HOXD8,HSPH1,KCTD8,LRPPRC,LTN1,MAT2A,MCAT,MEF2A,MRPS23,MYBPC1,NR2C1,PAPOLA,PLSCR1,PQLC1,PSD3,RASA1,RBL1,RCAN1,SF3B1,STEAP4,TAC1,TP53RK,VGLL3,YLPM1,ZMAT3,ZNF280D
6-hydroxydopamine		chemical toxicant	Activated	2.06		2.85e-05	CXCL13,DDIT4,FOS,HSPA4,IFNG,IL10,PENK,S100B,SLC6A3,TAC1,ZMAT3	231 (23)
ADIPOQ		other		-0.742		2.85e-05	ACSL1,ACSL5,CEBPA,CYP19A1,DUSP1,FADS6,FASN,FOS,HBEGF,IFNG,IL10,LEP,SLC27A1,SLC2A3	252 (24)
miR-943 (miRNAs w/seed UGACUGU)		mature microrna	Activated	3.788	bias	2.86e-05	ABCB11,ALDOB,CLN6,COA7,EEF1E1,GGA2,GLDN,GTF2F2,KIAA1644,L3MBTL3,LRRC8C,MRPS33,MS4A2,MYCBP,NFIA,NRCAM,NSFL1C,NT5DC1,PLEKHA8,RBL1,SLC11A2,SLC25A20,SRGAP1,TCF21,TIA1,TMEM165,TOP2A,TTLL12,USP37,ZFX,ZNF280D
miR-4780 (miRNAs w/seed CCCUUGA)		mature microrna	Activated	3.131	bias	2.88e-05	A1CF,ACSL1,AKAP12,AQP11,BBIP1,BTG2,CCDC3,CDH5,CLN6,COMMD9,DNAJC21,EHF,FAM171B,FLT1,GRHL2,HBEGF,HLCS,HNMT,KIF3A,LRTOMT,LTN1,MAB21L3,MEF2C,NNT,NR2F2,PARP9,PIK3C2B,PPP1R3B,PTHLH,RASA1,RXRA,SLC38A9,SS18,TMX4,WDR33
CTNNB1		transcription regulator		0.675	bias	2.88e-05	ARL4A,BHLHE40,CADM1,CCNA2,CEBPA,CLDN2,CXCL12,CYFIP2,CYP19A1,DIO2,ENPP1,FAS,FOS,GLUL,GRHL2,HILPDA,ID4,IL10,INHA,ITGA6,LAMC2,LFNG,LHB,MYBPC1,MYC,NPHS2,NRCAM,PEG3,PHLDA2,PLAU,SESN1,SH2B2,SNAI1,TIA1,TNFSF10,TRH,VEGFA,ZBTB7A	235 (24)
miR-3909 (and other miRNAs w/seed GUCCUCU)		mature microrna	Activated	2.388	bias	2.93e-05	AAK1,ACAT2,AREL1,ASB13,BMPR1B,CBL,CD2,CYTH2,DNAJC15,ENPP1,FAM107B,FCRL5,FLT1,GYS1,HBEGF,HRH1,HTRA3,IGF1,LPAR3,MED15,MEF2C,MRI1,NR2F2,NSFL1C,ODF2L,PHF12,PIK3C2B,PLLP,RALGDS,RBM25,RHPN2,SCARA5,SHE,SLC6A3,SNAPC5,TAC4,TCEB3,TMEM86A,TOP2A,TPP1,TSPAN9,VSTM4,ZNF322
di(2-ethylhexyl) phthalate		chemical toxicant		-0.16		3.04e-05	ALOX15,CYP19A1,FOS,IKBKG,LHB,MYC,SLC27A1,SLCO2B1,ZFP36	169 (12)
Interferon alpha		group		-0.431		3.08e-05	ADAM19,ADAR,ANXA5,DDIT4,FAS,FASN,FCER1A,FCGR1A,IFI16,IFI35,IFIT2,IFIT3,IFITM3,IFNG,IL10,MYC,NFIL3,NMI,PTHLH,SLC2A3,SOCS1,TNFSF10,TYMS	180 (15)
PRKCD		kinase		1.504		3.2e-05	BNIP3,CCNA2,CXCL12,FOS,IL10,IVL,PLSCR1,RCAN1,STAR,VEGFA,ZFP36	182 (17)
miR-4475 (miRNAs w/seed AAGGGAC)		mature microrna		1.921	bias	3.21e-05	ABHD6,ADAR,ANKRD46,CDC23,CEP44,CYGB,E2F3,EML4,ENSA,EYA3,FAM107B,GPX6,GRHL2,HEATR1,KLF1,LUZP1,MTSS1,NIP7,NOCT,NR2C1,PARP11,PARP9,PHLDB2,PKIG,PLAU,PNPLA3,PTPRG,SLC2A1,TBPL1,TCEB3,TFDP1,THOC2,TMEM201,TPP1,XPO7
Irgm1		other	Activated	2.138	bias	3.21e-05	CCNA2,FAS,IFI16,IFIT2,IFIT3,IFNG,NCAPG,NEK2	104 (7)
miR-3620-3p (and other miRNAs w/seed CACCCUG)		mature microrna	Activated	2.03	bias	3.21e-05	A1CF,AMER3,AMOT,BHLHE40,BMPR1B,CCDC3,COMMD9,DDIT4,DKC1,DMBT1,E2F3,EIF2S1,ENSA,FADS6,GGA2,GINS4,HTR1D,IFIT2,IGSF1,KCTD11,LEP,LFNG,LPGAT1,LRRC20,MED15,MXRA5,NANP,NAT9,NR2F2,OAZ2,PDE4DIP,PRELID2,PTPRK,QSOX1,SAR1B,SLC25A20,SLC26A3,SLC38A9,TSPAN9,WDR26,WIPF2,WWP2,ZFYVE1
miR-3925-3p (miRNAs w/seed CUCCAGU)		mature microrna	Activated	2.298	bias	3.25e-05	AAK1,AKAP12,AMOT,ASB13,ATP2B2,B3GALNT1,CACYBP,CADM2,CAST,CELF2,COA7,CP,EDEM1,ENSA,EYA3,FXYD6,GCLM,HRH1,IRF6,LGMN,LRRFIP1,LUZP1,MECR,NGB,PAPOLA,PIK3C2B,PLOD1,RBM25,RCAN1,RNF40,SF3B1,SLC25A20,SLC2A1,SPRED1,SRGAP1,TCEA3,TCEB3,TCF21,TNFSF13,TSPAN17,ZNHIT6
RBL1	-1.99	transcription regulator		1.448	bias	3.32e-05	CCNA2,CRADD,FAS,FOS,IVL,MYC,NEK2,RBL1,SKP2,TYMS	212 (18)
STAT4		transcription regulator		1.436	bias	3.32e-05	ENO2,ERO1A,HCFC2,HILPDA,IFIT2,IFNG,IL10,LRP1,LRRFIP1,MYC,PPP1R13L,RAMP2,RASSF1,RNF128,RRAGD,SF3B1,SLC2A3,VEGFA,VLDLR	237 (22)
miR-802 (miRNAs w/seed AGUAACA)		mature microrna		1.895	bias	3.33e-05	ADGRF2,AHCTF1,AMOT,ANKRD10,ANXA5,ATP1B3,BCLAF1,BTG2,CCT6A,CDC23,CP,CRNKL1,CXADR,EHF,FADS1,FAM171B,FLT1,GSE1,IVL,LPAR3,LTN1,MAMDC2,MCUR1,ODF2L,POLR3A,RHPN2,SAMD8,SLC2A3,SRSF11,STEAP4,TCEB3,TRAPPC13,WDR33
F7		peptidase		0.862	bias	3.34e-05	FOS,GADD45A,HBEGF,MYC,PAPOLA,VEGFA,ZFP36	199 (20)
NCOR2		transcription regulator				3.34e-05	ABCB11,CEBPA,FOS,IGF1,LEP,STAR,TRH	173 (23)
miR-4731-5p (miRNAs w/seed GCUGGGG)		mature microrna		1.621	bias	3.38e-05	AAK1,ABHD6,AIFM2,AK3,ALDOB,AMER3,ARSA,ASB13,CEBPA,CERCAM,COA7,CXADR,CYFIP2,CYTH2,DBNDD1,DCP1A,DEGS2,DGUOK,FBXO41,FCRL5,FXYD4,FYN,GAPDH,GCLM,GHRHR,GRHL2,GSS,HCFC2,HR,HRH1,KHK,LAMC2,LEP,LRP1,LRRC20,LRRFIP1,LRTOMT,LUZP1,MAFF,MAMDC2,MRI1,MSC,MXD4,MXRA5,NAA40,NAT9,NGB,PCSK1,PDE4DIP,PECAM1,PENK,PFKFB3,PIP4K2A,PLEKHA8,PODNL1,PPAN,PPP1R13L,PPP1R3B,PRELID2,PYGM,RRM2B,SAR1B,SCAMP5,SCARA5,SLC25A22,SLCO2B1,S…
thapsigargin		chemical toxicant		1.54		3.39e-05	DIO2,DNAJB9,FOS,GADD45A,IGF1,MEF2C,MYC,NFIL3,NR4A3,OXT,RCAN1,SESN2,SNAI1,TNFSF10	218 (20)
SHH		peptidase		-0.854		3.47e-05	AMD1,BMPR1B,DLX2,HELLS,IFNG,IGF1,IL10,LFNG,MYC,MYOD1,NR2F2,PGF,PTHLH,TFDP1,TRRAP,TYMS	223 (20)
miR-4783-5p (miRNAs w/seed GCGCGCC)		mature microrna		0.645	bias	3.54e-05	AP1M1,ASB13,DLX2,EMILIN1,FAF2,HOXD3,IL10,LPCAT1,MSC,MTCH2,NSD1,PECAM1,PPP1R3B,PPP1R7,SAR1B,SLCO2B1,SMIM11A,TCF21,TSPAN9
miR-495-3p (and other miRNAs w/seed AACAAAC)		mature microrna	Activated	2.168	bias	3.63e-05	AAK1,ABHD17C,ADAMTS3,ADGRA3,AMOT,ANTXR2,APITD1/APITD1-CORT,ATP2B2,ATRN,BCLAF1,BMPR1B,BTG2,CADM1,CALML4,CAST,CBL,CCNA2,CELF2,DDIT4,DICER1,DNAJC3,E2F3,EHF,FADS1,GAS1,GSE1,HBEGF,HLCS,IGF1,IGF1R,INTS6,KIAA1324,KIF1B,LEP,LPCAT3,LTN1,MAP4K4,MEF2C,MTF2,MYCBP,NFIB,NR2F2,NR4A3,PARP11,PBRM1,PEG3,PEX3,QSOX1,S1PR3,SLC2A1,SNRPF,SRGAP1,TOR1AIP2,TSHZ2,ZFX,ZMAT3
diethylstilbestrol		chemical drug	Activated	2.114		3.78e-05	AMBP,ARHGDIB,CYP19A1,DNMT1,FAS,FOS,GADD45A,GLRX,HBEGF,IGF1,IGF1R,INHA,KDR,MXD4,OXT,SLPI,STAR,VEGFA	153 (21)
miR-1188-3p (and other miRNAs w/seed GAGGCUC)		mature microrna		1.002	bias	3.88e-05	AAK1,ACSBG1,ADGRF2,ADPGK,AKAP12,ALKBH5,AQP11,CXADR,CYTH2,DCP1A,DPF2,EMB,FAM57A,GJA4,GPX6,HILPDA,HN1,HRH1,ITIH3,IVL,KHK,KIAA1644,LPCAT1,LRPPRC,LRTOMT,LUZP1,MAP10,NNT,NR4A3,PACSIN2,PARP11,PEX12,PFKFB3,PLEKHA8,POLR3A,PRSS12,PTHLH,PYGM,QSOX1,RMI2,SDCBP2,SLC19A2,SLC27A1,SLC35F2,STIM1,TMEM19,TMEM86A,TOR1AIP2,VEGFA,WWP2,ZER1
FOXM1		transcription regulator	Inhibited	-2.759	bias	3.89e-05	CCNA2,CXCL12,FLT1,FOS,IGF1,KDR,MYC,NEK2,PECAM1,SKP2,SNAI1,VEGFA	150 (9)
miR-455-5p (and other miRNAs w/seed AUGUGCC)		mature microrna	Activated	2.925	bias	3.91e-05	AKAP12,ANKRD44,ANTXR2,CAST,CDS2,CEP44,CEP70,DKC1,FADS1,FBXL20,FPGT,GPX6,HCFC2,HOXA1,IGF1R,INTS6,ITGB8,KDR,KIF1B,KIF3A,MAN1A1,MCUR1,MTF2,NCK2,NNT,ODF2L,PCP4L1,PHF12,PTP4A2,SLC2A3,SOCS4,TCEB3,TMEM86A,TXNDC15,UBE2F,VSTM4,ZCCHC10,ZNF674
decitabine		chemical drug		0.286		4e-05	BNIP3,CA9,CXCL12,CYP19A1,DMBT1,DNMT1,HELLS,IFI16,IFI35,IFIT2,MGMT,MYC,PTPRG,RASSF1,RPS25,RRM2B,SLC2A3,STAR,TOP2A	239 (22)
15-deoxy-delta-12,14 -PGJ 2		chemical - endogenous non-mammalian		0.413		4.02e-05	CYP19A1,EHF,FLT1,FOS,GADD45A,GCLM,HTRA3,IFNG,IL10,KDR,MYOD1,PLAU,SOCS1,VEGFA	206 (19)
EIF4E		translation regulator		0	bias	4.02e-05	BCLAF1,BNIP3,CAPG,CEBPA,CRADD,DGUOK,EIF4EBP1,MYC,NCK2,PGF,PNKP,SKP2,SPHK1,TRIP6	81 (7)
Map3k7		kinase		-1.093	bias	4.08e-05	BHLHE40,GAS1,HBEGF,ID4,IFIT2,IFNG,IL10,SESN1,SPHK1	217 (19)
NCOA2		transcription regulator		-1.964		4.08e-05	ABCB11,CEBPA,CYP1A1,FASN,IFIT2,IFNG,LHB,OXT,STAR	260 (22)
sirolimus		chemical drug		-0.877		4.1e-05	ADM,CDA,CEBPA,DDIT4,FAS,FASN,FOS,GGA2,IFNG,IGF1R,IL10,KDR,LEP,MAF,MYC,NR4A3,SLC2A1,SLC2A3,SLC3A2,TYMS,VEGFA,ZFP36	251 (19)
miR-4260 (and other miRNAs w/seed UUGGGGC)		mature microrna	Activated	2.575	bias	4.12e-05	A1CF,ABHD6,ABI3,ADGRA3,CLN6,CNP,COG8,DBNDD1,DDX42,DESI2,DNAJC21,EIF2S1,EXOSC2,FAF2,FAM134A,FBXO41,FGF18,FLRT2,GAS7,GPAM,HRH1,IGF1,LGMN,LPCAT1,LRP1,MECR,MS4A2,NOL6,NOLC1,PCSK2,PHYHD1,SAR1B,SDCBP2,SLC11A2,SLC1A1,SLC25A22,SRSF6,STARD10,STIM1,TCF19,TFDP1,TP53RK,WDR33,ZBTB7A,ZNF32,ZNF322
miR-216a-5p (miRNAs w/seed AAUCUCA)		mature microrna	Activated	2.983	bias	4.16e-05	ANK3,ATP1B3,BBIP1,BUB3,CADM2,CBL,CCT6A,CD93,CDC23,CELF2,CEP70,DIO2,DLX2,DPT,EML4,FAM134A,GPSM2,LAMC2,LRTOMT,LTN1,MAF,METTL17,MID1,MSL3,NAA50,PLSCR1,PTHLH,RMI2,SAR1B,SLC11A2,SSB,TIA1,TTC9,YLPM1
miR-3160-5p (miRNAs w/seed GCUUUCU)		mature microrna		0.641	bias	4.18e-05	AK3,AKAP12,ALDOB,ARID2,BMPR1B,CDS2,CLK3,CXADR,FAM107B,GGA2,GPX6,HBEGF,KIF1B,LGR4,LPAR3,MAT2A,MEF2A,METTL21A,MID1,MSL3,NELFA,NNT,NR4A3,OSBPL10,PCSK2,PEX12,PFKFB3,PTPRK,RRM2B,S100B,SAMD8,SMC4,STAMBP,TCF19,TIA1,TSTD2,VGLL3,ZNF395
miR-342-5p (and other miRNAs w/seed GGGGUGC)		mature microrna		-0.938	bias	4.2e-05	AAK1,AIFM2,AMD1,BHLHE40,BTG2,CCL21,CDA,CDC42EP5,CDH5,CLDN2,DEGS2,EIF2S1,EIF4EBP1,FAF2,FAM155B,FAS,FASN,FBXL20,GPAM,GPATCH4,GRHL2,HLCS,IRF6,ITGA2,KCTD11,LRP1,LYRM4,MAFF,MED15,NAGPA,NDUFAF6,NFIA,OAF,OSBPL10,PALLD,PARP11,PCP4L1,PPP1R13L,PPP6R2,PRELID2,R3HDM4,RALGDS,RASSF1,RET,RNF40,S1PR5,SESN2,SLC25A22,SLC27A1,SLC2A1,SLC2A3,SORBS2,STAR,TCF21,TMCC3,TSHZ2,TSPAN9,TTC9,WIPF2,WWP2,ZBTB7A,ZNF395
KRAS		enzyme	Activated	2.16		4.2e-05	ANPEP,BNC1,BNIP3,CCP110,CDH3,CXADR,DNMT1,ERO1A,FAS,FOS,GAS1,GCLM,GLUL,HBEGF,IFITM3,MYC,PALLD,PCOLCE,PEG3,SLC3A2,SNAI1,TOP2A,VEGFA	216 (19)
IHH		enzyme		0	bias	4.24e-05	FLT1,KDR,MEF2C,PECAM1,PTHLH,VEGFA
miR-486-3p (and other miRNAs w/seed GGGGCAG)		mature microrna		1.828	bias	4.24e-05	A1CF,ABHD6,ABI3,ADAM19,ALKBH5,AMOT,ARL4C,BHLHE40,CAPG,CCDC3,CDA,CNP,COL6A3,CXCL12,CXCL14,CYFIP2,DBNDD1,DCP1A,DDX42,DEGS2,DPF2,DTX3L,EIF2S1,EIF4G1,ENSA,EXOSC2,FAM134A,FAM155B,FAM65B,FASN,FBXL20,FBXO41,FBXW4,FCRL5,FGF18,FXYD6,FYN,GAS7,GSS,HEATR1,HR,HTRA3,IRF2BP1,IRF6,KHK,KLRC4-KLRK1/KLRK1,LPGAT1,LRP1,LRRC20,LUZP1,MAF,METAP1,MGMT,MS4A2,MSC,MTCH2,MXD4,MYO19,NGB,NOL6,NR2C1,NSD1,NSFL1C,PARP9,PATL1,PCP4…
miR-4708-3p (miRNAs w/seed GCAAGGC)		mature microrna		0.919	bias	4.29e-05	BBIP1,BTG2,CALML4,CCDC3,CDK5R1,DEGS2,DNAJC3,FAM107B,FAM122A,FAM155B,FAM65B,FBXW4,FCRL5,GLUL,GPAT3,HNMT,IDE,INTS6,LAMC2,LRRC20,METAP1,MID1,MXRA5,MYO19,NAA40,NCOA7,NFIA,NR4A3,OSBPL10,PHYHD1,POLR3A,PQLC1,RMI2,RRAGD,RXRA,SERPINB11,SLC25A22,SRGAP1,STAMBP,TCF21,TMCC3,TMX4,UBE2F,ZFYVE1
miR-193a-3p (and other miRNAs w/seed ACUGGCC)		mature microrna	Activated	2.278	bias	4.31e-05	AAK1,AK3,ALKBH5,AMBP,ANK3,AREL1,ARL4C,ATRN,CADM1,CAMK2N2,CDH5,COMMD9,CSTF1,DIO2,DNAJB9,EIF2S1,ENPP1,FAM134A,FLT1,GAS1,GSE1,HOXD8,IDE,LAMC2,LGR4,LPCAT1,LUZP1,MCCC1,MECR,MTHFD1,NAA50,NSD1,NSFL1C,PCSK2,PEX12,PGM3,PHLDA2,PLAU,PRSS12,SLC1A1,SLC35D2,SRSF6,SS18,TMEM39A,TPP1,TTC9,VASH1,WDR81,ZMAT3,ZNF322,ZNF395
miR-1275 (and other miRNAs w/seed UGGGGGA)		mature microrna	Activated	2.646	bias	4.49e-05	A1CF,AAK1,ABHD6,ACSL5,ADAR,AK3,AMD1,ARSA,ATAD2B,BCLAF1,CADM2,CCDC3,CD3E,CLDN2,CXADR,CXCL12,CYTH2,DCP1A,DDIT4,DENND4B,DESI2,DMBT1,DTX3L,EMILIN1,EYA3,FAM155B,FAS,GAS7,GLDN,GLYR1,GRHL2,GSS,HLCS,HR,HRH1,IFIT2,IGF1,IGF1R,LETM1,LPCAT3,LRRC20,LRRC8C,LUZP1,MAFF,MAP3K9,MECR,MYOD1,NAA40,NCOA7,NFIA,NOTCH4,NSD1,OXT,PACSIN2,PARP9,PIK3R2,PIPOX,PNMA1,POLR1D,PPP1R13L,PPP6R2,PTHLH,PTPRR,PXK,R3HDM4,RNLS,RUNDC3A,SD…
miR-624-3p (miRNAs w/seed ACAAGGU)		mature microrna		1.417	bias	4.64e-05	AAK1,AKAP9,CADM2,CCT6A,CEP44,CRNKL1,CXADR,CXCL12,CYP19A1,EEF1E1,ENC1,FLRT2,FYN,GCLM,HNMT,HOXD8,LRTOMT,LYRM4,METAP1,METTL21A,MTAP,NFIB,OSBPL10,PIK3C2B,PRSS12,PSD3,RASA1,S100PBP,SAR1B,SS18,TMEM39A,WWP1,XPO7,ZNF395
miR-1228-3p (miRNAs w/seed CACACCU)		mature microrna		1.807	bias	4.75e-05	AAK1,ANK3,ARSA,ATP1B3,BCLAF1,CADM1,CRY2,FAM134A,HILPDA,HSPA4,IFIT2,L3MBTL3,LAMC2,LYRM4,MAB21L3,MCUR1,MOAP1,MSL3,NFIA,PCSK2,PQLC2,PTP4A2,QPCTL,RHPN2,SAR1B,SESN2,SLC11A2,SOCS6,SPTLC2,SS18,STEAP4,TMX4,WWP2,ZFYVE1,ZMAT3
miR-582-3p (miRNAs w/seed AACUGGU)		mature microrna	Activated	2.43	bias	4.83e-05	AAK1,ABCB11,ABHD5,ARL4A,B3GALNT1,CACYBP,CP,DLAT,DNAJC21,EIF2S1,GAS1,IGSF1,KIF3A,LPGAT1,MAMDC2,MAN1A1,MAP4K4,MEF2A,MYCBP,NFIL3,NR2C1,NR2F2,NUP54,ODF2L,PBRM1,PLLP,PNMA1,RCAN1,SESN2,SLC1A1,SLC25A20,TOR1AIP2,TP53RK
miR-4308 (and other miRNAs w/seed CCCUGGA)		mature microrna		1.407	bias	4.88e-05	ACSL1,ADAM19,ADAMTS3,ASB13,ATRN,BUB3,CDS2,CELF2,CLDN2,CLEC14A,DIO2,DTX4,EHF,EIF2S1,FADS6,FAM155B,FBXO41,FXYD4,GAS7,GYS1,HTRA3,IFIT2,IGF1R,ITIH3,KIAA1644,LRRC20,LRRFIP1,LRTOMT,MED15,MID1,NSD1,PCP4L1,PECAM1,PLOD1,PPP1R13L,RGS12,S100PBP,S1PR3,SLC25A20,SLC37A4,SLC6A3,STIM1,TCF19,TJP2,TMEM201,TMX4,TSPAN9,TTC9,TXNDC15,UBTF,VASH1,VSTM4,WDR81,WIPF2,XPO7,ZBTB7A,ZFX,ZFYVE1,ZNF395,ZNF692
EGFR		kinase		1.954		4.89e-05	AMD1,COL6A1,CXCL12,CYP19A1,DUSP1,FASN,FOS,GADD45A,HBEGF,IFNG,IGF1,MACF1,MYC,NFIB,PLAU,PRKCZ,SLC2A1,SLC2A3,SLPI,TPST1,VEGFA	275 (20)
miR-3941 (and other miRNAs w/seed UACACAC)		mature microrna		0.927	bias	4.89e-05	AHCTF1,ANK3,ANKRD44,BMPR1B,CACYBP,CCP110,CD93,CELF2,DLAT,DNAJC21,ERO1A,FBXO9,GAS7,GPX6,HILPDA,ITGB8,IVL,MEF2A,MID1,MTAP,MTF2,NFIL3,PCSK2,PDE4DIP,RBFA,RET,S100B,SESN1,SOCS6,SORBS2,STARD8,STBD1,TMCC3,TTC9,TXNDC15,USP37,VEGFA,ZER1,ZFP1,ZMAT3,ZNF674
miR-4659a-5p (and other miRNAs w/seed UGCCAUG)		mature microrna	Activated	2.098	bias	4.93e-05	AAK1,ABHD5,ANTXR2,CDC27,COMMD9,CP,EML4,FADS1,FBXO9,HSPA4,LAMC2,LRRFIP1,MID1,MSL3,NAA40,NR4A3,PCSK1,PHLDB2,PRSS12,RRAGC,SLC26A3,SLC27A1,SLC38A9,SMPD4,SNAPC5,SPRED1,SS18,TBC1D32,TMEM165,TMEM19,TMX4,TSTD2,VGLL3,WDR26,WDR33,WIPI1,ZMAT3,ZNF674
SP3		transcription regulator		0.022		4.96e-05	ACSL1,AKAP12,CDK5R1,CEBPA,FAS,FOS,HDAC4,IGF1,IL10,ITGB8,KDR,KLF1,PLAU,SLC2A3,VEGFA	71 (5)
miR-138-5p (miRNAs w/seed GCUGGUG)		mature microrna	Activated	2.556	bias	5e-05	AMER3,ANKRD44,AREL1,ARL4C,CALML4,CAST,CCDC3,CCL21,CD93,CSRP2,CYFIP2,DCP1A,DESI2,DTX4,E2F3,EIF4EBP1,ENSA,FAM171B,FBXL20,FBXO41,GAS7,HDAC4,KDR,KLF11,KLRC4-KLRK1/KLRK1,KRT19,L3MBTL3,LRRFIP1,MACF1,MAP3K9,MRPS23,MS4A2,MTF2,MXD4,NFIA,NFIB,NR4A3,NSFL1C,OAF,PACSIN2,PARP9,PCSK2,PHACTR1,PLAU,PLLP,PTP4A2,RET,ROCK2,SLC2A1,SOCS6,SORBS2,SPRED1,SRSF6,TMEM144,TMTC4,TNFSF10,TSTD2,TTLL12,VSTM4,ZER1
miR-550a-5p (and other miRNAs w/seed GUGCCUG)		mature microrna		0.999	bias	5.11e-05	AHCTF1,AKAP12,ANTXR2,ARSA,CCDC3,CDH5,CLDN2,CXADR,DENND4B,FAM134A,FASN,GPR39,HR,IGF1R,ITGA2,LPCAT1,LRRC20,LRTOMT,MAB21L3,MAN1A1,MAP4K4,MEF2A,MTCH2,NAT9,NNT,NOL6,NOTCH4,OSBPL8,PACSIN2,PAPOLA,PCSK2,PLOD1,PODNL1,PRELID2,PRSS12,RNLS,SAR1B,SLC11A2,SLC16A3,SLC2A1,SOCS4,SRSF6,STBD1,TJP2,TMEM201,TMX4,TNFSF10,TTC9,WDR26,ZCCHC10
miR-339-3p (miRNAs w/seed GAGCGCC)		mature microrna	Activated	2.596	bias	5.32e-05	CAMK2N2,CLN6,CRNKL1,CYTH2,DLX2,GLYR1,HR,IGF1R,LFNG,METTL21A,MSL3,MYOD1,NCK2,NR2C1,PHLDA2,PSD3,RCAN3,RGS12,RUNDC3A,S1PR3,SLC25A22,TMEM201,TRRAP,URM1,ZER1
miR-4292 (and other miRNAs w/seed CCCUGGG)		mature microrna	Activated	2.402	bias	5.42e-05	ADAM19,ADAR,AIFM2,AMOT,AP1M1,ATRN,B3GALNT1,BNC1,BUB3,CAMK2N2,CBL,CCL21,CCNA2,CD247,CDK5R1,CEBPA,CEP70,CLDN2,CLEC14A,CLN6,CYFIP2,ENTPD5,FADS1,FADS6,FAM155B,FAM65B,FBXL20,FBXO41,FLT1,FXYD6,GAS7,HDAC4,HNMT,KCTD11,KIAA1324,KIAA1644,KLF11,KLRC4-KLRK1/KLRK1,LAMC2,LEP,LETM1,LFNG,LRP1,LRRFIP1,LYRM4,MAT2A,MED15,MID1,NFYC,NOL6,NSD1,PFKFB3,PHF12,PLOD1,POLR1D,PPP1R3B,PQLC2,RXRA,S100B,SCAMP5,SLC25A20,SLC25A22…
miR-4674 (miRNAs w/seed UGGGCUC)		mature microrna		1.976	bias	5.43e-05	AAK1,ADGRF2,CEP44,CXCL12,CYP19A1,DBNDD1,DENND4B,DESI2,DIO2,DNAJC21,DTX4,ENSA,FAM65B,FLT1,GINS4,IFIT2,IL10,KCNE3,KDR,LRTOMT,MAP3K9,MCUR1,MECR,MEF2A,MRI1,NAA40,NR2C1,PCSK1,PDE4DIP,PEX3,PODNL1,PQLC1,PTHLH,RASSF1,S1PR3,SCAMP5,SCARA5,SNRPF,SPRED1,STAMBP,TCF19,TOP2A,TOR1A,TOR1AIP2,TPST1,TRUB2,UBE2F,UBTF,ZNF382
cigarette smoke		chemical toxicant		0.72	bias	5.52e-05	ADM,CYP1A1,DDIT4,DICER1,DNMT1,FOS,GCLM,IFNG,IGF1,IL10,KDR,LEP,MAFF,PGF,PRKCZ,RAMP2,SLC2A1,VEGFA	276 (23)
Pka		complex		0.371		5.56e-05	CYP19A1,DUSP1,FOS,IFNG,IGF1,LEP,NR4A3,PENK,POU1F1,PRKCZ,PTHLH,RGS2,STAR	214 (21)
TICAM1		other		-1.137	bias	5.58e-05	ACSL1,AK3,CXCL13,DUSP1,FAS,IFI16,IFIT2,IFIT3,IFNG,IL10,MAFF,SOCS1,TNFSF10,TOR1AIP2	202 (18)
HTT		transcription regulator		0.447		5.58e-05	ACAT2,AKAP12,AMD1,ATP2B2,BHLHE40,CALML4,CAST,CLK3,COL6A1,COL6A3,CYFIP2,DIO2,DNAJC3,ENO2,FASN,FOS,FXYD6,GAPDH,GAS7,GLUL,GSS,HBEGF,IFI16,MAN1A1,MYOD1,NDUFA5,NFIB,NFIL3,OSBPL8,OXT,PENK,PPRC1,RRS1,SCAMP5,SESN1,SLC25A22,SLC2A1,TAC1,TNFSF13,TRH	262 (24)
TCR		complex		0.139		5.61e-05	ADM,CBL,CXCL13,DKC1,EBNA1BP2,FAS,FOS,FYN,IFIT2,IFIT3,IFNG,IL10,MAF,MYC,NIP7,RNF128,RRS1,SLC2A1,SLC2A3,SOCS1,SPHK1,TOB1	167 (20)
streptozocin		chemical drug		0.607		5.88e-05	ABCB11,ALB,CEBPA,FAS,FASN,FOS,IFNG,IGF1,IGF1R,IL10,LEP,OXT,PCSK2,S100B,SLC25A20,SLC2A3,SLC6A3,VEGFA	183 (22)
CD28		transmembrane receptor		-1.035		5.93e-05	ARHGDIB,BHLHE40,CBL,CD247,CD3E,CXCL13,EWSR1,FOS,FYN,GAPDH,GYS1,HELLS,IFNG,IGF1R,IL10,LTN1,MAF,MYC,RNF128,SOCS1,SSB,STIM1,TNFSF10,TOB1	182 (21)
miR-1286 (miRNAs w/seed GCAGGAC)		mature microrna		0.123	bias	5.96e-05	AKAP9,ARL4C,ASB13,ATRN,BMPR1B,CA9,CACYBP,CDH3,CDK5R1,CDS2,CIDEA,CNP,CYTH2,DBNDD1,DICER1,DPT,EXOSC2,GAS7,GPATCH2,GYS1,IFIT2,IRF6,KATNAL1,KLF11,LRPPRC,MGMT,NAA50,NAT9,NGB,PARP9,PFKFB3,PHLDA2,PPP1R3B,PTP4A2,QSOX1,S100PBP,SCARA5,SLC6A3,SLPI,SMOX,SRSF6,TAC4,TCEB3,TIPIN,TMEM201,TPCN2
PML		transcription regulator		1.551		6.07e-05	CACYBP,DNAJB9,FASN,GADD45A,GCLM,GPAM,HBB,LEP,MAF,MAFF,NSFL1C,RXRA,SLC25A20	210 (17)
troglitazone		chemical drug		0.937		6.12e-05	ACSL1,CEBPA,CYP19A1,ENO2,ENTPD5,ERO1A,FASN,FOS,GPAM,IFI16,IFNG,ITGA6,LEP,MGMT,MYC,NR2F2,NR4A3,SLC27A1,SLC2A1,VEGFA	237 (21)
MTOR		kinase		0.758		6.14e-05	ARL4C,BNIP3,CEBPA,CNP,IFNG,IGF1,IL10,INHA,LEP,MYC,PFKP,PRKCZ,SKP2,SLC16A3,SLC2A1,VEGFA	227 (22)
IL2		cytokine		-0.28		6.18e-05	BHLHE40,CD2,CD247,CEBPA,CYP1A1,FAS,FOS,FYN,GAPDH,IFNG,IL10,ITGA2,ITGA6,KLRC4-KLRK1/KLRK1,LTB,MAF,MYC,NMI,PECAM1,RGS2,RNF128,RXRA,SHE,SLC2A3,SOCS1,TNFRSF17,TNFSF10,TP53RK	241 (20)
NFKBIA		transcription regulator		0.033		6.48e-05	BNIP3,BRF2,CCNA2,CDH3,CP,CXCL12,ERO1A,FAS,FOS,GADD45A,HOXD3,IFI16,IFNG,IL10,ITGA2,MGMT,MSC,MXD4,MYC,MYOD1,NOCT,PLAU,PTP4A2,RCAN1,TAC1,TFDP1,VEGFA	231 (19)
miR-4425 (miRNAs w/seed GUUGGGA)		mature microrna	Activated	2.591	bias	6.57e-05	ABI3,ADGRF2,CACYBP,CDS2,CNP,CXCL14,DPT,DRAM2,DTX4,EMB,FADS1,FAM188A,GLDN,GYS1,LMCD1,MYOD1,NAA50,NANP,NOL6,NSD1,PCSK2,PEG3,PIP4K2A,PKIG,PODNL1,QPCTL,RBM25,RRM2B,SCARA5,SMIM11A,STAR,TBC1D32,TNFSF10,TP53RK,TPP1,WDR33,WNK4,ZFX,ZNHIT6
miR-361-3p (miRNAs w/seed CCCCCAG)		mature microrna		0.541	bias	6.62e-05	ADM,AMD1,ARL4C,ARSA,ATP2B2,BMPR1B,BTG2,CDS2,CEBPA,CIDEA,CLDN2,CLEC14A,CLN6,CNP,CP,CRY2,CSRP2,CYGB,CYP19A1,DBNDD1,DENND4B,DTX4,EHF,ENO2,ENSA,EXOSC2,FADS6,FBXO41,GADD45A,GAS7,GSE1,HBB,HDAC4,HEATR1,IGF1R,ITGA2,ITIH3,KHK,KIAA1644,KIF3A,KLF1,KLRC4-KLRK1/KLRK1,L3MBTL3,LFNG,LPGAT1,LRRC20,MAF,MAFF,MAT2A,MCCC1,METTL21A,NOL6,OAZ2,PBRM1,PEX12,PHACTR1,PIK3C2B,PLEKHA8,R3HDM4,RASSF1,RBFA,RGS12,RRM2B,S100PBP,SA…
miR-4684-3p (miRNAs w/seed GUUGCAA)		mature microrna		1.532	bias	6.71e-05	ALDOB,ANKRD44,BNIP3,EDEM1,EMB,FCER1A,FLRT2,INTS6,L3MBTL3,LAMC2,MCUR1,MEF2C,MID1,MTAP,NFIA,NRCAM,NUP54,PHYHD1,PSD3,PTHLH,RET,ROCK2,SLCO2B1,SOCS6,SPTLC2,TJP2,TOP2A,URM1
miR-4312 (miRNAs w/seed GCCUUGU)		mature microrna	Activated	3.515	bias	6.74e-05	ABHD5,ARL4A,CADM2,CAST,CP,CXADR,CXCL12,DIO2,EXOSC2,FBXO41,IFNG,INIP,IRF6,ITGB8,KIAA1644,MAB21L3,MAMDC2,MOAP1,NANP,NR1I2,NR4A3,PBRM1,POLR3A,RET,RUNDC3A,SLC16A3,SPRED1,SRSF6,TXNDC15,VASH1,ZNF322
miR-3649 (miRNAs w/seed GGGACCU)		mature microrna		0.361	bias	6.85e-05	ADAM19,ARSA,ASB13,ATAD2B,B3GALNT1,BTG2,CNP,CYTH2,DHRS1,EHF,ENTPD5,FAM155B,FAM65B,FBXO41,GHRHR,HCFC2,IRF6,KCTD11,KIF1B,KLF1,LGI4,MAFF,MED15,NSD1,PGM3,PRSS12,QPCTL,S100PBP,SHE,SLC2A3,SLC35D2,SLC35F2,SLC37A4,STARD8,STEAP4,TCEB3,TCF21,TMCC3,TMEM144,TMEM201,TMEM86A,TOR1AIP2,UBTF,VGLL3,WIPF2,ZER1
CEBPD		transcription regulator		-0.829		6.9e-05	ALB,CDC27,CYP19A1,CYP1A1,FOS,IGF1,IVL,LEP,MYC,VLDLR	193 (18)
miR-203a-3p (and other miRNAs w/seed UGAAAUG)		mature microrna		1.229	bias	7.01e-05	AAK1,ACSL1,ADPGK,AMOT,ANKRD44,ANTXR2,ARID2,CALML4,CBL,DCP1A,DICER1,DIO2,DNAJC21,E2F3,EEF1E1,EGLN1,EHF,FBXL20,FGG,FLRT2,GINS4,GYS1,HBEGF,ID4,IFIT3,INTS6,ITGA2,MEF2C,MSL1,NAA50,NEK2,NFIB,NFIL3,OSBPL8,PARP11,PBRM1,PCSK1,PCSK2,PEX3,PHF12,PNMA1,RBM25,RRAGD,SCARA5,SLC11A2,SLC2A3,SOCS6,TMEM248,TOR1AIP2,TSHZ2,VEGFA,ZFP1,ZNHIT6
miR-4695-3p (miRNAs w/seed GAUCUCA)		mature microrna	Activated	2.855	bias	7.14e-05	ACSBG1,CEP70,COA7,EEF1E1,FADS1,FAM107B,GINS4,INIP,INTS7,MAB21L3,MRI1,NAA40,NAA50,NAGPA,NCOA7,PARP11,PLEKHA8,PRELID2,RBM25,SLC25A20,SPRED1,STAMBP,TEX2,TNFSF10,TP53RK,TSHZ2,TSTD2,UBE2F,WDR26
miR-1262 (and other miRNAs w/seed UGGGUGA)		mature microrna		0.679	bias	7.26e-05	ADPGK,ALOX15,AQP11,ARHGDIB,ARSA,ATP2B2,CCT6A,CDH5,COMMD9,CRNKL1,DNAJC15,EIF2S1,FAM134A,FLT1,GJA4,HDAC4,KLF11,LRRFIP1,MAT2A,METAP1,NOL6,NOTCH4,NR2C1,PATL1,PCSK1,PEG3,PHLDB2,PIK3C2B,PLBD2,PTHLH,SESN2,SMPD4,STAMBP,TCF19,TTLL12,WAS,WDR93,XPO7,ZBTB7A,ZNF674,ZNHIT6
miR-4645-5p (and other miRNAs w/seed CCAGGCA)		mature microrna		1.958	bias	7.31e-05	AAK1,AIFM2,AK3,ANKRD10,ANXA5,BTG2,CCP110,CDH5,CELF2,CEP44,CRY2,CYGB,CYYR1,DTX4,EHF,EIF4G1,FAM134A,FBXW4,FLT1,FPGT,GAS7,GYS1,HILPDA,HN1,IFNG,IGSF1,IRF6,KIAA1324,KIF3A,KLF11,LAMC2,LGR4,LRPPRC,LRRC20,MAP3K9,MRI1,MXD4,NCAPG,NOL6,NSD1,OAZ2,PCSK1,PGF,PIP4K2A,POLR3A,RGS12,RXRA,S1PR5,SAMD8,SHE,SLC19A2,SLC35F2,SLCO2B1,SOCS1,SPRED1,TCEB3,TCF21,THOC2,TMEM248,TOR1A,TOR1AIP2,TRIM3,TSTD2,VASH1,VSTM4,WDR46,ZFYV…
miR-370-3p (and other miRNAs w/seed CCUGCUG)		mature microrna	Activated	2.322	bias	7.4e-05	AAK1,ABCB11,ADAM19,AMOT,ANK3,ANTXR2,ATRN,CCL21,CDC23,CEP44,CERCAM,CYTH2,DICER1,EMB,EML4,EYA3,FLRT2,FLT1,GLYR1,GSS,HDAC4,KATNAL1,KDR,KIF1B,KLF1,LPCAT1,LRRC20,LUZP1,MAB21L3,MAP3K9,MGMT,MTSS1,MYCBP,MYF6,NAA40,NFIA,NOL6,NR4A3,PEG3,PLEKHA8,PNPLA3,RASSF1,SHE,SLC2A1,SLC35F2,SLPI,SNAI1,SRSF11,SRSF6,STARD8,TBC1D32,TMEM201,TMEM86A,TOR1AIP2,TXNDC15,UBTF,USP37,VSTM4,WDR81,ZDHHC14
miR-1295b-5p (and other miRNAs w/seed ACCCAGA)		mature microrna		1.78	bias	7.41e-05	AIFM2,ATAD2B,CAST,CNP,COA7,COMMD9,CYFIP2,CYGB,DDIT4,DIO2,DPT,DUSP1,EXOSC2,FADS6,FAM122A,FAM57A,FAS,HBEGF,IDE,IGF1R,ITGA6,KRT19,LRTOMT,MEF2C,MRPS23,MTSS1,NR1I2,NR4A3,NSFL1C,NT5DC1,PCSK1,PEG3,PEX3,PLEKHA8,PTPRG,SLC11A2,SLC1A1,SMC4,TNFSF10,TXNDC15,VSTM4,ZNF280D,ZNF674
STAT6		transcription regulator		1.804		7.47e-05	ACSL1,ADAM19,CCL24,CD2,CLDN2,FASN,FCGR1A,FLRT2,HRH1,IFI16,IFIT3,IFNG,IGF1,IL10,LTB,MAF,NFIL3,PLSCR1,SOCS1,SPHK1,ZFP36	201 (19)
E2F4		transcription regulator				7.49e-05	BUB3,CCNA2,CRADD,CSTF1,DROSHA,E2F3,FAS,FPGT,MTHFD1,MYC,NASP,NEK2,PLSCR1,RBL1,SLC3A2,SMC4,TOP2A,UBE2T
miR-4530 (miRNAs w/seed CCAGCAG)		mature microrna	Activated	2.389	bias	7.57e-05	AAK1,ADAM19,ADAR,ALDOB,BMPR1B,BRF2,CBL,CD3E,COA7,COL6A3,CRNKL1,DBNDD1,DTX4,ENC1,FAM134A,FCRL5,HNMT,IGF1,INTS6,IRF6,KIAA1324,LPCAT1,MAT2B,MEF2C,MS4A2,NASP,NSFL1C,OSBPL10,PACSIN2,PATL1,PCP4L1,PDE4DIP,PFKFB3,PGF,PPP1R3B,PPP6R2,PQLC2,PRELID2,PSD3,PTP4A2,RASA1,RGS12,SESN1,SLC11A2,SLC25A20,SLC25A22,SRSF6,TIPIN,TMEM86A,TOR1A,TRIP6,VASH1,WBP2,WWP2,YLPM1,ZMAT3
KLF2		transcription regulator		-0.761		7.64e-05	ADM,CD93,CEBPA,CNP,FLT1,GADD45A,HBB,HYAL2,KDR,MYC,PECAM1,PGF,PTHLH,SLC2A1	162 (12)
S100A9		other		1.291		7.72e-05	AKAP12,BHLHE40,CDH3,CP,CSTF1,CXCL14,DDIT4,FAS,IFNG,IGF1,MGMT,NR4A3,PLAU,PRSS12,SDCBP2	195 (18)
miR-4732-3p (miRNAs w/seed CCCUGAC)		mature microrna	Activated	2.207	bias	7.85e-05	ADAR,ANK3,CDH5,CDS2,CLN6,COMMD9,CRNKL1,CXCL13,CYP19A1,CYTH2,CYYR1,DDIT4,DRAM2,E2F3,ENPP1,GGA2,GPR39,INTS7,KIAA1644,KLRC4-KLRK1/KLRK1,L3MBTL3,LETM1,LRTOMT,MAT2A,MED15,MXD4,MYO19,NR2C1,OAZ2,PCP4L1,PRELID2,PTPRK,RASSF1,RNF128,S1PR5,SESN2,SHE,SRSF6,SS18,TCEB3,TOR1AIP2,TPCN2,UBTF
AKT1		kinase		-0.444		7.95e-05	ACAT2,CIDEA,FAS,FASN,FOS,GCLM,IFNG,IGF1R,IL10,KDR,LEP,MYC,PCOLCE,SLC2A1,SLC3A2,SNAI1,TNFSF10,VEGFA	221 (18)
LMNA		other				7.95e-05	AHCTF1,AIFM2,ANKRD37,CCP110,CD93,CLK3,HEATR5A,HTRA3,KIAA1551,LEP,MAFF,MSC,MXD4,MYOD1,RHPN2,WDR33,ZCCHC10,ZFP36
miR-767 (and other miRNAs w/seed GCACCAU)		mature microrna	Activated	2.988	bias	7.98e-05	ADAM19,ADAMTS3,ADGRF2,ANKRD10,APITD1/APITD1-CORT,ATAD2B,ATP2B2,CD93,CDC23,CDH5,COL6A3,CXADR,EIF2S1,ENC1,EXOSC2,FAF2,FAM134A,GPATCH2,HNMT,IGF1,LAMC2,LTN1,MCUR1,MID1,NASP,NFIA,NMI,PODNL1,POLR1D,PTPRK,SHE,TP53RK,TTC9,TXNDC15,WDR26,WDR33,ZFX,ZNF382
miR-343 (and other miRNAs w/seed CUCCCUU)		mature microrna		0.813	bias	8.02e-05	ACSL1,ALDOB,ATRN,CYTH2,DDX42,DNAJC21,DTX4,EDEM1,EIF2S1,ENC1,FAM107B,FAM155B,FCRL5,FLT1,GRHL2,HOXA1,HYAL1,IFIT2,IL10,IRF6,KCNE3,KIF1B,LEP,LRP1,LRRFIP1,METAP1,MSC,NAA40,OSBPL10,PARP9,PCP4L1,PIK3C2B,PLAU,PRELID2,PTHLH,RXRA,SLC1A1,SLC2A3,SLCO2B1,SRGAP1,TMEM39A,TRRAP,TXNDC15,XPO7,ZMAT3,ZNF280D,ZNF395
GHRL		growth factor		-1.006		8.08e-05	FASN,FOS,GPAM,LEP,MYF6,MYOD1,PCSK2,POU1F1,STAR	200 (24)
HDAC1		transcription regulator	Activated	2.238		8.11e-05	AKAP12,CCNA2,CEBPA,FAS,FLT1,FOS,IL10,KDR,MEF2C,MYC,NASP,PLAU,POLD2,RBL1,RRM2B,SNAI1,TYMS	200 (18)
miR-3177-5p (miRNAs w/seed GUGUACA)		mature microrna		1.003	bias	8.23e-05	AAK1,ABCB11,ADAMTS3,AHCTF1,ATP2B2,BTG2,CP,CXCL13,CYP1A1,ENOPH1,FLRT2,FPGT,INTS6,KLF11,LRRC8C,LUZP1,MEF2A,MOAP1,MRPS23,NR1I2,NSFL1C,NUP54,OSBPL10,PHF12,PPP1R3B,PTPRK,RBM25,RNF128,RNLS,SAR1B,SLC2A3,SS18,STEAP4,TRAPPC13,TTC9,WDR33,XPO7,ZNF280D
miR-4533 (miRNAs w/seed GGAAGGA)		mature microrna	Activated	2.095	bias	8.24e-05	ACSBG1,ALOX15,ANTXR2,ATRN,CCDC3,CNP,COMMD9,CRY2,CRYZL1,DBNDD1,EGLN1,EIF4EBP1,EMB,FLT1,GAS7,GLYR1,GNA11,HOXA1,HOXD3,IDE,LAMC2,LFNG,MAP10,MAP4K4,MID1,NAT9,NOLC1,NSFL1C,PAPOLA,PECAM1,PEX12,PHF12,PLLP,PLSCR1,PSD3,RET,RMI2,RUNDC3A,SLC11A2,SLC27A1,SPTLC2,SS18,STAMBP,STIM1,TBC1D8,TOR1A,TOR1AIP2,TTC9,VSTM4,WIPF2,ZNHIT6
WR 1065		chemical drug	Activated	2	bias	8.41e-05	FAS,GADD45A,KDR,VEGFA	196 (16)
4-nonylphenol		chemical toxicant				8.41e-05	FOS,IGF1,IL10,MYC	129 (18)
AGRP		other				8.41e-05	DIO2,FOS,LEP,TRH	40 (3)
miR-4797-3p (miRNAs w/seed CUCAGUA)		mature microrna	Activated	2.16	bias	8.54e-05	AAK1,ADAMTS3,ATP2B2,BHLHE40,CAST,CDC27,CDH3,EEF1E1,EML4,FAF2,FAM171B,GPAT3,IDE,IGSF1,MTSS1,NDUFAF6,NOLC1,NRCAM,PNMA1,PTPRG,RET,SAMD8,SOCS6,SRSF6,STEAP4,TAC1,TBC1D32,ZFP1
miR-148a-3p (and other miRNAs w/seed CAGUGCA)		mature microrna		1.788	bias	8.55e-05	ABI3,ACSL5,AK3,AQP11,BMPR1B,CADM1,CAST,CCT6A,CDK5R1,COL6A3,DCP1A,DICER1,DNMT1,DTX3L,E2F3,ENOPH1,EYA3,FLT1,GADD45A,GAS1,GGA2,HCFC2,HEATR1,HNMT,HSPA4L,IGF1,ITGB8,KIAA1644,LRPPRC,MAF,MAFF,MAP3K9,MEF2A,NMI,NR1I2,NSD1,PATL1,PNMA1,PQLC1,RBFA,SESN2,SHE,SIMC1,SLC2A1,SLC2A3,SRSF11,STEAP4,TAC4,TBC1D8,TMCC3,TMEM165,TPP1,TRIM3,TTLL12,USP37,WDR33,ZBTB7A,ZMAT3,ZNF322
RXRA	-1.79	ligand-dependent nuclear receptor		-1.238		8.56e-05	ABCB11,ACSL1,ARL4C,CCNA2,CEBPA,CIDEA,FASN,FOS,GHRHR,HOXA1,IFNG,IL10,PCSK2,POU1F1,SLC27A1,STAR,TPP1,TRH,VEGFA	199 (23)
miR-505-3p (miRNAs w/seed GUCAACA)		mature microrna		1.795	bias	8.81e-05	AHCTF1,AKIP1,AMD1,AMOT,ANKRD10,CADM1,CD3E,CEP44,CP,CRY2,CXCL14,EDEM1,EHF,FAM122A,FGF18,GLYR1,HOXA1,IFNG,IGF1R,INTS6,IRF6,KATNAL1,LRRFIP1,MID1,NCK2,PEX3,PGM3,PHLDB2,PTPRR,RHPN2,SAMD8,SRSF11,TIGD2,TXNDC15,VGLL3,WDR26,ZFX
miR-1193 (miRNAs w/seed GGAUGGU)		mature microrna		1.736	bias	8.99e-05	AK3,ARID2,ASB13,CADM2,CDK5R1,COMMD9,DNAJB9,FAF2,FAM162B,GCLM,GLUL,GPX6,GSE1,KCNE3,LAMC2,MID1,MS4A2,MYCBP,NCK2,NMI,NOL6,NPHS2,NSFL1C,PEG3,PLBD2,RBL1,SLC19A2,STEAP4,TOP2A,TSHZ2,TSTD2,ZFYVE1
retinoid		chemical drug		0.479		8.99e-05	DUSP1,HBEGF,IFNG,ITGA6,MYC,TNFSF10,VEGFA	201 (20)
miR-3150a-3p (and other miRNAs w/seed UGGGGAG)		mature microrna	Activated	2.47	bias	9e-05	A1CF,ADAM19,ADGRA3,ADGRF2,BMPR1B,BUB3,CAMK2N2,CD93,CDH5,CLDN2,COA7,COMMD9,CYFIP2,DBNDD1,DIO2,DTX4,EMB,ENO2,EYA3,FAM155B,FBXL20,FBXO41,FBXO9,FYN,GLDN,GSE1,HTRA3,IDE,IGF1R,LPCAT3,LUZP1,MAFF,MSC,NAA40,NFYC,NGB,NR2F2,OAF,ODF2L,PCP4L1,PECAM1,PNPLA3,POLR1D,POLR3A,PPP1R13L,PQLC2,RBM25,SCAMP5,SCARA5,SESN2,SLC2A1,SLCO2B1,STIM1,TCEB3,TMEM86A,TPP1,TRH,TRIM3,TTC9,UBTF,USP37,VASH1,VSTM4,WDR46,ZBTB7A,ZMAT3
miR-4717-5p (and other miRNAs w/seed AGGCCAC)		mature microrna		1.162	bias	9.15e-05	ARL4C,BCLAF1,BNIP3,CCDC3,CCT6A,CDC27,CDH5,CELF2,DLAT,DNMT1,EGLN1,EIF2S1,FAM134A,FAM171B,FAM188A,FBXW4,FYN,GLT8D1,KIAA1324,KIF1B,LETM1,MCAT,MXRA5,NAA40,NANP,NAT9,NDUFA5,NFIB,NOCT,NPC2,OAZ2,PALLD,PARP11,PLEKHA8,POLR1D,RASSF1,RBFA,RGS2,ROCK2,RXRA,S1PR5,SESN2,SHE,SPTLC2,STAMBP,TMCC3,TMEM19,TMEM201,TOR1AIP2,TSTD2,UBE2F,ZNHIT6
Mapk		group		-0.578	bias	9.26e-05	FOS,IFNG,IGF1,LEP,MYC,NR4A3,POU1F1,PRKCZ,SLC6A3,SNAI1,VEGFA	209 (21)
miR-224-5p (miRNAs w/seed AAGUCAC)		mature microrna		-0.229	bias	9.27e-05	ABHD5,ADAR,ANK3,ARL4C,BMPR1B,CACYBP,CAST,CBL,CDC27,CDS2,CRNKL1,CXCL14,DDX42,DESI2,EHF,ENC1,FBXL20,GGA2,INIP,KATNAL1,KLF11,MAFF,MAP4K4,NFIA,NFIB,NNT,NR2C1,NR4A3,NRCAM,PAPOLA,PFKFB3,POLR1D,PRSS12,RRS1,SLC37A4,SLCO2B1,SRGAP1,TOR1AIP2,USP37,YLPM1,ZMAT3,ZNF395
miR-494-3p (miRNAs w/seed GAAACAU)		mature microrna	Activated	2.642	bias	9.31e-05	A1CF,BHLHE40,BNC1,CAST,CELF2,CYFIP2,DPT,EML4,ENC1,ENPP1,GINS4,HTRA3,IGF1R,IGSF1,KLF11,MAF,MAT2A,MRPS23,NEK2,NFIB,NNT,NOCT,NPHS2,NR2C1,NSD1,PBRM1,PCOLCE,PCSK1,PSD3,PTPRK,SAR1B,SLC26A3,SLC38A9,SOCS6,TAC1,TBC1D8,TMEM201,TNFSF10,TOR1A,TSHZ2,VGLL3,WDR26,ZFX
miR-343 (and other miRNAs w/seed CUCCCUC)		mature microrna		1.368	bias	9.57e-05	ABI3,AK3,AMER3,AREL1,ARHGDIB,ATF6B,CCL21,CCP110,CELF2,CYP19A1,CYTH2,DESI2,DIO2,DNAJC21,DTX4,E2F3,ENC1,FAF2,FAM134A,FAM171B,FBXL20,FXYD6,HCFC2,HRH1,IRF6,KCNE3,KIAA1324,KIAA1551,LRRFIP1,MAFF,METAP1,METTL21A,MRPS33,NCOA7,NPHS2,OAF,PALLD,PDE4DIP,PFKFB3,PIK3C2B,PIK3R2,PLAU,PTOV1,PTPRG,RET,SCAMP3,SESN2,SLC2A3,SMPD4,SRSF6,STAMBP,TCF19,TMEM144,TMEM19,TMEM39A,TSPAN9,TYMS,UBTF,ZNF395
NR3C1		ligand-dependent nuclear receptor		0.507		9.69e-05	ADM,CEBPA,CYP19A1,DDIT4,DUSP1,FOS,GAS1,GHRHR,GLUL,IFIT2,IGF1,IL10,LEP,LHB,MGMT,MTCH2,MTHFD1,MYC,NFIL3,NOTCH4,PTP4A2,TCF19	229 (21)
MSTN		growth factor		1.41		9.91e-05	IGF1,IGF1R,LEP,MEF2A,MEF2C,MYOD1,SLC2A1,VEGFA	179 (23)
deferoxamine		chemical drug		1.614		9.96e-05	ADM,BHLHE40,BNIP3,EGLN1,FASN,FGF18,FLT1,GADD45A,IGF1,LEP,PFKFB3,VEGFA	230 (23)
ADORA2A		g-protein coupled receptor		1.374		0.0001	COL6A1,DUSP1,FOS,GAPDH,IFITM3,IFNG,IL10,NR4A3,PCSK1,PEG3,PENK,SLC6A3,VEGFA	220 (23)
miR-877-5p (and other miRNAs w/seed UAGAGGA)		mature microrna	Activated	2.197	bias	0.000101	A1CF,ALDOB,AMD1,BTG2,CCNA2,CEP44,CLEC14A,COL6A3,ENC1,ENO2,FAM65B,FBXO7,GINS4,GPX6,HCFC2,IGF1R,IGSF1,KIAA1324,LEP,LRRC8C,MAN1A1,NR4A3,PGM3,PTPRG,RBM25,STAMBP,TMEM144,TMX4,TNFRSF17,YLPM1
LDL		complex		0.817		0.000102	DNMT1,DUSP1,FCGR1A,FOS,GCLM,IFIT2,IFNG,IGF1,IGF1R,LRP1,NPC2,NR4A3,PECAM1,SOCS1,STAR	249 (18)
miR-3120 (and other miRNAs w/seed ACAGCAA)		mature microrna	Activated	3.838	bias	0.000106	AAK1,ANK3,ANKRD44,ARID2,ASB13,ATAD2B,BUB3,CADM1,CELF2,CRYZL1,DLAT,ENC1,ENPP1,ERO1A,FBXO41,GAS1,GSE1,GTF3C6,HDAC4,HOXD3,HTRA3,IFIT2,IGF1,KIF1B,L3MBTL3,LFNG,MEF2C,MID1,MSL3,NRCAM,ODF2L,PLEKHA8,RASA1,RNLS,S100PBP,SLC6A3,SLCO2B1,SPTLC2,TBPL1,TMEM165,TNFSF10,TOR1AIP2,USP37,WWP2,YLPM1,ZCCHC10
miR-5095 (and other miRNAs w/seed UACAGGC)		mature microrna	Activated	3.166	bias	0.000108	ARL4A,CACYBP,CAST,CDA,CELF2,COA7,EIF4G1,EXOSC2,FAAP24,FADS1,FADS6,FAM65B,FLT1,GCLM,GINS4,HILPDA,HNMT,IFIT3,IL10,INIP,INTS7,KIAA1324,KIF1B,LAMC2,LEP,LRRFIP1,MAP3K9,METTL21A,MRI1,MTF2,NAA40,NCAPG,NR2C1,PECAM1,PIK3C2B,PIK3R2,PIPOX,PNPLA3,PODNL1,PPP1R3B,PRELID2,QPCTL,RBL1,ROCK2,SLC2A3,STAR,TBC1D32,TMEM19,TMEM248,TNFSF10,TOR1AIP2,TXNDC15,VSTM4,VWDE,WWP2,ZCCHC10,ZNF322,ZNF382
miR-1909-3p (and other miRNAs w/seed GCAGGGG)		mature microrna		1.853	bias	0.000109	A1CF,AAK1,ADAM19,ALKBH5,ARHGDIB,CAMK2N2,CAPG,CBL,CD93,CDH5,CLDN2,CLN6,CRYZL1,CXCL12,DBNDD1,DNAJC15,EIF4EBP1,EIF4G1,ENPP1,EYA3,FAM155B,FASN,FBXO41,FCGR1A,FLT1,FXYD6,GPAM,GPX6,HR,HTRA3,HYAL1,IFIT3,IGF1,KATNAL1,KIAA1644,LEP,LFNG,LRRC20,LRRC8C,LRRFIP1,LYRM4,MAFF,MAP3K9,METAP1,MTHFD1,MXD4,MYO19,NELFA,NFIB,NSFL1C,PIPOX,PLLP,PNPLA3,PQLC1,PRSS12,PSD3,QSOX1,RUNDC3A,SESN2,SLC25A22,SLC27A1,SLC37A4,SLC3A2,SL…
mono-(2-ethylhexyl)phthalate		chemical toxicant		0.407	bias	0.00011	ACAT2,ACSBG1,ACSL1,CEBPA,CYP1A1,DDIT4,FADS1,FAS,FASN,FOS,GAPDH,LRP1,NFIB,ROCK2,SS18	201 (21)
miR-4525 (and other miRNAs w/seed GGGGGAU)		mature microrna	Activated	2.93	bias	0.00011	ABHD6,ACSL5,AK3,ANTXR2,ASB13,ATAD2B,BCLAF1,CADM2,CD3E,CLDN2,CLEC14A,CXADR,CXCL12,CYTH2,DCP1A,DESI2,EMILIN1,ENPP1,FAM155B,GAS7,GLDN,GLYR1,GRHL2,HR,HRH1,IFIT2,IGF1,KIAA1644,LPGAT1,LRRFIP1,MAN1A1,MAP3K9,MCUR1,NAA50,NOTCH4,NSD1,PIK3R2,PIPOX,PLBD2,PNMA1,PODNL1,PPP1R13L,PTHLH,PTPRR,R3HDM4,RNLS,RUNDC3A,SDCBP2,SLC35F2,SRGAP1,STIM1,TCEB3,TMEM201,TRIM3,TSHZ2,UBTF,WDR26,WIPI1,WNK4,ZBTB7A,ZNF32,ZNF322
ESR1		ligand-dependent nuclear receptor		-0.11		0.000113	ABCB11,CALML4,CLDN2,CYP19A1,CYP1A1,FOS,IFNG,IGF1,IGF1R,KLF1,LEP,LHB,MYC,OXT,PPP6R2,SLC13A4,STAR,VEGFA	219 (23)
PTPN1		phosphatase		-0.637		0.000115	CIDEA,DUSP1,EDEM1,FASN,IFNG,LEP,RASA1,SOCS1	160 (19)
miR-4294 (miRNAs w/seed GGAGUCU)		mature microrna		0.76	bias	0.000116	CLDN2,FADS1,FADS6,FASN,GCLM,GINS4,GLYR1,HBEGF,HEATR5A,HILPDA,IFIT3,KLRC4-KLRK1/KLRK1,LETM1,LFNG,METTL21A,MS4A2,MTAP,NAA40,NAT9,NIP7,NOCT,OSBPL8,PFKP,PHF12,PIK3R2,PLOD1,PRELID2,QPCTL,RALGDS,ROCK2,SDCBP2,SLC35F2,SLC37A4,SLC6A3,STAR,TMEM19,TMEM248,WIPF2,XPO7,ZNF692,ZNHIT6
miR-3664-3p (miRNAs w/seed CUCAGGA)		mature microrna		0.749	bias	0.000116	A1CF,AKAP12,ANKRD46,BUB3,CCT6A,CD93,CRY2,CXCL12,DNAJB9,ENSA,FAAP24,FLT1,GINS4,GJA4,GRHL2,IDE,LRRC20,MAF,MAP3K9,MAP4K4,MYBPC1,NR1I2,NSD1,PACSIN2,PATL1,PCSK1,PDE4DIP,PEG3,PFKFB3,PGM3,PLEKHA8,RAB32,RET,RGS12,RGS2,ROCK2,SCAMP5,SRSF11,TEX2,THOC2,TMEM201,VSTM4,ZER1
miR-185-5p (and other miRNAs w/seed GGAGAGA)		mature microrna		1.893	bias	0.00012	AAK1,ARSA,BTG2,CCP110,CDK5R1,CRNKL1,DNMT1,DPF2,DTX3L,EDEM1,EGLN1,ENC1,ENO2,ENSA,EYA3,FBXL20,FBXO41,FBXO9,FPGT,FXYD4,GLRX,GPX6,HSPA4,HTR1D,IDE,KIAA1644,LPCAT3,LRRC8C,LRRFIP1,LUZP1,MAT2A,MCCC1,MRPS23,MS4A2,MSL3,MXRA5,NAA40,NCAPG,NFIB,NOTCH4,NPHS2,PARP11,PARP9,PHF12,PIK3R2,PLBD2,PLEKHA8,PLSCR1,PPP1R3B,QSOX1,RBL1,SIMC1,STIM1,TCF21,TFDP1,TMCC3,TMEM165,TNFSF13,TOR1AIP2,TRAPPC13,URM1,VEGFA,VGLL3,WLS,ZFP1
miR-544-3p (and other miRNAs w/seed UUCUGCA)		mature microrna		1.876	bias	0.000121	AAK1,AMD1,B3GALNT1,BMPR1B,BNC1,BUB3,CADM1,CLEC14A,CYP19A1,DCP1A,DICER1,DIO2,DTX4,EML4,FAF2,HCFC2,HEATR1,HOXD8,HSPA4L,IDE,ITGA2,KIAA1644,LPCAT3,LPGAT1,LTN1,LUZP1,MAF,MAP10,MEF2A,NCOA7,NFIB,NSFL1C,OSBPL8,PALLD,PGM3,PTPRK,RBL1,RBM25,RCAN1,RET,SARAF,SERPINB11,SESN2,SLC25A22,SOCS1,SOCS6,SPRED1,STAMBP,STBD1,TIA1,TMCC3,TOR1AIP2,TRUB2,TSTD2,WDR33
miR-4795-5p (miRNAs w/seed GAAGUGG)		mature microrna		1.314	bias	0.000122	AKAP12,ALB,AMER3,CA9,CCDC3,DPF2,E2F3,EGLN1,FAF2,FXYD6,HDAC4,HELLS,IL10,LRTOMT,LUZP1,MAP3K9,NDUFAF6,NEK2,NFYC,PHLDB2,PIK3C2B,PIP4K2A,PLEKHA8,POLR1D,RMI2,RNLS,SLC11A2,STIM1,TMX4,TSHZ2
mifepristone		chemical drug		-1.895		0.000122	ABCB11,ADM,ALOX15,DIO2,DUSP1,FAS,FOS,HSPA4,IL10,ITGA2,LAMC2,LRP1,MYC,OXT,PFKFB3,RBL1,RGS2,SLC2A1,SNAI1,STAR	242 (23)
POU5F1		transcription regulator		0.216		0.000123	ALB,BAG3,BNIP3,CIDEA,CRADD,DNMT1,DUSP1,FAS,GADD45A,IGF1R,IRF6,MEF2A,MEF2C,MTF2,MYC,NR2F2,PECAM1,PEG3,STIM1,TNFSF10,VEGFA,WLS	89 (7)
miR-4472 (and other miRNAs w/seed GUGGGGG)		mature microrna	Activated	2.369	bias	0.000124	ACSL5,ADAR,ARL4C,BAG3,CALML4,CCDC3,CSTF1,CYTH2,EYA3,FAM155B,FAS,FBXL20,FBXO41,FCRL5,FXYD6,GAPDH,GINS4,GYS1,HR,HRH1,INTS6,KHK,KIAA1644,LFNG,LRRC8C,LRTOMT,MAF,MAN1A1,MAP3K9,MAP4K4,MCUR1,MEF2A,MTAP,NAA50,NFIB,OAF,OSBPL10,PCP4L1,PCSK2,PECAM1,PFKFB3,PGF,PHF12,PIK3R2,PLOD1,PODNL1,POLR3A,PRSS12,RAMP2,RBM25,RET,RNF40,RUNDC3A,SCAMP5,SESN2,SLC35F2,SLC6A3,SNAI1,SOCS6,SPHK1,SRGAP1,STIM1,TRIM3,TSHZ2,TSPAN9,TT…
miR-652-3p (miRNAs w/seed AUGGCGC)		mature microrna		-0.801	bias	0.000124	ADPGK,COMMD9,EMILIN1,GAS7,HLCS,HOXD3,HTR1D,MAP3K9,NR4A3,NSMCE4A,PACSIN2,PDE4DIP,PIPOX,PLBD2,RRAGD,SAR1B,SPRED1
miR-1184 (miRNAs w/seed CUGCAGC)		mature microrna		0.948	bias	0.000125	AAK1,ABI3,ADAR,ADPRHL2,ALKBH5,AMOT,AREL1,ARL4C,BBIP1,CBL,CDS2,COMMD9,CYP1A1,DCP1A,DICER1,DPT,EYA3,FAM65B,FBXL20,GGA2,HEATR1,IDE,IRF6,MAP10,MID1,MXD4,MXRA5,NFIB,NGB,NOTCH4,PPP1R3B,PSD3,PTPRG,RNF40,ROCK2,RRM2B,S1PR3,SESN2,SLC6A3,STIM1,TBC1D32,TCEB3,TNFSF10,TPP1,TSHZ2,TSPAN17,TSPAN9,VASH1,WDR33,ZDHHC14,ZMAT3,ZNF322,ZNF382
poly rI:rC-RNA		biologic drug		-0.326	bias	0.000128	ASB13,CNP,DIO2,DUSP1,EHF,FAS,FCGR1A,FOS,IFI16,IFIT2,IFIT3,IFITM3,IFNG,IL10,KRT19,MYC,NFIL3,NR4A3,PARP11,RGS2,SLPI,SOCS1,STAR,TNFSF10,ZFP36	170 (18)
miR-516b-5p (miRNAs w/seed UCUGGAG)		mature microrna		1.666	bias	0.000129	A1CF,AAK1,ABHD5,ADGRF2,ALDOB,AMER3,APITD1/APITD1-CORT,CAST,CBL,CCNA2,CD93,CEP44,CLN6,COG8,DPF2,EIF2S1,EYA3,FLT1,GAS1,GJA4,GSE1,GYS1,HRH1,KCNE3,LAMC2,LRRC20,MAB21L3,MAP4K4,MEF2A,NOTCH4,NT5DC1,PCSK2,PPP1R3B,PRSS12,PTPRR,SLC1A1,TMEM39A,TNFSF13,TTC9,WDR33,WDR93,ZFP1,ZNF280D,ZNF674
miR-4772-3p (and other miRNAs w/seed CUGCAAC)		mature microrna		0.431	bias	0.000131	ACSL1,ALKBH5,AMD1,ANTXR2,AREL1,ARSA,B3GALNT1,COL6A1,DIO2,DNAJB9,E2F3,FAM107B,GGA2,HEATR1,HSPA4L,INTS7,ITGA2,LPCAT1,LPGAT1,MEF2C,MTF2,NR4A3,PACSIN2,PALLD,SERPINB11,SLC1A1,SLC3A2,SPRED1,TMCC3,VGLL3
Calcineurin protein(s)		complex		1.914		0.000132	CYGB,DUSP1,FGF18,FOS,NFIL3,NR4A3,RCAN1,RGS2	175 (20)
JUND		transcription regulator		0.505		0.000132	COL6A1,IFNG,IL10,IVL,PENK,PLAU,SOCS1,VEGFA	167 (18)
miR-4722-3p (and other miRNAs w/seed CCUGCCA)		mature microrna	Activated	2.284	bias	0.000132	AIFM2,AKAP12,AMER3,BCLAF1,BNC1,CBL,CCDC3,CD247,CDC23,CEBPA,CERCAM,COA7,COMMD9,CRY2,CYGB,CYTH2,DDIT4,EIF2S1,ENSA,FADS1,FADS6,FAM155B,FCRL5,GINS4,HSPA4,INTS7,KCTD11,KIF1B,LETM1,METTL21A,MID1,MSL3,NOL6,OSBPL10,PARP9,PHF12,PIK3C2B,PITRM1,PNPLA3,PODNL1,PPP6R2,PQLC2,QPCTL,RXRA,SAMD8,SKP2,SLC25A22,SRSF6,TCEB3,TPCN2,TRH,TTLL12,TXNDC15,VEGFA,VSTM4,WDR26,WIPF2,ZER1
CD3E	-3.36	transmembrane receptor		-0.021		0.000133	BNIP3,CD3E,FAS,FOS,IFNG,IL10,MYC,SOCS1,SPHK1	195 (19)
miR-516a-3p (and other miRNAs w/seed GCUUCCU)		mature microrna		0.916	bias	0.000134	AMER3,ANTXR2,AP1M1,AQP11,ARL4C,CNP,COL6A3,COMMD9,CYYR1,DPT,DTX3L,DTX4,EEF1E1,EHF,FAM122A,GADD45A,GAS1,GAS7,GRHL2,HRH1,LRRFIP1,MEF2A,MTCH2,MXRA5,NAGPA,NAT9,PARP11,PHF12,PIP4K2A,PLLP,PNPLA3,PTPRK,RGS12,RHPN2,S100B,SLC2A3,SPRED1,TJP2,TOR1AIP2,URM1,WDR33,ZER1
CSF2		cytokine		-0.768	bias	0.000136	CCNA2,EXO1,FAM65B,FAS,FCGR1A,FLT1,FOS,GCLM,HBEGF,HSPH1,IFITM3,IFNG,IGF1,IL10,KCTD11,KLF1,LEP,LTB,MAT2A,MYC,NEK2,PLAU,QSOX1,RRM2B,SLC11A2,SOCS1,TOP2A,ZFP36	222 (20)
miR-3617-5p (and other miRNAs w/seed AAGACAU)		mature microrna	Activated	2.081	bias	0.000136	AHCTF1,AMOT,BNC1,CCNA2,CELF2,DNAJC21,DTX3L,EMB,ERO1A,FAM162B,HILPDA,ITGB8,LPAR6,LRRC8C,METTL21A,NNT,NR2C1,PALLD,PCSK2,PRSS12,PTPRG,RRAGD,RRS1,TAC1,TMTC4,TSHZ2,USP37,WDR33,ZNF32
UBE2I		enzyme		-1.067		0.000137	ABCB11,ALB,CEBPA,HBB,SLC2A1
TACR1		g-protein coupled receptor		-1.231		0.000137	FOS,IFNG,IL10,LEP,TAC1	203 (17)
VCAN		other		-1.976		0.000137	ADM,ATRN,CD247,CIDEA,CXCL12,FAS,IFNG,MEF2C,METRNL,PENK,RGS2,RXRA,VEGFA	164 (12)
miR-3677-3p (miRNAs w/seed UCGUGGG)		mature microrna		1.97	bias	0.000138	AKAP12,CD3E,CELF2,CEP44,DPT,FAF2,FAM134A,IGF1R,KLF1,LFNG,LUZP1,MAB21L3,MS4A2,MTSS1,NSFL1C,OAF,PIK3R2,RCAN1,RNLS,SLC1A1,SPHK1,TRUB2,WIPI1
miR-642a-3p (and other miRNAs w/seed GACACAU)		mature microrna	Activated	2.225	bias	0.000139	ADAR,BCLAF1,CBL,CCNA2,CELF2,CYYR1,ENO2,FAM57A,FLT1,GLT8D1,GPATCH2,IFNG,ITGB8,LRIG3,MAN1A1,MOAP1,MXRA5,NCOA7,PARP11,POLR1D,PTPRG,SAR1B,SCARA5,SLC35F2,STAMBP,TAC1,TMEM201,TNFRSF17,TXNDC15,VGLL3,WDR93
IL13		cytokine		-0.267		0.000139	ACSL1,ALOX15,CCL24,CD247,CEBPA,FADS1,FAS,FCGR1A,GAS7,HRH1,IFNG,IGF1,IL10,IVL,MAF,MCUR1,MTSS1,MYOD1,PFKP,PITRM1,PLAU,QSOX1,SLPI,SOCS1,SPHK1	252 (20)
miR-3611 (miRNAs w/seed UGUGAAG)		mature microrna		1.312	bias	0.00014	AHCTF1,ANKRD10,CADM2,DPF2,DUSP1,EHF,HN1,IDE,ITGA6,LGMN,MRPL32,MS4A2,MSL1,ODF2L,OSBPL8,PAPOLA,PATL1,PTHLH,PTPRK,RNLS,SLC11A2,SLC19A2,SPRED1,TMCC3,TXNDC15,WIPF2,ZFYVE1
IL17A		cytokine		0.016		0.00014	CXCL12,CXCL13,FAS,FOS,GADD45A,HBEGF,IFNG,IL10,IVL,LEP,MYC,PECAM1,PGF,PLAU,SLC2A1,STEAP4,VEGFA	217 (18)
Immunoglobulin		complex		-1.668		0.000141	ACSL1,ADM,ANPEP,DUSP1,EGLN1,FAS,FCGR1A,FOS,GAS7,IFNG,IL10,MAFF,NFIL3,PLSCR1,RGS2,RNF128,SMOX,TNFSF13	212 (19)
Histone h3		group				0.000143	ABCB11,AKAP12,CA9,CCNA2,CEBPA,CYP19A1,FLT1,FOS,IFITM3,IFNG,IGF1,IL10,INHA,KDR,MGMT,RCAN1,SNAI1,SPHK1,STAR,VEGFA,WLS	211 (18)
miR-4640-5p (and other miRNAs w/seed GGGCCAG)		mature microrna		1.37	bias	0.000145	AAK1,ANKRD46,ANKS3,APOA4,ARHGDIB,BRF2,CADM1,CALML4,CD3E,CDK5R1,CLN6,CYGB,CYP19A1,DNAJC7,DPF2,DTX4,EMILIN1,FAM134A,FAM193B,FAM65B,FBXO41,FXYD4,GAS7,GLDN,GLRX,GLYR1,GPR39,GYS1,HCFC2,ITGA2,KIAA1644,LGI4,LRPPRC,LRRC20,LRTOMT,LTN1,LUZP1,MAB21L3,MAFF,MAN1A1,MED15,MTAP,NAT9,NDUFA5,NDUFAF6,OAF,PCP4L1,PHYHD1,PIK3R2,PKIG,PNPLA3,PQLC1,PSD3,R3HDM4,RASSF1,RBL1,RET,RGS12,RNF40,ROCK2,RXRA,S100B,SCAMP5,SLC13A4,S…
miR-3938 (miRNAs w/seed AUUCCCU)		mature microrna	Activated	2.361	bias	0.000146	ABHD5,AMOT,BAG3,CACYBP,CRNKL1,CRYZL1,CYGB,DECR1,DNAJC15,EXOSC2,FCGR1A,FGF18,GGA2,IFNG,INIP,LRTOMT,LUZP1,MID1,NANP,NCOA7,NDUFAF6,NOLC1,PLEKHA8,RBL1,RGS2,SF3B1,SS18,TNFSF10,TPP1,XPO7,ZCCHC10,ZFP1
IFNB1		cytokine		-0.41		0.000147	ANXA5,BHLHE40,CYP1A1,DICER1,FOS,GAS1,IFI16,IFIT2,IFIT3,IFNG,IL10,KLRC4-KLRK1/KLRK1,MYC,NMI,NOCT,PHLDB2,SOCS1,TNFSF10,ZDHHC14	191 (17)
RARA		ligand-dependent nuclear receptor		0.983		0.000148	CYP19A1,DUSP1,FOS,HOXA1,IFNG,IRF6,MXD4,MYC,NR2C1,OXT,PENK,RET,TRH	214 (18)
miR-4638-3p (and other miRNAs w/seed CUGGACA)		mature microrna		0.79	bias	0.000148	ADAR,AMD1,ANK3,APOA4,ART3,BHLHE40,CDC23,CLDN2,CRNKL1,CRY2,DLAT,DTX3L,EML4,EYA3,FBXL20,GPATCH4,GPX6,HILPDA,IRF6,IVL,KCNE3,KCTD11,KHK,KIF1B,NCAPG,NFIA,NR4A3,NT5DC1,PHACTR1,PIP4K2A,RBFA,SARAF,SHE,SLC2A1,TNFSF13,TSPAN17,VGLL3,ZER1,ZNF674
A23187		chemical reagent		-0.015		0.000149	AMD1,FOS,IFNG,IGF1,LHB,MYC,RCAN1,SLC2A1,STAR,TNFSF10,VEGFA	189 (20)
miR-361-5p (miRNAs w/seed UAUCAGA)		mature microrna		1.987	bias	0.000152	AAK1,ARID2,CADM2,CELF2,CSTF1,CXADR,CYYR1,EHF,FLRT2,FUCA1,GLRX,IGF1,IL10,LGR4,LPCAT1,MAP10,MAP3K9,MID1,MYCBP,NFIA,NFIB,ODF2L,PARP11,PEG3,PGM3,PTPRG,RBM25,TCF19,TFDP1,TIPIN,VEGFA,VWDE,ZMAT3
miR-519a-3p (and other miRNAs w/seed AAGUGCA)		mature microrna		1.838	bias	0.000153	ABHD5,ACTL6A,AHCTF1,ANTXR2,BNC1,CCP110,CELF2,CEP70,CERCAM,CNP,CRY2,CXCL12,ENSA,GPATCH2,HOXD8,INTS6,KATNAL1,MAP10,MAP3K9,NAA50,NFIA,PAPOLA,PECAM1,PLEKHA8,PPP1R3B,PTHLH,RAB32,RBM25,RNF128,RNLS,ROCK2,RRAGD,SAR1B,SRGAP1,STARD8,TEX2,TSHZ2,WDR33,ZDHHC14
Ras		group		1.394		0.000153	ANPEP,BNIP3,CEBPA,FOS,IFNG,IGF1,IVL,LHB,MYC,PLAU,SNAI1,VEGFA	189 (20)
Jnk		group		0.653		0.000153	ANXA5,CXCL12,DNMT1,DUSP1,FAS,FOS,GADD45A,IFNG,IGF1,LHB,MYC,PLAU,PLSCR1,SESN2,ZFP36	228 (23)
miR-548b-3p (miRNAs w/seed AAGAACC)		mature microrna	Activated	2.355	bias	0.000157	AKAP9,CDC27,CDS2,CSTF1,DENND4B,DLAT,ENOPH1,FAM171B,FAM57A,FAM65B,GLUL,LAMC2,LRRC8C,MS4A2,NELFA,NSFL1C,PECAM1,PIK3C2B,PNPLA3,SLC11A2,SLC2A3,SOCS6,SPTLC2,TOR1AIP2,XPO7
miR-4437 (miRNAs w/seed GGGCUCA)		mature microrna	Activated	2.729	bias	0.000158	AAK1,ABI3,CAMK2N2,CDS2,CEP44,COMMD9,CXCL12,DBNDD1,DEGS2,DMBT1,DNAJC15,DTX4,ENOPH1,FAM65B,FLT1,GAS1,GLDN,GLUL,GRHL2,HR,KCNE3,KCTD11,KDR,KIF1B,LRRC20,LYRM4,MAP3K9,MCUR1,MECR,MEF2A,MRI1,NAA40,NR2C1,PCSK1,PEX3,PODNL1,POLR3A,PQLC1,R3HDM4,RASSF1,RBL1,RXRA,SCAMP5,SPRED1,STAMBP,TCEB3,TCF19,TCF21,TOR1A,TOR1AIP2,TRH,TRUB2,UBTF,VASH1,VSTM4,XPO7,ZFYVE1,ZNF674
miR-4512 (miRNAs w/seed AGGGCCU)		mature microrna	Activated	3.365	bias	0.000159	ABHD5,AK3,AMER3,ARSA,B3GALNT1,CADM1,CDC27,CERCAM,CLN6,CWC22,DCP1A,DPF2,EMB,FAM65B,FBXO41,GLYR1,IGSF1,IVL,LRTOMT,MAF,MED15,MSL1,NR1I2,NR2F2,NRCAM,PARP9,PBRM1,PNPLA3,PODNL1,PPP6R2,RHPN2,S100PBP,S1PR5,SCAMP5,SLC25A20,SLC3A2,TOR1AIP2,TPCN2,TSPAN17,TSTD2,VASH1,VGLL3,WAS,WDR81,WIPF2,WWP2,ZFYVE1,ZNF630,ZNHIT6
miR-4417 (miRNAs w/seed GUGGGCU)		mature microrna	Activated	2.532	bias	0.000159	ABI3,ADAM19,AIFM2,AMER3,ANK3,ANPEP,ARSA,CELF2,CEP44,COMMD9,CYTH2,DTX3L,EXOSC2,FAF2,FAM122A,FLT1,GLYR1,GPATCH4,GSE1,HRH1,IFIT3,INTS6,INTS7,ISOC1,LETM1,LGI4,LPGAT1,MAB21L3,MAP3K9,MECR,MSL3,MTSS1,MXD4,PDE4DIP,PEX3,PKIG,S1PR3,SLC2A3,SPRED1,SRGAP1,TMEM201,TMEM45A,TOR1A,TTC9,UBTF,VASH1,WBP2,WDR33,WLS
miR-3922-5p (miRNAs w/seed CAAGGCC)		mature microrna	Activated	2.145	bias	0.00016	AMOT,BBIP1,CCDC3,CDC27,CYP19A1,CYP1A1,CYTH2,DCP1A,DLAT,DNMT1,ENO2,FAM155B,FAM171B,FBXL20,FBXO41,FBXO7,GNA11,GPR39,GSE1,HBB,HEATR1,HILPDA,INTS6,KIF1B,LRRC20,LRTOMT,MAT2B,MCAT,MRPS33,NIP7,PLLP,PTOV1,PTPRG,PTPRK,SDCBP2,SMPD4,SRGAP1,SRSF6,TMEM201,TOR1A,UBE2F,USP37,ZFX,ZNHIT6
miR-4284 (miRNAs w/seed GGCUCAC)		mature microrna	Activated	3.085	bias	0.000163	AKIP1,ANKRD44,ANPEP,ASB13,BTG2,BUB3,CIDEA,CYTH2,DTX3L,EIF2S1,ENC1,ENTPD5,FADS6,FAM134A,FAM65B,GCLM,GGA2,GINS4,GLDN,HEATR5A,HOXA1,IFIT3,LAMC2,LEP,LPCAT3,LRPPRC,LRRC20,LRRFIP1,LRTOMT,MAB21L3,MAP3K9,MCUR1,MECR,MRI1,MYC,NANP,NASP,NIP7,POLR3A,QPCTL,RBL1,RGS12,RNF40,S100PBP,S1PR3,SLC11A2,SLCO2B1,SPTLC2,SS18,TBC1D32,TCF19,TEX2,TMEM19,TXNDC15,USP37,VASH1,VSTM4,ZER1,ZFYVE1,ZNF395
S100A8		other		1.868		0.000164	AKAP12,BHLHE40,CDH3,CP,CSTF1,CXCL14,DDIT4,FAS,IGF1,IL10,MGMT,NR4A3,PLAU,PRSS12,SDCBP2	225 (16)
arachidonic acid		chemical - endogenous mammalian		1.566		0.000164	FADS1,FAS,FASN,FOS,KDR,PECAM1,PENK,PLAU,RGS2,STAR	179 (20)
miR-4758-3p (miRNAs w/seed GCCCCAC)		mature microrna	Activated	2.228	bias	0.000164	A1CF,AKAP12,ALKBH5,ANKS3,AREL1,ARSA,ASB13,CDH5,CELF2,CLN6,COMTD1,CXCL12,CXCL13,CYGB,CYTH2,DUSP1,EDEM1,EYA3,FAM122A,FAM134A,FAM155B,FBXO9,FCRL5,GAS1,GRHL2,GYS1,HDAC4,IGF1R,KCTD11,KIF3A,LPCAT1,MAP4K4,MED15,MSL3,NAA50,NAGPA,NSD1,OAF,OAZ2,PIK3C2B,PQLC1,PRSS12,PTOV1,QSOX1,RASSF1,RBL1,RGS12,RPS19BP1,RRAGD,RXRA,S1PR3,S1PR5,SCARA5,SLC25A22,SNAPC5,SS18,STIM1,TBC1D8,TCF21,TJP2,TMEM201,TSHZ2,TSPAN9,TTLL12,U…
CREBBP		transcription regulator		1.311		0.000165	AKAP12,AQP11,CAPG,CBL,CDH5,CEBPA,CXCL12,DUSP1,FOS,HBB,IFNG,IGF1R,INHA,IRF6,ITGA6,KIF1B,MAF,MEF2C,MYC,MYCBP,MYOD1,PIPOX,STAR,VEGFA	234 (25)
SMAD3		transcription regulator	Activated	2.423		0.000167	ALB,APOA4,CDH5,COL6A1,COL6A3,CYP19A1,FOS,HBEGF,IFNG,INHA,LHB,MYC,MYOD1,PTHLH,SNAI1,VEGFA,ZFP36	230 (25)
PITX2		transcription regulator		0.823		0.000168	DLX2,GADD45A,IRF6,MSC,MYC,PLOD1,POU1F1,SNAI1,TCF21
miR-1283 (miRNAs w/seed CUACAAA)		mature microrna		0.698	bias	0.00017	ACTL6A,ANKRD10,ATAD2B,CELF2,DUSP1,FAS,HOXD3,KIF3A,KLF11,LETM1,LTN1,MAFF,MS4A2,MTF2,MTSS1,NR4A3,OSBPL10,PEX12,PHLDB2,PIGC,RBM25,SRSF6,STAMBP,TMEM144,TPST1,VGLL3,ZCCHC10
miR-4293 (miRNAs w/seed AGCCUGA)		mature microrna		0.507	bias	0.00017	ABHD17C,ADAR,ADGRA3,ALKBH5,ANTXR2,CACYBP,CALML4,CLEC14A,DESI2,DGUOK,FLT1,GPR39,LETM1,LRTOMT,MAB21L3,MED15,METAP1,MID1,NR4A3,OSBPL8,PDE4DIP,PECAM1,RALGDS,RRM2B,SAMD8,SAR1B,SLC11A2,SLC1A1,SLC2A1,SOCS4,TPP1,TSHZ2,VASH1,WDR26,WWP1,ZCCHC10
miR-4524a-5p (and other miRNAs w/seed UAGCAGC)		mature microrna	Activated	2.39	bias	0.000177	ABHD5,ABI3,ACSBG1,ADAMTS3,ALDOB,ANKRD46,AQP11,AREL1,ARSA,CALML4,CAST,CDC27,CDK5R1,DKC1,E2F3,ENSA,FAM122A,FAM65B,IGF1,KATNAL1,MACF1,MAMDC2,MSL3,MTAP,ODF2L,PEX12,PPRC1,PTPRR,SESN1,SLC11A2,SLC19A2,SLC2A3,SOCS6,SPRED1,TMEM248,TNFSF10,VEGFA,XPO7,ZNF280D,ZNHIT6
miR-3158-5p (and other miRNAs w/seed CUGCAGA)		mature microrna	Activated	2.192	bias	0.000177	AMOT,ARID2,BMPR1B,BNC1,CLEC14A,DICER1,DPT,ENSA,FAF2,FAM107B,GGA2,GJA4,GPATCH4,GPX6,HBEGF,HOXD8,HTRA3,IGF1R,LGMN,LPCAT1,LYRM4,MAMDC2,MEF2A,MRPS23,MXD4,MYBPC1,NASP,NRCAM,PEG3,PFKFB3,PNPLA3,PODNL1,POLR1D,RBL1,RNLS,S100PBP,S1PR5,SLC1A1,SLC38A9,TIA1,TIGD2,TSHZ2,TSPAN17,VSTM4,WDR33,WDR93
STAT2		transcription regulator		-0.279		0.000177	IFI35,IFIT2,IFIT3,IFNG,IL10,SOCS1,TNFSF10	187 (13)
GW501516		chemical drug				0.000179	ACSL1,CCL21,COL6A1,DECR1,FASN,FLT1,KRT19,SLC27A1,SLPI,VEGFA,VLDLR	156 (21)
miR-1231-3p (and other miRNAs w/seed GCCCUGU)		mature microrna	Activated	2.073	bias	0.000179	ACSL1,ADAM19,ANPEP,ARL4C,CD247,CDS2,CNP,CXCL12,CYFIP2,CYP1A1,DNAJC21,EDEM1,FAM134A,FBXO41,FLT1,GGA2,GLRX,KCNE3,KIAA1644,KIF3A,LRRFIP1,MAP3K9,MAT2A,MID1,MRI1,MTSS1,MYOD1,NRCAM,ODF2L,PECAM1,PHLDB2,PIK3C2B,PLAU,PLEKHA8,PPP6R2,PRELID2,RASSF1,RBFA,RXRA,S1PR3,SCAMP5,SOCS4,STARD8,STIM1,TCF19,VASH1,VEGFA,WDR81,ZBTB7A,ZNF322,ZNF395
miR-3135a (miRNAs w/seed GCCUAGG)		mature microrna	Activated	2.56	bias	0.000181	AAK1,ALOX15,AREL1,ATRN,CADM1,CCP110,COL6A1,CSRP2,DNAJC21,EGLN1,FAM155B,FCGR1A,FPGT,GINS4,GLUL,HBEGF,INTS6,ITGA2,MAT2B,MECR,METTL21A,NAA40,NOCT,ODF2L,PCP4L1,PHF12,PTOV1,RRS1,S100PBP,SCAMP5,SLC37A4,SMC4,TMEM144,TP53RK,WDR33,ZER1
miR-4635 (miRNAs w/seed CUUGAAG)		mature microrna		1.782	bias	0.000181	ACSL5,ADGRF2,AP1M1,B3GALNT1,CDC27,CXCL12,FAM171B,GINS4,MAP4K4,MTCH2,MTHFD1,PLEKHA8,PLSCR1,PRELID2,PTPRR,RNF128,SMC4,STIM1,TRAPPC13,WDR33,WIPF2
MC4R		g-protein coupled receptor		1.236		0.000182	FASN,FOS,IL10,LEP,TRH	228 (24)
cyclooxygenase		group		0.492		0.000182	FOS,IGF1,IL10,RGS2,TAC1	221 (19)
GHRH		other		0.485		0.000182	FOS,GHRHR,IGF1,LEP,POU1F1	218 (22)
miR-4283 (miRNAs w/seed GGGGCUC)		mature microrna	Activated	2.862	bias	0.000183	ABI3,ACSBG1,AKAP12,AMER3,ARL4C,CLN6,CNP,COL6A1,COMMD9,CXCL12,CYTH2,DBNDD1,DCP1A,DLX2,E2F3,EGLN1,EIF4G1,ENO2,ENSA,FADS6,FBXO41,GAS7,GLDN,GLUL,GPAT3,GRHL2,GYS1,HRH1,IGF1R,IGSF1,IKBKG,IL10,KIF1B,LGMN,LRP1,LRRC20,LRRFIP1,LYRM4,MECR,MTCH2,NAA40,NAT9,NOL6,NSD1,ODF2L,PIP4K2A,POLR3A,R3HDM4,RBL1,RNLS,RUNDC3A,SCAMP5,SLC11A2,SLC25A22,SLC27A1,SLC35D2,SNAI1,STARD10,TBC1D8,TCAP,TFDP1,TMEM201,TMEM86A,TRH,TRRAP,…
miR-543-3p (and other miRNAs w/seed AACAUUC)		mature microrna	Activated	2.591	bias	0.000183	ABCB11,ACSL1,AHCTF1,AK3,ANTXR2,ARID2,ARL4A,BHLHE40,CBL,CDS2,CELF2,CP,DCP1A,EYA3,FADS1,FAM155B,FLRT2,FOS,GLRX,HNMT,ID4,IL10,ITGB8,KCNE3,KCTD8,KIF3A,LRRFIP1,MAF,METAP1,MTCH2,MTF2,NANP,NCK2,NFIB,NRCAM,OAZ2,PCSK1,PEG3,RRAGD,SOCS4,STEAP4,TFDP1,TSHZ2,VEGFA,VSTM4,ZFX,ZNF280D
miR-293-5p (and other miRNAs w/seed CUCAAAC)		mature microrna	Activated	3.11	bias	0.000184	ALDOB,ANTXR2,ATP2B2,BAG3,BCLAF1,BUB3,CADM2,CELF2,DCP1A,DROSHA,ENOPH1,FAM107B,FBXL20,GSE1,ITGB8,KIF3A,LRRC20,LTN1,LYRM4,METTL17,MSL3,NAA50,NT5DC1,PDE4DIP,PIK3C2B,PPIG,SAR1B,SHE,SLC35F2,SRSF6,STEAP4,TSHZ2
miR-4649-5p (and other miRNAs w/seed GGGCGAG)		mature microrna		-0.293	bias	0.000184	ADM,AIFM2,ALKBH5,CDK5R1,CEP44,CYTH2,DLX2,DUSP1,EGLN1,ENO2,FXYD4,GLYR1,HILPDA,IFITM3,LAMC2,LFNG,LRP1,NCK2,NOL6,PECAM1,PHF12,PIK3C2B,R3HDM4,RRM2B,SCAMP5,TMEM144,TMEM201,TSPAN9,TTC9,VEGFA,VSTM4,ZNF674
metformin		chemical drug		-0.128		0.000186	CYP19A1,DDIT4,DICER1,FASN,FOS,IFNG,IGF1,IGF1R,IL10,LEP,MYC,SLC2A1,STAR	219 (21)
RNA polymerase II		complex				0.000186	CD3E,CEBPA,CYP1A1,DUSP1,FLT1,FOS,GADD45A,GAPDH,HBB,HOXA1,IGF1,MEF2A,MEF2C,MYC,RALGDS	165 (9)
miR-617 (miRNAs w/seed GACUUCC)		mature microrna		1.145	bias	0.00019	ADAM19,ADPRHL2,AKAP12,ANKRD46,ATP2B2,BHLHE40,CDC27,CELF2,CLN6,COMMD9,CXCL12,DROSHA,GLT8D1,IKBKG,IVL,L3MBTL3,LRRFIP1,MEF2A,MTHFD1,ODF2L,POLR3A,SCARA5,SLC6A3,SOCS6,STBD1,TMEM19,TMEM39A,URM1,ZER1,ZFX,ZMAT3,ZNF395
miR-1295a (miRNAs w/seed UAGGCCG)		mature microrna		-0.622	bias	0.000201	ABHD6,AIFM2,ARL4C,BHLHE40,ENO2,ENPP1,ENSA,FAM188A,GCLM,ITGA6,KIF1B,LRTOMT,MRI1,MSL3,MYF6,MYO19,NFIB,PBRM1,PCSK1,POLR1D,SCARA5,STBD1,STIM1,TOR1AIP2,VGLL3
miR-590-3p (miRNAs w/seed AAUUUUA)		mature microrna	Activated	3.074	bias	0.000205	A1CF,AAK1,ANK3,ANTXR2,ATRN,CADM2,CALML4,CEP44,CEP70,DCP1A,DICER1,DNAJC21,DNAJC3,DROSHA,DTX3L,DYNC2LI1,E2F3,EHF,EIF2S1,EWSR1,FAM122A,FAM65B,GCLM,GSE1,HEATR1,IDE,IGF1,ITGA6,LRP1,LRRC8C,LRRFIP1,LTN1,MACF1,MAF,MAP4K4,MEF2A,MSL1,NAA50,NANP,NDUFA5,NFIB,NOL6,NOLC1,OSBPL8,PEX3,POLR3A,RBL1,RBM25,SHE,SLC19A2,SOCS4,TMTC4,TOB1,TOR1AIP2,TRAPPC13,TSHZ2,TXNDC15,USP37,WDR26,ZMAT3
nitroprusside		chemical drug		1.236		0.000207	ADM,FAS,FLT1,FOS,IGF1,MYC,VEGFA	221 (17)
miR-503-5p (miRNAs w/seed AGCAGCG)		mature microrna	Activated	2.043	bias	0.000208	ANK3,AQP11,AREL1,CDC27,CDK5R1,CIDEA,COL6A1,DCP1A,E2F3,EIF4G1,ENSA,FAM122A,FAM65B,FCGR1A,FUCA1,IGF1,IGF1R,IKBKG,KATNAL1,LRRFIP1,MAMDC2,MTAP,MTCH2,ODF2L,PEX12,POLR3A,PTPRR,SDCBP2,SLC11A2,SLC2A3,SOCS6,SPRED1,TMEM248,TNFSF10,VEGFA,WWP2,XPO7,ZER1,ZMAT3,ZNF280D,ZNHIT6
ulipristal acetate		chemical drug		0		0.00021	ADM,FLT1,KDR,VEGFA	87 (7)
miR-4778-5p (miRNAs w/seed AUUCUGU)		mature microrna		1.61	bias	0.000212	ACTL6A,ANK3,CALML4,CCP110,DICER1,GPAT3,IRAK1BP1,ITGB8,MTHFD1,MTSS1,NEK2,NIP7,PARP9,PCSK1,PEX12,PGM3,PHLDB2,RCAN3,SLC26A3,SOCS6,TMEM248,WDR26,ZCCHC10,ZNF630
UCP1		transporter		0.88		0.000215	AMD1,EIF4EBP1,EMB,FASN,GADD45A,LEP,MTHFD1,MYC,PHYHD1,PSD3,SLC3A2,SMOX,STBD1	91 (7)
ZFHX3		transcription regulator				0.000221	ALB,IFITM3,MYF6,MYOD1,POU1F1,PYGM,RGS2,SSB,TAC1,TRH
miR-4720-5p (and other miRNAs w/seed CUGGCAU)		mature microrna	Activated	2.186	bias	0.000221	ANXA5,CCNA2,CDC27,DRAM2,DTX3L,EGLN1,EIF2S1,FAF2,FAM57A,FLT1,GPAT3,HOXA1,IGSF1,INTS7,ITGB8,KIAA1644,LRIG3,MAP10,NAA50,NOCT,OSBPL10,PAPOLA,PDE4DIP,PNMA1,POLR3A,PRSS12,PTPRK,R3HDM4,RASA1,SF3B1,SOCS6,STIM1,TCAP,TMEM19,USP37,WDR33,WDR81,WLS,ZNF692
CD38		enzyme		1.739	bias	0.000224	AK3,BNIP3,EGLN1,EIF4EBP1,ERO1A,GPAM,LFNG,LRRC8C,NEK2,NFIL3,PFKP,SLC16A3,SLC2A1,SOCS1
L-dopa		chemical - endogenous mammalian		1.015		0.000225	ABI3,ADAR,AIFM2,AREL1,CAPG,CLN6,CRY2,CXCL12,DUSP1,FOS,GAPDH,GAS7,GPR39,HBEGF,KIAA1551,MAT2A,MEF2C,MTF2,NASP,NDUFA5,NOCT,NPC2,OAZ2,PCSK2,PDE4DIP,PENK,PFKP,PQLC2,RUNDC3A,SKP2,SLC11A2,SLC25A14,SLC2A1,TAC1,VLDLR,YLPM1,ZNF280D	227 (15)
miR-3173-3p (and other miRNAs w/seed AAGGAGG)		mature microrna		1.89	bias	0.000225	AAK1,ADAMTS3,ALOX15,ANKRD10,APITD1/APITD1-CORT,ARSA,CBL,CD93,CYGB,DESI2,E2F3,EIF4EBP1,ENOPH1,FAM134A,FAM57A,FBXL20,GAS7,GLUL,GPX6,HOXD3,IRF2BP1,KIF1B,LEP,MAN1A1,MS4A2,MSL1,MXRA5,NOL6,NR2C1,PATL1,PFKFB3,PIP4K2A,PPP6R2,PTP4A2,PYGM,RXRA,SPRED1,TMTC4,TOB1,TOP2A,ZBTB7A
miR-202-3p (and other miRNAs w/seed GAGGUAU)		mature microrna		-0.176	bias	0.000228	AAK1,ABHD17C,ADAMTS3,AMER3,BTG2,CBL,COL6A3,CYP19A1,DICER1,DNAJB9,DTX4,DUSP1,EIF4EBP1,ERO1A,EYA3,FAS,GAS7,GRHL2,HCFC2,IGF1,IGF1R,IGSF1,IL10,KATNAL1,KIAA1644,KIF1B,LPGAT1,LRIG3,MAP4K4,MEF2C,MYCBP,NAA40,PLEKHA8,PQLC2,PTP4A2,RRAGD,S100PBP,SIMC1,SLC35D2,SLC37A4,SLC38A9,SOCS4,SRGAP1,THOC2,TOR1AIP2,TPP1,TSPAN9,VGLL3,ZMAT3,ZNF322
miR-769-5p (miRNAs w/seed GAGACCU)		mature microrna	Activated	2.338	bias	0.000231	APITD1/APITD1-CORT,ASB13,BNC1,CADM2,CEP44,CERCAM,DIO2,DNAJC3,DTX4,ENC1,IGF1R,IL10,KCNE3,KCTD11,LPAR3,LRPPRC,METTL21A,MGMT,NAA40,NGB,NOLC1,NT5DC1,PLEKHA8,PTP4A2,S100B,S1PR3,SAR1B,SCAMP3,SPTLC2,TCEB3,WDR26,ZNF280D,ZNF395
MAP2K1		kinase		0.33	bias	0.000231	ACSBG1,CDH5,CEBPA,DUSP1,FASN,FOS,IGF1R,IVL,LHB,MYC,PECAM1,STAR,VEGFA	216 (20)
miR-708-5p (and other miRNAs w/seed AGGAGCU)		mature microrna		0.389	bias	0.000232	AAK1,ANKRD37,ATAD2B,ATRN,BHLHE40,CBL,COMMD9,CYTH2,DBNDD1,EDEM1,ENSA,EYA3,FLT1,GAS1,GLRX,HILPDA,HOXA1,HOXD8,INTS7,ITGB8,LUZP1,MAFF,MAT2A,METTL21A,MTSS1,MYCBP,NAGPA,NR4A3,ODF2L,OSBPL10,PAPOLA,PEX12,PTPRR,QSOX1,RBFA,RRM2B,SAMD8,SESN1,SLC37A4,SRSF11,SRSF6,STARD8,VASH1,WIPF2,ZNF322
miR-3690 (miRNAs w/seed CCUGGAC)		mature microrna	Activated	2.255	bias	0.000233	ADAM19,AHCTF1,ATRN,CCDC3,CELF2,CERCAM,CXCL12,CXCL13,CYYR1,DBNDD1,ENSA,GINS4,HOXA1,IFIT2,IRF6,KIAA1644,LEP,LRRFIP1,MAFF,MED15,PAPOLA,PIK3C2B,PIP4K2A,PLLP,PPP1R13L,PRELID2,R3HDM4,RGS12,RPS19BP1,S1PR3,SAR1B,SDCBP2,SLC25A22,SLC35F2,SMPD4,TCF21,TMEM86A,WDR81,WWP2,ZER1
miR-17-2-3p (and other miRNAs w/seed CUGCACU)		mature microrna		0.633	bias	0.000239	A1CF,ADGRF2,ANKRD10,BCLAF1,CAPG,CEP44,CXADR,DIO2,DNAJC3,DPT,FAM171B,FAS,FOS,GLRX,HLCS,ISOC1,MAP4K4,MS4A2,MTF2,NT5DC1,PECAM1,PNMA1,PNPLA3,PPP1R3B,RCAN1,SCARA5,SESN2,SLC35F2,STBD1,TFDP1,VEGFA,XPO7
KLF15		transcription regulator		-0.989		0.000241	ACSL1,DECR1,FASN,GPAM,NPHS2,SLC25A20,SLC27A1
DRD3		g-protein coupled receptor				0.000245	FOS,LEP,SLC6A3	79 (7)
PINK1		kinase				0.000245	BNIP3,SLC2A1,VEGFA	129 (7)
miR-512-5p (miRNAs w/seed ACUCAGC)		mature microrna	Activated	2.397	bias	0.000247	ALDOB,ARL4C,BBIP1,BHLHE40,CCDC3,DIO2,EGLN1,EHF,EXOSC2,GPR39,KCNE3,MAP10,METTL21A,MYC,NANP,OAZ2,ODF2L,PARP11,PCP4L1,PCSK1,PGM3,PNMA1,PNPLA3,SRGAP1,STARD8,STEAP4,TFDP1,TMEM201,TNFSF13,TP53RK,TYMS,ZFX
CD40LG		cytokine		0.135	bias	0.000253	BNIP3,CELF2,DDX42,DECR1,DUSP1,EIF2S1,FAS,FLT1,FOS,GADD45A,IFIT2,IFIT3,IFNG,IL10,METAP1,MYC,PLAU,PTPRG,RASA1,RGS2,TNFRSF17,VEGFA,XPO7	201 (18)
DIO3		enzyme	Activated	2.219		0.000253	COL6A1,FXYD6,HR,ITIH3,MAMDC2,TRH	86 (7)
miR-219a-5p (and other miRNAs w/seed GAUUGUC)		mature microrna	Activated	2.886	bias	0.000255	AKAP12,ANKRD44,ARL4C,CADM2,CCNA2,CDH3,CELF2,CYP19A1,EYA3,FAM57A,FBXO41,FLT1,FPGT,GSE1,HOXA1,HSPA4L,ITGA2,KIF1B,LPGAT1,MTAP,NFIA,NFIB,NR1I2,PKIG,PLEKHA8,RBM25,RXRA,S100PBP,SMC4,TMX4,WWP2
ELAVL1		other		-0.152		0.000261	EIF4G1,FOS,GSS,MYC,MYOD1,PCOLCE,TIA1,VEGFA,ZFP36	82 (7)
RARB		ligand-dependent nuclear receptor		-1.912		0.000261	CDH5,CXCL12,GADD45A,HOXA1,OXT,RET,SLC2A1,TAC1,VEGFA	138 (14)
miR-4286 (miRNAs w/seed CCCCACU)		mature microrna		1.615	bias	0.000262	AK3,ALKBH5,AREL1,ARID2,CACYBP,CD93,CDK5R1,CIDEA,CNP,COMTD1,CXCL12,DCP1A,DPF2,ERO1A,FADS1,FBXO41,FCGR1A,GLUL,GLYR1,KCTD11,LRRC20,MCAT,MS4A2,MSL1,MXRA5,NANP,NSD1,OSBPL8,PARP9,PCP4L1,PFKFB3,PGF,PGM3,PIK3C2B,PLEKHA8,PODNL1,PPP1R3B,PQLC1,PRMT9,R3HDM4,RASSF1,TCEB3,TCF21,TEX2,TJP2,TMEM201,TMEM86A,TOR1AIP2,TPCN2,TSHZ2,VASH1,VEGFA,VSTM4,WLS,XPO7,ZNF322,ZNF674
miR-1913 (and other miRNAs w/seed CUGCCCC)		mature microrna	Activated	2.032	bias	0.000263	AIFM2,ALKBH5,AMD1,ATAD2B,BMPR1B,BNC1,CADM1,CD247,CDH5,CDS2,CLN6,COL6A1,CRY2,CXCL12,CYGB,CYP19A1,DESI2,DUSP1,EXOSC2,EYA3,FADS1,FAM134A,FAM155B,FBXO41,GGA2,GPAM,GSE1,HRH1,HTRA3,ID4,INTS6,ITGA2,KIAA1324,L3MBTL3,LEP,LGI4,LRRC20,MAFF,METTL21A,MGMT,MSL3,MTSS1,MXD4,MYO19,NAA50,NAGPA,NGB,NMRAL1,NOL6,NSD1,OAF,PGF,PLBD2,PODNL1,PPP6R2,RXRA,SAR1B,SCAMP5,SHE,SLC25A22,SLC35F2,TEX2,TJP2,TMEM201,TMEM86A,TOR1A,TO…
NFATC2		transcription regulator		-0.597		0.000266	CCNA2,FAS,IFIT2,IFIT3,IFNG,IL10,MAF,NMI,PTPRK,RCAN1,RGS2,SLC3A2,SOCS1	149 (18)
miR-4290 (miRNAs w/seed GCCCUCC)		mature microrna		1.314	bias	0.00027	A1CF,ACSL1,ADGRF2,ALDOB,ANKRD46,AQP11,ARSA,BUB3,CDS2,CLK3,CLN6,COMMD9,CXCL12,CYTH2,DNAJB9,EDEM1,EHF,ENOPH1,FBXL20,FBXO41,GAS7,GLYR1,GYS1,HDAC4,HTRA3,HYAL2,ISOC1,LEP,LPCAT1,LRP1,MACF1,MAFF,MAT2A,MCUR1,MEF2C,MTAP,MXRA5,MYBPC1,NAT9,NCOA7,NFIB,NOL6,NOTCH4,NR2C1,NSD1,PPP1R13L,QSOX1,RGS12,RNLS,RXRA,SCAMP5,SESN1,SESN2,SLC13A4,SLC25A20,SLC6A3,SNAI1,TCEB3,TMEM248,TOR1A,TRH,TTLL12,USP37,VSTM4,WIPF2,ZNF395
miR-3928-3p (miRNAs w/seed GAGGAAC)		mature microrna		0.952	bias	0.000271	ADAR,AMD1,CAMK2N2,CAST,CD3E,ENSA,GRHL2,GSE1,HCFC2,HILPDA,IDE,KIAA1551,KIF1B,LPCAT1,MAB21L3,MAP4K4,NAA40,NAT9,NPHS2,NRCAM,PARP9,PCSK1,PSD3,S100B,TCF21,TMEM19,TNFSF13,USP37,WIPF2,ZNF630
propylthiouracil		chemical drug		0.792		0.000275	ART3,BTG2,DIO2,FADS1,GHRHR,GLUL,ITGA6,LHB,PCSK2,TRH,VLDLR	60 (4)
miR-3614-5p (miRNAs w/seed CACUUGG)		mature microrna		1.199	bias	0.00028	ADAR,ANKRD37,ANTXR2,ATP1B3,DCP1A,DESI2,EML4,FBXL20,GINS4,GLT8D1,HLCS,ITGA2,LTN1,MACF1,MAP3K9,MGMT,MSL1,NCAPG,NR1I2,ODF2L,PCP4L1,PECAM1,PENK,PRSS12,RCAN1,TCF21,TOR1A,TTC9,WWP1,ZFX
miR-4651 (and other miRNAs w/seed GGGGUGG)		mature microrna		1.563	bias	0.00028	A1CF,AAK1,ADAM19,ANTXR2,ANXA5,ATP2B2,BHLHE40,BTG2,CAMK2N2,CCL21,CD3E,CDS2,CEBPA,CNP,COL6A1,CYGB,CYTH2,DPF2,EIF4EBP1,EIF4G1,FAM155B,FAS,FASN,FXYD4,GAS7,GHRHR,GLRX,GLUL,GPAM,GPAT3,GPATCH4,GYS1,HLCS,IGSF1,INHA,IRF2BP1,ITGA6,KIAA1644,LRP1,LRRC8C,LRTOMT,MAF,MYOD1,NAA50,NCOA7,NR2F2,NSD1,NSFL1C,OXT,PALLD,PCP4L1,PFKFB3,PHF12,PIK3R2,PLBD2,PODNL1,POLR1D,POLR3A,PPRC1,PQLC1,PTOV1,PUS1,QSOX1,RBM25,RNF40,S1PR3…
miR-1248 (miRNAs w/seed CCUUCUU)		mature microrna		0.076	bias	0.000282	ADM,ANTXR2,BCLAF1,COL6A3,DNAJC3,EHF,FAM188A,GADD45A,GPATCH4,HBEGF,KDR,KLRC4-KLRK1/KLRK1,LGR4,MAP10,MS4A2,MTAP,NDUFA5,PHF12,PHLDB2,PTPRR,RRAGD,SOCS6,TXNDC15,TYMS,VGLL3,ZBTB7A,ZNF382,ZNF395
miR-764 (miRNAs w/seed CAGGUGC)		mature microrna	Activated	3.273	bias	0.000289	AMER3,ANKS3,ARID2,CLN6,CYTH2,DICER1,DMBT1,DRAM2,EXOSC2,FADS1,FBXL20,FLT1,GINS4,GPAM,GPX6,IFIT2,KCTD11,LYRM4,MAB21L3,MECR,METTL21A,MID1,NANP,NAT9,NNT,NR4A3,PDE4DIP,PHRF1,PNMA1,SAR1B,SNAPC5,SORBS2,SRGAP1,TMEM201,TPP1,TRRAP,TSHZ2,TTLL12,VSTM4,WDR33
miR-4761-3p (miRNAs w/seed AGGGCAU)		mature microrna	Activated	2.712	bias	0.0003	AK3,B3GALNT1,CD247,CD93,COL6A3,DIO2,DNAJC15,EDEM1,EGLN1,EIF2S1,FAM57A,FBXO41,FBXO9,GADD45A,GLUL,ITGA2,KIAA1324,LTN1,MAFF,MAP3K9,MAT2A,MAT2B,MEF2A,MTAP,NOL6,NT5DC1,PLEKHA8,SARAF,SHE,SLC35F2,SLC38A9,SMC4,SOCS4,SPTLC2,TSTD2,WDR33,WWP2
miR-3127-5p (miRNAs w/seed UCAGGGC)		mature microrna		1.445	bias	0.000302	ADAM19,AK3,ALKBH5,ARSA,CCDC3,COG8,COL6A1,DDX42,DENND4B,DNAJC3,EXOSC2,FAM122A,FBXO41,FCRL5,GAS1,GGA2,GINS4,HCFC2,HOXD8,KCNE3,KIAA1644,LEP,LFNG,LHB,LRRC20,LRRFIP1,MAFF,MECR,MEF2A,MID1,NCOA7,PATL1,PIK3C2B,RHPN2,S100PBP,SCARA5,SLC27A1,SLC2A1,SLC37A4,SORBS2,TCEB3,TPP1,TSPAN9,UBE2F,VSTM4,WDR33,WDR81,WIPF2,YLPM1
OXT	-5.24	other		0.565	bias	0.000303	FOS,MEF2C,PRKCZ,RCAN1,RGS2	193 (22)
S-adenosylmethionine		chemical - endogenous mammalian		-0.199		0.000304	FASN,FOS,GCLM,IL10,MAF,MAT2A	248 (20)
ENG		transmembrane receptor		-1.342		0.000304	CDH5,ITGA6,KDR,MYC,PECAM1,PLAU	209 (23)
PRMT5		enzyme		-1.516		0.000304	CEBPA,FASN,GAS1,IVL,LEP,MYC	174 (16)
methylnitronitrosoguanidine		chemical toxicant		1.224	bias	0.000308	CEBPA,FAS,GADD45A,PLAU	198 (20)
salmeterol		chemical drug		1.131		0.000308	DDIT4,IL10,RGS2,SLPI	199 (11)
ADAM15		peptidase		0.132		0.000308	FLT1,IFNG,KDR,VEGFA	125 (13)
GH1		growth factor		1.357		0.00031	ACSL1,ALB,CEBPA,DECR1,FASN,FGG,FOS,GADD45A,GHRHR,HBB,HOXA1,IGF1,IGF1R,MYC,SLC2A1,SOCS1	233 (24)
miR-3183 (and other miRNAs w/seed CCUCUCU)		mature microrna		1.674	bias	0.000311	ADAR,AIFM2,ANKRD44,ARID2,ARL4A,ARSA,ATAD2B,BTG2,CALML4,CRY2,DIO2,DTX3L,EIF4EBP1,FADS1,FLT1,FOS,GYS1,HLCS,ID4,IGF1,KCTD11,KIF1B,LOC102724159/PWP2,LPAR3,LRRFIP1,MAN1A1,MFSD6L,NAA50,NR2F2,ODF2L,PCP4L1,PGM3,PIK3C2B,PRELID2,RUNDC3A,RXRA,SLC2A3,SLC37A4,TP53RK,TSPAN9,WIPF2,XPO7,ZNF322,ZNF674,ZNHIT6
CD3		complex		-1.601		0.000314	ARHGDIB,CBL,CD2,CD247,CD3E,EWSR1,FAS,FOS,FYN,GAPDH,GYS1,HELLS,ID4,IFI35,IFNG,IGF1,IL10,LRP1,LTN1,MAF,MYC,NASP,PTP4A2,RNF128,RXRA,SLPI,SOCS1,SSB,STIM1,TNFSF10,TOP2A,TPST1,TSPAN9,VEGFA,ZFP36	182 (21)
miR-4448 (miRNAs w/seed GCUCCUU)		mature microrna		-0.353	bias	0.000317	ADGRF2,ANTXR2,ARID2,ARSA,CERCAM,CXADR,DNAJC3,DPF2,EGLN1,FADS1,FAF2,GPAT3,GPATCH4,GSE1,GTF2F2,ID4,IGSF1,ITGA6,KIF3A,L3MBTL3,NAGPA,NCAPG,NOL6,PEX12,PFKFB3,PPP1R3B,PTPRR,RALGDS,RRAGD,S100PBP,SLC1A1,TCEB3,TMEM248,VSTM4,ZCCHC10,ZNF280D,ZNF692
miR-329-3p (and other miRNAs w/seed ACACACC)		mature microrna		0.807	bias	0.000319	AAK1,ADAR,ALKBH5,ANK3,ANKRD44,APITD1/APITD1-CORT,ARL4A,ATP1B3,BHLHE40,BMPR1B,CDS2,CLN6,CRY2,EIF4G1,ENSA,EYA3,FPGT,GAS7,GPX6,KCTD11,KLF11,LYRM4,MAF,MEF2A,NDUFA5,NIP7,PCSK2,PDE4DIP,PTPRG,QSOX1,RHPN2,SOCS6,SORBS2,SPTLC2,SRGAP1,STAMBP,STARD8,STBD1,TMEM201,TSHZ2,USP37,WIPF2,ZCCHC10,ZER1,ZFX,ZMAT3
IRAK4		kinase		-0.152		0.000321	BTG2,FOS,IDE,IFNG,IL10,NOCT,PLSCR1,SOCS1,ZFP36	222 (22)
nitric oxide		chemical - endogenous mammalian		1.67		0.000328	BNIP3,CXCL12,FLT1,FOS,GADD45A,GCLM,IFNG,IL10,MYC,PECAM1,PGF,TNFSF13,VEGFA	229 (20)
STAT5B		transcription regulator		-0.954		0.000328	CIDEA,CRADD,FAS,FOS,GADD45A,IFNG,IGF1,LEP,LTB,MAF,SOCS1,TCAP,ZFP36	216 (18)
miR-3130-3p (miRNAs w/seed CUGCACC)		mature microrna		1.938	bias	0.00033	ADGRF2,ADM,AMOT,ANKRD10,ARSA,BUB3,CD93,CXADR,DIO2,DPT,FAM134A,FAM171B,FAM65B,FCRL5,ID4,INTS6,KIAA1644,KIF1B,LPCAT3,MAP10,MAP4K4,MYCBP,PLEKHA8,PNPLA3,POLR1D,PQLC1,PTPRG,RASSF1,S1PR5,SERPINB11,SHE,SLC2A3,SLC35F2,SPTLC2,STAMBP,STARD8,STBD1,TMEM165,TSPAN17,TXNDC15
aldosterone		chemical - endogenous mammalian		0.215		0.000334	ADM,EMB,FAM65B,FLT1,FOS,FXYD4,IGF1R,KDR,PGF,POU1F1,RGS2,WNK4	202 (20)
Ap1		complex		0.097	bias	0.000334	CCNA2,CXCL12,FOS,GSS,IFNG,IGF1,ITGA2,MYC,MYOD1,NOTCH4,PLAU,VEGFA	211 (23)
cisplatin		chemical drug		0.095		0.000335	ALB,ANPEP,ANXA5,BTG2,CP,DICER1,FAS,FASN,FLT1,FOS,FYN,GADD45A,GAS1,HYAL1,IFNG,KRT19,LAMC2,MYC,NMI,RRM2B,RXRA,SESN2,SLC2A1,SLC2A3,SMOX,TNFSF10,TRAPPC13,TYMS	251 (19)
miR-3605-5p (and other miRNAs w/seed GAGGAUG)		mature microrna		1.355	bias	0.000338	ADAMTS3,AK3,ALKBH5,ASB13,CAMK2N2,CD93,CYGB,CYP19A1,EHF,FADS1,FAM155B,FLRT2,GGA2,GINS4,HRH1,INIP,ITGA6,KDR,KIF1B,NOLC1,NSD1,PARP9,PDE4DIP,POLR3A,SLC16A3,SLC2A3,TMEM201,TOR1AIP2,TSHZ2,TTC9,XPO7,ZNF322
INSR		kinase		0		0.000341	ACSL1,ACSL5,ARL4A,CEBPA,COL6A3,DECR1,DUSP1,FASN,FOS,GADD45A,GAPDH,GAS1,HBEGF,HELLS,IFNG,IGF1,IGF1R,LEP,MYC,PHLDA2,SLC25A20,SLC2A1	246 (23)
miR-4540 (miRNAs w/seed UAGUCCU)		mature microrna		1.326	bias	0.000341	BMPR1B,CEP44,CRNKL1,EEF1E1,FADS6,FBXL20,FLRT2,GCLM,GGA2,GPAM,HDAC4,L3MBTL3,LEP,LRPPRC,METAP1,NNT,NT5DC1,ODF2L,PARP9,PTHLH,RRS1,SAMD8,SLC19A2,TARBP1,TEX2,VGLL3,WDR33
Esrra		transcription regulator		-1.744		0.000351	ACSL5,ALDOB,APOA4,DLAT,ENO2,GYS1,IFNG,NDUFA5,PYGM,SLC2A1
miR-192-5p (and other miRNAs w/seed UGACCUA)		mature microrna		0.493	bias	0.000353	AMER3,ANKRD44,ARL4C,B3GALNT1,CBL,CEP70,COMMD9,CRNKL1,CSTF1,DICER1,ENC1,HEATR5A,IGF1,LRRFIP1,MXRA5,MYF6,NAA50,PGM3,SARAF,SLC19A2,SRSF6,TCEB3,TSHZ2,TYMS,WWP2,ZFP1,ZMAT3
STAT5A		transcription regulator		-0.25		0.000353	CEBPA,FAS,FASN,FOS,GADD45A,IFNG,IGF1,LTB,MAF,MYC,S1PR5,SLC2A1,SOCS1,ZFP36	250 (23)
miR-619-3p (miRNAs w/seed ACCUGGA)		mature microrna	Activated	2.706	bias	0.000364	ACSBG1,AHCTF1,ANKRD44,CDH5,COA7,CSTF1,CXCL12,CYP1A1,DNAJC15,DTX3L,ENSA,FBXL20,FLT1,GLUL,HNMT,LEP,MECR,METAP1,MSL3,NCOA7,PAPOLA,PLLP,PTP4A2,QSOX1,RBL1,RHPN2,RNF128,SAR1B,SCARA5,SORBS2,SPTLC2,TCEB3,TMX4,TNFSF10,VWDE,WIPF2
CD36		transmembrane receptor		0.896		0.000372	APOA4,FASN,IFNG,IGF1R,IL10,LEP,LRP1	222 (22)
miR-3594-5p (and other miRNAs w/seed CCAGGGC)		mature microrna		0.834	bias	0.000374	AIFM2,ANKS3,AQP11,ARL4C,ARSA,BTG2,CALML4,CCL21,CD2,CDA,CDS2,CEBPA,CIDEA,CLDN2,COA7,COL6A1,DEGS2,DENND4B,DLAT,DPT,DTX3L,FAF2,FAM107B,FAM134A,FAM155B,FAM57A,GAS7,GYS1,HLCS,IFIT3,INTS6,INTS7,KHK,KIAA1324,KLF1,LPCAT1,LPGAT1,LRRC20,LRTOMT,MAB21L3,METRNL,MFSD6L,MXD4,NCOA7,NOL6,NR1I2,PECAM1,PGF,PIK3C2B,PIK3R2,PLBD2,PLOD1,QSOX1,RBFA,RGS12,RNF40,RXRA,S100PBP,SCAMP3,SHE,SLC11A2,SLC19A2,SLC25A22,SLC27A1,STA…
GnRH analog		biologic drug		-0.218		0.000386	ATRN,BHLHE40,BUB3,CCP110,COL6A1,CRADD,DUSP1,EIF4EBP1,ENSA,FAS,FBXO7,FLT1,FOS,GPSM2,HYAL2,IFNG,MGMT,NR1I2,PHLDA2,PPIG,SLC2A3,TFDP1	100 (7)
epigallocatechin-gallate		chemical drug		1.436		0.000386	CEBPA,DNMT1,FAS,FOS,IFNG,IGF1R,IL10,IVL,KDR,LEP,MYC,SNAI1,SOCS1,TAC1,TNFSF10	217 (19)
miR-186-5p (miRNAs w/seed AAAGAAU)		mature microrna		1.763	bias	0.000395	AK3,AKAP12,AMOT,ANK3,ANTXR2,BBIP1,CADM2,CAST,CDK5R1,CEP44,CXCL13,CXCL14,DCP1A,DDX42,DICER1,DNAJB9,DNAJC3,FAM193B,HNMT,IGF1,IGF1R,KIF3A,LPGAT1,MTF2,NASP,NFIB,NSD1,ODF2L,OSBPL8,PARP11,PCSK1,PEG3,PGM3,PSD3,RBM25,RRAGD,S100PBP,SAMD8,SLC11A2,SPTLC2,TMEM201,TOB1,USP37,VEGFA,VGLL3,ZNF395
prednisolone		chemical drug		0.62		0.000397	ARSA,BAG3,BNIP3,CDK5R1,CYGB,CYP1A1,DRAM2,DUSP1,EIF4G1,FAS,IFNG,IGF1,IL10,NFIL3,PFKP,SOCS1,TNFSF10	204 (19)
miR-3547 (and other miRNAs w/seed GAGCACC)		mature microrna		0.115	bias	0.0004	ACSL1,ANK3,ARID2,ASB13,ATP2B2,ATRN,BTG2,CDC23,CP,CYTH2,DTX4,FAS,FBXW4,FCER1A,FCRL5,HNMT,HR,KLF11,LFNG,LRRC8C,LRRFIP1,MAF,METAP1,NPC2,PDE4DIP,PTHLH,R3HDM4,RASSF1,RNF128,RNLS,SRGAP1,TCEB3,TJP2,TMEM86A,TNFSF10,VSTM4,WIPF2,ZCCHC10,ZFP36
miR-1976 (and other miRNAs w/seed CUCCUGC)		mature microrna		1.986	bias	0.000404	ABCB11,ANTXR2,CBL,CDC23,CEP70,CLN6,COA7,CRNKL1,CYFIP2,CYTH2,EGLN1,EMB,EXOSC2,FADS1,FAM134A,FAM155B,FAM65B,FAS,FBXO9,FUCA1,GCLM,GINS4,IFIT3,INIP,INTS7,KIAA1644,KLF1,LAMC2,LETM1,LUZP1,MAP3K9,METTL21A,MRI1,MTSS1,MYCBP,NAA40,NIP7,PLAU,PLLP,PNPLA3,PODNL1,PQLC1,PQLC2,PRELID2,QPCTL,QSOX1,RGS12,RRAGD,RXRA,S100PBP,SAMD8,SESN2,SMIM11A,STAR,TBC1D32,TMEM144,TMEM86A,TPCN2,TRAPPC13,TRUB2,WDR81
miR-3190-3p (and other miRNAs w/seed GUGGAAG)		mature microrna	Activated	2.268	bias	0.000406	ANK3,ANKRD10,BNC1,DBNDD1,DNAJC15,DTX4,ENO2,ENSA,FAF2,GLUL,HILPDA,HOXA1,HTR1D,IGF1,ITGA2,KIF1B,LRRFIP1,MXD4,MYO19,NR2C1,PCSK1,PPP1R3B,RASA1,RMI2,RUNDC3A,S100B,S1PR3,TEX2,TOR1A,TTC9,WWP1,ZNF630
phenylephrine		chemical drug		0.935		0.000409	CYP19A1,DIO2,DUSP1,E2F3,FOS,MYC,RCAN1,RGS2	157 (20)
corticosterone		chemical - endogenous mammalian		-0.203		0.000412	DDIT4,DIO2,FASN,FOS,FXYD4,GLUL,GPAM,IDE,LEP,LHB,TRH	223 (22)
SMAD7		transcription regulator		-1.342		0.000412	BMPR1B,CCNA2,COL6A1,COL6A3,FAS,GADD45A,HBEGF,IFNG,ITGA6,MYC,VEGFA	184 (23)
indomethacin		chemical drug		-1.635		0.000418	ACSL1,ALOX15,BTG2,CP,FASN,FGF18,FLT1,FOS,IFITM3,IGF1,IL10,LAMC2,MYC,NR1I2,OXT,STAR,VEGFA	231 (17)
FOLR1		transporter				0.000419	AK3,ARHGDIB,CELF2,CSTF1,GLRX,GPAM,SLC3A2,SNRPF,TAC1,TYMS
miR-4755-5p (and other miRNAs w/seed UUCCCUU)		mature microrna	Activated	3.052	bias	0.000423	A1CF,ABCB11,AMOT,AQP11,BBIP1,CCP110,CNP,COMMD9,CRYZL1,CXCL14,DDX42,DECR1,FAM171B,FGF18,FLRT2,FLT1,HSPH1,INTS6,ITGA2,KLF11,LFNG,MID1,MTCH2,NASP,NOLC1,NR2C1,PTPRR,RNLS,RRS1,SAR1B,SF3B1,SHE,SLC19A2,SLC1A1,SLC38A9,SS18,STEAP4,TPST1,ZCCHC10,ZDHHC14,ZNF280D,ZNF382
NRIP1		transcription regulator		-0.104		0.000426	AIFM2,CIDEA,FASN,NR2C1,PPP1R3B,SLC25A20,STAR	57 (7)
miR-4774-3p (miRNAs w/seed UUGCCUA)		mature microrna	Activated	3.452	bias	0.000426	ABHD5,ADAMTS3,AMER3,ATRN,CCP110,CCT6A,CEP44,E2F3,EGLN1,EIF2S1,FPGT,HRH1,IFNG,MAT2B,MTAP,PARP9,PDE4DIP,PECAM1,RBM25,RNF128,RRS1,S100PBP,SLC11A2,SRSF11,STAMBP,TRAPPC13
miR-4432 (miRNAs w/seed AAGACUC)		mature microrna		1.496	bias	0.000427	A1CF,ANK3,CDC27,CELF2,CEP44,ERO1A,FLT1,HEATR5A,HTR1D,INIP,KCTD8,LGMN,MAMDC2,NGB,NOCT,NR2F2,PENK,PGM3,RCAN3,RET,SLC38A9,TCEB3,ZMAT3
cytarabine		chemical drug		0.9		0.000429	FAS,GADD45A,GAPDH,SESN1,SESN2,TOP2A	175 (12)
miR-548s (miRNAs w/seed UGGCCAA)		mature microrna	Activated	2.049	bias	0.000431	A1CF,AAK1,AKAP12,AP1M1,AREL1,ARSA,ART3,BTG2,CDH5,CLDN2,CYTH2,DCP1A,DIO2,ENPP1,EWSR1,EYA3,FAM65B,GJA4,GLUL,GYS1,HCFC2,IDE,IGF1R,KIF3A,LRRC8C,LUZP1,NANP,NIP7,PHACTR1,PIK3R2,PIPOX,PPAN,PRELID2,RBL1,SLC6A3,SLCO2B1,TNFSF10,TOR1AIP2,TSHZ2,VSTM4,ZNF382
ONECUT1		transcription regulator				0.000434	ABCB11,AMBP,CLDN2,CRADD,CXCL13,CYGB,EHF,FAS,GSS,HSPH1,IRF6,LAMC2,NOLC1,NR1I2,OAZ2,PTPRR,TCEB3,TNFSF10,TRUB2
STAU1		transporter		0		0.000434	MEF2A,MEF2C,MYC,MYOD1
prazosin		chemical drug		0	bias	0.000434	DIO2,DUSP1,FOS,MYC	233 (24)
miR-4489 (miRNAs w/seed GGGGCUA)		mature microrna	Activated	4.188	bias	0.000443	ABI3,ADAM19,AMER3,BHLHE40,CEP44,CLN6,CNP,DBNDD1,DLAT,ENC1,FBXO41,FLT1,GAS7,GPAT3,HRH1,IGF1R,IGSF1,KIF1B,LAMC2,LFNG,LGMN,LPCAT1,LYRM4,MECR,MRI1,MTCH2,NCOA7,NFYC,NOL6,PDE4DIP,PLEKHA8,PNPLA3,RBL1,RNLS,RUNDC3A,SESN1,SLC11A2,SLC25A22,SNAI1,STAMBP,STARD10,TBC1D8,TMEM201,TMEM86A,TNFSF10,TRRAP,TTLL12,UBE2F,WWP2
bezafibrate		chemical drug		0.102		0.000456	ABCB11,ACSL1,ACSL5,BNIP3,FASN,HILPDA,LEP,MGMT,NPC2,PEX3	175 (19)
PTH		other		0.769		0.000457	ALOX15,ANK3,BHLHE40,CXCL12,DUSP1,FOS,ID4,IGF1,NFIL3,PHLDB2,PLAU,RGS2,TJP2	209 (18)
miR-3975 (miRNAs w/seed GAGGCUA)		mature microrna	Activated	2.664	bias	0.000472	ABHD17C,APOA4,AQP11,ATP1B3,CXADR,CYTH2,DCP1A,DPF2,ENSA,FAM122A,FAM57A,FLT1,HOXD8,ITGB8,MAP10,MAT2A,MYCBP,MYF6,NNT,PACSIN2,PARP11,PEX12,PIGC,PRSS12,PTHLH,SORBS2,SRSF6,TMEM19,TMEM86A,TNFSF10,TTLL12,WLS
NFIL3	2.63	transcription regulator		0		0.000477	FAS,GADD45A,IFNG,IL10,TNFSF10	224 (19)
AMH		growth factor		-0.832		0.000477	CYP19A1,INHA,LHB,RBL1,STAR	105 (7)
miR-3678-3p (miRNAs w/seed UGCAGAG)		mature microrna		0.976	bias	0.000477	AAK1,ANKRD10,ANKRD46,BMPR1B,BNIP3,BTG2,CCP110,CCT6A,CSTF1,DCP1A,EHF,GLDN,GPATCH2,GRHL2,HLCS,ID4,IGF1R,KCNE3,LAMC2,MAFF,NFIA,NRCAM,NSFL1C,OSBPL10,PEG3,PLEKHA8,POLR1D,SLC19A2,SOCS4,TCF21,TIA1,TOR1AIP2,WDR33,WWP2,ZFP1,ZMAT3,ZNHIT6
CNTF		cytokine		0.726		0.000478	FASN,FOS,LEP,MYOD1,NR2C1,PENK,SOCS1,TAC1,ZFP36	228 (25)
RET	-2.81	kinase		-0.555		0.000478	CXCL12,FOS,IFNG,IL10,ITGA6,MAF,PLAU,POU1F1,SLC6A3	198 (19)
SERCA		group				0.000478	BTG2,MYC,ZFP36	126 (7)
CCAR1		transcription regulator				0.000478	CEBPA,RGS2,SPHK1
MPL		transmembrane receptor				0.000478	FOS,MYC,SLC2A1	217 (20)
miR-659-3p (miRNAs w/seed UUGGUUC)		mature microrna	Activated	2.267	bias	0.000479	ACSL1,ANKRD44,ATAD2B,BBIP1,BMPR1B,DUSP1,EBNA1BP2,EYA3,FAM107B,FGF18,FLT1,GADD45A,IFIT2,LRIG3,NCAPG,NSFL1C,ODF2L,PCSK1,PIGC,PLEKHA8,SLCO2B1,SPHK1,STIM1,TOR1AIP2,ZNHIT6
miR-663b (miRNAs w/seed GUGGCCC)		mature microrna		1.173	bias	0.000482	ADGRF2,AP1M1,ASB13,CCT6A,CD2,CLDN2,CNP,COMMD9,CRY2,CXCL12,CYFIP2,CYP1A1,DBNDD1,DIO2,DPF2,DRAM2,EWSR1,FADS6,FBXO41,GAS7,GHRHR,GLDN,GLYR1,GRHL2,HILPDA,HOXD3,KLRC4-KLRK1/KLRK1,LGI4,LRP1,MAP3K9,MCAT,MGMT,MSC,MSL3,MXD4,MYO19,NGB,NOTCH4,PLEKHA8,PODNL1,PPP1R13L,PQLC2,PRELID2,RCAN1,RXRA,S1PR3,SCARA5,SLC16A3,SLC27A1,SLC2A1,SLC2A3,TP53RK,TSPAN9,USP37,VASH1,VSTM4,ZFYVE1
ERK1/2		group		1.452		0.000484	CDC42EP5,CEBPA,CYP19A1,DUSP1,FLT1,FOS,HBEGF,IFNG,IL10,ITGA2,MYC,NR4A3,PLAU,PRKCZ,SNAI1,STAR,TAC1,VEGFA	240 (19)
fish oils		chemical drug		-1		0.000486	ACSL1,CEBPA,CYP1A1,FASN,IL10,NR1I2,RXRA	161 (7)
miR-4677-5p (miRNAs w/seed UGUUCUU)		mature microrna	Activated	2.886	bias	0.000501	ANKS3,CADM1,CAST,COA7,CXADR,CYP1A1,DNAJC21,EIF2S1,FAM122A,GINS4,GTF2F2,HEATR5A,HELLS,KDR,LAMC2,LGR4,LPGAT1,MAT2B,MEF2A,NR4A3,ODF2L,PBRM1,PLSCR1,PTP4A2,SAMD8,SLC11A2,SOCS6,ZNF280D
miR-642a-5p (miRNAs w/seed UCCCUCU)		mature microrna		1.026	bias	0.000501	AAK1,ACSL1,AMD1,ATP2B2,CD93,CNP,COMMD9,CP,CRY2,CYP19A1,FADS1,FADS6,FAF2,FBXO9,FCGR1A,GAS1,GAS7,HCFC2,HOXD8,HTR1D,IVL,KCNE3,KCTD8,KIAA1324,LRPPRC,LRRC8C,LTN1,LUZP1,MACF1,MSL3,NAA40,NCK2,NOLC1,NR4A3,NUP54,PGM3,PRKCZ,PTP4A2,PTPRG,RCAN1,S1PR3,S1PR5,SCARA5,SRSF6,SS18,TCEB3,TCF19,TMEM86A,TNFSF13,TOB1,ZNF395
DETA-NONOate		chemical reagent		1.546		0.000505	CA9,DUSP1,FAS,FOS,IFNG,STAR	144 (18)
CD4		transmembrane receptor		1.095		0.000505	CXCL13,FAS,IFNG,IL10,TAC1,TNFSF10	108 (17)
ethylene glycol tetraacetic acid		chemical reagent		0		0.000505	FOS,IFNG,IL10,LHB,RCAN1,STAR	228 (22)
mir-21		microrna		1.608		0.000508	ALOX15,BTG2,CACYBP,CCNA2,CDH5,FCGR1A,IFI16,IFNG,LTB,PECAM1,PIP4K2A,SESN1,SLPI,SOCS6,TCF21,TOP2A,TP53RK,VRK1	131 (10)
miR-3936 (miRNAs w/seed AAGGGGU)		mature microrna		1.755	bias	0.000508	AAK1,ARSA,ATAD2B,CACYBP,CDC27,CDH3,CDS2,DDX42,EEF1E1,EIF2S1,EWSR1,FAM107B,FAM122A,FAM188A,FBXO9,FBXW4,FXYD6,GAPDH,GPATCH4,HTR1D,LEP,LPCAT1,LRTOMT,MID1,NR4A3,NSD1,PLEKHA8,PRSS12,RASA1,RRAGC,SLC1A1,SPTLC2,STAMBP,TMEM165,VSTM4
miR-4423-5p (miRNAs w/seed GUUGCCU)		mature microrna		1.898	bias	0.000514	ABHD5,ANKRD10,COA7,HEATR1,HLCS,HRH1,ID4,IGF1R,ITIH3,KIAA1324,LRRFIP1,LRTOMT,MAB21L3,MAP3K9,MECR,MEF2C,MTSS1,MYCBP,NR2F2,PODNL1,PSD3,ROCK2,SRGAP1,SRSF11,STAMBP,STARD8,TCEA3,TMCC3,TMEM144,ZBTB7A
FOXO1		transcription regulator		1.145		0.00052	ACSL5,AIFM2,ALDOB,CCNA2,CIDEA,DDIT4,EIF4EBP1,FAS,FASN,FGF18,FOS,GADD45A,GPAM,IFNG,IGF1,LEP,LHB,NCAPG,NEK2,PLSCR1,TNFSF10	188 (22)
miR-3605-3p (miRNAs w/seed CUCCGUG)		mature microrna		0.485	bias	0.000523	AKAP12,AMER3,BMPR1B,CAMK2N2,CNP,CXCL12,DBNDD1,DEGS2,GINS4,GNA11,GRHL2,KIF1B,LETM1,MSC,SDCBP2,STBD1,TSPAN9,UBE2F,ZER1,ZNF395
PARP1		enzyme		-0.493		0.000525	CXCL12,FASN,FOS,IFNG,IGF1,IL10,MYC,SNAI1,SOCS1	227 (20)
staurosporine		chemical - kinase inhibitor		-0.574		0.000525	CYP1A1,FAS,FOS,IFIT2,IGF1,IGF1R,PLAU,STAR,VEGFA	233 (23)
miR-3685 (miRNAs w/seed UUCCUAC)		mature microrna		1.166	bias	0.000532	ADGRF2,ANKRD46,BNC1,CADM2,CCT6A,CEP70,COMMD9,DDX42,ENSA,FPGT,GPSM2,GTF2F2,IGF1,NANP,NEK2,OSBPL10,PIP4K2A,PLEKHA8,POLR1D,PTHLH,RCAN1,RET,S1PR5,SARAF,SRSF11,TMEM19,TOR1AIP2
miR-3151-5p (and other miRNAs w/seed GUGGGGC)		mature microrna	Activated	2.907	bias	0.000536	AAK1,ABHD5,ABI3,CADM1,CALML4,CDA,CYFIP2,CYTH2,DEGS2,ENC1,ENSA,FADS6,FAF2,FAM134A,FAM155B,FAM193B,FAM65B,FBXO41,FBXW4,FCRL5,FXYD4,FYN,GLDN,GSS,HRH1,KHK,LFNG,LRTOMT,LUZP1,LYRM4,MAF,MAP3K9,MEF2A,MS4A2,MTAP,MTCH2,MYOD1,NCK2,NFIB,NSFL1C,NT5DC1,PARP11,PCP4L1,PFKP,PIK3R2,PNPLA3,PODNL1,POLR3A,PPP1R13L,PPP1R3B,R3HDM4,RNF40,RUNDC3A,SESN2,SHE,SLC6A3,SMPD4,SNAI1,STEAP4,STIM1,TCEB3,TMCC3,TMEM201,TRH,TSPAN17,T…
miR-532-3p (miRNAs w/seed CUCCCAC)		mature microrna	Activated	2.087	bias	0.000536	AIFM2,APOA4,ARSA,BRF2,BTG2,CBL,CEBPA,CLDN2,CXCL14,CYTH2,DNAJC15,DPF2,DTX3L,DTX4,ENSA,EXOSC2,FADS1,FAM65B,ID4,KCNE3,KIAA1644,LRRFIP1,LTN1,LYRM4,MAP4K4,MTAP,MTCH2,MXD4,NAA40,NAT9,NELFA,NGB,NOL6,NRCAM,NSFL1C,NUP54,ODF2L,PDE4DIP,PGM3,PTPRK,RCAN1,S100PBP,S1PR5,SLC27A1,SLC2A3,SLC6A3,TCEA3,THOC2,UBTF,WDR70,WIPF2,ZNF322
lovastatin		chemical drug		1.06		0.00054	ALB,CCNA2,ENC1,HELLS,IFNG,IL10,LEP,MYC,PTHLH,RBL1	215 (21)
miR-193a-5p (miRNAs w/seed GGGUCUU)		mature microrna		1.991	bias	0.00054	ABHD5,AMD1,ANPEP,CD247,CDC23,CYGB,CYP19A1,CYP1A1,CYTH2,DIO2,DTX3L,EIF2S1,ENTPD5,FADS1,FGG,GAS7,IL10,LEP,LRPPRC,MECR,MSL1,MYOD1,NSFL1C,NT5DC1,PHF12,PIP4K2A,PODNL1,S100PBP,TMEM86A,UBTF,ZNHIT6
miR-485-5p (and other miRNAs w/seed GAGGCUG)		mature microrna	Activated	2.243	bias	0.000545	AIFM2,AKAP12,ALOX15,AP1M1,ARSA,ATRN,BTG2,CADM2,CAMK2N2,CCL21,CD3E,CRY2,CXADR,CXCL14,CYTH2,DCP1A,DPF2,DROSHA,DTX3L,FAM134A,FAM162B,FAM188A,FAM193B,FAM57A,FASN,FCRL5,GINS4,GLUL,HDAC4,ITIH3,KIAA1324,KIAA1644,LETM1,LRTOMT,MAN1A1,MAP10,MED15,MOAP1,NEK2,NNT,OSBPL10,PARP11,PEX12,PLEKHA8,PLOD1,PQLC1,PRSS12,PTOV1,RHPN2,RNLS,SLC11A2,SLC1A1,SLC27A1,STARD10,TMEM19,TMEM201,TMEM86A,TMTC4,TOP2A,TOR1AIP2,TSPAN9,…
miR-4670-3p (miRNAs w/seed GAAGUUA)		mature microrna	Activated	3.598	bias	0.000546	ABCB11,ACSL1,ADM,ANK3,AQP11,DUSP1,HNMT,IGSF1,KIF3A,MRPL32,MS4A2,NASP,NR2C1,OSBPL8,PLEKHA8,PTPRG,STAR,TMEM144,VGLL3,YLPM1
miR-3145-5p (miRNAs w/seed ACUCCAA)		mature microrna	Activated	3.094	bias	0.000547	ADAR,ANKRD10,ANKRD44,BBIP1,CEP44,CYYR1,DPF2,ENPP1,ENSA,FBXO9,HSPA4L,IFIT2,IRF6,LRPPRC,MTF2,NAA50,NR2F2,PENK,PIP4K2A,PTP4A2,RNLS,SLC1A1,SRGAP1,TIPIN,TPCN2,USP37,VASH1,VRK1,VWDE,ZNHIT6
miR-1343-5p (and other miRNAs w/seed GGGGAGC)		mature microrna		1.546	bias	0.000554	ALDOB,AREL1,BHLHE40,BTG2,BUB3,CAMK2N2,CAPG,CCDC3,CCL21,CD93,CDH5,CDS2,CLDN2,CYGB,DBNDD1,DENND4B,DIO2,DLX2,DPF2,DTX4,EMILIN1,ENC1,ENO2,FAM155B,FAM193B,FBXL20,FBXO41,FCGR1A,FYN,GAS7,GLDN,HTRA3,IFIT2,IGF1R,KIAA1324,LFNG,MAFF,METTL21A,MSC,MXD4,NAA40,NFYC,NGB,OAF,PARP9,PIK3R2,PKIG,PLAU,POLR1D,POLR3A,PQLC2,RCAN3,RXRA,SCARA5,SESN2,SLC2A1,STARD8,STIM1,TCEB3,TNFSF13,TRH,TRIM3,TTC9,UBTF,URM1,VASH1,VEGFA,ZB…
miR-548ag (and other miRNAs w/seed AAGGUAA)		mature microrna		1.67	bias	0.000563	ACTL6A,CACYBP,CDC27,CDS2,CELF2,CEP44,CRNKL1,CSTF1,DICER1,ENSA,GSE1,HEATR5A,KATNAL1,KIAA1324,MACF1,MYCBP,NAA50,NEK2,PEG3,TMEM165,TMTC4,TRRAP,UBE2F,WDR33,ZFP36,ZFX
IL1		group		0.172		0.000564	ALB,BHLHE40,CP,CYP1A1,DUSP1,FAS,FOS,IFNG,IGF1,IGF1R,IL10,LEP,LRP1,MYC,NR1I2,RXRA,SLC2A1,SLC2A3,TAC1,TNFSF10,VEGFA	241 (21)
miR-374b-5p (and other miRNAs w/seed UAUAAUA)		mature microrna		1.564	bias	0.000567	AMD1,ANK3,ANTXR2,ARID2,ATP2B2,BHLHE40,CADM2,CBL,CDA,CEBPA,CELF2,CXADR,EIF4G1,ENSA,FAF2,FAM65B,FGF18,FLT1,GADD45A,GAS7,HNMT,HR,HSPA4,ID4,IL10,METRNL,METTL21A,MID1,NFIA,NFIB,NR2F2,NR4A3,PHRF1,SOCS4,SRGAP1,TFDP1,VEGFA,ZER1
cocaine		chemical drug		1.541		0.000572	BHLHE40,DUSP1,ENO2,FOS,GADD45A,HSPA4,LAMC2,NR4A3,OXT,PPRC1,SLC6A3,TAC1,TRH,VEGFA	229 (21)
IL10	3.26	cytokine		0.417		0.000575	ADM,CXCL12,CXCL13,DUSP1,EHF,FAS,FCGR1A,FLRT2,FOS,IFIT2,IFNG,IL10,KLRC4-KLRK1/KLRK1,MAF,MS4A2,NR4A3,S100B,SOCS1,TNFRSF17,TNFSF10,VEGFA,ZFP36	216 (17)
miR-6808-5p (and other miRNAs w/seed AGGCAGG)		mature microrna		0.482	bias	0.000575	ADAM19,ARSA,ATRN,BBIP1,BTG2,CADM2,CBL,CYTH2,FAM134A,FAM155B,FAM162B,FBXL20,FLT1,GGA2,GINS4,GYS1,HCFC2,HEATR1,HRH1,IGF1,IKBKG,KIF1B,LPCAT3,LRIG3,LRTOMT,MAB21L3,MRI1,MRPS23,MS4A2,NELFA,NR1I2,NR4A3,PEX12,PFKFB3,PPP1R13L,PTP4A2,QPCTL,QSOX1,RBL1,RNF40,RXRA,SAR1B,SCAMP5,SLC11A2,SLC37A4,SMOX,SRSF6,TJP2,TMEM201,TPCN2,TPP1,TSPAN17,TSPAN9,UBE2F,XPO7,ZFYVE1,ZMAT3
potassium chloride		chemical drug		1.402		0.000577	ATP2B2,BTG2,CIDEA,CRADD,FOS,LHB,MEF2C,MYC,NR4A3	217 (21)
ATF2		transcription regulator		0.492	bias	0.000577	CCNA2,DUSP1,FOS,GADD45A,IFNG,IL10,ITGB8,PENK,PLAU	227 (17)
miR-290b-3p (and other miRNAs w/seed AGUGCCC)		mature microrna		1.339	bias	0.000577	AIFM2,ANTXR2,BTG2,CDC23,CDK5R1,CLDN2,CLEC14A,CXADR,EYA3,FBXL20,FBXO41,GAS1,GGA2,GPR39,HR,HRH1,KIF1B,MXD4,NANP,NAT9,ODF2L,PECAM1,PTP4A2,PTPRG,RASSF1,RBL1,S100B,SESN2,SLC27A1,SLC37A4,SS18,STARD8,STIM1,TBC1D8,TCAP,TOB1,TSPAN17,UBTF,WDR33,WDR81
miR-4755-3p (miRNAs w/seed GCCAGGC)		mature microrna		1.014	bias	0.000579	AAK1,AIFM2,ANPEP,ANXA5,BBIP1,CAMK2N2,CCDC3,CDS2,CEBPA,CERCAM,COA7,DEGS2,DNAJC3,DPT,DTX4,ENO2,ENPP1,EYA3,FAAP24,FADS6,FAM134A,FBXL20,FBXO41,FPGT,GCLM,GLUL,GLYR1,GPR39,GYS1,HDAC4,HTR1D,ID4,IGSF1,INIP,KCTD11,KIAA1324,KIF1B,KIF3A,LAMC2,LETM1,LPCAT1,LRTOMT,MAFF,MCUR1,MED15,MEF2A,MRI1,MXD4,NAA40,NAA50,NFIA,NSFL1C,PCSK2,PEX3,PFKFB3,PIPOX,PLLP,PODNL1,POLR1D,PPP6R2,PQLC2,PRELID2,QSOX1,RGS12,RHPN2,RXRA,S1P…
miR-4446-5p (miRNAs w/seed UUUCCCU)		mature microrna	Activated	3.108	bias	0.00058	ABCB11,ACSL5,BBIP1,BUB3,CELF2,CEP44,CLEC14A,COMMD9,CXCL14,CYP1A1,DDX42,FCGR1A,GCLM,HLCS,HSPH1,INTS6,ITGA2,KLF11,LFNG,LRPPRC,MID1,MTAP,MTCH2,NCAPG,NFIB,NR2C1,NUP54,PTPRR,PXK,RNLS,RRS1,SAR1B,SHE,SKP2,SLC19A2,SLCO2B1,VGLL3,ZDHHC14,ZFX,ZNF280D,ZNF382,ZNF674
miR-4459 (miRNAs w/seed CAGGAGG)		mature microrna	Activated	2.471	bias	0.000584	ACSL5,ADAM19,ADM,AKAP12,ALKBH5,ALOX15,ATP2B2,BTG2,CCDC3,CD2,CEBPA,CNP,CXCL12,DBNDD1,DPF2,DPT,DTX3L,ENO2,ENPP1,ENSA,EYA3,FBXL20,FBXO41,GLDN,GPX6,GSS,HN1,HR,IGF1,IGF1R,IRF2BP1,LETM1,LFNG,LPCAT1,LPCAT3,LRTOMT,MCAT,NSFL1C,PHF12,PHYHD1,PLBD2,RASSF1,RCAN3,S100PBP,SHE,SIMC1,SLC11A2,SLC27A1,SLC35F2,SNAI1,SS18,TIA1,TMEM19,TMEM86A,TPST1,TSHZ2,TTC9,URM1,WLS,ZFYVE1
TRIM24		transcription regulator		0	bias	0.000586	EMB,FAM26F,GLUL,IFI35,IFIT2,IFIT3,NMI,PTHLH,SOCS1,VEGFA	110 (7)
Smad		complex		1.964	bias	0.000588	EGLN1,IFNG,MYC,PTHLH,VEGFA	81 (7)
targinine		chemical drug		0.302		0.000588	FAS,FOS,IFNG,IL10,VEGFA	188 (20)
miR-1260a (and other miRNAs w/seed UCCCACC)		mature microrna		1.252	bias	0.000589	AIFM2,AMOT,ANKS3,ARSA,ATAD2B,ATF6B,ATRN,CCNA2,CXCL12,CYTH2,DNAJC3,DPT,ENSA,FAM65B,FLT1,HILPDA,HLCS,KATNAL1,KDR,KIF1B,KIF3A,LAMC2,LFNG,LGMN,LRRC20,MAFF,MEF2C,MSL1,NGB,NSFL1C,PCP4L1,PEG3,PGF,PLEKHA8,PPP1R13L,PTP4A2,PTPRK,QSOX1,RET,RNF40,RNLS,RXRA,SHE,SLC11A2,SLC16A3,SLC27A1,SLC37A4,TCEA3,TCF19,TCF21,TJP2,TOR1AIP2,TP53RK,TRH,TSPAN17,TSPAN9,UBTF,VASH1,WDR81,WIPF2,XPO7
delta-9-tetrahydrocannabinol		chemical drug		1.199		0.000591	CEBPA,CRADD,FOS,IFNG,PECAM1,TNFSF10	221 (21)
RPS6KA5		kinase		1.238		0.000594	DUSP1,FOS,IL10,MYC	201 (22)
SOCS2		other		1.103		0.000594	FASN,IFNG,IGF1,MYOD1	152 (16)
HIRA		transcription regulator		0		0.000594	FLT1,KLF1,PGF,SPHK1
HTATIP2		transcription regulator				0.000594	FOS,MYC,SNAI1,VEGFA	178 (14)
myricetin		chemical - endogenous non-mammalian				0.000594	CYP1A1,EGLN1,IL10,MYC	203 (19)
miR-320b (and other miRNAs w/seed AAAGCUG)		mature microrna		1.803	bias	0.000618	ACTL6A,ALKBH5,ARL4A,ATAD2B,BNC1,BNIP3,CBL,CXCL14,DCP1A,DDX42,DESI2,DICER1,DNAJC3,E2F3,EDEM1,EMB,EYA3,FAAP24,FAM134A,FAM155B,FAM188A,HDAC4,HSPA4,ID4,IDE,IFIT2,IGF1,IGF1R,IRF6,KIAA1324,LRRFIP1,MID1,MSL1,MTAP,MTSS1,NAA40,NFIA,NIP7,PCSK1,RASA1,RXRA,SESN2,SORBS2,SPTLC2,TMEM144,TOR1AIP2,VGLL3,VLDLR,VSTM4,WLS,ZMAT3
methotrexate		chemical drug		0.336		0.00062	ALB,AMD1,CCL21,CLDN2,CXCL12,CYP19A1,DLAT,DUSP1,FADS1,FAS,FASN,GPAM,IFNG,IVL,MECR,MYC	217 (21)
miR-1301-3p (and other miRNAs w/seed UGCAGCU)		mature microrna	Activated	4.119	bias	0.000622	ALDOB,AMER3,AMOT,ANXA5,ATP1B3,CACYBP,CCT6A,CD3E,CD93,DPF2,DROSHA,EDEM1,EML4,ENC1,ENPP1,EWSR1,EYA3,FAM155B,FLT1,HEATR1,IDE,IRF6,KHK,MAP4K4,MECR,MTF2,NFIB,NFYC,PPP6R2,RNF40,RNLS,S100PBP,SRSF11,STEAP4,TCF19,TCF21,TEX2,TMEM45A,TSTD2,TTC9,TTLL12,VASH1,VGLL3
miR-204-3p (and other miRNAs w/seed CUGGGAA)		mature microrna		0.579	bias	0.000623	AAK1,ANK3,AP1M1,ARL4C,BMPR1B,BNC1,CBL,CDC23,CDH3,COL6A3,COMMD9,CRY2,CXCL12,CYP19A1,DDX42,EMB,FBXW4,FCRL5,GAS7,GLT8D1,GPAT3,GPATCH4,HOXD3,ITGB8,KATNAL1,KCNE3,KIF1B,KLF1,LEP,MAT2A,METAP1,METTL21A,PCSK1,PIK3C2B,PIP4K2A,PKIG,RBM25,RCAN1,SLCO2B1,STEAP4,TAC4,UBTF,VSTM4,ZFYVE1,ZMAT3,ZNF630
miR-3659 (miRNAs w/seed GAGUGUU)		mature microrna	Activated	2.584	bias	0.000625	AHCTF1,ATRN,BBIP1,CACYBP,CALML4,CYP19A1,FAM57A,GRHL2,HR,INTS7,IRAK1BP1,LAMC2,LRRFIP1,MID1,MS4A2,NSD1,PHLDB2,PTHLH,TOR1A,TSTD2,VGLL3,XPO7,YLPM1
L-glutamic acid		chemical - endogenous mammalian		0.776		0.000636	BAG3,CBL,FADS1,FASN,FOS,LEP,NFIL3,ROCK2,SLC1A1,SLC27A1	186 (20)
miR-194-5p (miRNAs w/seed GUAACAG)		mature microrna	Activated	2.155	bias	0.000637	ARID2,BCLAF1,BMPR1B,BNC1,CADM1,CEP44,COMMD9,E2F3,FLRT2,GRHL2,HBEGF,ID4,IGF1R,IL10,INTS10,KCTD8,LRRFIP1,MAMDC2,MAP4K4,MEF2C,NAA50,NANP,NNT,NR2F2,NSD1,PARP11,PGM3,PTPRK,RNLS,RRAGD,SAMD8,SRGAP1,SS18,TRAPPC13,WDR33,WWP1,ZNF395
AR		ligand-dependent nuclear receptor		-1.18		0.000637	ADGRA3,ADM,AK3,AMD1,CAST,CXCL12,EMB,HSPH1,IGF1,IGF1R,INHA,ITGA2,MEF2C,MYOD1,PENK,PLAU,S1PR3,SLC2A3,SNAI1,STAR,TCF19	209 (22)
PAX3		transcription regulator				0.000638	ARHGDIB,CDH3,DLX2,EIF2S1,ID4,MYOD1,NPC2,PCSK2,PGF,PPP1R7,PTHLH,RBM25,RET,TIA1,TJP2
miR-4672 (miRNAs w/seed UACACAG)		mature microrna		1.956	bias	0.000638	ARID2,ARL4A,ARL4C,CADM1,CEP70,DTX3L,EML4,FAM162B,FAM188A,FCGR1A,GLRX,GLUL,GSE1,HDAC4,IGF1R,IGSF1,INTS10,MAP10,MAP4K4,MRPS23,NFIL3,NR2F2,PEG3,PEX12,PFKFB3,PHF12,PNMA1,PRMT9,RMI2,RNF128,ROCK2,RRM2B,SESN1,SOCS4,SOCS6,SRSF6,STAMBP,TMEM19,WDR26,ZMAT3,ZNF674
STAT1		transcription regulator		-0.909		0.00064	ALOX15,FAM26F,FAS,FCGR1A,FOS,IFI16,IFI35,IFIT2,IFIT3,IFITM3,IFNG,IGF1,IGF1R,IL10,MYC,PHACTR1,SOCS1,TNFSF10	205 (17)
miR-33-5p (and other miRNAs w/seed UGCAUUG)		mature microrna		1.602	bias	0.000644	A1CF,ADAMTS3,AKAP12,ANK3,ANKRD44,CACYBP,CADM2,CALML4,CDK5R1,CELF2,DCP1A,ENC1,GAS1,GRHL2,GSE1,KIF1B,MAP4K4,METRNL,METTL21A,NCOA7,NFIA,NFYC,NPHS2,PGM3,PHF12,PLEKHA8,PNMA1,RCAN1,RMI2,RNF128,SRGAP1,TMEM86A,TRAPPC13,TSHZ2,TSPAN9,WIPF2
miR-4704-3p (miRNAs w/seed CAGUCAC)		mature microrna		1.979	bias	0.000661	AAK1,ABHD5,ATRN,BCLAF1,BUB3,CDH3,COG8,DPF2,DROSHA,EGLN1,EYA3,FBXL20,HEATR1,IFNG,INIP,LEP,LPAR6,LRRFIP1,MEF2A,MXRA5,NOLC1,NPHS2,NRCAM,PARP9,PGM3,PLLP,RRS1,RXRA,SAMD8,STEAP4,TCF19,TMEM201,TOR1AIP2,VGLL3,WDR33,XPO7
miR-4723-5p (and other miRNAs w/seed GGGGGAG)		mature microrna		1.846	bias	0.000667	A1CF,ACSL5,AK3,AMD1,BCLAF1,BTG2,CADM2,CAST,CD3E,CD93,CELF2,CERCAM,CLDN2,CSTF1,CXADR,CXCL12,CYFIP2,CYTH2,DCP1A,DESI2,DIO2,DLX2,DMBT1,EIF4EBP1,EMILIN1,ENPP1,EYA3,FAM155B,FBXL20,FGF18,GAS7,GLDN,GLYR1,GRHL2,HR,IGF1,IGSF1,KIAA1644,KIF1B,LEP,LRRC8C,LRTOMT,MAFF,MAP3K9,MCAT,METAP1,MID1,MTAP,MTCH2,MYOD1,NAA50,NOTCH4,NSD1,PACSIN2,PARP9,PCSK2,PIK3R2,PIPOX,PLAU,PLBD2,PNMA1,PTHLH,PTPRR,R3HDM4,RNLS,RUNDC3A,SAM…
ETS1		transcription regulator		-0.923		0.000667	ANPEP,CDH5,FLT1,IFNG,IL10,LTB,MYC,NFIL3,PLAU,PTHLH,SNAI1,TYMS,VEGFA	231 (24)
fulvestrant		chemical drug		0.799		0.000672	CAST,CYP19A1,EWSR1,FOS,GADD45A,IGF1,IGF1R,RBL1,ROCK2,SKP2,STAR,ZMAT3	198 (19)
miR-4730 (miRNAs w/seed UGGCGGA)		mature microrna		1.396	bias	0.000674	ACSBG1,ADAR,AK3,AMER3,CEBPA,GYS1,IFI35,KIAA1324,KLF1,MRI1,PHRF1,POLR1D,POLR3A,PRELID2,QPCTL,RET,SLC11A2,SLC13A4,SMPD4,XPO7
miR-596 (miRNAs w/seed AGCCUGC)		mature microrna	Activated	2.099	bias	0.000685	ADGRF2,BCLAF1,BTG2,CELF2,COMMD9,CXCL13,CYP1A1,DPT,E2F3,EYA3,FADS6,FAM107B,FBXO41,FLT1,FXYD6,HNMT,LETM1,LMCD1,LRRC20,LRTOMT,LYRM4,NFYC,NIP7,NOTCH4,NSFL1C,NT5DC1,PECAM1,PEG3,PFKFB3,PGM3,PITRM1,PTPRG,RUNDC3A,SDCBP2,SLC11A2,SLC35F2,SLPI,SMPD4,TCF21,ZCCHC10
TO-901317		chemical reagent		-1.402		0.000686	ACSL1,ACSL5,ADM,ALB,CIDEA,FADS1,FASN,GPAM,IGF1,ITGA6,PFKFB3,PFKP,PNPLA3,SLC37A4,STAR,VEGFA	188 (19)
tert-butyl-hydroquinone		chemical reagent		0.973		0.000688	FOS,GCLM,GSS,IL10,MAF,SESN2	219 (21)
miR-1257 (miRNAs w/seed GUGAAUG)		mature microrna		1.283	bias	0.000698	A1CF,ALDOB,CADM2,CLDN2,CRNKL1,DCP1A,EXOSC2,IGF1R,MAF,MRPS23,MSL3,MYF6,NCAPG,ODF2L,PLSCR1,RRAGD,SESN1,STAR,TMEM248,TOR1AIP2,USP37,VWDE,ZFX
miR-3688-5p (miRNAs w/seed GUGGCAA)		mature microrna	Activated	2.971	bias	0.000702	A1CF,ACSL1,AMOT,ARHGDIB,CAST,CCL21,CPT1C,CYP19A1,GRHL2,IDE,IGF1R,ITGA2,KIAA1551,LAMC2,LPGAT1,MAT2A,MRI1,MTF2,NAA50,NFIB,NFYC,NPHS2,ODF2L,PALLD,PARP9,PDE4DIP,PEG3,PPP1R7,PTPRK,RBM25,SCARA5,SESN2,SMPD4,SOCS4,TCF19,TYMS,VLDLR,WDR33,WWP2,ZFX
miR-4697-3p (miRNAs w/seed GUCAGUG)		mature microrna	Activated	2.483	bias	0.000709	ADGRF2,AHCTF1,AMOT,CAST,CDH5,CDK5R1,CXCL13,DPF2,EML4,EYA3,FADS1,FAM155B,HILPDA,HSPA4L,ITIH3,KIAA1644,LPCAT1,LRRC8C,LRTOMT,METAP1,MS4A2,NFIA,NIP7,PRSS12,SLC11A2,SLC26A3,TOR1AIP2,TP53RK,TPP1,TRIM3,TSPAN9,ZNF395
miR-4468 (miRNAs w/seed GAGCAGA)		mature microrna	Activated	2.385	bias	0.000719	ADAR,ADGRF2,AHCTF1,ALDOB,ATAD2B,CAMK2N2,CD93,CXCL12,CYP19A1,CYYR1,DBNDD1,DKC1,ENPP1,EYA3,FAM155B,FBXL20,FCRL5,FLT1,FUCA1,FXYD6,GYS1,HRH1,IRF2BP1,ITGA6,KIAA1324,LUZP1,MAN1A1,MYO19,ODF2L,PARP9,PPP1R3B,PSD3,PTOV1,PTPRR,RBFA,RET,RGS12,RUNDC3A,SCAMP5,SLC2A1
ESR2		ligand-dependent nuclear receptor		0.752		0.00072	AKAP12,CD93,CYP19A1,EMB,FOS,IGF1,IGF1R,ITGA2,LEP,LHB,MYOD1,OXT,TAC1,VEGFA	232 (22)
miR-592 (and other miRNAs w/seed UUGUGUC)		mature microrna		1.825	bias	0.000728	ABHD5,AK3,ANK3,ANTXR2,ATRN,CP,CXADR,CXCL14,DNAJC21,EHF,ENC1,IGF1,KATNAL1,LMCD1,LRRC8C,LRRFIP1,MAB21L3,MAF,NFIA,NIP7,ODF2L,PRELID2,PTHLH,QSOX1,SOCS4,TIA1,TRUB2,VSTM4,ZBTB7A
miR-1910-5p (miRNAs w/seed CAGUCCU)		mature microrna		0.673	bias	0.00073	ABCB11,ABHD5,ALOX15,ARL4C,ATRN,CDK5R1,CRADD,CRNKL1,FAM57A,FGG,FLT1,GPR39,GSS,HTR1D,HTRA3,ID4,ISOC1,ITGA6,L3MBTL3,LYRM4,NCAPG,NFIB,NOLC1,PDE4DIP,PODNL1,PSD3,PTPRK,RGS2,RHPN2,RRM2B,RUNDC3A,SLC35F2,TJP2,TMCC3,TOB1,WDR33,ZCCHC10,ZNF395
miR-4422 (miRNAs w/seed AAAGCAU)		mature microrna	Activated	2.94	bias	0.000738	ABCB11,ABHD17C,ACTL6A,ARID2,CDC27,DNAJC15,DNAJC21,ENOPH1,HOXD8,HSPA4,L3MBTL3,LRIG3,LRPPRC,LYRM4,NT5DC1,PIP4K2A,RASA1,RCAN1,RRAGD,SNRPF,TOR1AIP2,TSHZ2,TXNDC15,UBE2F,WDR26,ZNF322,ZNF630
miR-571 (miRNAs w/seed GAGUUGG)		mature microrna	Activated	2.229	bias	0.000738	ACSL1,ACTL6A,ADAMTS3,ADM5,ARL4A,ATP2B2,DMBT1,FADS1,GINS4,GLUL,GPAT3,IGF1,ITGA6,LPGAT1,MID1,MSL3,NIP7,PAPOLA,PCSK1,PDE4DIP,PEG3,PGM3,PIP4K2A,SPTLC2,TMCC3,YLPM1,ZBTB7A
miR-330-5p (and other miRNAs w/seed CUCUGGG)		mature microrna		1.661	bias	0.000748	AAK1,ADAM19,AMD1,AMOT,ATAD2B,ATP2B2,BHLHE40,CD247,CDH3,CDH5,CEBPA,CELF2,CERCAM,CLN6,CRY2,CYFIP2,DTX3L,DTX4,FADS1,FAF2,FAM107B,FAM155B,FAM183A,FBXL20,FBXO41,FUCA1,GINS4,GJA4,GPR39,GYS1,HRH1,ITGB8,KHK,KLF1,KLF11,LEP,LRRC20,LYRM4,MED15,METAP1,METTL21A,NFYC,NGB,PARP11,PCSK2,PEG3,PKIG,RASSF1,SESN2,SLC11A2,SLC19A2,SLC2A1,SMPD4,STAMBP,TAC4,TOR1AIP2,UBTF,VLDLR,ZBTB7A,ZNF322,ZNF395
CEBPB		transcription regulator		-0.835		0.000751	ALB,CCNA2,CDH3,CEBPA,CP,CYP19A1,CYP1A1,DHRS1,E2F3,FAS,FOS,GADD45A,GAS1,IFITM3,IGF1,IL10,IVL,LEP,MYC,RCAN1,STAR,TAC1,VLDLR	257 (25)
miR-139-5p (miRNAs w/seed CUACAGU)		mature microrna		1.157	bias	0.000753	AAK1,AK3,ATP2B2,CDS2,DDIT4,EDEM1,ENC1,EYA3,FLT1,FOS,FPGT,IGF1R,ITGB8,KIF3A,LRPPRC,MAF,MEF2A,MSL3,MYCBP,NAA50,NFIA,NFIB,NRCAM,PSD3,ROCK2,SPRED1,STAMBP,TIA1,TMCC3,TNFSF10,TOP2A,UBE2F,VSTM4,WDR26,ZFX,ZNF630
FADD		other		0.174		0.000756	ASB13,FAS,FOS,IFIT2,IFNG,MYC,NFIL3,PARP11,SOCS1	205 (18)
miR-621 (miRNAs w/seed GCUAGCA)		mature microrna		1.846	bias	0.000762	ACSBG1,ANK3,ANTXR2,ARL4A,CALML4,CD247,DKC1,ENSA,MAB21L3,MAF,MAP3K9,NFIB,PFKFB3,PTP4A2,RNLS,RRAGD,SPTLC2,SRSF6,STAMBP,TCF21,TNFSF10,TOR1AIP2,USP37,VGLL3,WWP2,YLPM1,ZBTB7A
miR-1273f (miRNAs w/seed GAGAUGG)		mature microrna	Activated	3.808	bias	0.000773	AQP11,ARHGDIB,ATRN,CALML4,CNP,DNAJC3,DTX3L,ENSA,FADS6,GCLM,GINS4,GRHL2,HILPDA,HNMT,IFIT3,KDR,LRPPRC,MECR,MED15,METTL21A,MRI1,NAA40,NAA50,OAF,PDE4DIP,PECAM1,PIGP,POLR3A,QPCTL,RBL1,SLCO2B1,SPTLC2,SRGAP1,STAR,TCEA3,TMEM19,TNFSF10,TOP2A,TPP1,TRUB2
USF1		transcription regulator		-0.924	bias	0.000776	AKAP12,CD2,CEBPA,CYP19A1,DUSP1,FASN,FCER1A,GPAM
miR-890 (miRNAs w/seed ACUUGGA)		mature microrna		0.052	bias	0.000782	AAK1,ABHD17C,AHCTF1,AIFM2,AKIP1,AMD1,DCP1A,EML4,ENPP1,GLDN,HLCS,INTS6,ITGA2,KATNAL1,METAP1,NRCAM,PALLD,PEG3,PLEKHA8,RCAN1,SLC19A2,SOCS4,TBC1D8,TMEM39A,TOR1A,TTC9,ZNF280D,ZNF395
SOX2		transcription regulator		0.242		0.000793	ALB,AMOT,BHLHE40,CXCL14,DLX2,DUSP1,FLT1,FOS,IGF1,IRF6,KDR,KRT19,L3MBTL3,MEF2C,MTF2,NOTCH4,PECAM1,PEG3,VEGFA,WLS	33 (2)
AGN194204		chemical drug				0.000797	ACAT2,CCNA2,DUSP1,MYC,SMC4,STIM1,TOP2A
G protein alphai		group				0.000819	PTHLH,SLC6A3,STAR	120 (11)
SNED1		other				0.000819	GAPDH,IGF1,SLC2A1
QRFP		other				0.000819	ACSL1,CEBPA,SLC27A1
Cebp		complex				0.000819	ALB,IVL,MYOD1
CYP4F2		enzyme				0.000819	FLT1,KDR,VEGFA	122 (12)
miR-647 (miRNAs w/seed UGGCUGC)		mature microrna		1.121	bias	0.000822	AAK1,ABHD6,ABI3,ALKBH5,ASB13,COMMD9,CRY2,DDIT4,EIF4EBP1,GADD45A,GGA2,IDE,IFIT2,IFNG,IKBKG,ITGA6,LFNG,LGI4,LRRC20,MAP3K9,MCUR1,MS4A2,MYCBP,NAGPA,NR2F2,ODF2L,PECAM1,PEG3,PFKP,PIP4K2A,POLR1D,PUS1,S1PR5,SAR1B,SESN2,SLC19A2,SLCO2B1,SMPD4,SS18,TJP2,TMEM201,TNFSF10,TRAPPC13,TSTD2,URM1,VSTM4,WLS,ZCCHC10,ZDHHC14
miR-3127-3p (and other miRNAs w/seed CCCCUUC)		mature microrna	Activated	4.468	bias	0.000839	ADAM19,ALKBH5,ATRN,CALML4,CBL,CCDC3,CELF2,CNP,DBNDD1,DICER1,DIO2,DROSHA,ENSA,ERO1A,EYA3,FAF2,FAM155B,GLUL,HILPDA,HLCS,INTS7,LPCAT3,LRPPRC,LRRC20,LRRFIP1,MAB21L3,MAFF,MCAT,NCK2,NFIA,NGB,NOL6,PCP4L1,PCSK1,PHACTR1,PHLDB2,RBL1,SCAMP5,SLC11A2,SPTLC2,SS18,STAR,TCF19,TMEM144,TMEM86A,TSHZ2,WDR81,WNK4,ZNF322
Rb		group		0.699		0.000857	CCNA2,CYP1A1,DLX2,DNMT1,MYC,RBL1,TOP2A,TYMS	201 (17)
miR-3650 (miRNAs w/seed GGUGUGU)		mature microrna		1.026	bias	0.000861	ATRN,CADM2,CAST,EHF,FAM57A,FBXL20,FLT1,FOS,GGA2,IFI16,KHK,MAF,MEF2C,MTSS1,NFIB,NR1I2,ODF2L,PATL1,PECAM1,PEG3,PFKFB3,PLOD1,PPP1R7,PQLC2,RBM25,SLC11A2,TMCC3,TMX4,VEGFA,WDR33,WNK4
INS		other		0.923		0.000862	CIDEA,EIF4EBP1,FASN,FOS,IGF1,IGF1R,LEP,OXT,SLC2A1,VEGFA,VLDLR	219 (22)
miR-2682-5p (and other miRNAs w/seed AGGCAGU)		mature microrna		1.986	bias	0.000863	ACSL1,ACTL6A,ADAM19,ATP1B3,BTG2,CADM2,CBL,CELF2,DBNDD1,DLAT,ENPP1,FAM122A,FGF18,GAS1,GCLM,HBB,HN1,HTRA3,IFIT3,KLF11,MAP3K9,MAT2A,MTCH2,MYC,NOLC1,PAPOLA,PFKFB3,PHACTR1,PLEKHA8,PPP6R2,PRELID2,PTP4A2,PTPRG,SLC19A2,SRGAP1,STBD1,TMCC3,TMEM19,TMEM86A,UBE2F,VEGFA,WDR26
DLL4		other		1.308		0.000866	FLT1,IL10,KDR,MAF,NR2F2	80 (7)
mir-193		microrna	Inhibited	-2.236		0.000866	MYF6,MYOD1,NPHS2,PLAU,VEGFA
miR-3943 (miRNAs w/seed AGCCCCC)		mature microrna	Activated	2.208	bias	0.000867	ADM,ALKBH5,ATAD2B,ATP2B2,ATRN,BRF2,CALML4,CD93,CEP44,CLDN2,CLN6,COMMD9,CRY2,DDIT4,ENSA,FAM155B,FBXO41,FBXO9,FCRL5,GAS7,GPATCH4,HDAC4,ITGA6,KIAA1644,L3MBTL3,LGMN,LPCAT1,LRRC20,LRRFIP1,LUZP1,LYRM4,MAFF,MCAT,MON1A,MS4A2,MTSS1,NASP,NOL6,NSD1,ODF2L,PDE4DIP,PGF,PIP4K2A,PLBD2,PODNL1,PRKCZ,RBFA,RET,RGS12,RNF40,S100B,S1PR5,SCAMP5,SDCBP2,SPTLC2,TBC1D32,TCAP,TEX2,TMEM201,TMEM45A,TSPAN9,UBTF,VASH1
thioguanine		chemical drug				0.000869	MYC,TNFSF10
MSK1/2		group				0.000869	DUSP1,FOS	154 (7)
APBB2		other				0.000869	LRP1,TYMS
ADGRG1		g-protein coupled receptor				0.000869	IGF1,VEGFA
OMG		g-protein coupled receptor				0.000869	FOS,MYC
TYMS	2.47	enzyme				0.000869	MYC,TYMS
MED26		transcription regulator				0.000869	ANKRD37,MYC
RGS3		other				0.000869	MYC,SNAI1	201 (23)
OXTR		g-protein coupled receptor				0.000869	FOS,PRKCZ	125 (13)
CDO1		enzyme				0.000869	IGF1,MYOD1
AA-861		chemical reagent				0.000869	IGF1R,STAR
gliclazide		chemical drug				0.000869	SLC2A1,SLC2A3	105 (7)
aprotinin		biologic drug				0.000869	PLAU,VRK1
tegaserod		chemical drug				0.000869	FOS,TAC1	105 (7)
Akt		group		1.064		0.000874	ADM,BHLHE40,CIDEA,CP,CXCL12,CYP19A1,FAS,FOS,IGF1,IGF1R,IL10,MYC,SKP2,SNAI1,VEGFA	229 (23)
miR-149-3p (and other miRNAs w/seed GGGAGGG)		mature microrna	Activated	3.217	bias	0.000878	ADAM19,ADAR,ADM5,AIFM2,ALKBH5,ALOX15,AMER3,AP1M1,ARL4C,ARSA,BBIP1,CADM1,CBL,CD93,CDC23,CDS2,CERCAM,CNP,COL6A1,CRY2,CXCL12,CYFIP2,CYTH2,DBNDD1,DLX2,DTX4,EIF4EBP1,EYA3,FAM155B,FASN,FBXO41,FBXW4,FLT1,FYN,GLDN,GLYR1,GPAT3,GPATCH4,HDAC4,HEATR1,HLCS,HOXA1,HR,IKBKG,INHA,IRF2BP1,KATNAL1,KLF1,LAMC2,LETM1,LFNG,LPCAT3,LRP1,LRTOMT,LYRM4,MAFF,MCUR1,MTCH2,MXD4,MYOD1,NAA40,NAA50,NANP,NAT9,NEK2,NOTCH4,NR2F2,OAF,…
miR-499-3p (and other miRNAs w/seed ACAUCAC)		mature microrna		1.805	bias	0.000881	AQP11,BUB3,CACYBP,CD93,CDK5R1,CEP44,CXCL13,EML4,EWSR1,EXOSC2,FBXL20,HDAC4,HEATR5A,ID4,KCNE3,MAF,MAT2A,NEK2,NFIL3,NNT,ODF2L,PCSK2,PHLDB2,PIGC,RRAGD,SF3B1,TOR1A,VRK1,ZNF280D,ZNHIT6
miR-4659a-3p (and other miRNAs w/seed UUCUUCU)		mature microrna		1.759	bias	0.000886	ABHD5,AKAP12,ANKRD46,ANXA5,CACYBP,CBL,CP,CXCL13,DESI2,DIO2,DNAJC21,EHF,ENOPH1,FBXO9,GPATCH4,HBEGF,HN1,INTS10,KCTD11,KIF3A,LGR4,MAF,MTAP,PHACTR1,S100PBP,SESN1,SMIM11A,TNFSF10,TSHZ2,VSTM4,VWDE,ZNHIT6
miR-3177-3p (miRNAs w/seed GCACGGC)		mature microrna		0.927	bias	0.000893	ADM,ANKRD44,ATP1B3,BTG2,CEBPA,CLN6,CNP,CSTF1,CYTH2,E2F3,GPAM,GYS1,HSPA4L,LFNG,LPCAT1,MECR,METRNL,MXD4,PARP9,PQLC1,SESN2,SLC6A3,SRGAP1,TPCN2,ZNF280D
miR-4326 (miRNAs w/seed GUUCCUC)		mature microrna		1.596	bias	0.000907	ANTXR2,BMPR1B,CDC23,CLEC14A,CP,CXCL14,EML4,FAF2,FAM65B,GSE1,HDAC4,HRH1,HSPA4,LRTOMT,MCAT,METAP1,MRPS33,MXRA5,NAA40,NANP,PHF12,SAMD8,SOCS4,STEAP4,TCF21,TRAPPC12,TXNDC15,WIPF2,ZFX,ZNHIT6
bromocriptine		chemical drug		-0.13		0.000918	ANXA5,FAS,LHB,PCSK2,POU1F1,SLC2A1	81 (7)
CCR5		g-protein coupled receptor		-0.14		0.000918	CXCL12,FAS,FOS,IFNG,IL10,SLPI	224 (21)
oleic acid		chemical - endogenous mammalian		-1.869		0.000978	ACSL1,FASN,FOS,GADD45A,GAPDH,IGF1,LHB,RXRA,SPHK1	240 (20)
miR-1204 (miRNAs w/seed CGUGGCC)		mature microrna	Activated	2.791	bias	0.000981	AMOT,AP1M1,BNIP3,CALML4,CAMK2N2,CCT6A,CD93,DPF2,GAS1,GYS1,INHA,LGI4,LUZP1,MAB21L3,MSC,NAT9,NIP7,PODNL1,PTPRG,RGS12,RNF40,SLC16A3,SRSF6,STARD8,TSPAN17,WDR33,WDR93,ZBTB7A,ZNF395
Ca2+		chemical - endogenous mammalian		1.433		0.000989	CYP1A1,DUSP1,E2F3,ENPP1,FOS,HBEGF,IFNG,IGF1R,IL10,ITGA6,IVL,LHB,MEF2A,NR4A3,STAR,TAC1,VEGFA	218 (21)
miR-661 (miRNAs w/seed GCCUGGG)		mature microrna	Activated	2.573	bias	0.000992	AAK1,AIFM2,ANK3,ANKS3,ATF6B,ATP2B2,CAMK2N2,CBL,CDH5,CDK5R1,CDS2,COA7,CXCL12,DBNDD1,DDX42,DIO2,ENSA,EYA3,FADS6,FASN,FBXL20,FBXO41,FBXO9,FXYD6,GAS7,GGA2,GINS4,GLDN,HOXA1,HR,HTRA3,HYAL1,KCNE3,KDR,KIAA1324,KIAA1644,LAMC2,LETM1,LPAR3,LUZP1,MAB21L3,MAP10,MGMT,MRI1,NAA40,NAT9,NFIB,NFYC,NGB,PATL1,PIK3C2B,PLOD1,PNPLA3,POLR3A,RBFA,RNF40,S1PR5,SESN2,SLC11A2,SLC25A22,SLC27A1,SLC2A1,SLC35F2,SLC3A2,SNAI1,SRGAP…
Il3		cytokine		0.053		0.001	ANPEP,BHLHE40,FAS,FOS,IGF1,MYC,NFIL3	236 (23)
miR-135a-5p (and other miRNAs w/seed AUGGCUU)		mature microrna		1.156	bias	0.001	ABHD5,ACSL5,ADAM19,ADAR,ALDOB,ANK3,AREL1,ATP2B2,CALML4,CERCAM,CXCL12,DCP1A,DRAM2,DTX3L,EIF2S1,GAS7,GSE1,HDAC4,HEATR5A,ITGA2,KIF3A,LPGAT1,LRPPRC,LRRFIP1,MAN1A1,MEF2A,MEF2C,MID1,MON1A,MTSS1,MXRA5,NMRAL1,PATL1,PCP4L1,PEG3,PHLDB2,PIK3R2,PKIG,PRELID2,PSD3,ROCK2,SAMD8,SLC13A4,SOCS4,STAMBP,TCF19,TEX2,TSHZ2,VLDLR,XPO7,ZNF322
norepinephrine		chemical - endogenous mammalian		0.865		0.00101	CRY2,DIO2,DUSP1,FCER1A,FOS,IFNG,IGF1R,IL10,LEP,MAT2A,NR4A3,SLC2A1,VEGFA	204 (19)
miR-4783-3p (miRNAs w/seed CCCGGUG)		mature microrna	Activated	2.994	bias	0.00102	ASB13,CRY2,DCP1A,DDX42,DENND4B,DMBT1,EXOSC2,FLT1,FXYD6,GLDN,KIAA1551,KIAA1644,MAB21L3,NAA40,NCK2,PALLD,PIK3R2,RET,RRS1,RXRA,SLC25A22,SNAPC5,TMEM201,TTLL12,WWP2
miR-3175 (miRNAs w/seed GGGGAGA)		mature microrna		1.464	bias	0.00102	ACSL5,ADAM19,ADGRF2,BMPR1B,BTG2,BUB3,CAMK2N2,CDH5,CDS2,CERCAM,COA7,COMMD9,CYFIP2,DBNDD1,DESI2,DIO2,EMILIN1,ENC1,ENO2,FBXO41,FBXO9,FCRL5,FYN,GAPDH,GAS7,GLDN,GRHL2,GSE1,HTRA3,IGF1R,KIAA1324,LPCAT3,LRP1,LRPPRC,LRTOMT,LYRM4,MAFF,MCAT,MSC,MTAP,NAA40,NFYC,OAF,PBRM1,PCP4L1,PECAM1,PNPLA3,POLR1D,POLR3A,PPP1R13L,PQLC2,PTHLH,SAMD8,SCAMP5,SCARA5,SESN2,SLC2A1,SORBS2,STIM1,TCEB3,TMEM86A,TRH,TRIM3,TSPAN9,TTC9,U…
miR-3616-3p (miRNAs w/seed GAGGGCA)		mature microrna		0.546	bias	0.00102	CBL,CD2,CEBPA,CELF2,CERCAM,CLDN2,CLN6,CNP,CYTH2,DESI2,DICER1,DKC1,DTX4,EDEM1,EIF2S1,ERO1A,FAM134A,FAM155B,FCGR1A,FYN,GADD45A,GLUL,HDAC4,KIAA1324,KIF1B,LAMC2,LRRC20,LUZP1,MAFF,MED15,MEF2C,MXD4,NFYC,PGF,PLEKHA8,PODNL1,RASSF1,RXRA,S1PR5,SHE,SLC13A4,SLC2A3,SLCO2B1,TCF21,TJP2,TMEM201,TOR1AIP2,TRH,TTLL12,VEGFA,VSTM4,WDR26,ZER1,ZNF630
glycine		chemical - endogenous mammalian		0.152		0.00103	ALB,FOS,IL10,VEGFA	194 (18)
TNK1		kinase		-1	bias	0.00103	IFI16,IFIT2,IL10,TNFSF10	107 (7)
FASN	-2.05	enzyme		-1		0.00103	FASN,GPAM,IL10,SKP2	218 (16)
NCL		other				0.00103	DICER1,HBB,MYC,RET
Raf		group		0.492		0.00104	ANPEP,FOS,IFI16,IGF1R,TOP2A	223 (21)
SL 327		chemical - protease inhibitor		0.277	bias	0.00104	CLN6,FOS,MEF2C,NOCT,ZNF280D
JAG1		growth factor		-0.625		0.00104	IFNG,MYC,NR2F2,PTPRK,RNF128	117 (13)
miR-4436b-5p (miRNAs w/seed UCCACUU)		mature microrna	Activated	2.201	bias	0.00105	ADAMTS3,ALDOB,ANTXR2,CADM2,CD93,CEP44,CLEC14A,CP,CYP19A1,DPT,DTX3L,ERO1A,FAM162B,FAM57A,GAS7,GINS4,GLRX,HEATR1,HILPDA,IDE,ITGA2,LMCD1,MTAP,NDUFA5,NSD1,PCP4L1,PIP4K2A,RNLS,SAMD8,SCAMP3,SMC4,TCF19,TNFSF10,TPP1,WDR33,ZNF280D
miR-136-5p (miRNAs w/seed CUCCAUU)		mature microrna		1.5	bias	0.00105	AAK1,ANKRD46,ATRN,B3GALNT1,CBL,DCP1A,ENSA,EWSR1,EXO1,EXOSC2,FBXL20,FLT1,HLCS,IGSF1,KDR,LRIG3,LYRM4,MAMDC2,MFSD6L,MID1,NFIB,NR2F2,NR4A3,PATL1,PGM3,PSD3,PTPRK,RET,S1PR5,STARD8,STBD1,TPCN2,UBE2F,USP37,XPO7,ZNF32
miR-4423-3p (miRNAs w/seed UAGGCAC)		mature microrna		1.703	bias	0.00105	AHCTF1,AKAP12,AMOT,ARID2,ATRN,CADM2,CD93,CDH3,CYYR1,DCP1A,DLAT,DNAJC3,FAM134A,HBB,HBEGF,HYAL1,IFI16,IGSF1,KIAA1644,KIF1B,LGR4,MAB21L3,MOAP1,MRPS23,NNT,PTHLH,SHE,SPRED1,TAC4,TPP1,VSTM4
miR-1279 (miRNAs w/seed CAUAUUG)		mature microrna		1.93	bias	0.00105	DLAT,DLX2,GCLM,ITGB8,METAP1,METTL21A,NRCAM,ODF2L,TAC1,TCF21,WDR33,ZNF395
miR-602 (miRNAs w/seed ACACGGG)		mature microrna		1.182	bias	0.00105	DNAJC3,DPF2,EYA3,FBXL20,GINS4,HDAC4,HOXA1,MAP3K9,MED15,MID1,MRPS33,MTF2,NFIA,NRCAM,PHF12,PIP4K2A,R3HDM4,RBFA,RNF128,RRAGD,SLC25A20,SOCS4,SPRED1,TMCC3,WIPI1
4-hydroxytamoxifen		chemical drug		1.272		0.00105	CYP19A1,FOS,IFNG,IGF1,IGF1R,IL10	160 (17)
NOS2		enzyme		-0.437		0.00105	BNIP3,CD3E,CP,FAS,FASN,IFIT3,IFNG,IL10,KDR,LEP,PLSCR1,TCAP,TNFSF10,VEGFA	229 (19)
CAV1		transmembrane receptor		0		0.00106	CRNKL1,FAS,FOS,IFNG,IL10,KDR,KRT19,LEP,SLC1A1,SLC2A3,TJP2	142 (18)
NFKB1		transcription regulator		0.202		0.00106	DICER1,DROSHA,DUSP1,EHF,FAS,FGG,FOS,IFNG,IKBKG,IL10,MYC,NMI,PLAU,STIM1,TNFSF10,VEGFA	205 (20)
KITLG		growth factor		0.063	bias	0.00106	CCNA2,CD247,CEBPA,FOS,IFNG,IGF1R,IL10,KDR,KLF1,MEF2C,MS4A2,PLSCR1,PTPRR,RNF128,SOCS1,STIM1	219 (24)
RUNX2		transcription regulator		0.266		0.00106	CEBPA,CYP19A1,FGF18,LEP,LHB,MYOD1,PLAU,SNAI1,VEGFA	199 (18)
IGF2		growth factor		1.452		0.00107	ARL4A,DUSP1,GADD45A,GAS1,HBEGF,HELLS,IGF1,IGF1R,IL10,LEP,MYC,MYOD1,VEGFA	229 (25)
miR-1914-5p (miRNAs w/seed CCUGUGC)		mature microrna		1.361	bias	0.00108	ABHD5,AMER3,CD247,CDC23,CEP44,DESI2,ERO1A,FAM155B,FBXO41,GAS7,GLDN,GPR39,HILPDA,KIAA1644,KLRC4-KLRK1/KLRK1,LAMC2,LMCD1,LRRFIP1,MID1,MTF2,MYCBP,NAT9,NOCT,ODF2L,PALLD,PARP9,PCSK2,PEG3,PIPOX,PITRM1,PPP6R2,SESN2,TCEB3,TOR1AIP2,TP53RK,TPCN2,VASH1,VSTM4,ZFYVE1
miR-593-3p (miRNAs w/seed GUCUCUG)		mature microrna	Activated	2.455	bias	0.00109	A1CF,AREL1,BAG3,CYP1A1,DCP1A,DLX2,EHF,FAM107B,HRH1,HYAL1,L3MBTL3,LETM1,LRTOMT,LUZP1,MAN1A1,MTF2,NCOA7,NDUFA5,NSFL1C,PLEKHA8,RNLS,RRS1,S100B,SCARA5,SERPINB11,SNAPC5,TCF21,TMX4,TRIM3,TSHZ2,UBTF,WDR33,ZFX
miR-3194-3p (miRNAs w/seed GCUCUGC)		mature microrna	Activated	3.774	bias	0.00109	ADAR,ADGRF2,ALKBH5,AMER3,ARID2,ATAD2B,ATP2B2,BMPR1B,CBL,CCDC3,CDS2,DCP1A,DENND4B,DKC1,DPT,DTX3L,ENPP1,ENSA,FBXO41,GPATCH4,HOXA1,IFIT3,IVL,KHK,LEP,LUZP1,NAA50,NCK2,NDUFAF6,PCSK1,PODNL1,PTOV1,RPS19BP1,SLC1A1,SLC35F2,SMPD4,SPRED1,TBPL1,TCEB3,TCF19,TEX2,TFDP1,TJP2,TRIM3,TRRAP,VEGFA,YLPM1
miR-4639-3p (and other miRNAs w/seed CACUCUC)		mature microrna	Activated	2.073	bias	0.0011	AREL1,BTG2,CDC23,DENND4B,DIO2,DKC1,DPT,DTX4,ENC1,ENPP1,EXOSC2,FAM155B,FBXO9,HEATR5A,MCAT,PNPLA3,POLR1D,RALGDS,RNLS,SHE,SPTLC2,TIA1,TMEM201,TNFSF10,USP37,WDR33,WNK4,ZFP1,ZNF395
F2RL1		g-protein coupled receptor		0.037	bias	0.00112	FAS,FOS,HBEGF,IFNG,IL10,MSC,VEGFA	192 (21)
calphostin C		chemical - kinase inhibitor		-0.478		0.00112	DUSP1,FOS,IGF1R,MYC,SLC2A1,STAR,VEGFA	195 (21)
miR-4269 (and other miRNAs w/seed CAGGCAC)		mature microrna		0.826	bias	0.00113	ADGRF2,ANXA5,ARSA,BHLHE40,CACYBP,CAST,CCDC3,CDS2,CRY2,DPF2,E2F3,EHF,EIF4G1,ENO2,ERO1A,EXOSC2,FBXL20,FBXO41,GINS4,GSS,HEATR1,IFIT2,IGSF1,IRF6,MAFF,MCAT,MSL3,MXD4,NAA50,NFIA,NR1I2,PACSIN2,PBRM1,PCP4L1,PCSK1,PEX3,PIK3C2B,RGS12,RRAGC,SAMD8,SLC2A1,SLC2A3,SORBS2,SS18,TCAP,TIGD2,TMEM248,TPST1,TSHZ2,VSTM4
phorbol esters		chemical - other		1.709		0.00115	DUSP1,FOS,IFNG,IL10,IVL,PLAU,SLC6A3,TNFSF10,TRH	192 (22)
COL18A1		other		-0.423		0.00115	CDH5,DDIT4,EGLN1,FOS,KDR,MYC,PECAM1,PLAU,VEGFA	212 (21)
D-glucose		chemical - endogenous mammalian		-1.679		0.00116	ACSL1,ALDOB,ATP2B2,CBL,CEBPA,DDIT4,DECR1,FASN,FOS,GAPDH,GLUL,IFNG,IGF1,IGF1R,KDR,LEP,MYC,NR4A3,PFKFB3,PNPLA3,SLC2A1,SPHK1,VEGFA,WWP1	238 (23)
miR-539-5p (miRNAs w/seed GAGAAAU)		mature microrna		1.309	bias	0.00118	AAK1,ABHD5,ADM,AMD1,ATP2B2,CELF2,CEP44,CXCL14,CYP19A1,DCP1A,FBXL20,FCGR1A,FCRL5,GLT8D1,HDAC4,HLCS,IDE,IGF1R,ITGA2,KATNAL1,LAMC2,LGR4,LPGAT1,NFIB,PAPOLA,PNMA1,POLR1D,PRSS12,RNF128,RRAGD,SAMD8,SLC11A2,SLC1A1,STAMBP,TAC1,THOC2,TIA1,TSHZ2,UBTF,VGLL3,ZFX,ZNF382
ACOX1		enzyme		0.577		0.00119	ACSL1,CXCL12,FASN,GADD45A,IGF1,LPCAT3,PIGP,PIPOX,PLSCR1,RGS2,SLC37A4,SLCO2B1	105 (7)
IRF1		transcription regulator		-1.668		0.00119	IFI35,IFIT2,IFIT3,IFITM3,IFNG,IL10,LTB,MAP4K4,MYC,SLPI,SOCS1,TNFSF10	201 (17)
SST		other	Activated	2.401		0.0012	FOS,GHRHR,IFNG,IGF1,IGF1R,IL10	211 (23)
T3-TR-RXR		complex		1.039	bias	0.0012	COL6A3,FASN,PFKP,SLC16A3,SLC2A1,TRH
N-acetylsphingosine		chemical reagent		0.842		0.0012	BNIP3,FOS,MYOD1,RBL1,RXRA,SPHK1	120 (9)
D-galactosamine		chemical - endogenous mammalian		0.184	bias	0.0012	ALB,FOS,IFNG,IL10,MYC,TNFSF10	222 (20)
ADCYAP1		other		0.352		0.00122	ATRN,BTG2,CCNA2,EMB,FOS,GAS1,GCLM,IL10,LHB,MAN1A1,POU1F1,PPP1R3B,PTPRR,SCAMP3,SH2B2,SLC2A1	214 (22)
miR-4514 (and other miRNAs w/seed CAGGCAG)		mature microrna	Activated	2.336	bias	0.00122	ACSBG1,AMER3,ANPEP,ARSA,ATP1B3,CAPG,CDA,CEP44,EMB,FAM134A,FBXL20,FLT1,GCLM,GINS4,HEATR1,HN1,INTS7,IRF6,LGR4,LRRFIP1,METTL21A,MID1,MXD4,NAA50,NELFA,NFIL3,NNT,PECAM1,PEX3,PHACTR1,PHF12,PNPLA3,PODNL1,PPP6R2,PTP4A2,R3HDM4,RNF40,RXRA,SAMD8,SCAMP5,SLC19A2,SNAI1,SPTLC2,TCF21,TEX2,TFDP1,TJP2,TMEM86A,TOR1A,TSPAN9,VASH1,WWP2,ZER1,ZFYVE1,ZMAT3
miR-4690-5p (miRNAs w/seed AGCAGGC)		mature microrna		0.89	bias	0.00123	ABI3,ADAM19,ATP2B2,ATRN,CADM1,CALML4,CAPG,CEBPA,CNP,COL6A1,CSTF1,CYP1A1,CYTH2,EHF,EXOSC2,FBXL20,GAS7,HEATR1,HILPDA,IGF1,ITGA6,LAMC2,LPCAT3,LPGAT1,LRTOMT,MCAT,MFSD6L,MS4A2,MSL3,NAGPA,NR1I2,PARP9,PATL1,PDE4DIP,PECAM1,PEX12,POLR1D,PQLC2,PRELID2,PSD3,RET,RUNDC3A,SLC19A2,SLC35F2,TEX2,TMEM248,TP53RK,USP37,VSTM4,WBP2
SRF		transcription regulator		-0.151		0.00123	AKAP12,AMD1,CSRP2,FLT1,FOS,GPATCH4,IGF1,ITGA6,KDR,LMCD1,LRP1,MAP4K4,MYOD1,NCOA7,SLC2A1,SLPI,TCAP,TJP2
diclofenac		chemical drug		-0.73		0.00123	FOS,IFNG,IL10,MYC,VEGFA	178 (19)
indican		chemical - endogenous mammalian	Inhibited	-2.219		0.00123	ALB,BNIP3,CA9,HILPDA,SLC2A1	155 (7)
F2	2.04	peptidase		0.683	bias	0.00123	CCNA2,DUSP1,FLT1,FOS,HBEGF,IGF1,IGF1R,KDR,MTSS1,MYC,NCOA7,NR4A3,RCAN1,S100B,SLC2A3,TNFSF10,VEGFA	186 (22)
DDX58		enzyme		-1.054	bias	0.00125	IFI35,IFIT2,IFIT3,NMI,SOCS1,TNFSF10,TOR1AIP2	147 (15)
TAF4		transcription regulator		-0.625		0.00125	CDH3,DLX2,EHF,GAS1,HBEGF,ITGA6,MAFF,MAP4K4,PENK
TCF7L2		transcription regulator		-0.385	bias	0.00126	ACSL1,CCP110,CNP,DRAM2,ENTPD5,GCLM,GLUL,GSS,ID4,IL10,LAMC2,LPAR3,MAN1A1,MAP4K4,MYC,NPC2,PIP4K2A,POLR1D,RALGDS	149 (7)
miR-369-5p (miRNAs w/seed GAUCGAC)		mature microrna	Activated	2.554	bias	0.00126	HSPH1,ID4,MACF1,NCOA7,NNT,ODF2L,PIK3R2,PLEKHA8,RCAN3,TYMS
LEPR		transmembrane receptor		0.858		0.00126	ALOX15,ANXA5,APOA4,DNAJC7,EIF4EBP1,FASN,FOS,GPAM,IGF1,LEP,LGMN,MAP4K4,TRH	167 (18)
miR-1287-5p (miRNAs w/seed GCUGGAU)		mature microrna		1.521	bias	0.00127	ANKRD46,CALML4,CLDN2,CXADR,CYP19A1,DESI2,EXOSC2,FADS1,FBXL20,FCER1A,HSPA4,IGSF1,KIF1B,LGR4,LRTOMT,MFSD6L,MRPS23,MS4A2,MTF2,NAA50,NANP,NFIB,PNPLA3,PPP1R3B,S100B,SCARA5,SLC13A4,TCEB3,TIA1,TSTD2,VSTM4
miR-3097-5p (and other miRNAs w/seed ACAGGUG)		mature microrna	Activated	2.919	bias	0.00127	ATAD2B,CACYBP,CAST,CBL,CXADR,DRAM2,EDEM1,FAM162B,FAM65B,FCRL5,GCLM,GINS4,GLUL,HEATR5A,IDE,IGF1R,IL10,LRRC8C,MCUR1,MECR,MED15,MRI1,MS4A2,MSL1,MTAP,MTF2,NAA40,PACSIN2,PIPOX,PNMA1,PQLC2,QPCTL,RGS12,TCF19,TNFSF10,TRIP6,VLDLR,VSTM4,WDR46,ZNF280D,ZNF674
LOXL2		enzyme				0.00128	IVL,PECAM1,SNAI1
CCDC80		other				0.00128	BCLAF1,CEBPA,LEP	92 (7)
intralipid		chemical drug				0.00128	FOS,LHB,PENK
oleoylethanolamide		chemical - endogenous mammalian				0.00128	FOS,OXT,SLC27A1	143 (12)
cordycepin		chemical drug				0.00128	FOS,IL10,MYC	183 (17)
miR-3166 (miRNAs w/seed GCAGACA)		mature microrna		1.372	bias	0.00129	ABI3,ACSL1,ALKBH5,ARL4A,ARSA,ATP2B2,BTG2,CDC23,CEP44,DUSP1,EXOSC2,FAIM,FAM57A,GRHL2,GYS1,HOXD8,INTS7,KIF1B,KIF3A,LRRC20,LRRFIP1,LUZP1,MAN1A1,MEF2C,MRPS23,MTCH2,MTF2,OSBPL10,PARP9,PCSK1,PDE4DIP,PEG3,PTHLH,TCEB3,TIA1,TMEM39A,TPP1,UBE2F,UBTF,USP37,WIPF2,ZMAT3
miR-149-5p (miRNAs w/seed CUGGCUC)		mature microrna		1.619	bias	0.00129	AAK1,ADGRF2,AREL1,ARSA,ATRN,BTG2,CEP44,COMMD9,CRY2,CYP1A1,DTX4,DYNC2LI1,ENC1,FBXW4,FLT1,GLDN,HNMT,HYAL1,ID4,IFNG,KDR,KHK,KIF1B,L3MBTL3,LMCD1,LRRC20,MAFF,MED15,MSC,NFIB,NSD1,PGF,PIPOX,PLEKHA8,POLR3A,PSD3,PTPRK,PXK,S100PBP,SLC11A2,SLC19A2,SLC25A22,SLC27A1,SMC4,SOCS6,SPTLC2,STARD8,TCAP,TCEB3,TCF19,TMEM165,TMEM86A,TOR1A,TPP1,UBE2F
miR-653-5p (miRNAs w/seed UGUUGAA)		mature microrna		1.228	bias	0.00131	AAK1,ADGRF2,ANTXR2,ATP2B2,ATRN,CALML4,CBL,DNAJB9,GLRX,MAT2B,MID1,NFIA,NFIB,NNT,NSMCE4A,PARP11,PARP9,PGM3,PTPRG,RNLS,SARAF,SHE,TMCC3,TMEM19,TMEM39A,TTC9,UBE2F,UBTF,YLPM1
miR-1255b-5p (and other miRNAs w/seed GGAUGAG)		mature microrna		0.95	bias	0.00131	ADAMTS3,ALDOB,ALKBH5,ATF6B,CEP44,CXCL12,CYGB,CYP19A1,DLX2,DTX4,FAM155B,FAM57A,FXYD6,GHRHR,HN1,HNMT,HTRA3,ITGA2,KIF1B,LRRFIP1,METTL21A,MID1,PARP9,PHLDA2,PLBD2,RAMP2,S100B,SLC2A3,STIM1
prostaglandin E1		chemical - endogenous mammalian		1.131		0.00132	FOS,IFNG,IL10,MYC	290 (24)
KISS1		other		0.895		0.00132	FOS,LHB,RCAN1,TMEM144	173 (14)
fumonisin B1		chemical toxicant		-0.655		0.00132	CYP1A1,IFNG,LTB,TNFSF10	213 (14)
1-(carboxymethylthio)tetradecane		chemical drug		-1		0.00132	APOA4,DECR1,RXRA,SLC27A1	99 (7)
PCSK1	10.24	peptidase				0.00132	IFNG,IGF1,IL10,LEP	205 (22)
miR-3675-5p (miRNAs w/seed AUGGGGC)		mature microrna	Activated	2.388	bias	0.00132	A1CF,AAK1,AMER3,CAPG,CNP,CXCL12,CXCL13,CYFIP2,CYP19A1,DCP1A,EXOSC2,FAM122A,FAM155B,GPAT3,HLCS,IGF1R,IGSF1,IRF6,KDR,KIF1B,KIF3A,MAF,METAP1,NR2C1,NSD1,PATL1,PIK3C2B,RNLS,RUNDC3A,SLC25A22,STAMBP,TBC1D8,TEX2,TMEM201,TMEM86A,TNFSF10,TRH,TRIM3,TRRAP,ZFX
testosterone		chemical - endogenous mammalian		-0.056		0.00132	ACSL1,AMD1,ANPEP,CAST,CYP19A1,EIF2S1,FAS,FOS,GADD45A,IFNG,IGF1,IGF1R,LEP,LHB,MYOD1,PLAU,PRKCZ,STAR,TMEM144,TOP2A	240 (23)
CSF1		cytokine		0.14		0.00134	CBL,CEBPA,DUSP1,FAS,FOS,IFNG,IGF1,IGF1R,IL10,MYC,PIK3R2,PLAU,VEGFA	197 (22)
miR-1263 (miRNAs w/seed UGGUACC)		mature microrna		1.348	bias	0.00135	A1CF,ADAMTS3,AP1M1,BCLAF1,CACYBP,CLK3,CXCL14,CYFIP2,FAM134A,GPAM,HCFC2,INTS10,ISOC1,KDR,LAMC2,MAMDC2,MAT2A,MYCBP,NSD1,PGM3,SLC2A1,STEAP4,THOC2,ZCCHC10,ZMAT3,ZNHIT6
miR-592 (and other miRNAs w/seed UGUGUCA)		mature microrna		0.069	bias	0.00135	CP,CRYZL1,CXADR,FCGR1A,IGF1,KATNAL1,KLF1,KLF11,L3MBTL3,METAP1,MSC,MYCBP,NFIA,NNT,PHLDB2,PRELID2,PTHLH,QSOX1,RHPN2,RNF128,TJP2,TMEM39A,TNFSF10,VSTM4,WLS,ZBTB7A
POMC		other		1.419		0.00135	DUSP1,FOS,GAPDH,IFNG,IL10,LEP,NR4A3,STAR,TRH	172 (20)
desmopressin		biologic drug		0.492		0.00135	ADM,ALB,ANK3,CAPG,FOS,GAPDH,HSPH1,PHLDB2,TJP2	124 (10)
miR-630 (miRNAs w/seed GUAUUCU)		mature microrna	Activated	2.034	bias	0.00137	CACYBP,CDC23,CEP44,EXO1,GPAM,HNMT,KATNAL1,LRIG3,MFSD6L,NDUFA5,PGM3,PPP6R2,PRSS12,STBD1,TBC1D32,TMEM165,TMX4,TP53RK,ZFP1,ZMAT3
FGF21		growth factor		0.598		0.00137	CIDEA,DIO2,FASN,IGF1,LEP,SLC2A1	222 (21)
folic acid		chemical - endogenous mammalian		0.3		0.00137	DNMT1,HDAC4,HOXA1,PECAM1,PTHLH,TYMS	81 (7)
THPO		cytokine		0.246		0.00137	CCNA2,CEBPA,FOS,KDR,MYC,VEGFA	226 (23)
miR-4650-5p (miRNAs w/seed CAGGCCU)		mature microrna		1.953	bias	0.00138	A1CF,ACSL1,ASB13,BRF2,CAMK2N2,CDH5,CELF2,DKC1,ENPP1,ERO1A,FBXO41,FCRL5,GLT8D1,GRHL2,HILPDA,HRH1,IDE,IKBKG,KCNE3,KCTD11,LEP,LPGAT1,LRRC20,MAF,MAFF,METRNL,MRPS23,MS4A2,NR1I2,PEX3,PLSCR1,PNMA1,POLR1D,POLR3A,PQLC1,PRELID2,PRSS12,RASSF1,RBFA,RGS12,RNF40,S100B,SCAMP5,SCARA5,SLC25A22,STARD8,TOR1AIP2,TPCN2,VASH1
mir-8		microrna		0.42	bias	0.00139	CBL,E2F3,HDAC4,IFNG,KDR,PTHLH,ROCK2
PPARGC1A		transcription regulator		-0.378	bias	0.00141	ABCB11,APOA4,BNIP3,CIDEA,CYP1A1,DIO2,DLAT,FASN,IL10,RXRA,SLC25A20,SOCS1,VEGFA	143 (16)
BMP2		growth factor		-1.457		0.00144	BHLHE40,CXCL12,CYP19A1,DLX2,FOS,ID4,IFI16,MEF2C,MYC,NFYC,RET,TAC1,TOB1,VEGFA	245 (20)
miR-4273 (and other miRNAs w/seed UGUUCUC)		mature microrna		1.686	bias	0.00145	AKAP12,AMD1,ARHGDIB,ARID2,CRNKL1,DNAJC15,EIF2S1,EYA3,ITGB8,NFIB,NOLC1,NR4A3,NRCAM,PALLD,PARP9,PGM3,SLC11A2,SOCS6,STAMBP,TMEM144,TP53RK,VLDLR,ZFP1,ZNF322,ZNF395
miR-548u (and other miRNAs w/seed AAAGACU)		mature microrna	Activated	2.227	bias	0.00147	ACSL5,CDC27,CLK3,CXCL12,DICER1,HSPH1,ITGA2,LGMN,LGR4,LPAR6,METTL21A,NIP7,NR2F2,OSBPL8,PGM3,SARAF,SYCP3,TBC1D32,TBPL1,TFDP1
miR-1291 (and other miRNAs w/seed GGCCCUG)		mature microrna		1.462	bias	0.00149	AK3,ANPEP,AP1M1,ARHGDIB,ARL4C,ATRN,CCDC3,CDS2,CERCAM,CNP,COL6A1,COMMD9,CRY2,CXCL12,CYP1A1,EIF4EBP1,EMB,FAM134A,FBXO41,FCRL5,GCLM,GLRX,GLYR1,KIAA1644,KIF1B,KLRC4-KLRK1/KLRK1,LEP,LFNG,LGR4,LRTOMT,MAP3K9,MECR,MGMT,MRI1,MTAP,MXD4,MYO19,NAT9,NSD1,OAZ2,ODF2L,PATL1,PCP4L1,PGF,PLBD2,PODNL1,PTHLH,PTOV1,RALGDS,RASSF1,RHPN2,RNF128,SLC16A3,SLC1A1,SLC25A22,SLC2A1,SLC6A3,SRSF6,STAR,TCF19,THOC2,TMEM201,TMEM248,…
SFTPA1		transporter		-1.3		0.0015	AMOT,ANPEP,FAM183A,FOS,HBEGF,IL10,MYC,TCEA3	228 (22)
E. coli B4 lipopolysaccharide		chemical toxicant		-1.878		0.00151	ABCB11,CALML4,CLEC14A,CRADD,EMB,FAS,FCGR1A,IFI16,IFI35,IFIT3,IFITM3,IFNG,IL10,LRRFIP1,PARP9,RPS25,SOCS1,TNFSF10	182 (20)
ANGPT2		growth factor		0.794		0.00151	ARL4C,CDC27,CWC22,FAS,HDAC4,HSPA4,LEP,MGMT,MYOD1,PLAU,PTHLH,RCAN1,SNAI1,TOR1AIP2	217 (15)
miR-31-5p (and other miRNAs w/seed GGCAAGA)		mature microrna	Activated	3.379	bias	0.00151	A1CF,ADM5,ASB13,CACYBP,CBL,CD3E,CDC23,CEBPA,CLDN2,CNP,CXCL12,CYYR1,DICER1,FAM122A,FAM155B,FCGR1A,GCLM,HBEGF,IDE,INTS6,KIF1B,MYCBP,MYO19,NCK2,NSFL1C,PDE4DIP,PHF12,PPP1R7,PRELID2,PSD3,RASA1,RET,SCARA5,SESN2,SMC4,SPRED1,SRSF11,TIA1,TJP2,TMX4,TSHZ2,VGLL3,VSTM4,YLPM1,ZNHIT6
miR-378g (miRNAs w/seed CUGGGCU)		mature microrna	Activated	2.616	bias	0.00153	AAK1,ADAM19,ADM5,ANK3,ANKS3,BUB3,CAMK2N2,CCDC3,CDH3,CDH5,CDS2,COMMD9,CXCL12,DBNDD1,DESI2,DNAJC21,FAM183A,FAM65B,FBXL20,FLT1,FXYD6,GINS4,GLYR1,GPR39,GRHL2,HCFC2,HR,HSPA4,HTRA3,IRF6,KIF1B,KLRC4-KLRK1/KLRK1,LYRM4,MAFF,MCUR1,MRI1,MXRA5,MYBPC1,NANP,NGB,PNPLA3,PODNL1,POLR3A,PPP6R2,RASSF1,RNF40,S1PR5,SCAMP5,SLC25A20,SLC25A22,SRGAP1,TMCC3,TPCN2,TPST1,UBTF,ZNF322,ZNF395
miR-3157-3p (miRNAs w/seed UGCCCUA)		mature microrna	Activated	3.613	bias	0.00153	ADAR,B3GALNT1,BUB3,CDC23,CSTF1,DDX42,DENND4B,ENOPH1,GAS7,INTS6,LPGAT1,LTN1,MTAP,NANP,NAT9,NEK2,NOL6,PCP4L1,PDE4DIP,PECAM1,PEX3,PITRM1,PTHLH,TCEB3,TCF19,TMTC4,VGLL3,WIPF2,ZCCHC10,ZMAT3,ZNF32
miR-4786-5p (miRNAs w/seed GAGACCA)		mature microrna		1.521	bias	0.00154	AHCTF1,ANKRD10,ARL4A,ATP2B2,BTG2,CADM2,CD2,CEP44,COMMD9,CYP1A1,DIO2,DNAJC21,EHF,EMB,ENC1,ENSA,IGSF1,KCNE3,KIAA1324,LRTOMT,MCUR1,MSL1,NAA40,NGB,PCSK2,PPP1R13L,QSOX1,RASSF1,SAR1B,SHE,SLC11A2,SPTLC2,SS18,TCEB3,TMEM86A,TMX4,TOR1AIP2,TXNDC15,USP37,ZNHIT6
miR-3606-5p (miRNAs w/seed UAGUGAA)		mature microrna		1.472	bias	0.00154	ABHD17C,AKAP12,CCP110,CD93,CDS2,DNAJB9,DNAJC21,DPT,ERO1A,GPATCH2,ID4,IDE,IGSF1,INTS6,LRPPRC,NR2C1,NSFL1C,NUDT5,OAZ2,PGM3,PLAU,PLEKHA8,TIPIN,TOR1AIP2,ZMAT3
cadmium chloride		chemical toxicant		1.41		0.00155	ALB,ANXA5,FOS,GADD45A,MYC,PLAU	224 (22)
HDAC2		transcription regulator		1.219		0.00156	DPT,FAS,IGF1,ITGB8,MYC,NASP,PLAU,POLD2,RRM2B,TNFSF10	146 (7)
SRC		kinase		0.031		0.00156	CBL,CYP1A1,DUSP1,FOS,IGF1R,LHB,MYC,MYOD1,PLAU,VEGFA	210 (19)
TNFSF11		cytokine		-0.025	bias	0.00157	CEBPA,CYP1A1,DUSP1,FOS,IFNG,IGF1,IL10,MYC,NEK2,NFIL3,RALGDS,SOCS1,VRK1	210 (25)
miR-4534 (and other miRNAs w/seed GAUGGAG)		mature microrna		1.833	bias	0.00158	ARHGDIB,B3GALNT1,CD2,CLDN2,CXADR,ENC1,FADS6,FAF2,FAM155B,GCLM,GLT8D1,IFIT3,INTS6,LPAR6,MID1,MSL1,MSL3,NAA40,NR2F2,PIPOX,PLAU,PQLC1,PRELID2,QPCTL,RBL1,RET,S100B,SLC35F2,STAR,TMEM19,TMEM201,TNFSF13,TPP1,VASH1
NRG1		other	Activated	2.172		0.00158	COL6A3,IL10,PLAU,PYGM,S100B,SLC1A1,SLC2A1,SLC2A3,VEGFA	201 (23)
miR-892b (miRNAs w/seed ACUGGCU)		mature microrna	Activated	3.443	bias	0.00159	ADPRHL2,AK3,ANK3,AREL1,ATP1B3,CADM2,CELF2,CEP70,CYYR1,DNAJB9,EHF,FAF2,FLT1,GLRX,GLYR1,HYAL1,IDE,IFIT2,IGSF1,KIF1B,L3MBTL3,MAN1A1,NR2C1,NSD1,PLEKHA8,PTP4A2,PXK,RGS2,SF3B1,SLC11A2,SLC35D2,SMC4,SOCS6,SS18,TCEB3,TCF21,TIA1,TMEM165,TRAPPC13
miR-758-3p (and other miRNAs w/seed UUGUGAC)		mature microrna		1.362	bias	0.00159	A1CF,ADGRF2,ANKRD10,ANKRD46,ANTXR2,ATP2B2,COMMD9,FBXL20,HBEGF,HNMT,ITGA6,KIF3A,MCAT,MID1,MRPS23,MS4A2,MYCBP,NDUFAF6,NPHS2,PARP9,PPP1R7,SCARA5,SPTLC2,TIA1,TOR1AIP2,TRAPPC13,TSHZ2,TTC9,ZBTB7A
miR-4738-3p (miRNAs w/seed GAAACUG)		mature microrna		1.659	bias	0.00159	CADM1,CXADR,FGF18,FPGT,KIAA1644,KIF3A,MAN1A1,METTL21A,MSL3,NFIL3,PBRM1,PIPOX,PLAU,PLEKHA8,RRS1,S100PBP,SMC4,SPRED1,SRSF11,TOR1AIP2,TXNDC15,ZMAT3
dimethyl sulfoxide		chemical drug		1.211		0.00163	BNIP3,CYP1A1,FOS,MEF2C,MYC,NR2F2,STAR,VLDLR	215 (24)
BTNL2		transmembrane receptor		0.707		0.00163	ACSBG1,EMB,IFITM3,IFNG,NCOA7,RALGDS,RRAGD,TNFSF10
dinoprost		chemical - endogenous mammalian		0.161		0.00163	ADM,CYP19A1,FOS,HSPA4,MYC,NFIL3,STAR,VEGFA	211 (22)
eicosapentenoic acid		chemical drug		-0.168		0.00163	CIDEA,FADS1,FOS,IGF1,IL10,LEP,SLC25A20,SLC2A1	233 (24)
mir-22		microrna		0.152	bias	0.00165	BMPR1B,HDAC4,MYCBP,RGS2
lisinopril		biologic drug		0		0.00165	CAST,FOS,KDR,VEGFA	136 (12)
NFASC		other		-1.067	bias	0.00165	ANK3,GLDN,KIF1B,NRCAM
EIF4EBP1	1.89	translation regulator				0.00165	CEBPA,LEP,SLC2A1,SOCS1	132 (7)
BACH1		transcription regulator				0.00165	DNAJC7,EWSR1,GCLM,HBB
hydrocortisone		chemical - endogenous mammalian		1.158		0.00166	ALOX15,BCLAF1,CEBPA,CYP19A1,FAS,GLUL,IGF1,IL10,ITGA2,IVL,NOTCH4	253 (21)
miR-2861 (and other miRNAs w/seed GGGCCUG)		mature microrna	Activated	3.975	bias	0.00166	A1CF,AAK1,ADGRF2,AIFM2,AK3,ANKRD10,ANKS3,ARSA,ATRN,B3GALNT1,CALML4,CEP44,CLN6,CNP,COMMD9,CRY2,DIO2,DLX2,DPF2,EMB,FADS1,FBXO41,FBXO9,FXYD6,GAS7,GRHL2,HBEGF,HDAC4,HR,HTR1D,IFIT3,INTS6,KHK,LAMC2,LRP1,LRTOMT,LUZP1,MID1,MTHFD1,MXD4,MYBPC1,NAA50,NOTCH4,NR2F2,NT5DC1,OAZ2,PBRM1,PHACTR1,PLLP,RGS12,RHPN2,RNF40,S100PBP,SCAMP5,SLC3A2,SLCO2B1,SNAPC5,STAR,STARD10,STARD8,TIGD2,TMEM144,TMEM201,TMEM86A,TSPAN17,TS…
miR-4695-5p (and other miRNAs w/seed AGGAGGC)		mature microrna	Activated	2.922	bias	0.00166	ACSL5,ADAM19,AKAP12,ALOX15,ANK3,BTG2,CEBPA,DPF2,DTX3L,ENOPH1,FAM134A,FBXO41,FBXW4,GPX6,HN1,HTRA3,IDE,IGF1,IGF1R,ISOC1,KATNAL1,KIAA1324,LEP,LETM1,LPAR3,LRP1,LTN1,MACF1,MAN1A1,MAT2B,MYCBP,NANP,NCOA7,NEK2,NNT,NSD1,PFKFB3,PHYHD1,PIGC,PLBD2,PLEKHA8,PPP6R2,PYGM,RASSF1,RBFA,S100PBP,SCAMP5,SESN2,SLC27A1,TEX2,TMEM86A,TSTD2,UBE2F,WIPI1,ZER1,ZFP1
EDN1		cytokine		1.517	bias	0.00167	ADAM19,ANXA5,FOS,HBEGF,ITGA2,IVL,LEP,MYC,PLAU,PLOD1,SLC2A1,SOCS1,UBTF,VEGFA	216 (22)
miR-1229-3p (miRNAs w/seed UCUCACC)		mature microrna	Activated	2.356	bias	0.00169	AK3,AP1M1,CADM1,CBL,CEP44,DIO2,ENSA,FAM107B,FAM155B,FBXO9,GPAT3,HLCS,HTR1D,ITGB8,LPGAT1,LTN1,MAP4K4,MED15,NAA50,PLOD1,PPP1R3B,PRSS12,RCAN1,RRAGD,SLC11A2,SLC25A20,SPHK1,SRSF6,THOC2,TNFSF10,WDR81,WIPF2,ZNF322
HOXC8		transcription regulator		1.342		0.0017	ADAM19,EMB,GAS1,KRT19,SLC16A3
MYOG		transcription regulator		0		0.0017	FOS,IFI16,MYF6,MYOD1,S100B
F3		transmembrane receptor				0.0017	F2,IFNG,IL10,PAPOLA,VEGFA	154 (19)
TG		other				0.0017	CEBPA,IFNG,IL10,KLF1,TRH	202 (15)
miR-4756-3p (miRNAs w/seed CAGAGAU)		mature microrna	Activated	2.695	bias	0.0017	ACSL1,APITD1/APITD1-CORT,ARID2,CCP110,DICER1,DYNC2LI1,EHF,EXO1,HCFC2,KCNE3,LPCAT1,LRTOMT,MAN1A1,MYOD1,NFIB,PCP4L1,PKIG,PLSCR1,SAMD8,SOCS4,TAC1,TMTC4,UBE2F,WDR93
miR-125a-3p (miRNAs w/seed CAGGUGA)		mature microrna		0.998	bias	0.00171	ADGRF2,ATAD2B,CAST,CBL,COL6A1,DYNC2LI1,E2F3,EXOSC2,FADS6,FAM162B,FCRL5,FXYD6,FYN,GCLM,GJA4,HILPDA,HNMT,IFIT2,IGSF1,IL10,KCTD11,LPCAT1,MAP3K9,MECR,METTL21A,MTAP,NAA40,NAA50,NT5DC1,PGM3,PNPLA3,PPP1R3B,PPP6R2,RMI2,ROCK2,SAR1B,SCARA5,STAMBP,STAR,TOR1AIP2,TTLL12,USP37,WDR46,ZFYVE1
paclitaxel		chemical drug		0		0.00173	BHLHE40,CDA,CRY2,EEF1E1,HBEGF,IFNG,IL10,ITGA6,LHB,MACF1,MYC,NAT9,PLAU,SLC25A20,SLC2A3,SPTLC2,VASH1	190 (26)
miR-2115-5p (miRNAs w/seed GCUUCCA)		mature microrna	Activated	3.091	bias	0.00174	AMER3,CADM2,CALML4,CCDC3,CP,DDX42,DNAJC21,DTX3L,FAM122A,FAM57A,FBXL20,KLRC4-KLRK1/KLRK1,LEP,LPGAT1,LTN1,LUZP1,MAB21L3,MCCC1,NASP,NDUFAF6,NFIA,NFIB,PGM3,PIGC,PIP4K2A,PLLP,POLR3A,PRELID2,PSD3,RNLS,SESN1,SLC25A22,SLC2A3,SPRED1,STAMBP,TNFSF13,WDR33,WWP2,ZER1
miR-548aa (and other miRNAs w/seed AAAACCA)		mature microrna		1.514	bias	0.00174	ABHD17C,ANKRD44,ARID2,CCNA2,CCT6A,CDK5R1,CEBPA,FAM107B,FAM134A,FAM162B,FAM171B,FBXO41,GLT8D1,HOXD8,INTS6,KIF1B,KLF11,LRRC8C,MACF1,MAP4K4,MSL3,MYF6,NASP,NEK2,NRCAM,PAPOLA,PARP11,PSD3,RET,TRAPPC13,TSTD2
miR-1236-3p (miRNAs w/seed CUCUUCC)		mature microrna		0.905	bias	0.00175	ADAR,ANTXR2,BHLHE40,CDC27,CELF2,CRY2,CSRP2,CYFIP2,DNAJC21,FADS1,FAF2,GAPDH,GPAT3,GPATCH4,IL10,IVL,KDR,KLRC4-KLRK1/KLRK1,MAP10,METAP1,MYCBP,MYO19,NAA40,NR2F2,NSD1,OAZ2,PCSK2,PEG3,PEX3,PITRM1,POLR3A,QPCTL,RRAGD,S100PBP,STEAP4,TJP2,TPCN2,TSPAN9,UBTF,VEGFA
RBPJ		transcription regulator		-0.283		0.00176	CXCL12,DUSP1,FGF18,FOS,HOXD3,IGF1,INHA,LFNG,MYC,PGF,VEGFA	171 (21)
IL7		cytokine		-0.373		0.00176	CD2,CD247,FAS,IFNG,KLRC4-KLRK1/KLRK1,LTB,MAF,MYC,SLC2A1,SOCS1,TNFSF10	207 (19)
miR-3937 (miRNAs w/seed CAGGCGG)		mature microrna		1.995	bias	0.00178	AIFM2,BMPR1B,CACYBP,CDK5R1,CYTH2,EIF4G1,FAF2,GYS1,HN1,HOXD8,HTRA3,ID4,IDE,IGF1R,IKBKG,LGI4,LRTOMT,MS4A2,NCAPG,NEK2,PECAM1,PIPOX,SORBS2,STAR,TCEB3,TPST1,TSPAN17,TSTD2
miR-4733-5p (miRNAs w/seed AUCCCAA)		mature microrna		1.297	bias	0.00178	ADGRA3,ANTXR2,CAST,CDH5,DDX42,EGLN1,EHF,ENSA,FAF2,FAM122A,GSS,HELLS,IGF1,IGF1R,LAMC2,LPGAT1,MSL1,NAA50,NFIA,NOLC1,ODF2L,PALLD,PDE4DIP,PECAM1,PTHLH,SAR1B,SMOX,TP53RK
histamine		chemical - endogenous mammalian		1.621		0.00178	FOS,HBEGF,IFNG,IL10,LEP,OXT,PENK,STIM1	198 (23)
EGR1		transcription regulator		0.82		0.00178	CDK5R1,FAS,FLT1,GADD45A,IGF1R,LHB,PCSK2,PLAU,SNAI1,SOCS1,TNFSF10,VEGFA	197 (21)
miR-448-3p (and other miRNAs w/seed UGCAUAU)		mature microrna		1.956	bias	0.00179	ABHD5,ADAM19,AMOT,ANK3,ANKRD10,ANKRD46,ARL4A,ATAD2B,ATP2B2,CADM2,CXADR,CXCL12,DDIT4,DESI2,E2F3,FAS,FLRT2,FLT1,HCFC2,IGF1R,LTN1,MAF,MEF2C,MTF2,MYCBP,NAA50,NEK2,NFIA,NFIB,NIP7,NR4A3,PALLD,PLSCR1,PRKCZ,PSD3,RBFA,ROCK2,SAR1B,SF3B1,SNAI1,SORBS2,SPRED1,SRSF11,SS18,WWP1,ZBTB7A,ZFP1,ZNHIT6
miR-10a-5p (and other miRNAs w/seed ACCCUGU)		mature microrna	Activated	2.298	bias	0.00179	AAK1,ANK3,BMPR1B,CADM2,CELF2,CEP44,CNP,CRADD,DKC1,DPF2,DTX3L,E2F3,EDEM1,FLRT2,FLT1,GINS4,HDAC4,HOXA1,ID4,IGSF1,ITGB8,KCTD11,KLF11,L3MBTL3,LRRC8C,LRRFIP1,MAP4K4,MSL3,MTF2,MYCBP,NR2F2,NR4A3,PATL1,PTP4A2,TMEM19,TPCN2,VASH1,WDR26
miR-3681-5p (and other miRNAs w/seed AGUGGAU)		mature microrna	Activated	2.059	bias	0.0018	ADGRF2,AMOT,BMPR1B,CAST,DCP1A,DESI2,EIF2S1,FADS1,FBXL20,HEATR5A,LPAR6,LRRC8C,MACF1,MAP10,MID1,PATL1,PIP4K2A,RCAN3,S1PR3,TNFSF10,TOP2A
miR-2909 (miRNAs w/seed UUAGGGC)		mature microrna	Activated	2.624	bias	0.00182	ANPEP,B3GALNT1,CADM1,CD247,DLAT,EGLN1,ENOPH1,ERO1A,MAT2A,MCAT,MTF2,NAA50,NRCAM,PBRM1,PIP4K2A,PLBD2,S100PBP,S1PR3,S1PR5,SARAF,SOCS4,SPTLC2,TBC1D8,TSHZ2,VWDE,ZNF322
miR-1207-3p (and other miRNAs w/seed CAGCUGG)		mature microrna		0.715	bias	0.00182	ABCB11,ABI3,ADM5,ADPRHL2,AIFM2,AQP11,AREL1,BNC1,CALML4,CCDC3,CCNA2,CDS2,CLDN2,COMMD9,CRY2,CYGB,DDIT4,EGLN1,EXOSC2,FAM193B,FLT1,GGA2,IDE,LAMC2,LPCAT3,LRRC20,LRRC8C,LUZP1,MTF2,MXD4,NAA40,NR4A3,PARP11,PATL1,PGF,POLR3A,RALGDS,SERPINB11,SLC35F2,SMIM11A,SPHK1,SRGAP1,STARD8,STEAP4
miR-3915 (miRNAs w/seed UGAGGAA)		mature microrna		1.41	bias	0.00182	ADAR,CALML4,CBL,CCDC3,CRNKL1,DCP1A,DKC1,DPF2,EGLN1,ENSA,ERO1A,FAM122A,FBXO9,FCRL5,GRHL2,GSE1,HYAL1,IDE,IRF6,LFNG,MTAP,MTCH2,NPHS2,NRCAM,NSD1,OSBPL10,POU1F1,SLC25A22,TJP2,TOR1A,TOR1AIP2,TP53RK,TPP1,YLPM1,ZNF630,ZNHIT6
miR-1267 (miRNAs w/seed CUGUUGA)		mature microrna		1.805	bias	0.00182	ABI3,ATP1B3,BNIP3,CALML4,CP,CXCL12,DCP1A,DIO2,GRHL2,HEATR1,HTR1D,ITGA2,ITGA6,KCNE3,LAMC2,NRCAM,PDE4DIP,PEX3,ROCK2,TCF19,VGLL3,ZFYVE1
miR-4279 (miRNAs w/seed UCUCCUC)		mature microrna		1.341	bias	0.00183	ADM,ALDOB,COG8,CRNKL1,CXCL13,DICER1,DIO2,DKC1,DTX4,DUSP1,FAM155B,FGG,FOS,FPGT,GINS4,GRHL2,GTF2F2,ITGB8,KCTD11,KIF1B,KLF11,MXRA5,NOL6,PALLD,PARP9,PTP4A2,RNLS,RXRA,SAMD8,SCARA5,SLC25A20,SPRED1,TBC1D32,TCF21,TYMS,VEGFA,VGLL3,WBP2,WDR33,ZFX
mir-1		microrna		1.268	bias	0.00184	ADAR,ADPGK,EML4,HDAC4,IGF1,IGF1R,MYOD1,RASA1,VEGFA
miR-4280 (miRNAs w/seed AGUGUAG)		mature microrna	Activated	2.103	bias	0.00185	ADAMTS3,BCLAF1,CBL,CYP1A1,ENPP1,FAM155B,FLRT2,FLT1,GLRX,LOC102724159/PWP2,LYRM4,NDUFAF6,ODF2L,PLSCR1,TCEB3,TNFSF10,USP37,WDR33,ZNF280D
miR-4705 (and other miRNAs w/seed CAAUCAC)		mature microrna	Activated	2.096	bias	0.00187	ABHD6,AHCTF1,BMPR1B,CD2,CLEC14A,CXCL12,DNAJC21,DTX3L,DYNC2LI1,GLUL,HRH1,MAP3K9,MTF2,NFIB,ODF2L,PDE4DIP,PTPRR,RALGDS,S100B,SAMD8,SS18,TP53RK,UBE2F,ZNF280D
silibinin		chemical drug		1.237		0.00188	FLT1,IGF1R,MYC,PECAM1,PLAU,SNAI1,VEGFA	214 (19)
PTPN11		phosphatase		0.094		0.00188	CEBPA,FASN,FOS,IFNG,KDR,TAC1,ZMAT3	206 (19)
tyrphostin AG 1478		chemical - kinase inhibitor		-1.363	bias	0.00188	CYP19A1,FOS,HBEGF,PLAU,S1PR3,SLC2A1,SPHK1	213 (23)
miR-4264 (miRNAs w/seed CUCAGUC)		mature microrna		1.57	bias	0.00188	ATRN,DLX2,EEF1E1,EXOSC2,FAF2,FAM134A,FAM171B,FCGR1A,HELLS,IRF6,MID1,MSL1,NEK2,NOLC1,PKIG,PLEKHA8,PTPRG,RRM2B,SAMD8,SCARA5,SLC27A1,STARD8,STEAP4,TCF19,TMEM248,TOR1AIP2,TSHZ2,VLDLR
L-threonine		chemical - endogenous mammalian				0.00188	ALB,EIF2S1,MYC
bevacizumab		biologic drug				0.00188	CXCL12,KDR,PGF	150 (12)
AFF4		transcription regulator				0.00188	ANKRD37,MYC,SRSF6
PTP4A3		phosphatase				0.00188	IGF1R,LEO1,MYC	191 (14)
IL4I1		enzyme				0.00188	CD247,IFNG,TOB1
astressin 2B		biologic drug				0.00188	FOS,SLC2A1,SLC2A3	168 (13)
Z-DEVD-FMK		chemical - protease inhibitor				0.00188	CD247,MEF2C,SPHK1
irinotecan		chemical drug				0.00188	FAS,IFNG,TYMS	135 (14)
miR-217-5p (and other miRNAs w/seed ACUGCAU)		mature microrna	Activated	2.913	bias	0.00188	AAK1,AK3,ANK3,ARID2,ARL4A,ATRN,B3GALNT1,BAG3,BCLAF1,CDS2,CELF2,CXCL14,E2F3,FAF2,FASN,FPGT,GRHL2,HELLS,HSPA4L,KIAA1324,LPGAT1,MACF1,MAF,MAMDC2,MEF2C,MS4A2,MYO19,NCOA7,NFIA,NT5DC1,RCAN1,SLC19A2,SLC6A3,SMC4,SRSF11,TIA1,TJP2,TMTC4,USP37,VGLL3,ZMAT3
CD44		enzyme		-0.045		0.00188	CDH5,CIDEA,CXADR,DNMT1,EMILIN1,FAS,FASN,GADD45A,IFNG,IL10,PLAU,WBP2	231 (26)
NR1H4		ligand-dependent nuclear receptor		-0.95		0.00188	ABCB11,ABHD5,AMBP,CEBPA,CYP19A1,FASN,GCLM,IFNG,MYC,NR1I2,PNPLA3,RXRA	188 (24)
miR-3714 (miRNAs w/seed AAGGCAG)		mature microrna		0.401	bias	0.00189	ACSL1,ANTXR2,ANXA5,AQP11,ATP2B2,BBIP1,BCLAF1,BMPR1B,BTG2,CBL,CCDC3,CYTH2,EMB,FLT1,GAS1,GLT8D1,GSS,HEATR1,HEATR5A,HN1,HR,HRH1,KIF1B,LRIG3,MACF1,MCUR1,MTCH2,NR4A3,PAPOLA,PHACTR1,PPP1R13L,PPP6R2,PTHLH,RNLS,S100PBP,SLC11A2,SLC3A2,SMOX,TMCC3,TPCN2,TPP1,WIPF2
miR-362-5p (and other miRNAs w/seed AUCCUUG)		mature microrna		1.955	bias	0.0019	ABHD5,ANK3,ARL4A,CDC27,FCER1A,HNMT,NIP7,PEX12,PIK3C2B,PTHLH,RNLS,ROCK2,S100PBP,SLC11A2,TMCC3,TP53RK,VGLL3,VSTM4,WAS,WIPF2
miR-3189-5p (miRNAs w/seed GCCCCAU)		mature microrna		1.899	bias	0.00193	A1CF,AKAP12,ANKS3,AREL1,ATF6B,CELF2,CXCL13,CYGB,DUSP1,EDEM1,EYA3,FAM122A,FAM134A,FAM155B,FLT1,GAS7,GRHL2,HTRA3,IGF1R,INTS6,KCTD11,LPCAT1,MACF1,MAFF,MGMT,MSL3,NAA50,NGB,NRCAM,OAF,OAZ2,PLBD2,PQLC1,PRSS12,QSOX1,RBL1,RGS12,RXRA,SLC35D2,TBC1D8,TCF19,TMCC3,TMEM201,TOR1AIP2,TRUB2,TSHZ2,TSPAN17,TSPAN9,UBTF,WDR33
butyric acid		chemical - endogenous mammalian		0.448		0.00193	ALB,ALOX15,CYP1A1,DUSP1,FASN,FOS,GADD45A,HBB,IL10,LEP,MYC,PLAU,SKP2	224 (22)
HMOX1		enzyme		1.274		0.00194	CXCL12,CYP1A1,FLT1,IFNG,IL10,KDR,VEGFA,ZFP36	175 (19)
BTK		kinase		0.277		0.00198	CBL,CCT6A,CD2,CEBPA,HELLS,IFI35,IFIT3,IFNG,IL10	189 (20)
honokiol		chemical - endogenous non-mammalian	Activated	2		0.00198	FLT1,FOS,IL10,KDR,SNAI1	220 (19)
NPY		other		0.588		0.00198	DIO2,FOS,IL10,LEP,TRH	164 (19)
CEACAM1		transporter		0.152		0.00198	IFNG,IGF1R,KDR,LEP,VEGFA	241 (19)
EBI3		cytokine		-0.497		0.00198	FOS,IFNG,IL10,MYC,TNFSF10	207 (20)
IL3		cytokine		0.686		0.00199	CD247,FAS,FASN,FCER1A,FOS,GADD45A,HBEGF,KIF1B,KLF1,MID1,MS4A2,MYC,SLC2A1,SLC2A3,SLC3A2,SOCS1,VEGFA,ZBTB7A	195 (19)
FSH		complex		0.022		0.00201	ADM,AKAP12,ARL4C,BTG2,CYFIP2,CYP19A1,DNAJB9,DUSP1,ENC1,FOS,ID4,IGF1R,INHA,MAP4K4,MYC,NPC2,PENK,RGS12,SLC2A1,STAR,TOB1,VEGFA	222 (21)
MAP4K4	1.59	kinase	Activated	2.538	bias	0.00203	ACSL5,CEBPA,DLAT,FASN,GLUL,GYS1,HYAL2,NDUFA5,PEX3,PNPLA3	69 (7)
MYOD1	-6.47	transcription regulator		-0.256		0.00204	ACSL5,DUSP1,FYN,GADD45A,HSPA4L,IFI16,IGF1,MEF2A,MEF2C,MSC,MYF6,MYOD1,SLC2A1	145 (11)
BHLHE40	1.7	transcription regulator		0.887		0.00204	FASN,IFNG,MEF2C,MYOD1
naloxone		chemical drug		0.047		0.00204	FOS,IL10,NR4A3,OXT	168 (19)
tripterine		chemical - endogenous non-mammalian		-1		0.00204	BAG3,DNAJB9,HSPA4L,HSPH1
RARRES2		transmembrane receptor		-1.969		0.00204	CCNA2,CYP19A1,FASN,LEP	156 (7)
puromycin		chemical - endogenous non-mammalian				0.00204	CYP1A1,GHRHR,UBTF,VEGFA
PPP1R15A		other				0.00204	CA9,CEBPA,EIF2S1,GADD45A
miR-4789-3p (miRNAs w/seed ACACAUA)		mature microrna		1.906	bias	0.00205	ANKRD44,CDK5R1,CDS2,DIO2,DLAT,ENC1,ENOPH1,ENPP1,FPGT,GCLM,HOXD3,ID4,KIF3A,LRRFIP1,MAP10,METAP1,MRI1,NANP,PARP9,PCSK2,PEG3,PTPRR,RASA1,RNLS,SLC11A2,SOCS6,STARD8,STBD1,TAMM41,VGLL3,WLS,ZFYVE1
miR-4742-5p (miRNAs w/seed CAGGCAA)		mature microrna	Activated	3.057	bias	0.00205	AHCTF1,AKIP1,AMER3,ANKRD46,ARL4A,ARSA,DBNDD1,DTX4,ENSA,EXO1,FAM162B,GINS4,GJA4,GLRX,GPAM,HNMT,IFIT2,LGMN,LRRC8C,MAT2B,MCAT,MS4A2,PARP11,PCSK1,PEX3,POLR3A,RMI2,SAMD8,SCAMP5,SIMC1,SLC2A1,SLC38A9,SORBS2,SPRED1,TEX2,TFDP1,THOC2,TP53RK
miR-4320 (miRNAs w/seed GGAUUCU)		mature microrna		1.983	bias	0.00205	ABHD5,ADAM19,AMER3,CALML4,CEP44,CSTF1,DIO2,DMBT1,GAS1,GLRX,GYS1,HLCS,KIF3A,LMCD1,MACF1,MSL1,MYCBP,NR2C1,PEG3,SCARA5,SOCS1,TMCC3,TOR1A,WDR33
fenretinide		chemical drug		0.87		0.00207	FYN,IGF1,LEP,MGMT,MYC,RXRA,VEGFA	186 (17)
clozapine		chemical drug		0.377		0.00207	ACAT2,CIDEA,FASN,FOS,IL10,NR4A3,TAC1	197 (24)
miR-196a-5p (and other miRNAs w/seed AGGUAGU)		mature microrna	Activated	2.411	bias	0.0021	AAK1,CELF2,CYP1A1,DNAJC21,DYNC2LI1,EYA3,FAS,GAS7,HOXD8,IGF1,KCNE3,LRIG3,LTN1,MAMDC2,NR2C1,NSD1,ODF2L,PFKFB3,PLEKHA8,PPP6R2,PRELID2,PRSS12,PTPRG,RET,S100B,SARAF,SLC25A22,SLC35D2,SOCS4,SPRED1,TBPL1,ZNF280D
miR-3198 (and other miRNAs w/seed UGGAGUC)		mature microrna		0.354	bias	0.0021	ADAR,CLDN2,CXCL14,DESI2,DLAT,FADS1,FADS6,FBXL20,HLCS,HOXD3,IDE,IFIT3,KLRC4-KLRK1/KLRK1,LFNG,LRTOMT,METTL21A,NAA40,NIP7,PCSK2,PFKP,PIK3R2,PLOD1,PRELID2,QPCTL,RALGDS,SDCBP2,STBD1,TMEM19,TMEM86A,TMX4,TP53RK,VSTM4,WIPF2,ZNHIT6
miR-3150b-3p (and other miRNAs w/seed GAGGAGA)		mature microrna	Activated	3.68	bias	0.00212	ADAM19,AMER3,ARID2,CD2,CD3E,CD93,CELF2,COL6A1,DLX2,EYA3,FAM122A,FBXO41,FBXO7,FPGT,GJA4,GPX6,IDE,IGF1,IGF1R,IGSF1,LFNG,LRRC20,LUZP1,MAP3K9,MECR,MTAP,NOLC1,OXT,PARP11,PARP9,PHF12,PLBD2,PLSCR1,PTP4A2,RASSF1,RNF40,SAMD8,SLC11A2,SOCS6,SRGAP1,TTC9,TTLL12,VSTM4,XPO7,ZFYVE1
MKNK1		kinase		0.333	bias	0.00213	ANXA5,BAG3,CP,FOS,HSPA4L,IFIT2,KIF1B,NR4A3,TPP1
clofibrate		chemical drug		0.137		0.00213	CDS2,CYP1A1,DECR1,FAS,GADD45A,MYC,NR2C1,SLC27A1,SLCO2B1	224 (19)
BCL2		transporter		-0.602		0.00213	BNIP3,DLAT,ENO2,FAS,FOS,IFNG,IL10,RBL1,SPHK1	201 (20)
miR-5096 (miRNAs w/seed UUUCACC)		mature microrna		1.101	bias	0.00215	ABHD17C,AHCTF1,AKAP9,CNP,FLT1,GADD45A,GINS4,GLDN,HEATR5A,ITGA2,LGR4,METTL21A,NOCT,NSFL1C,OXT,PCSK2,PGM3,RNLS,RRAGD,SLC26A3,SRGAP1,STAR,TAC1,ZFP1,ZNF322
miR-879-5p (and other miRNAs w/seed GAGGCUU)		mature microrna		1.55	bias	0.00215	ABHD17C,ADM,ADPGK,AIFM2,AKAP12,AQP11,COL6A3,CXADR,CXCL13,CYTH2,DCP1A,DKC1,FADS1,FAM57A,GPATCH4,HLCS,HN1,IDE,IGF1R,KIF1B,KLF11,MAP10,PARP11,PHLDB2,POLR3A,PQLC2,PRSS12,SLC27A1,STBD1,TCEB3,TMEM19,TMEM86A,TMX4,WDR93
miR-146a-5p (and other miRNAs w/seed GAGAACU)		mature microrna		1.073	bias	0.00216	BCLAF1,BNC1,BTG2,CCNA2,CELF2,DMBT1,EHF,FAF2,FAM65B,GAS7,GGA2,IFIT3,IGSF1,IL10,LFNG,LRTOMT,LTB,METTL21A,NSD1,PARP9,RCAN1,RRM2B,SDCBP2,SLC1A1,SLC2A3,SRSF6,TMEM19,TOR1A,TP53RK,WAS,YLPM1,ZFYVE1,ZNF32
miR-4440 (miRNAs w/seed GUCGUGG)		mature microrna	Activated	2.631	bias	0.00216	CXCL12,CYFIP2,EBNA1BP2,FAF2,FAM65B,KCNE3,MSL3,NIP7,PARP11,RNLS,SLC1A1,SLC2A3,SRSF6,WDR33,WDR81,WIPI1
miR-4463 (miRNAs w/seed AGACUGG)		mature microrna		1.54	bias	0.00216	ADAR,AHCTF1,AMOT,ANKRD44,ANPEP,ARID2,BNC1,BTG2,CLDN2,DTX3L,EDEM1,EMB,ENPP1,GPAT3,HEATR1,IDE,IFIT2,INIP,KATNAL1,KDR,LPGAT1,MCUR1,NCOA7,NSFL1C,PGM3,TOR1A
miR-378a-3p (and other miRNAs w/seed CUGGACU)		mature microrna	Activated	2.084	bias	0.00221	AAK1,ADAR,AHCTF1,ANK3,ART3,CBL,CCDC3,CDC23,CEP44,CYGB,DLAT,EDEM1,EMB,FBXL20,FCGR1A,FLT1,GLDN,GYS1,HDAC4,IGF1,IGF1R,INTS6,LETM1,MAFF,MTAP,NCAPG,NSFL1C,NT5DC1,PAPOLA,PRELID2,PSD3,SHE,SLC2A1,TMEM19,TOR1AIP2,TSPAN17,ZNF674
IRF7		transcription regulator	Inhibited	-2.002	bias	0.00222	ADAR,FAM26F,FCGR1A,IFI16,IFI35,IFIT2,IFIT3,IFITM3,NMI,SOCS1,TNFSF10,TPST1	146 (14)
miR-4640-3p (miRNAs w/seed ACCCCCU)		mature microrna		0.369	bias	0.00222	ANK3,ARSA,ATF6B,ATP2B2,BTG2,CDC27,CDS2,CEP44,CYFIP2,CYP1A1,ENO2,FADS1,FBXL20,FCGR1A,FCRL5,FLT1,GLUL,GRHL2,HILPDA,HTR1D,HYAL1,HYAL2,IFIT2,IRF6,KDR,LAMC2,LEP,LRRC8C,MAT2A,MTSS1,NCAPG,NR4A3,OAF,PGM3,PHACTR1,PNPLA3,POLR1D,PRMT9,RGS12,SIMC1,TCF21,TMEM201,TMEM86A,TRAPPC13,VSTM4,WIPF2,ZNF322
miR-1970 (and other miRNAs w/seed GUGUCAC)		mature microrna		0.881	bias	0.00222	ABCB11,COA7,CXADR,DLAT,GGA2,GLYR1,HN1,IDE,IL10,KLF1,MOAP1,MSC,MYCBP,NAA50,NIP7,NPHS2,PKIG,PPP1R3B,RBFA,RMI2,STAMBP,TCF19,TJP2,TNFSF10,XPO7,ZBTB7A
NOTCH1		transcription regulator		-1.464		0.00223	ADAM19,CEBPA,FLT1,FOS,IFI16,IFNG,IGF1R,IL10,ITGA6,IVL,LFNG,MYC,NR2F2,PTPRK	220 (19)
10E,12Z-octadecadienoic acid		chemical - endogenous mammalian		0.391		0.00227	CEBPA,FADS1,FASN,IGF1,LRP1,NOTCH4,NR4A3	171 (19)
NR5A2		ligand-dependent nuclear receptor		-0.488	bias	0.00228	ABCB11,CYP19A1,FASN,FOS,INHA,LHB,NR1I2,STAR	123 (11)
miR-4438 (miRNAs w/seed ACAGGCU)		mature microrna		0.566	bias	0.00228	ADAR,ARSA,ATRN,BNC1,CCP110,CELF2,CYP19A1,DPT,EIF4G1,FADS1,FLT1,GCLM,GINS4,GLYR1,HILPDA,HNMT,INIP,LAMC2,LEP,MAP3K9,MCUR1,MSL3,MTF2,NUP54,PBRM1,PODNL1,PRELID2,ROCK2,SH2B2,SIMC1,SLC2A3,SPTLC2,TOR1AIP2,VWDE,XPO7,ZCCHC10,ZNF322,ZNF382
miR-4649-3p (miRNAs w/seed CUGAGGC)		mature microrna		1.14	bias	0.00228	AAK1,ABHD17C,AKAP12,AP1M1,ARID2,CD93,CDH3,CELF2,CLDN2,CRY2,CYTH2,CYYR1,DCP1A,FAM122A,FAM57A,GGA2,HOXA1,HRH1,HTR1D,IGF1,IGSF1,KHK,KIAA1644,LETM1,LRRC8C,LRTOMT,MEF2C,METAP1,NAT9,ODF2L,PACSIN2,PARP11,PQLC1,PRSS12,QSOX1,SCARA5,SDCBP2,SLC27A1,SPTLC2,SRSF6,STIM1,TMEM19,TNFSF10,TXNDC15,UBTF,URM1,WDR33,ZNF395
docetaxel		chemical drug		0.849		0.00229	IGF1R,IL10,KDR,PLAU,TYMS	211 (18)
GNAQ		enzyme		-0.036		0.00229	FOS,GNA11,LHB,STAR,VEGFA	183 (22)
Fgf		group		-0.528	bias	0.00229	FOS,IGF1,IGF1R,KDR,LPCAT1	221 (26)
ACVRL1		kinase				0.00229	CXCL12,KDR,MYC,PLAU,VEGFA	83 (9)
miR-4299 (miRNAs w/seed CUGGUGA)		mature microrna		1.55	bias	0.0023	AMER3,ANKRD10,CRNKL1,CSRP2,CWC22,DBNDD1,DCP1A,DIO2,DNAJB9,EIF2S1,GPATCH2,GSE1,HNMT,KLF11,L3MBTL3,LRRC8C,MACF1,MID1,MTF2,NFIA,NMB,NSFL1C,PIPOX,PTPRG,RBM25,SPTLC2,TPP1,USP37,WDR81,WLS,WWP2
miR-204-5p (and other miRNAs w/seed UCCCUUU)		mature microrna	Activated	3.159	bias	0.0023	A1CF,AAK1,ABCB11,AHCTF1,AMOT,AQP11,ARL4C,CCNA2,CCP110,CDC23,CNP,CXCL14,DCP1A,DECR1,EDEM1,EEF1E1,FAM107B,FAM155B,FBXO41,FBXO9,FBXW4,FGF18,FLRT2,FLT1,GGA2,HLCS,HSPH1,IRF6,KLF11,LFNG,LRRC8C,LUZP1,METAP1,MYF6,NAA40,NCOA7,NFIA,PHACTR1,PTPRR,RNLS,SF3B1,SHE,SLC11A2,SLC19A2,SLC1A1,SOCS6,SPRED1,SS18,STEAP4,VASH1,WIPF2,ZBTB7A,ZCCHC10,ZDHHC14
miR-140-3p (and other miRNAs w/seed ACCACAG)		mature microrna		0.435	bias	0.00233	ACSM3,ADGRF2,AIFM2,ARSA,ATP1B3,B3GALNT1,BNC1,CBL,DTX4,FAIM,FBXL20,FXYD6,GRHL2,HDAC4,HNMT,HR,KATNAL1,KCTD11,LPGAT1,LUZP1,MAP10,NGB,NR2F2,NR4A3,ODF2L,PIK3C2B,PIP4K2A,PPP1R3B,RBL1,RET,SAMD8,SARAF,SERPINB11,SLC27A1,SLC38A9,TSTD2,WDR33,ZMAT3
miR-3158-3p (miRNAs w/seed AGGGCUU)		mature microrna		1.902	bias	0.00235	AMD1,ANTXR2,AREL1,ARL4C,B3GALNT1,BMPR1B,CYFIP2,DIO2,DLAT,DMBT1,DNAJC15,ENOPH1,FCRL5,HLCS,HOXD8,HR,LRTOMT,LUZP1,MAP3K9,MCAT,MOAP1,MSL3,MTF2,POLR1D,RBL1,S1PR3,SLC11A2,SLC2A1,TNFSF13,TSHZ2,UBE2F,USP37,VSTM4,VWDE,WIPF2
miR-4676-5p (and other miRNAs w/seed AGCCAGU)		mature microrna		1.815	bias	0.00236	ACTL6A,AK3,ANK3,ANKRD46,BTG2,CADM2,CAMK2N2,CDC27,CELF2,DNAJC3,E2F3,EML4,FAM134A,FAS,GLUL,HCFC2,ITGA2,LRTOMT,MEF2C,MID1,MRI1,MRPS23,NCAPG,NOLC1,NT5DC1,ODF2L,PARP9,PHLDB2,PIK3C2B,PTPRK,SAMD8,SLC35F2,STAMBP,TMCC3,TSPAN17,WDR33,ZFP1
NGF		growth factor		0.295		0.00237	BTG2,CDK5R1,DUSP1,FAS,FOS,GADD45A,ITGA2,KCTD11,LRP1,LRRFIP1,MYC,TAC1,VEGFA	218 (20)
PTGER4		g-protein coupled receptor		1.616		0.00237	CP,CYP19A1,FBXL20,IFI16,IFI35,IFIT2,IL10,LPAR6,MAFF,TNFSF10,ZDHHC14	258 (17)
miR-4477b (miRNAs w/seed UUAAGGA)		mature microrna	Activated	2.504	bias	0.00241	CP,DCP1A,DNAJC15,E2F3,ENSA,GCLM,GPSM2,HN1,MAP4K4,MAT2B,NANP,NMI,PEG3,PEX12,PHF12,PLAU,PRSS12,PTP4A2,RRM2B,SOCS4,SPRED1,THOC2,TMX4,TXNDC15,WWP1
miR-3090-3p (and other miRNAs w/seed CCCAGGU)		mature microrna	Activated	2.722	bias	0.00243	ADGRF2,ALOX15,AMBP,AMER3,ATRN,BNC1,BTG2,CBL,CDC27,CLDN2,CXCL12,CYP19A1,EML4,EXOSC2,FADS6,FAM155B,FAM65B,FLT1,FXYD6,GCLM,GINS4,HRG,HRH1,IFIT3,INIP,INTS7,KIF1B,LEP,LRRC20,LYRM4,MAFF,MAP3K9,MCUR1,MXD4,NASP,NOLC1,NT5DC1,OAZ2,PCSK1,PFKFB3,PLEKHA8,PODNL1,POLR3A,PPP1R13L,PQLC2,RBFA,S1PR5,SCAMP5,SESN2,SLC25A22,SMPD4,SPTLC2,SRGAP1,STIM1,TSPAN17,TSTD2,URM1,VSTM4,ZNHIT6
miR-1953 (and other miRNAs w/seed GGGAAAG)		mature microrna		0.966	bias	0.00245	ACSL5,ADAR,ALKBH5,ANK3,AP1M1,CAPG,CDK5R1,CNP,CXCL14,DPF2,EHF,FGF18,FXYD6,GAS7,GYS1,IRF6,KIF1B,LGI4,METAP1,METTL21A,MID1,NEK2,NFIA,NSD1,PARP9,PCSK2,PLLP,RGS2,SCAMP5,SERPINB11,SLC35D2,SLCO2B1,STAR,STEAP4,TTC9,VASH1,ZDHHC14,ZFP1,ZMAT3
Histone h4		group				0.00245	AKAP12,CD247,CYP19A1,FLT1,FOS,GAS1,MEF2C,SPHK1,STAR	179 (14)
IRS1		enzyme		-0.978		0.00246	CEBPA,CIDEA,COL6A1,COL6A3,FASN,FOS,IGF1,LEP,MEF2C,MYC	174 (20)
inosine		chemical - endogenous mammalian		0.896		0.00248	ANTXR2,CXCL13,EIF4EBP1,IFITM3,IFNG,NPC2
ID1		transcription regulator		-1.195		0.00248	DTX4,IFI16,MYC,MYF6,MYOD1,SNAI1	36 (5)
miR-4662a-5p (miRNAs w/seed UAGCCAA)		mature microrna	Activated	2.252	bias	0.00249	ACSL1,CCNA2,DICER1,DROSHA,E2F3,EEF1E1,FAM134A,FPGT,GLDN,HRH1,INTS6,LGR4,LRTOMT,MRI1,NIP7,NR1I2,ODF2L,PECAM1,RHPN2,SPRED1,STAMBP,STBD1,TJP2,TOR1AIP2,ZFX,ZNF395
CCR2		g-protein coupled receptor		-1.119		0.00249	CCL24,CXCL12,CXCL13,IFNG,IGF1,IL10,SLPI	243 (21)
miR-342-3p (miRNAs w/seed CUCACAC)		mature microrna	Activated	2.514	bias	0.0025	ADAR,AMER3,ANTXR2,APITD1/APITD1-CORT,CADM1,COMMD9,EHF,EIF2S1,ENSA,FBXL20,FBXO9,ID4,ITGB8,LAMC2,LPCAT1,MAF,METTL21A,MXD4,NCOA7,NSD1,OSBPL8,PARP9,PLEKHA8,POLR3A,RASA1,RASSF1,RBM25,RRAGD,RXRA,SHE,SLC35F2,TIA1,TXNDC15,VEGFA,XPO7,ZNF322
MAPK13		kinase		1.91		0.0025	FOS,IL10,IVL,VEGFA	182 (23)
HRG	-4.14	other		-1.067	bias	0.0025	CCL24,CXCL14,FCGR1A,SNAI1
mir-126		microrna				0.0025	CXCL12,PIK3R2,SPRED1,VEGFA	143 (7)
miR-142-3p (and other miRNAs w/seed GUAGUGU)		mature microrna	Activated	2.405	bias	0.0025	ACSL1,ADAMTS3,ANK3,ANKRD46,BCLAF1,CCDC3,CXADR,EHF,EML4,FLT1,HEATR5A,ITGB8,LGR4,NFIB,NR2C1,NSFL1C,OSBPL8,PCSK1,ROCK2,RRM2B,S1PR3,SLC25A22,SOCS6,SPRED1,TCEB3,TCF21,TEX2,WIPF2,ZNF395
miR-155-5p (miRNAs w/seed UAAUGCU)		mature microrna		1.083	bias	0.0025	AAK1,ANTXR2,ARID2,CBL,CSRP2,EHF,ENPP1,ENSA,F2,FADS1,FOS,GLDN,GLUL,HCFC2,HDAC4,IFNG,INTS6,KIF3A,LPAR6,MAF,MAP4K4,MEF2A,MON1A,MSL3,NAA50,NFIA,NR2F2,NT5DC1,PEG3,PRSS12,PTPRG,S100PBP,SARAF,SLC11A2,SOCS1,SOCS6,SPRED1,TIA1,TRAPPC13
NFE2L2		transcription regulator		-0.079		0.00252	ABCB11,ACSL5,APOA4,BNIP3,DNAJC3,EIF2S1,ENTPD5,GCLM,GNA11,GSS,IDE,IFNG,IKBKG,IL10,MAFF,MEF2C,NOCT,RAMP2,RRS1,SLC1A1,SLC2A1,VEGFA	212 (18)
miR-1343-3p (and other miRNAs w/seed UCCUGGG)		mature microrna	Activated	3.007	bias	0.00254	ADM5,ATRN,BMPR1B,BTG2,CEP44,CLDN2,COMTD1,CYFIP2,DDIT4,EHF,ENC1,FAM122A,FBXO9,FBXW4,FLT1,HYAL2,IKBKG,IL10,KCNE3,KDR,LRP1,MAB21L3,MAP3K9,MECR,NFYC,NOL6,PECAM1,PHLDA2,PHLDB2,PKIG,PNPLA3,PQLC2,RBL1,RNF40,ROCK2,RUNDC3A,RXRA,SF3B1,SLC25A22,SLC2A3,SLC38A9,SLC6A3,SLCO2B1,SPRED1,SPTLC2,STAR,TCAP,TCF19,TCF21,TMEM201,TNFSF10,TRH,TRUB2,VEGFA,VSTM4,WDR33,WWP2,ZMAT3,ZNF674,ZNF692
miR-4453 (and other miRNAs w/seed AGCUUGG)		mature microrna		1.167	bias	0.00255	ABCB11,ARID2,BHLHE40,CCT6A,CLK3,COMMD9,CYP19A1,DNAJC15,GSE1,HDAC4,HTRA3,IGF1,INTS7,KIAA1324,MCAT,PAPOLA,PARP9,PEX12,PIK3C2B,PPP6R2,SDCBP2,SLC35F2,STAR,TMEM19,TRRAP,TYMS,WDR26
istradefylline		chemical drug				0.00256	PENK,TAC1
lipoxygenase		group				0.00256	IL10,RGS2
sethoxydim		chemical toxicant				0.00256	HDAC4,MYC
lipopeptide		chemical - endogenous non-mammalian				0.00256	IFNG,IL10	75 (7)
Dexamethasone-GR		complex				0.00256	NR1I2,RXRA
RNF31		enzyme				0.00256	CYP19A1,STAR	119 (7)
ELL		transcription regulator				0.00256	FOS,MYC	142 (11)
PPP1R3C		phosphatase				0.00256	LEP,SLC2A1	91 (7)
MCHR1		g-protein coupled receptor				0.00256	LEP,TRH	110 (7)
B4GALNT1		enzyme				0.00256	FOS,VEGFA
TOR2A		other				0.00256	FOS,MYC
AKAP13		other				0.00256	FOS,MEF2C
nilutamide		chemical drug				0.00256	CYP19A1,IGF1R
amantadine		chemical drug				0.00256	FOS,SLC6A3	68 (5)
p-chloroamphetamine		chemical drug				0.00256	FOS,OXT	70 (7)
miR-323-3p (and other miRNAs w/seed ACAUUAC)		mature microrna		1.253	bias	0.00258	ABHD17C,CYYR1,FLT1,HNMT,INTS6,INTS7,KIF1B,KLF11,MTCH2,OSBPL8,RNF128,SPTLC2,SRGAP1,TMTC4,WDR26,WWP1,ZNF395
miR-3144-5p (miRNAs w/seed GGGGACC)		mature microrna	Activated	2.574	bias	0.0026	A1CF,ADAM19,ADPRHL2,AMOT,ARSA,ASB13,ATP2B2,CELF2,COG8,CXCL12,DDX42,DNAJC15,DTX4,ENSA,EXOSC2,FYN,GINS4,GLDN,GLYR1,HBEGF,HLCS,HTRA3,IKBKG,IRF2BP1,ITGB8,KIAA1644,KIF1B,MAB21L3,MAP3K9,MED15,NAA40,NSD1,PLAU,POLR3A,PTOV1,PYGM,RBFA,RET,RGS12,SESN1,SLC27A1,SOCS1,SORBS2,TBPL1,TCEB3,TCF21,TIA1,TMCC3,TMEM201,TSPAN9,WWP2,YLPM1,ZFP36,ZNF692
miR-1258 (miRNAs w/seed GUUAGGA)		mature microrna		1.17	bias	0.0026	AREL1,BBIP1,CDC23,COG8,CYTH2,DNAJC21,EXOSC2,FCRL5,FLT1,IL10,KCTD8,KIF3A,MAMDC2,NAT9,NCAPG,OSBPL8,PCSK1,PCSK2,PIGC,PSD3,SRGAP1,WIPF2
miR-1252-5p (miRNAs w/seed GAAGGAA)		mature microrna	Activated	2.285	bias	0.00261	A1CF,ABCB11,ANKRD44,ATRN,BHLHE40,CEP44,COA7,CXCL12,DENND4B,DPT,EDEM1,EML4,FLT1,GCLM,GLRX,GRHL2,HNMT,HSPH1,ID4,ITGA6,LPAR6,NFIB,NR2F2,PARP9,SLC11A2,SLCO2B1,STIM1,TMX4,TSPAN9,VGLL3,WDR26,XPO7,ZNF280D
miR-3660 (and other miRNAs w/seed CUGACAG)		mature microrna	Activated	2.212	bias	0.00261	AK3,ANKRD10,ANTXR2,CCDC3,CCNA2,CCP110,CERCAM,COMMD9,CXCL14,CYTH2,DNAJC3,FAM57A,FASN,FBXL20,FLRT2,GPAM,KLRC4-KLRK1/KLRK1,MAN1A1,MED15,MXD4,NAA50,PLEKHA8,PTPRK,RET,SESN1,SLC35F2,SORBS2,TCF21,TEX2,TMCC3,TNFRSF17,TNFSF10,TOR1AIP2
miR-3137 (miRNAs w/seed CUGUAGC)		mature microrna	Activated	3.287	bias	0.00262	ABHD5,ADAR,AKAP12,ATAD2B,CAST,CDC23,CELF2,CXCL14,DNAJC21,DPF2,EYA3,FLT1,GGA2,HSPA4,HSPA4L,IGSF1,KHK,MAP10,MAT2A,MTCH2,NFIB,PGM3,PRSS12,SNAI1,TXNDC15,WDR33,WIPF2
medroxyprogesterone acetate		chemical drug		0.664		0.00262	BTG2,FAS,HTRA3,IFNG,IL10,MYC,NCAPG,NEK2,PLAU,SLPI	236 (23)
3-deazaneplanocin		chemical drug				0.00263	FAS,IFNG,MYC
C1q		complex				0.00263	IFNG,IL10,PECAM1	232 (20)
METRNL	1.97	other				0.00263	ACSL1,DIO2,IL10
CCK		other				0.00263	FOS,PENK,VEGFA	215 (21)
CTNND1		other				0.00263	CDH3,CDH5,SNAI1
RPS6KA4		kinase				0.00263	DUSP1,FOS,IL10	237 (22)
dimethyl fumarate		chemical drug				0.00263	KDR,SNAI1,VEGFA	197 (22)
nordihydroguaiaretic acid		chemical drug				0.00263	IGF1R,IVL,STAR	138 (7)
IRF9		transcription regulator		-1.406		0.00264	IFIT2,IFIT3,IFNG,SOCS1,TNFSF10	127 (11)
miR-4666a-3p (miRNAs w/seed AUACAAU)		mature microrna		1.726	bias	0.00265	A1CF,AKAP9,ART3,BMPR1B,BRF2,CCP110,CEP44,CXCL12,EWSR1,HEATR5A,ITGA2,KIF3A,LRRC8C,MAMDC2,PATL1,PSD3,SHE,SOCS6,WIPI1
miR-4297 (and other miRNAs w/seed GCCUUCC)		mature microrna		0.923	bias	0.00266	ALKBH5,ANTXR2,ARID2,ARSA,CADM1,CELF2,CLDN2,CLK3,CXADR,DPT,EHF,FAM122A,FCGR1A,FLRT2,GLYR1,GTF2F2,HN1,ITIH3,MAB21L3,MSL3,MXD4,NOTCH4,OSBPL8,PACSIN2,PPP1R3B,PRELID2,RASSF1,RRM2B,SLC25A20,SLC37A4,SMPD4,SRGAP1,STAMBP,STARD8,TFDP1,TMCC3,TOR1AIP2,TSHZ2,UBTF,URM1,VASH1,WIPI1,ZDHHC14
EHF	1.78	transcription regulator		1.51		0.00267	ANPEP,CDH3,CYP1A1,EHF,FCER1A,KDR,MS4A2,VEGFA
ITK		kinase		-0.414		0.00267	FAS,IFNG,IL10,LPAR6,MAF,MYC,SLC2A1,TNFSF10	135 (17)
miR-22-3p (miRNAs w/seed AGCUGCC)		mature microrna	Activated	3.3	bias	0.00269	ABCB11,AMOT,CBL,CCDC3,CDH5,CNP,COA7,DCP1A,DDIT4,DNAJC7,DPF2,EYA3,FAM155B,FAM57A,FAS,FBXO41,FLT1,GHRHR,GLDN,GPAT3,GPATCH4,GPSM2,HDAC4,ITGB8,LRPPRC,LRRC20,MAT2A,MRPS23,MTF2,MXD4,MYCBP,NFIB,NGB,NSD1,PPP1R3B,PRELID2,PSD3,RBM25,RGS2,SESN1,SLC25A22,SLC2A1,SNAI1,SPTLC2,TMEM19,TRUB2,TTC9,TTLL12,USP37,VASH1,WDR33,WDR93,ZNHIT6
SIRT1		transcription regulator		0.444		0.00269	BCLAF1,BNIP3,CYP1A1,EDEM1,ERO1A,GADD45A,IFNG,IGF1,IGF1R,IL10,LEP,MEF2C,MYC,NDUFA5,PNPLA3	222 (27)
miR-4474-5p (miRNAs w/seed UAGUCUC)		mature microrna		1.272	bias	0.0027	ADM5,ATP2B2,BCLAF1,CXADR,CXCL13,GCLM,GPATCH4,ITGB8,KIF1B,KLRC4-KLRK1/KLRK1,L3MBTL3,LRRC8C,LUZP1,PLSCR1,RCAN1,SARAF,SLC2A1,SRGAP1,VGLL3,WDR33,ZDHHC14
E2f		group		0.896		0.00273	CCNA2,IGF1,ITGA6,MYC,RBL1,TYMS,USP37	202 (19)
atorvastatin		chemical drug		1.835		0.00274	DUSP1,FLT1,FOS,GPAM,HBB,IFNG,IL10,INIP,LEP,S100B,SLCO2B1,VEGFA,ZFP36	215 (19)
NFKBIB		transcription regulator				0.00276	CRADD,IFNG,IGF1R,PLAU,TNFSF10,VEGFA	213 (18)
luteolin		chemical - endogenous non-mammalian				0.00276	CYP19A1,FOS,GCLM,IGF1R,MYC,PPP1R13L	194 (19)
miR-4667-3p (miRNAs w/seed CCCUCCU)		mature microrna		1.137	bias	0.00276	AAK1,ABCB11,ABI3,ADAM19,ADGRF2,AIFM2,ALDOB,AMOT,ANK3,ARSA,ATF6B,ATP2B2,BTG2,CCL21,CD93,CEBPA,COL6A3,CRY2,DESI2,DPT,DROSHA,E2F3,FADS1,FAM107B,FAM134A,FBXO41,GYS1,HN1,HTR1D,HYAL2,IGF1,LRRC8C,METTL21A,MXRA5,NR2F2,NT5DC1,NUP54,PIK3C2B,PLLP,PPP1R13L,PPRC1,PTOV1,PXK,RXRA,SCAMP5,SESN2,SF3B1,SLC2A3,SLC37A4,SLC6A3,SMPD4,STAMBP,STIM1,TCEB3,TCF19,TMEM144,TMEM86A,TSPAN9,TSTD2,UBTF,WIPF2,ZFP1,ZNF674
IL15		cytokine		-1.64		0.00279	ARHGDIB,CD2,CXCL12,FAS,FYN,GAPDH,ID4,IFI35,IFNG,IL10,KLRC4-KLRK1/KLRK1,LEP,MAF,MYC,PTP4A2,SOCS1,TJP2,TNFRSF17,TNFSF10,TOP2A,ZFP36	202 (20)
miR-4804-3p (miRNAs w/seed GCUUAAC)		mature microrna	Activated	2.44	bias	0.00279	ADGRF2,AK3,AMOT,ATF6B,CCT6A,COL6A3,CRYZL1,EHF,FLT1,LETM1,LPAR6,MTCH2,NCAPG,NOLC1,RET,RRAGD,VGLL3
Sos		group				0.0028	ANK3,CADM1,CAST,FLRT2,FOS,HOXA1,ITGA6,KIF1B,MAP4K4,NFIL3,PLAU,PXK,SLPI,TPP1	155 (11)
miR-4311 (miRNAs w/seed AAAGAGA)		mature microrna		0.479	bias	0.00286	A1CF,COMMD9,DESI2,DNAJC21,IRF6,ITGA2,KLF11,MID1,NCAPG,NRCAM,PARP9,PRELID2,RBM25,RNF128,RRAGD,SAMD8,SARAF,SLC19A2,TIPIN,TNFRSF17,TP53RK,ZNF32
miR-4765 (miRNAs w/seed GAGUGAU)		mature microrna		1.479	bias	0.00287	ACSL5,BNIP3,CCNA2,CRADD,CXCL13,EMB,FAM107B,HNMT,INTS6,KLF11,LRRFIP1,MSL1,NAA40,NFIL3,RGS2,ROCK2,SLC35F2,ZDHHC14,ZNF280D,ZNF322
miR-548d-3p (and other miRNAs w/seed AAAAACC)		mature microrna		1.254	bias	0.00287	BAG3,CADM2,CDH5,EGLN1,GNA11,HOXD8,KLF11,LRRC8C,ODF2L,PARP11,PSD3,RNLS,SAR1B,SOCS6,SPRED1,SS18,TSTD2,WDR33,WWP1,ZCCHC10
thioacetamide		chemical toxicant		0.218	bias	0.00287	AKAP12,BHLHE40,CP,CSRP2,CYGB,CYP1A1,FCER1A,FXYD6,HSPA4,IGF1,LAMC2,MS4A2,MYC,PCOLCE,PIK3R2,TMEM45A	257 (13)
miR-4658 (and other miRNAs w/seed UGAGUGU)		mature microrna		0.29	bias	0.00291	ATRN,CALML4,CYP19A1,FBXL20,HEATR1,INTS7,KLF11,LAMC2,LRPPRC,MID1,MYBPC1,NPHS2,NSD1,OSBPL10,PHLDB2,PRSS12,PTHLH,ROCK2,TAC4,VGLL3,WAS,WLS,XPO7
miR-4494 (miRNAs w/seed CAGACUG)		mature microrna		1.895	bias	0.00291	ABHD5,ANKRD44,ARID2,DIO2,EDEM1,ENSA,FAM162B,FAM65B,FBXL20,FCRL5,FLRT2,KLF11,LPGAT1,LRRC20,METTL21A,MS4A2,NOLC1,PARP11,PIP4K2A,PNPLA3,PSD3,SPTLC2,SRGAP1,SRSF11,TCF21,TNFSF10,TSTD2,UBE2F,USP37
miR-574-5p (miRNAs w/seed GAGUGUG)		mature microrna		1.523	bias	0.00291	ANKRD10,ATRN,CADM2,CALML4,CYP19A1,FAM193B,FBXL20,FGF18,FLRT2,GAPDH,GLDN,HEATR1,INTS6,KATNAL1,METRNL,MRPS23,MYCBP,NPHS2,NSD1,NT5DC1,OSBPL10,PARP9,PGF,POLR1D,PRSS12,SLCO2B1,TAC4,WAS,ZNHIT6
miR-3173-5p (and other miRNAs w/seed GCCCUGC)		mature microrna		1.703	bias	0.00292	ADAM19,ADAR,AIFM2,ANPEP,ARL4C,ATRN,CCDC3,CNP,COL6A1,CRY2,CXCL12,CYFIP2,EDEM1,FADS1,FBXO41,FCRL5,FLT1,GRHL2,HR,KCNE3,KCTD11,KDR,LGR4,LRRC20,MAP3K9,MXD4,NCK2,OAZ2,PATL1,PECAM1,PGF,PLAU,PLEKHA8,PNPLA3,POLR1D,PPP6R2,PRELID2,PSD3,PTOV1,RBFA,RRAGD,RXRA,SCAMP5,SLC16A3,SLC25A22,SLC37A4,SLC6A3,SPHK1,STARD8,TMEM201,TOR1A,TSHZ2,TTLL12,VASH1,WIPF2,ZER1,ZFYVE1,ZNF395
miR-4633-5p (miRNAs w/seed UAUGCCU)		mature microrna		1.24	bias	0.00293	ARID2,CACYBP,CAST,CEP44,CXCL14,CYP19A1,ERO1A,FLRT2,GINS4,HYAL1,ID4,ITGA2,KIF1B,LEP,LRPPRC,MEF2C,NRCAM,SAR1B,SOCS6,TMCC3,TMTC4,TXNDC15,VGLL3,WDR33
miR-3148 (miRNAs w/seed GGAAAAA)		mature microrna		1.424	bias	0.00294	AAK1,AK3,ALKBH5,ANKRD44,CADM1,FAM193B,FCER1A,GCLM,GPSM2,KATNAL1,MTAP,NFIA,NR2F2,PTP4A2,RBFA,SLC11A2,TBPL1,TMEM19,WDR26
miR-3130-5p (and other miRNAs w/seed ACCCAGU)		mature microrna	Activated	2.155	bias	0.00297	ABHD17C,AIFM2,ASB13,BMPR1B,CD3E,CXCL12,DRAM2,E2F3,FAM57A,FAS,GLYR1,GYS1,HEATR1,HRH1,INTS6,KIF1B,LGR4,LTN1,NCOA7,NR1I2,ODF2L,PARP9,PEX3,PHLDB2,PODNL1,PPP1R3B,RBL1,S100PBP,SAMD8,SMC4,SRGAP1,TMEM144,TNFSF10,TRRAP,UBE2F,ZNF280D
miR-4715-3p (miRNAs w/seed UGCCACC)		mature microrna		1.781	bias	0.003	AP1M1,CACYBP,CAST,CD93,CYTH2,DPF2,DYNC2LI1,E2F3,FADS1,FADS6,FAM65B,FBXL20,HEATR5A,HILPDA,HR,HRH1,IFIT2,INIP,LGR4,LUZP1,MAF,MAP3K9,MAP4K4,MSL3,NGB,OAF,PALLD,PFKFB3,PLEKHA8,PODNL1,PPP1R3B,PQLC2,QSOX1,RCAN1,RET,RXRA,SCAMP5,SLC1A1,SNAI1,SRSF11,SRSF6,TCF19,TMEM144,TPP1,TSPAN17,TSTD2,WDR33,ZNF674
apomorphine		chemical drug		0.283		0.00301	FOS,IGF1R,OXT,TAC1	195 (24)
IL2RA		transmembrane receptor		0.277		0.00301	FOS,IFNG,IL10,MYC	188 (21)
cannabidiol		chemical drug		0		0.00301	ENO2,PENK,S100B,TAC1	51 (4)
pregna-4,17-diene-3,16-dione		chemical - endogenous non-mammalian		-0.106	bias	0.00301	ABCB11,CEBPA,MYC,VEGFA	178 (17)
R5020		chemical reagent		-0.747		0.00301	CEBPA,CYP19A1,LAMC2,MYC	231 (25)
PDGFC		growth factor		-1.131	bias	0.00301	FLT1,KDR,MYC,VEGFA	156 (10)
PDGF-AA		complex				0.00301	FOS,HBEGF,ID4,IGF1	174 (17)
miR-577 (miRNAs w/seed AGAUAAA)		mature microrna	Activated	2.153	bias	0.00301	ADAMTS3,AKAP12,ARID2,BHLHE40,CADM2,CXADR,EIF2S1,FGG,HNMT,HRH1,MCUR1,ODF2L,SIMC1
ZEB1		transcription regulator		1.969		0.00302	CXADR,GRHL2,LHB,LPCAT1,PLAU
IL27RA		transmembrane receptor		1.054		0.00302	CXCL13,FAS,IFNG,IL10,LTB	216 (19)
ROCK2	1.56	kinase		0.14		0.00302	CEBPA,FAS,IVL,MYF6,MYOD1
SERPINE1		other		-0.277		0.00302	FLT1,FOS,IFNG,IL10,PLAU	228 (21)
CGS 21680		chemical reagent		-0.622		0.00302	FOS,IFNG,IL10,RGS2,VEGFA	167 (22)
AKT2		kinase		-0.651		0.00302	CIDEA,IFNG,IGF1R,LEP,PALLD	222 (22)
miR-3692-3p (miRNAs w/seed UUCCACA)		mature microrna	Activated	3.018	bias	0.00304	AKAP9,ARID2,ATRN,B3GALNT1,BUB3,CACYBP,CADM1,DNAJC21,DNAJC7,DROSHA,EHF,FAM57A,FOS,HSPH1,IDE,IGSF1,INTS6,LRRC8C,MEF2C,MYF6,PEG3,PGF,PHLDB2,POLR3A,RCAN1,RXRA,S1PR3,SESN1,SIMC1,SLC11A2,SLC35D2,SOCS6,SPRED1,SRSF6,STBD1,TARBP1,THOC2,TMEM165,TNFRSF17,UBTF,WDR33,WWP1,ZFP1
miR-205-5p (and other miRNAs w/seed CCUUCAU)		mature microrna		1.743	bias	0.00304	AAK1,ACSL1,AMOT,AREL1,BMPR1B,CADM1,CDC27,CNP,DRAM2,E2F3,ENC1,FAM155B,GSE1,HCFC2,LETM1,LPCAT1,LRP1,LRPPRC,NAA50,NCAPG,NFIB,PCP4L1,PCSK1,PEG3,PSD3,PTP4A2,RHPN2,SLC19A2,SNRPF,SRGAP1,SS18,TMEM144,USP37,VEGFA
miR-3675-3p (miRNAs w/seed AUCUCUA)		mature microrna	Activated	2.16	bias	0.00305	ADAMTS3,ADM,APITD1/APITD1-CORT,CRY2,ENC1,ENSA,FLT1,FPGT,GLUL,HTR1D,LRTOMT,METTL21A,PENK,SLC38A9,STARD8,TAC1,VSTM4,ZFX,ZNHIT6
MAF	1.56	transcription regulator		1.212		0.00307	ANPEP,GCLM,IFNG,IL10,MAF,PCSK2	134 (10)
NFkB (complex)		complex		-0.128	bias	0.00307	CRADD,CXCL12,EHF,ENPP1,FAS,FCGR1A,FGG,FOS,GADD45A,IFNG,IL10,ITGB8,KDR,KRT19,MTSS1,MYC,NCOA7,SLC11A2,SLC16A3,SLC2A1,SLC37A4,SLPI,STIM1,TNFSF10,TRH,VEGFA,ZFP36	221 (20)
miR-140-5p (and other miRNAs w/seed AGUGGUU)		mature microrna		1.012	bias	0.0031	ABHD5,ACSL5,AREL1,CELF2,CERCAM,CXCL12,CYTH2,DRAM2,FADS1,FLRT2,GLUL,GYS1,HDAC4,HSPA4L,IFIT2,IGF1R,IRF6,KIF1B,MSL3,MTSS1,NR4A3,ODF2L,PBRM1,PHLDB2,PLOD1,PTP4A2,RBM25,SLC13A4,SLC2A1,SPRED1,STIM1,TMX4,VEGFA,WDR33,WDR93,WNK4
curcumin		chemical drug		-0.73		0.00311	CEBPA,DNMT1,FAS,FOS,FYN,GCLM,GLUL,IFNG,IL10,IVL,LEP,MYC,PGF,PLAU,SOCS1,VEGFA	213 (20)
sphingosine-1-phosphate		chemical - endogenous mammalian		0		0.00311	FAS,FOS,IFNG,LEP,RXRA,S1PR3,SPHK1,STAR	253 (21)
bisindolylmaleimide I		chemical - kinase inhibitor		-0.863	bias	0.00311	CYP19A1,E2F3,FOS,LHB,RCAN1,TJP2,TNFSF10,VEGFA	207 (23)
miR-3117-3p (miRNAs w/seed UAGGACU)		mature microrna		1.396	bias	0.00313	CCNA2,CD3E,CXCL13,DENND4B,DKC1,FAM188A,FBXO9,GGA2,KIAA1644,KIF1B,LAMC2,LRTOMT,NAA50,RNLS,SCARA5,SHE,SMC4,SOCS4,TMCC3,TMEM86A,TMX4,TOR1AIP2
miR-181b-1-3p (and other miRNAs w/seed UCACUGA)		mature microrna		1.694	bias	0.00314	ANKRD44,BUB3,CADM1,CD247,CEP44,CXCL12,CYP19A1,DHRS1,DKC1,DNAJC21,ENOPH1,EXOSC2,FAM65B,GLRX,GPATCH2,KLRC4-KLRK1/KLRK1,LMCD1,MAF,MAMDC2,MAP3K9,METAP1,OSBPL8,PDE4DIP,PIP4K2A,PNPLA3,PTP4A2,PTPRG,SH2B2,SLC11A2,SRSF11,TMCC3,TOR1AIP2,WDR33,ZNF280D,ZNF674
miR-4270 (and other miRNAs w/seed CAGGGAG)		mature microrna	Activated	2.059	bias	0.00315	ACSL1,ADAM19,ADGRF2,ADPRHL2,AMER3,AREL1,CD247,CD3E,CDK5R1,CXCL12,CYGB,CYP19A1,CYYR1,DCP1A,DGUOK,DIO2,DNAJC15,DPT,DTX4,DYNC2LI1,EDEM1,EML4,ENSA,FBXO7,FLRT2,GPATCH4,GRHL2,KIAA1644,LEP,LRP1,LRRC20,LYRM4,MAT2A,MEF2A,MSL1,MTSS1,NGB,PCSK2,PLLP,PTP4A2,SCAMP5,SLC27A1,SLC37A4,SLC6A3,SRGAP1,STEAP4,STIM1,TFDP1,TMEM201,TOR1A,TOR1AIP2,TPP1,TRIP6,TRRAP,TSPAN9,VEGFA
miR-3653-3p (miRNAs w/seed UAAGAAG)		mature microrna		1.943	bias	0.00316	CADM1,CCP110,CXADR,DNAJC15,DNAJC3,INTS6,KIAA1324,NUP54,PLEKHA8,PRELID2,SLC11A2,TMTC4,ZNF280D
miR-711 (miRNAs w/seed GGACCCA)		mature microrna		1.815	bias	0.00319	ABCB11,AMBP,ARHGDIB,CDC23,CDH5,CDK5R1,DDX42,DESI2,EHF,EXOSC2,FAM57A,HEATR1,HSPA4L,IDE,IRF2BP1,KCTD11,KLF1,KLRC4-KLRK1/KLRK1,LETM1,MYCBP,NR2F2,PKIG,PLAU,PPP6R2,RBFA,RET,SLC11A2,SLC2A1,SLC37A4,SLC6A3,SPTLC2,STARD8,STIM1,TMEM248,TMEM86A,TSPAN9,VEGFA,VGLL3,WDR81,WWP2,ZNHIT6
miR-3202 (miRNAs w/seed GGAAGGG)		mature microrna		1.656	bias	0.00321	ASB13,CD3E,CDK5R1,CNP,CSTF1,CXCL12,DESI2,DNAJC21,DNAJC7,E2F3,EIF4EBP1,EYA3,FBXO41,FXYD6,GAS7,GLYR1,GSE1,HRH1,HTR1D,KCNE3,KLF11,MAF,MECR,MID1,MXD4,NPHS2,OAF,ODF2L,PBRM1,PECAM1,PHF12,PLAU,PODNL1,PPAN,PQLC1,QSOX1,RNF40,RUNDC3A,SCAMP5,SCARA5,SESN2,SPRED1,SS18,STAMBP,STIM1,TCF21,TEX2,TOR1AIP2,TRRAP,TSPAN9,TTLL12,URM1,VASH1,WBP2,WIPF2,ZBTB7A,ZER1,ZNF630
miR-491-5p (and other miRNAs w/seed GUGGGGA)		mature microrna	Activated	2.805	bias	0.00321	ABHD5,ADGRF2,AMD1,ARHGDIB,ASB13,BHLHE40,BTG2,CALML4,CDS2,COL6A1,CP,CYGB,CYTH2,FBXO41,FBXO9,FCRL5,GLDN,HBEGF,HEATR1,HR,IGSF1,KHK,LRRC20,LRTOMT,LYRM4,MAN1A1,MAT2A,MTAP,MTSS1,NAGPA,NCOA7,NFIB,OSBPL10,PATL1,PCP4L1,PHF12,PODNL1,POLR3A,PPP1R3B,PYGM,RAMP2,RBFA,SESN2,SLC2A1,SLC6A3,SMPD4,SNAI1,TCEB3,TMEM19,TMEM86A,TNFSF10,TP53RK,TPCN2,TSHZ2,TSPAN9,TTC9,TTLL12,UBTF,ZNF395,ZNF630
miR-532-5p (and other miRNAs w/seed AUGCCUU)		mature microrna	Activated	2.935	bias	0.00324	ANK3,ARID2,CAST,CEP44,CXCL12,CYYR1,ERO1A,EYA3,FLRT2,GPSM2,ID4,IDE,ITGA2,ITGB8,KLRC4-KLRK1/KLRK1,LEP,LTN1,MAF,NFIB,NR1I2,PALLD,PCSK1,PDE4DIP,RBM25,TIA1,VGLL3,WDR33
miR-564 (and other miRNAs w/seed GGCACGG)		mature microrna	Activated	2.761	bias	0.00324	AAK1,AIFM2,AK3,E2F3,FAAP24,FLT1,GINS4,GYS1,HLCS,KIAA1324,LFNG,LPCAT3,LRRFIP1,MRI1,MXD4,NEK2,NFIB,NIP7,NR2C1,PKIG,PQLC2,SLC27A1,SLC35F2,SLC6A3,SMOX,SS18,TSPAN9
EPO		cytokine		-1.115		0.00325	CXCL12,FAS,FOS,GLUL,HBB,KLF1,MTF2,MYC,MYOD1,NFIB,PRKCZ,RNF128,ROCK2,SLC11A2,SOCS1,TNFSF10,VEGFA	221 (19)
YAP1		transcription regulator		0		0.00326	BMPR1B,DICER1,FOS,IGF1R,MYC,NEK2,PPP1R3B	114 (13)
miR-3944-5p (miRNAs w/seed GUGCAGC)		mature microrna		1.049	bias	0.00331	AAK1,AIFM2,AMD1,AMER3,ANKRD44,AREL1,ATAD2B,COL6A1,DMBT1,E2F3,ENC1,ENO2,FAF2,FLRT2,FLT1,LFNG,MECR,MSC,MTSS1,MXD4,NFIA,NR4A3,RCAN1,SAR1B,SMPD4,SNAPC5,SRGAP1,STAMBP,STAR,TAC4,TBPL1,TCEB3,TJP2,TMEM201,TPCN2,TTLL12
YY1		transcription regulator		-0.578		0.00331	BTG2,CAPG,CCNA2,CXCL12,FAS,FOS,HELLS,ID4,IFNG,KDR,MAT2A,MYC,MYOD1,STAR,TOP2A	238 (27)
ciprofibrate		chemical drug		1.095		0.00332	A1CF,ABCB11,CIDEA,CXCL12,IGF1,LPCAT3,NPC2,PIPOX,PLSCR1,SLC37A4,SLCO2B1	245 (19)
17-alpha-ethinylestradiol		chemical drug		0.013		0.00332	ABCB11,APOA4,FOS,FXYD4,IFI16,IGF1,KRT19,MRPS23,SESN1,SOCS1,VEGFA	258 (22)
STAT5a/b		group		-0.447		0.00335	DUSP1,FOS,IFNG,IGF1,MAF,MYC,SLC2A3,SOCS1	228 (23)
FGF19		growth factor				0.00335	ACSL1,FASN,FOS,GADD45A,LEP,PEG3,RGS2,SLPI	208 (15)
colchicine		chemical drug		-0.775		0.0034	ABCB11,FAS,FOS,LEP,NR1I2,PTHLH	213 (18)
ADRA1A		g-protein coupled receptor				0.0034	CSRP2,CYP1A1,DUSP1,FOS,PTHLH,VEGFA	187 (18)
NKX3-1		transcription regulator				0.0034	BTG2,CXCL13,FOS,MYC,PTP4A2,PTPRK	159 (10)
miR-873-5p (and other miRNAs w/seed CAGGAAC)		mature microrna		1.88	bias	0.0034	ANPEP,ARL4A,CADM1,CAST,CD93,CDC27,CDH5,CELF2,CRY2,DPF2,ENPP1,FOS,HNMT,HR,IDE,KLF11,LAMC2,LETM1,NAGPA,NASP,NDUFA5,NFIB,NMB,PATL1,PECAM1,PHRF1,PSD3,RAB32,RBFA,SAMD8,SOCS4,SRSF11,TIA1,TMTC4,TOR1A,TSHZ2,TTLL12,WDR33,ZFX
carbamylcholine		chemical drug		1.452		0.00344	BTG2,FOS,IKBKG,PTHLH,RGS2	213 (23)
steroid		chemical - endogenous mammalian		0.818		0.00344	CEBPA,CYP19A1,FOS,IGF1,MYC	210 (22)
IRS2		enzyme		0.482		0.00344	CEBPA,FASN,FOS,LEP,SLC2A1	192 (25)
TAL1		transcription regulator		-1.109		0.00344	CDH5,FCER1A,HBB,KLF1,MS4A2
NR3C2		ligand-dependent nuclear receptor		0.194		0.00344	CYFIP2,DDIT4,IGF1R,KDR,NFIA,PGF,RGS2,VEGFA,VLDLR	200 (11)
miR-3661 (and other miRNAs w/seed GACCUGG)		mature microrna		1.812	bias	0.00347	ACSBG1,ANTXR2,APITD1/APITD1-CORT,ASB13,BNC1,CDS2,DLAT,E2F3,FLRT2,GLUL,GRHL2,HRH1,KATNAL1,LRRC20,MAT2A,MED15,MEF2C,MGMT,NAA40,NFIA,PARP9,RET,SAR1B,SCAMP5,SLC26A3,SLC35F2,SLPI,SPTLC2,TCEB3,TMEM165,TMEM201,TPP1,TTC9,URM1,VASH1,VEGFA,WBP2,ZFYVE1
DICER1	-2.25	enzyme		0.032		0.0035	ANKS3,ANPEP,FOS,IFNG,IL10,KDR,KLF1,LHB,LPAR3,NPHS2,PLAU	132 (14)
miR-3912-3p (miRNAs w/seed AACGCAU)		mature microrna		-0.597	bias	0.00353	ANKRD44,ARID2,FAM107B,GLRX,HDAC4,HTR1D,LFNG,PNPLA3,PRELID2,S100B,SOCS6,WLS
N(6)-(3-iodobenzyl)-5'-N-methylcarboxamidoadenosine		chemical drug				0.00353	FOS,IL10,RGS2	216 (21)
Integrin		complex				0.00353	FOS,MYC,VEGFA	191 (20)
(E)-4-hydroxy-3-methyl-but-2-enyl pyrophosphate		chemical - endogenous non-mammalian				0.00353	CXCL13,IFNG,TNFSF10
SIM1		transcription regulator				0.00353	LEP,OXT,TRH
CHRM3		g-protein coupled receptor				0.00353	FOS,ITGA2,LEP	219 (21)
TLE1		transcription regulator				0.00353	DUSP1,FOS,ROCK2
PIM2		kinase				0.00353	IFNG,MYC,SOCS1	103 (12)
IL16		cytokine				0.00353	FOS,IFNG,SKP2	219 (21)
triptorelin		biologic drug				0.00353	CYP19A1,FOS,LHB	227 (23)
ryanodine		chemical - endogenous non-mammalian				0.00353	FOS,PRKCZ,STAR	139 (12)
LIPE		enzyme		-1.413		0.00354	ACSL1,CEBPA,CP,FASN,FOS,GAPDH,ITGA6,MEF2C,RXRA,STAR	171 (19)
Mt2		other		1.119	bias	0.0036	CEBPA,FOS,LEP,MYC	218 (19)
sulindac		chemical drug		-1		0.0036	ALOX15,CYP1A1,MYC,VEGFA	198 (23)
RAG2		enzyme				0.0036	ALOX15,CD2,HELLS,IFNG	78 (7)
OGT		enzyme				0.0036	FOS,MYC,NEK2,SKP2	210 (17)
sucrose		chemical - endogenous mammalian				0.0036	FASN,FOS,LEP,OXT	112 (11)
Nfat (family)		group		-0.239	bias	0.00361	FAS,FGF18,HBEGF,IFNG,IL10,NCOA7,RCAN1,RNF128	185 (21)
GDF2		growth factor		-1.23	bias	0.00361	CXCL12,EMB,FOS,GJA4,IGF1,MYC,NRCAM,SLC3A2	184 (15)
miR-4661-5p (miRNAs w/seed ACUAGCU)		mature microrna	Activated	3.071	bias	0.00361	AMOT,ANK3,APITD1/APITD1-CORT,BCLAF1,CBL,EEF1E1,ENOPH1,HOXD8,HSPH1,IGSF1,MSL1,NAA50,NCAPG,NFIB,NR2C1,ODF2L,PTHLH,SAR1B,SKP2,SOCS4
miR-4763-5p (miRNAs w/seed GCCUGCC)		mature microrna		1.11	bias	0.00362	ACSBG1,AMBP,CCDC3,CELF2,COA7,COL6A3,COMMD9,CRY2,DNAJC15,DNAJC3,EIF4EBP1,FADS6,FAM57A,FAS,FXYD4,FXYD6,GINS4,HEATR5A,HR,HRH1,HTRA3,IDE,INTS7,KLF11,LAMC2,LPGAT1,MAB21L3,METTL21A,MSC,MSL1,MXD4,NAA40,NFIB,NOL6,NOTCH4,NR2C1,PCSK2,PECAM1,PFKFB3,PIK3C2B,PITRM1,PLLP,RASSF1,RET,RGS12,RMI2,RUNDC3A,SAMD8,SCAMP5,SDCBP2,SLC16A3,SORBS2,STAR,TAC4,TCF21,TJP2,TMEM86A,TNFSF13,TTLL12,UBTF,URM1,WDR93,ZNF692
miR-4746-5p (miRNAs w/seed CGGUCCC)		mature microrna		1.047	bias	0.00364	ADM,AKAP12,ATP1B3,CD2,CDH5,CEBPA,CLEC14A,FLT1,GLUL,IKBKG,IRF6,MAFF,MXD4,PACSIN2,PHLDA2,PQLC1,PQLC2,RUNDC3A,SESN2,TJP2,TXNDC15,WDR81
miR-3115 (miRNAs w/seed UAUGGGU)		mature microrna		0.704	bias	0.00364	AAK1,AQP11,CRNKL1,CWC22,CYYR1,DHRS1,ERO1A,FAM155B,HEATR1,KIF1B,MEF2A,NOTCH4,NT5DC1,PIPOX,SNRPF,SPTLC2,SRSF6,TBC1D32,TBL3,WDR33,ZFP36,ZNF322
miR-645 (miRNAs w/seed CUAGGCU)		mature microrna	Activated	2.31	bias	0.00369	AMD1,AMER3,AQP11,ARHGDIB,B3GALNT1,CBL,DROSHA,ENTPD5,FCGR1A,GAS7,GLUL,GPATCH4,IFIT2,IRF6,MACF1,MEF2A,NAA50,NFIA,OAZ2,PDE4DIP,PLAU,PPP1R3B,SLC11A2,STEAP4,TCEB3,TRH,VASH1
miR-509-5p (and other miRNAs w/seed ACUGCAG)		mature microrna	Activated	3.52	bias	0.00369	ADAR,BUB3,CCT6A,CEP44,COG8,DICER1,DLX2,DROSHA,ENPP1,GPR39,GSE1,HTRA3,IDE,IGF1R,KCTD8,LPGAT1,LRRFIP1,LUZP1,MACF1,MAN1A1,MEF2A,MSL3,MXRA5,NFIB,NNT,NOL6,PARP11,PNMA1,POLR1D,RGS2,RNLS,SHE,SLC1A1,SLC38A9,SLC6A3,SPTLC2,SRSF11,TIGD2,TPST1
palmitic acid		chemical - endogenous mammalian		-0.517		0.00369	ACSL1,CIDEA,FASN,FOS,GAPDH,IDE,LEP,NDUFA5,NR4A3,SPHK1,TNFSF10	215 (24)
miR-4696 (miRNAs w/seed GCAAGAC)		mature microrna	Activated	2.568	bias	0.00374	ANKRD46,CACYBP,CBL,CD93,DICER1,DNAJC15,EDEM1,FBXO9,GPATCH4,ID4,LRRFIP1,MAMDC2,NAA50,NASP,PACSIN2,PIP4K2A,SLC11A2,SOCS6,STEAP4,TCEB3,TIA1,TMX4,TPCN2,TRH,VRK1,ZFX
miR-4257 (miRNAs w/seed CAGAGGU)		mature microrna		0.333	bias	0.00374	AKAP12,ANKRD46,CD93,EHF,ENO2,EYA3,FAS,FPGT,FYN,GCLM,GGA2,GHRHR,GPATCH2,GPX6,HBEGF,HEATR5A,IFIT2,IL10,IRF6,KIF1B,LRTOMT,MAB21L3,MRPS23,NFIA,ODF2L,PECAM1,PEX3,POLR1D,PPP1R3B,RASA1,SHE,STAMBP,TFDP1,TMCC3,TOP2A
MAP3K1		kinase		1.763	bias	0.00376	DUSP1,FAS,FOS,IVL,PLAU,TOP2A	203 (19)
miR-137-3p (and other miRNAs w/seed UAUUGCU)		mature microrna		1.858	bias	0.00381	ABHD5,ABHD6,AIFM2,ANKRD44,ATP2B2,CADM2,CCT6A,CELF2,CXADR,CXCL12,CYYR1,DCP1A,DENND4B,DESI2,FXYD6,GPAM,GPAT3,HCFC2,IDE,IFIT3,KIAA1644,KLF11,LRRC20,LUZP1,MAF,MAP10,MEF2A,MRI1,MS4A2,MTSS1,NFIA,NFIB,NFYC,OSBPL8,PEX3,PHLDB2,PLEKHA8,PPP1R7,PPP6R2,RNLS,RRAGD,RRM2B,SAR1B,SLC19A2,SOCS6,SPTLC2,SRSF6,SS18,TCEA3,TJP2,TMX4,TNFSF10,TPCN2,TRIM3,TTC9,WWP2,ZBTB7A,ZNHIT6
miR-103-3p (and other miRNAs w/seed GCAGCAU)		mature microrna	Activated	2.624	bias	0.00385	ABI3,AKAP12,AMER3,AMOT,ANK3,ANKRD44,AQP11,AREL1,BCLAF1,BHLHE40,BNIP3,BTG2,CDC23,CDC27,CDK5R1,CELF2,DCP1A,DICER1,DNAJC3,EML4,ENC1,ENSA,FAF2,FASN,FBXL20,FGF18,ITGA2,LFNG,LRP1,LRPPRC,LUZP1,MXD4,NFIA,NFIB,PPP6R2,PRSS12,RCAN1,RET,RNLS,S1PR3,SCAMP5,SLC2A3,SLC38A9,SOCS4,SRGAP1,TMEM248,TNFSF10,TPCN2,TSHZ2,TSPAN9,TTC9,TTLL12,WWP1,ZNF382
miR-4289 (miRNAs w/seed CAUUGUG)		mature microrna		0.546	bias	0.00386	ABHD6,BNC1,CADM1,ENC1,ENSA,HOXA1,HYAL1,ISOC1,LRRC8C,MYC,PHACTR1,PTHLH,PTPRR,SAR1B,SLC11A2,SOCS6,TBC1D32,VGLL3,VSTM4
miR-922 (miRNAs w/seed CAGCAGA)		mature microrna	Activated	2.589	bias	0.00387	AAK1,ACSL1,ANK3,AREL1,ARL4A,BNIP3,CADM1,CDC23,CEP44,CSTF1,CYYR1,DICER1,DPT,DTX4,ENC1,ENSA,HYAL1,ID4,LRPPRC,MS4A2,MYO19,NPC2,NRCAM,PATL1,RASA1,RBM25,RMI2,S1PR3,SIMC1,SOCS1,SRSF6,STARD8,TIPIN,TPCN2,USP37,VASH1,VSTM4,WDR33,YLPM1,ZNF280D,ZNF382
Ifnar		group	Inhibited	-2.773	bias	0.00388	FCER1A,IFI16,IFI35,IFIT2,IFIT3,IFITM3,IFNG,TNFSF10	165 (14)
CLOCK		transcription regulator				0.00389	ADPGK,BHLHE40,CEBPA,DNAJB9,FASN,GADD45A,HSPH1,NFIL3,NOCT,NR2C1,WNK4	111 (7)
TRH	1.88	other		-0.083		0.0039	DIO2,DUSP1,F2,FOS,TRH	198 (26)
SOCS1	1.62	other		0.064	bias	0.00391	DUSP1,FAS,FOS,IFI16,IFIT2,IFIT3,IFNG,SNAI1,SOCS1	199 (18)
miR-4668-5p (miRNAs w/seed GGGAAAA)		mature microrna	Activated	2.152	bias	0.00391	AAK1,ALKBH5,AMOT,AP1M1,BNC1,CADM1,CADM2,CCT6A,CDH3,CDS2,COL6A1,COL6A3,DLX2,FGF18,GAS7,GLUL,GPAT3,INTS6,KCNE3,KIAA1644,MEF2A,MSL1,MTF2,PARP9,PIP4K2A,PTP4A2,RBM25,ROCK2,RRS1,RUNDC3A,SNRPF,SS18,STEAP4,TARBP1,TSTD2,UBTF,ZMAT3,ZNF395,ZNHIT6
miR-4515 (miRNAs w/seed GGACUGG)		mature microrna	Activated	2.856	bias	0.00392	ABCB11,ARL4A,BNC1,BRF2,CCDC3,CD3E,DENND4B,ENOPH1,FAF2,FAM65B,GLDN,GPX6,GYS1,HYAL1,IDE,INTS6,IRF6,LPCAT1,LRRC20,MACF1,MCAT,MECR,NFIL3,NRCAM,PLOD1,PODNL1,RNLS,SLC25A22,SOCS6,SPTLC2,TBL3,TBPL1,TMX4,VASH1,WLS,ZER1
miR-4667-5p (and other miRNAs w/seed CUGGGGA)		mature microrna	Activated	2.177	bias	0.00396	AAK1,ABHD6,ADPGK,ATF6B,BBIP1,CBL,CCDC3,CCNA2,CD247,CDS2,CEBPA,COA7,CRY2,CXCL13,CYP19A1,DGUOK,DNAJC15,DTX3L,ENOPH1,ENSA,EYA3,FADS6,FBXL20,FBXO41,FGF18,FXYD6,GRHL2,HBEGF,IVL,LGMN,LRP1,MAT2A,MECR,MEF2C,METTL21A,MRPS23,MSL1,MTHFD1,MXD4,MXRA5,NAA40,NFYC,NGB,OAF,PATL1,PCP4L1,PCSK2,PECAM1,PIK3C2B,PKIG,POLR1D,PPAN,PPRC1,QPCTL,RALGDS,RBFA,RUNDC3A,S1PR3,SCAMP5,SLC38A9,TP53RK,URM1,USP37,VASH1,VSTM4,XPO7,ZBT…
miR-556-3p (miRNAs w/seed UAUUACC)		mature microrna		1.121	bias	0.00397	ACSL1,BBIP1,COG8,CP,ENPP1,HEATR1,IDE,IGF1R,KATNAL1,LYRM4,PEG3,PRELID2,PTHLH,RAB32,S1PR5,SOCS1,TIPIN,TNFSF10
GLI1		transcription regulator		0.24	bias	0.00398	BNC1,FAS,IGF1,KRT19,NR2F2,PHLDA2,PTHLH,RXRA,SNAI1,VEGFA	150 (10)
WNT1		cytokine		-1.633		0.00398	CEBPA,EIF4EBP1,EIF4G1,FOS,GAS1,IGF1,IGF1R,KRT19,MYC,NOTCH4	226 (22)
miR-1247-3p (and other miRNAs w/seed GGGAACG)		mature microrna		0.939	bias	0.00399	ACSL5,ADAR,ANKRD44,CRY2,F2,FAF2,GRHL2,HOXD3,KIAA1551,KLF1,NR1I2,NRCAM,NSFL1C,PATL1,PCSK2,RXRA,SRSF6,TRRAP,TTC9
miR-3926 (miRNAs w/seed GGCCAAA)		mature microrna		0.999	bias	0.004	A1CF,AAK1,ACSBG1,AKAP12,AREL1,BTG2,CDC23,CLDN2,DCP1A,ENPP1,EWSR1,FAM65B,FBXW4,GCLM,GJA4,GLRX,GLUL,GYS1,HCFC2,IGF1,INTS7,KIF1B,LRTOMT,LUZP1,NIP7,OSBPL8,PQLC1,RBL1,RCAN1,TFDP1,TJP2,TOR1A,TOR1AIP2,TSHZ2,TSTD2,TTC9
miR-3945 (miRNAs w/seed GGGCAUA)		mature microrna	Activated	2.249	bias	0.00401	ADGRF2,ANK3,APITD1/APITD1-CORT,B3GALNT1,CADM2,CCP110,CNP,COL6A3,DNAJC3,FAM155B,GADD45A,GPR39,KHK,KIAA1324,KIAA1551,LRTOMT,MS4A2,MSL1,NOTCH4,NR1I2,NT5DC1,PATL1,PCSK2,PEX12,PIPOX,S100PBP,SLC38A9,SS18
ethanol		chemical - endogenous mammalian	Activated	3.014		0.0041	ADM,ANPEP,CEBPA,FAS,FASN,FOS,GADD45A,GPAM,HOXA1,IFNG,IL10,MAT2A,MYC,NMI,PHLDA2,SLC11A2,SNAI1,STAR,STIM1,TRH	249 (22)
miR-296-5p (miRNAs w/seed GGGCCCC)		mature microrna	Activated	3.126	bias	0.00411	AAK1,ACSL5,AP1M1,ASB13,BTG2,CAMK2N2,CBL,CCL21,CDH5,CERCAM,CNP,CYGB,EDEM1,EIF4EBP1,ENSA,FAM107B,FAM193B,FBXO41,FBXO9,FCRL5,GADD45A,GAS7,GJA4,GLYR1,HOXD3,HR,HTRA3,IFIT3,IGF1R,KHK,KIAA1644,LEP,LFNG,LGI4,LPCAT1,LTB,LUZP1,LYRM4,MACF1,MAP3K9,MXD4,NAT9,NR4A3,NSD1,OAF,PDE4DIP,PFKFB3,PGF,PHACTR1,PIK3C2B,PLBD2,PLLP,PODNL1,PPAN,PTOV1,RET,S1PR3,SCAMP5,SLC16A3,SLC25A22,SLC2A1,SLCO2B1,SNAI1,SPTLC2,TCAP,TCF21,T…
miR-3128 (and other miRNAs w/seed CUGGCAA)		mature microrna		1.483	bias	0.00413	ABHD17C,CBL,CDC23,CDC27,CXCL14,DESI2,E2F3,EGLN1,EIF2S1,ENSA,FLT1,HNMT,IGF1R,INTS7,KATNAL1,KIF3A,LRIG3,MSL3,MYOD1,NR2C1,PFKFB3,PTPRG,PTPRK,RRM2B,SLC1A1,SPTLC2,TMEM39A,TMEM86A,TPCN2,VSTM4,WDR33,WDR81,WWP2,YLPM1
leukotriene D4		chemical - endogenous mammalian	Activated	2.425	bias	0.00415	DUSP1,HBEGF,NR4A3,RCAN1,RGS2,ZFP36	214 (23)
PRKCE		kinase		-0.123	bias	0.00415	FCGR1A,FOS,IVL,MYC,STAR,VEGFA	186 (24)
TNFRSF8		transmembrane receptor		-0.42		0.00415	FAS,IFI16,IFNG,IL10,MYC,TNFSF10	165 (20)
USF2		transcription regulator		-1.432	bias	0.00415	CYP19A1,FASN,FCER1A,MYC,OXT,STAR
miR-328-3p (and other miRNAs w/seed UGGCCCU)		mature microrna		1.786	bias	0.00415	ANKRD44,AREL1,CCDC3,CCT6A,CEBPA,CNP,CRNKL1,CXCL12,CYP1A1,DDIT4,DTX4,EIF4EBP1,FAM134A,FAM155B,FAM193B,FBXO41,GLRX,IFNG,IGF1R,LAMC2,LEP,LGR4,LPCAT3,LRTOMT,MAP3K9,METTL21A,MRPS23,MYO19,NSD1,ODF2L,PCP4L1,PEX12,PIP4K2A,PODNL1,PTHLH,RALGDS,RCAN1,RHPN2,RNF40,SLC11A2,SLC2A1,SLC35D2,THOC2,TMEM248,TOR1AIP2,TP53RK,USP37,VASH1,VGLL3,WDR26,WIPF2,ZNF322
IL12 (family)		group		0.767		0.00416	ADAM19,DDIT4,DICER1,IFNG,IL10,KLRC4-KLRK1/KLRK1,NFIL3,SLC2A3,TNFSF10	196 (16)
miR-3180-5p (miRNAs w/seed UUCCAGA)		mature microrna	Activated	3.334	bias	0.00422	ACSL1,AK3,ALDOB,AREL1,ATAD2B,ATRN,CD93,CP,DYNC2LI1,GYS1,HLCS,HRH1,IGF1R,INTS7,LEP,LRRFIP1,LTN1,MAMDC2,NCOA7,NR2C1,NSFL1C,PEX12,PLEKHA8,PRELID2,PSD3,PTP4A2,RCAN3,RRAGD,RXRA,SESN1,SRGAP1,SRSF11,THOC2,TSTD2
Mt1		other		1.119	bias	0.00425	CEBPA,FOS,LEP,MYC	242 (21)
MAP3K3		kinase		0	bias	0.00425	FOS,IFNG,IL10,STEAP4	203 (21)
BRD4		kinase				0.00425	ANKRD37,DMAP1,FOS,MYC
miR-548n (miRNAs w/seed AAAAGUA)		mature microrna		1.444	bias	0.00428	AHCTF1,AK3,CCP110,DESI2,FAIM,FLT1,METAP1,NUP54,PTPRG,RGS2,TNFSF10,YLPM1
N-acetyl-L-cysteine		chemical drug		-0.298		0.00428	ADM,FAS,FOS,GCLM,HBEGF,IFNG,IGF1R,IL10,LEP,PLAU,SNAI1,VEGFA	194 (18)
miR-4794 (and other miRNAs w/seed CUGGCUA)		mature microrna	Activated	3.235	bias	0.0043	AAK1,ADPRHL2,AREL1,ARSA,ATP1B3,CDC27,CEP70,COMMD9,CYFIP2,ENSA,FLT1,GCLM,GLDN,HN1,HNMT,INTS7,KDR,L3MBTL3,LETM1,NOLC1,NR2C1,NSD1,PLEKHA8,QPCTL,SLC19A2,SS18,TMEM248,VSTM4,WIPI1,ZNF674
miR-133a-5p (and other miRNAs w/seed CUGGUAA)		mature microrna		1.534	bias	0.00431	ACSBG1,ACTL6A,ADAMTS3,ARID2,ARL4A,CDC27,CYYR1,FBXO7,FBXW4,FPGT,HRH1,MCUR1,NCOA7,NFIL3,NR2C1,OAF,PLEKHA8,POLR1D,PTPRR,ROCK2,SAMD8,SMC4,STARD8,TOR1AIP2,WBP2
miR-1237-5p (and other miRNAs w/seed GGGGGCG)		mature microrna	Activated	2.56	bias	0.00435	A1CF,ABI3,ADAR,ALOX15,ANPEP,CAMK2N2,CBL,CCDC3,CDA,CDC23,CDK5R1,CDS2,CERCAM,CLN6,COL6A3,COMMD9,CXCL14,DCP1A,DNAJC15,DTX3L,EMB,ENSA,FAM155B,FAM57A,FXYD4,GAS7,GPR39,GSS,HTRA3,HYAL2,IGF1R,INHA,KATNAL1,LETM1,LFNG,LRP1,LRRC20,LRTOMT,LUZP1,MCAT,MYBPC1,MYOD1,NGB,NOL6,NSD1,PECAM1,PIP4K2A,PPP6R2,PQLC1,PTOV1,RBFA,RCAN3,RHPN2,RNF40,RUNDC3A,SCAMP5,SLC6A3,SMOX,TCAP,TCEB3,TNFSF10,TPCN2,TPP1,TSTD2,TTLL12,VEGFA,W…
miR-3473b (and other miRNAs w/seed GGCUGGA)		mature microrna		1.391	bias	0.00437	AAK1,ADPGK,AQP11,ARSA,ATP2B2,ATRN,BHLHE40,BTG2,CCDC3,CDA,CYTH2,DDX42,DESI2,DNAJB9,EIF4EBP1,EXOSC2,FADS1,FADS6,GCLM,HOXD3,INTS7,ITGA2,KIAA1324,KIAA1644,KLRC4-KLRK1/KLRK1,LRP1,MAFF,MAP3K9,MCUR1,MECR,METRNL,MRI1,MS4A2,NFIB,PARP9,PBRM1,PGF,PHACTR1,PIK3R2,PNPLA3,PPP1R3B,PSD3,R3HDM4,RBL1,RCAN3,RNLS,RXRA,S100B,SLC1A1,SLC25A22,SLC2A1,SORBS2,STAMBP,STARD8,TBC1D32,TMEM248,TOR1AIP2,TSHZ2,URM1,VASH1,VSTM4,WW…
methimazole		chemical drug		0.728		0.0044	DIO2,DMBT1,GHRHR,TRH,VLDLR	86 (7)
GDF9		growth factor		-1.482		0.0044	CYP19A1,INHA,ITGA6,PLAU,STAR	180 (17)
RARG		ligand-dependent nuclear receptor				0.0044	CYP19A1,DUSP1,FOS,HOXA1,MYC	234 (21)
miR-376a-3p (and other miRNAs w/seed UCAUAGA)		mature microrna		1.695	bias	0.00442	AAK1,ACSL1,ACSL5,BHLHE40,BNC1,CDK5R1,CELF2,DCP1A,DLAT,FAM171B,HELLS,HLCS,IGF1R,ITGB8,KIAA1324,MEF2A,METTL21A,NAA50,NIP7,PARP11,PATL1,PEX12,PTHLH,SOCS4,SORBS2,TMTC4,TSPAN9,WDR33,ZBTB7A
pyrrolidine dithiocarbamate		chemical reagent		1.344		0.00446	GCLM,IFNG,IGF1,IGF1R,IL10,MYC,PECAM1,SLC2A1	234 (18)
miR-503-3p (and other miRNAs w/seed GAGUAUU)		mature microrna	Activated	3.984	bias	0.00448	ACAT2,ALB,AMD1,B3GALNT1,CD93,CXCL13,DLX2,EML4,EWSR1,FADS1,FAM65B,FLRT2,GPSM2,NNT,NR2C1,PEG3,PLSCR1,RHPN2,SS18,TMX4,VRK1,ZNF280D
GATA6		transcription regulator		-1.431		0.00449	ALOX15,CALML4,CXCL13,CYP19A1,HYAL1,IRF6,MEF2C,NFIA,PECAM1,SLPI,STAR,TNFSF10
miR-1249-3p (and other miRNAs w/seed CGCCCUU)		mature microrna		0.934	bias	0.00449	ATRN,FAM57A,KATNAL1,LETM1,LYRM4,MCAT,MSC,MXD4,NCK2,PGM3,PLAU,PPP6R2,PTOV1,SLC2A3,TRRAP,VEGFA,ZBTB7A
miR-542-3p (miRNAs w/seed GUGACAG)		mature microrna		1.6	bias	0.00452	ANKRD10,BCLAF1,CBL,COA7,DYNC2LI1,FBXL20,FBXO9,GAS7,GPX6,HRG,HYAL1,IRF6,ITGB8,KLF11,LAMC2,LOC102724159/PWP2,LPCAT1,LRTOMT,MID1,MXRA5,NOTCH4,NSFL1C,PHF12,PIK3C2B,PLEKHA8,PRSS12,PYGM,SLC2A3,SPRED1,STIM1,TBPL1,TRAPPC13,TSHZ2,WDR33,YLPM1,ZBTB7A,ZFP1
IL2RG		transmembrane receptor		0.258		0.00456	FOS,IFNG,LTB,MYC,NPC2,SESN1	131 (15)
IFNA1/IFNA13		cytokine		-0.956		0.00456	CYP1A1,IFIT2,IFNG,MYC,PLSCR1,SOCS1	174 (16)
EGLN1	2.18	enzyme	Inhibited	-2.415		0.00456	ADM,IFNG,LEP,MYC,SLC2A1,VEGFA	210 (18)
miR-514a-3p (and other miRNAs w/seed UUGACAC)		mature microrna	Activated	2.225	bias	0.00461	AK3,AMER3,B3GALNT1,BBIP1,FLT1,GPATCH2,HEATR5A,IDE,KATNAL1,LRIG3,NCOA7,NFIB,NR1I2,OAZ2,PEG3,PTHLH,PTPRG,TAC1,TSPAN9,USP37,VGLL3,ZNF674
ginsenoside Rb1		chemical - endogenous non-mammalian				0.00461	FASN,FOS,HBEGF	138 (7)
HRH1	-1.66	g-protein coupled receptor				0.00461	IFNG,IL10,LEP	164 (19)
dactolisib		chemical drug				0.00461	EIF4EBP1,SKP2,SNAI1	160 (11)
NELFB		other				0.00461	COL6A1,GADD45A,VEGFA
PKM		kinase				0.00461	MYC,SLC2A1,TP53RK	233 (22)
HLA-A		other				0.00461	IFNG,MEF2A,MEF2C
HHEX		transcription regulator				0.00461	FLT1,KDR,VEGFA
NOX1		ion channel				0.00461	FLT1,KDR,VEGFA	86 (7)
CDK8		kinase				0.00461	ANKRD37,MYC,RBL1	117 (7)
FURIN		peptidase				0.00461	ADAMTS3,EGLN1,VEGFA	223 (12)
spermidine		chemical - endogenous mammalian				0.00461	AMD1,FOS,KRT19
miR-4509 (miRNAs w/seed CUAAAGG)		mature microrna		1.342	bias	0.00465	DESI2,DICER1,DRAM2,FLT1,GPAT3,HNMT,IFIT2,KATNAL1,LUZP1,MTSS1,MYF6,NFIA,NFIB,RNLS,SAMD8,TOR1AIP2,ZNHIT6
miR-4716-3p (and other miRNAs w/seed AGGGGGA)		mature microrna	Activated	2.4	bias	0.00468	ABHD5,ADAM19,ADAR,AK3,AKAP12,ALKBH5,AMOT,ANTXR2,ANXA5,ATP2B2,CADM1,CD3E,CD93,CDH3,CLEC14A,CLN6,CXCL12,CYGB,CYP19A1,DNAJC15,FBXL20,FGF18,GLRX,GLUL,GRHL2,HR,INIP,INTS6,KDR,KLF11,LPGAT1,MAMDC2,MCAT,MTAP,MTCH2,NSD1,PAPOLA,PCP4L1,PGF,PLLP,RNF40,RXRA,SAMD8,SCAMP5,SOCS1,SOCS4,TCF21,TNFSF13,TOR1AIP2,TSPAN9,TTLL12,UBTF,VASH1,WDR33,WIPI1,WWP2,ZNF395
ATF4		transcription regulator	Activated	2.087	bias	0.0047	CA9,DDIT4,EIF4EBP1,ERO1A,FASN,FYN,GYS1,PENK,SLC3A2,VEGFA	169 (12)
miR-4689 (and other miRNAs w/seed UGAGGAG)		mature microrna	Activated	2.27	bias	0.00473	ABCB11,AMER3,CALML4,CP,CYTH2,EGLN1,ENSA,EYA3,FAM122A,FAM171B,FBXO41,FPGT,GJA4,GLRX,GPX6,HRH1,IGF1,IGSF1,LUZP1,METTL21A,MTAP,PLSCR1,PTP4A2,QSOX1,RASSF1,SLC11A2,SLC2A3,SOCS6,TPP1,TTC9,VSTM4,ZFYVE1
miR-4776-5p (miRNAs w/seed UGGACCA)		mature microrna	Activated	2.652	bias	0.00474	ADGRF2,AMBP,ANKS3,ARL4A,ART3,ATRN,BHLHE40,CDC23,CEP44,CIDEA,CXCL12,FAF2,FAM57A,FBXL20,FPGT,IDE,KRT19,LGR4,NAT9,NRCAM,OSBPL8,QPCTL,RGS2,SCARA5,SOCS6,TCF21,TMEM248,TRAPPC13,VGLL3
miR-1972 (miRNAs w/seed CAGGCCA)		mature microrna	Activated	2.151	bias	0.00477	ANK3,ANTXR2,CALML4,CCDC3,CCT6A,CERCAM,CYTH2,DESI2,DPT,ENO2,FAM57A,FBXO41,FBXO9,FBXW4,FLT1,FXYD4,GGA2,GLT8D1,HRG,ID4,IRF6,KCTD11,LRRC20,MAB21L3,MS4A2,MTAP,NAA40,NCAPG,NGB,NOCT,NOLC1,OAZ2,OSBPL8,PECAM1,POLR3A,PQLC1,RBM25,RGS12,RNF40,RUNDC3A,RXRA,SCAMP5,SCARA5,SHE,SLC25A22,SLC35F2,STBD1,TJP2,TMX4,TOR1AIP2,WDR33,WDR81,XPO7
miR-4323 (miRNAs w/seed AGCCCCA)		mature microrna	Activated	2.015	bias	0.00481	ADGRF2,ADPRHL2,ALKBH5,AMER3,ANK3,ARSA,CALML4,CD93,CEBPA,CEP44,CLDN2,CNP,COG8,COL6A1,COMTD1,CYTH2,FAM155B,FCRL5,FLT1,GYS1,IL10,ITGA6,KIAA1644,KIF1B,MS4A2,MSL3,MYOD1,NASP,NELFA,NGB,NOL6,NSD1,PARP11,PCP4L1,PDE4DIP,PIP4K2A,PLBD2,PQLC1,RBM25,RRM2B,SLC1A1,SLC25A22,SLC35F2,SPTLC2,STAR,STIM1,TCEB3,TMCC3,TMEM45A,TSHZ2,UBTF,VSTM4,WBP2,ZMAT3
miR-935 (miRNAs w/seed CAGUUAC)		mature microrna		0.396	bias	0.00487	AAK1,ANKRD44,ATRN,CDC27,CLEC14A,CSTF1,DLAT,FLT1,HBEGF,HCFC2,HSPH1,MTSS1,NR4A3,PDE4DIP,RBL1,RGS2,SARAF,SCAMP5,SDCBP2,SMC4,SPRED1,TMEM248,WDR33
miR-3152-5p (miRNAs w/seed UUGCCUC)		mature microrna	Activated	2.959	bias	0.00489	AKAP12,ANKRD44,ANKRD46,BAG3,CAST,CCP110,CCT6A,CNP,CXCL13,CYFIP2,DNAJC3,EIF2S1,FAM122A,FLRT2,FLT1,HCFC2,IRF2BP1,LRRC20,NEK2,NR1I2,OSBPL8,PCP4L1,PECAM1,PFKFB3,S100PBP,SLC11A2,SMC4,SORBS2,SS18,VSTM4,XPO7
spironolactone		chemical drug		0.64		0.0049	CIDEA,FASN,PGF,POU1F1,SLCO2B1,STAR,VEGFA	204 (19)
miR-1827 (and other miRNAs w/seed GAGGCAG)		mature microrna		1.217	bias	0.00493	ADAR,AKIP1,ATP1B3,BBIP1,CD247,CELF2,CLDN2,CRY2,CXADR,CYP19A1,DBNDD1,DPF2,EDEM1,ENPP1,EYA3,FAM122A,FAM134A,FAM57A,FAS,FGF18,FLT1,GGA2,HCFC2,HTR1D,IGF1,IGSF1,ITGB8,KHK,KIAA1324,KIF1B,KLF11,KLRC4-KLRK1/KLRK1,LAMC2,LETM1,LPCAT3,LRTOMT,LYRM4,MAP3K9,MAP4K4,MECR,MOAP1,MRI1,MYC,NAA40,NCOA7,NEK2,NOCT,NOLC1,PDE4DIP,PIPOX,PLBD2,PQLC1,QPCTL,QSOX1,RBL1,SAR1B,SESN1,SLC11A2,SLC19A2,SLC27A1,SS18,TMEM201,TNFSF13,…
VHL		transcription regulator	Inhibited	-2.171		0.00494	BNIP3,CA9,PFKFB3,SLC2A1,VEGFA	224 (16)
UCN		other		0.32		0.00499	FOS,IFNG,LEP,STAR	201 (22)
thyroid hormone receptor		group				0.00499	FOS,HR,MYC,OXT	169 (20)
CTSB		peptidase				0.00499	IL10,KDR,MYC,VEGFA	264 (22)
ZBTB17		transcription regulator				0.00499	BHLHE40,NOCT,SOCS1,ZFP36
miR-1302 (and other miRNAs w/seed UGGGACA)		mature microrna		1.048	bias	0.005	APOA4,CBL,CYP19A1,DROSHA,E2F3,ENSA,EYA3,FAF2,FAM134A,FAM188A,FAS,GAS7,GPATCH2,GPATCH4,HILPDA,HOXD3,KIF1B,KLRC4-KLRK1/KLRK1,L3MBTL3,LRRFIP1,MEF2A,METTL21A,NPHS2,PDE4DIP,PIP4K2A,PKIG,PTPRR,PYGM,RCAN3,RHPN2,RNF128,SRGAP1,STARD8,STIM1,TCEB3,TMEM248
miR-3913-5p (and other miRNAs w/seed UUGGGAC)		mature microrna		1.875	bias	0.00501	ABI3,AMER3,APOA4,CBL,CYP19A1,ENSA,FAM188A,GGA2,GPATCH4,HILPDA,HOXD3,LUZP1,MYOD1,NPHS2,PGM3,PIP4K2A,RHPN2,RNF128,TBC1D32,TCEB3,TSTD2,UBTF,VASH1
estrogen receptor		group				0.00501	CYP1A1,DICER1,DNMT1,FOS,IGF1,SNAI1	198 (20)
KLK8		peptidase				0.00501	IFNG,IL10
CRTC3		other				0.00501	LEP,RGS2
FTO		other				0.00501	IGF1,LEP	151 (9)
CCDC3	-1.6	other				0.00501	FASN,LEP
Meg3		other				0.00501	FLT1,VEGFA
SLCO1C1		transporter				0.00501	HR,VEGFA
SSFA2		other				0.00501	IGF1,LEP
Fc receptor		group				0.00501	IFNG,IL10	193 (22)
IL20RB		other				0.00501	IFNG,IL10	220 (20)
CPB2		peptidase				0.00501	IFNG,IL10	83 (7)
mir-365		microrna				0.00501	MYF6,MYOD1
SMARCA1		transcription regulator				0.00501	MYC,STAR
NUCB2		other				0.00501	FOS,TRH
HCRT		other				0.00501	FOS,STAR	121 (12)
ADAMTS1		peptidase				0.00501	CDH5,LAMC2
RBM14		transcription regulator				0.00501	MYC,SKP2
PENK	2.45	other				0.00501	FOS,PENK
CYP11B2		enzyme				0.00501	IGF1R,VEGFA
ARNT2		transcription regulator				0.00501	SLC2A3,VEGFA
PDE10A		enzyme				0.00501	LEP,TAC1	154 (7)
ACP1		phosphatase				0.00501	FOS,MYC	175 (18)
ADORA3		g-protein coupled receptor				0.00501	IL10,VEGFA	134 (12)
CXCL9		cytokine				0.00501	IFNG,IL10	183 (16)
palmatine		chemical toxicant				0.00501	CYP1A1,IL10	96 (7)
miR-4740-3p (miRNAs w/seed CCCGAGA)		mature microrna		1.282	bias	0.00502	AAK1,ATP2B2,CACYBP,CDH5,COL6A3,EIF4G1,FLT1,GAS7,HOXD8,MCUR1,MTAP,NAA50,PDE4DIP,PIK3C2B,RUNDC3A,S1PR3,TMEM248,ZNF395
TLR4		transmembrane receptor		-1.066	bias	0.00502	ADM,CAST,FAS,HBEGF,IFI16,IFIT2,IFIT3,IFITM3,IFNG,IL10,LHB,MYC,NMI,RBL1,RXRA,SOCS1,TNFSF10,TOR1AIP2	172 (18)
miR-4451 (miRNAs w/seed GGUAGAG)		mature microrna		1.199	bias	0.00508	ABHD5,ACSL5,BRF2,DCP1A,DNAJB9,ENSA,FAM171B,FUCA1,GLRX,GPAT3,GTF2F2,HYAL2,LRRFIP1,MACF1,MSL3,PECAM1,PHF12,PODNL1,PPP1R13L,PTHLH,ROCK2,SDCBP2,TCEB3,TNFSF10,WBP2,WDR33
LDLR		transporter				0.00512	A1CF,CEBPA,GJA4,IFNG,IL10,LRP1,MYC,VLDLR	220 (22)
miR-4254 (and other miRNAs w/seed CCUGGAG)		mature microrna		1.917	bias	0.00512	ACSBG1,ACSL1,ADAM19,ADPGK,CDH5,CLK3,DBNDD1,DDX42,DIO2,DPT,E2F3,EIF4G1,EMILIN1,FAM151A,HBEGF,HEATR1,HN1,LEP,LGMN,LMCD1,MID1,MXRA5,NAT9,NGB,PTOV1,QSOX1,RET,RGS12,RNF128,RPS19BP1,RRAGD,S100PBP,SCAMP5,SCARA5,SLC11A2,SLC1A1,SLC2A1,SLC37A4,SLC6A3,SMPD4,SORBS2,TCF19,TCF21,TMEM201,WIPF2,WWP2,XPO7,ZNF692
miR-520d-5p (and other miRNAs w/seed UACAAAG)		mature microrna		0.548	bias	0.00515	ANKRD44,ANKRD46,ATP1B3,ATP2B2,CP,DESI2,DROSHA,INIP,INTS6,KIAA1324,LTN1,MTSS1,NSD1,PFKFB3,RRM2B,SMIM11A,TJP2,TMTC4,TMX4,TRAPPC13,WDR74
miR-3065-5p (and other miRNAs w/seed CAACAAA)		mature microrna		-0.275	bias	0.00515	ARL4A,DNAJC15,EEF1E1,GLUL,GSE1,HNMT,IRF6,KATNAL1,L3MBTL3,NDUFA5,NR2F2,PEX3,PHLDB2,PIPOX,PSD3,RRAGD,SAMD8,SLC19A2,TXNDC15,WDR33,ZMAT3
DMD		other		-1.982		0.00516	BTG2,CYFIP2,EYA3,FAM65B,MAP3K9,MEF2C,MYBPC1,MYOD1,PYGM,SOCS4,STARD10,TCAP
miR-513a-5p (miRNAs w/seed UCACAGG)		mature microrna		1.831	bias	0.00527	ABHD5,ABHD6,ADGRF2,ANTXR2,ARL4C,ASB13,ATAD2B,ATF6B,BUB3,CD2,CLEC14A,COA7,DTX3L,ENC1,ENPP1,FAM65B,GLRX,GPR39,IFNG,KCTD8,MID1,MOAP1,NFIL3,PCSK2,PHF12,POLR1D,RCAN1,RXRA,SAMD8,SARAF,SERPINB11,SLC35F2,SLC6A3,SS18,TMX4,TRUB2,VRK1,WDR33
methamphetamine		chemical drug		1.978		0.00529	CAST,FAS,FOS,IGF1R,MYC,SLC6A3,TAC1	228 (21)
GnRH-A		chemical reagent		1.591		0.00529	ANXA5,BTG2,CIDEA,FOS,LHB,RGS2,ZFP36	188 (17)
GW9662		chemical reagent		1.134		0.00529	CEBPA,EGLN1,FASN,FOS,GPAM,IFNG,KDR	122 (13)
miR-490-5p (miRNAs w/seed CAUGGAU)		mature microrna		0.712	bias	0.0053	ARL4A,CDS2,COL6A1,CXADR,EYA3,FAM65B,FOS,MAP10,MAT2A,MRI1,NDUFAF6,NPHS2,NR2F2,PEG3,PRELID2,PTPRK,RRAGD,S100PBP,TFDP1,TNFSF10,WLS
miR-891b (miRNAs w/seed GCAACUU)		mature microrna		0.646	bias	0.0053	ANTXR2,BAG3,CD93,CRYZL1,DNAJB9,DYNC2LI1,EEF1E1,EGLN1,ENC1,ERO1A,FAM107B,FBXO9,FLRT2,HEATR1,IL10,ITGA2,LRRC8C,MAP3K9,MTF2,MYF6,PTPRR,ROCK2,SNRPF,UBE2T,VGLL3
miR-4487 (miRNAs w/seed GAGCUGG)		mature microrna		0.082	bias	0.00531	ABI3,ALDOB,AMER3,ANKRD10,ANKRD44,ARL4C,CAPG,CEP44,COMMD9,CRNKL1,CRY2,CXCL12,DBNDD1,DTX4,FAM134A,FAM171B,FLT1,FXYD6,GAS7,HOXD8,KCTD11,KIAA1324,LAMC2,LRTOMT,MAP4K4,NANP,NOL6,NPC2,OAF,POLR3A,PTHLH,PTPRK,PTPRR,ROCK2,RRAGD,SLC11A2,SLC6A3,TCEB3,TCF19,TMEM248,TOR1A,TTLL12,USP37,VASH1,WIPF2
miR-4724-3p (and other miRNAs w/seed UACCUUC)		mature microrna		1.271	bias	0.00531	BBIP1,BCLAF1,BMPR1B,CBL,CEP44,ENSA,GPAM,GYS1,INTS6,IRF6,L3MBTL3,MAP10,MOAP1,PEX3,PRELID2,RNLS,SDCBP2,SORBS2,TMEM144,TOR1AIP2,WDR33,ZNF322
miR-633 (miRNAs w/seed UAAUAGU)		mature microrna	Activated	2.782	bias	0.00532	ACSL5,AK3,BUB3,CP,DTX3L,EGLN1,EIF2S1,FBXL20,FLT1,FUCA1,HOXD8,HSPA4,INTS6,NRCAM,RHPN2
miR-502-5p (and other miRNAs w/seed UCCUUGC)		mature microrna		0.596	bias	0.00532	AAK1,ADPGK,ARL4A,CBL,COMMD9,DIO2,DNAJC3,DTX4,ENSA,FADS1,FBXL20,GADD45A,IGF1R,LEP,LUZP1,MAN1A1,MFSD6L,MSL3,OSBPL10,PIPOX,SPRED1,TCEB3,TFDP1,TMCC3,TOB1,TPP1,WIPF2,WNK4,ZFYVE1
miR-651-5p (miRNAs w/seed UUAGGAU)		mature microrna		1.578	bias	0.00536	ANKRD46,BHLHE40,CAST,CBL,DLX2,GAS1,HSPH1,INTS10,INTS6,KLRC4-KLRK1/KLRK1,LTN1,NT5DC1,SESN1,SRSF11,TMEM19,TOR1AIP2,TPST1,ZDHHC14
miR-548an (miRNAs w/seed AAAGGCA)		mature microrna		1.896	bias	0.00537	A1CF,AK3,ANKRD44,ATAD2B,BCLAF1,BHLHE40,CBL,CCDC3,CDC23,EML4,FPGT,FUCA1,HRH1,ITGA6,ITGB8,KIF3A,LRRC8C,MID1,MSL3,MTAP,OSBPL10,PALLD,PAPOLA,PARP9,PBRM1,PFKFB3,PHACTR1,RBL1,SMIM11A,SOCS4,SRSF6,SSB,TJP2,TOR1AIP2,TPCN2,WDR33,ZFX,ZMAT3
miR-1227-3p (miRNAs w/seed GUGCCAC)		mature microrna	Activated	2.528	bias	0.00542	ANTXR2,ATRN,BMPR1B,BNC1,CBL,CYFIP2,DCP1A,DPF2,ENOPH1,FADS1,GPX6,HEATR5A,HOXA1,HOXD3,HTR1D,INIP,KIAA1644,KIF3A,LRTOMT,MAB21L3,MAT2B,MCUR1,MID1,MXD4,NEK2,NSD1,NSFL1C,ODF2L,PCSK1,PNPLA3,PODNL1,PPP6R2,PQLC2,PSD3,RAB32,SLC1A1,STBD1,TOR1AIP2,USP37,VSTM4,ZDHHC14
miR-3140-5p (miRNAs w/seed CCUGAAU)		mature microrna		1.923	bias	0.00543	ANKRD46,BCLAF1,BMPR1B,BNC1,CDH5,DLX2,EIF2S1,HSPA4L,INTS6,LGR4,MAMDC2,MTCH2,MYCBP,NANP,ODF2L,PARP11,QSOX1,SESN1,SLC2A1,TMCC3,TNFSF10,TSPAN9,VGLL3
miR-3686 (and other miRNAs w/seed UCUGUAA)		mature microrna		1.936	bias	0.00545	ACSL5,ACTL6A,AQP11,ATAD2B,BMPR1B,CALML4,CCP110,CDC27,CXCL12,DECR1,FBXO9,GADD45A,GPAT3,L3MBTL3,LTN1,MXRA5,NR2F2,OSBPL8,PBRM1,PEG3,PHF12,PHLDB2,PIP4K2A,POU1F1,SLC25A22,SRSF11,TMEM248,TNFSF10,TOR1AIP2
miR-489-3p (miRNAs w/seed UGACAUC)		mature microrna		1.97	bias	0.00546	ATP1B3,CXADR,DICER1,ENOPH1,FAM65B,FBXO7,GINS4,HBEGF,KDR,LRPPRC,MAF,MID1,NDUFAF6,NFIL3,PEG3,PHACTR1,PTP4A2,TCF21,TIGD2,TP53RK,VSTM4,ZMAT3
CALCA		other		-1.174		0.00547	ALB,ANK3,FLT1,FOS,IGF1,KDR,PHLDB2,TJP2	252 (21)
BNIP3L		other		0.816		0.00549	CCNA2,GADD45A,GPSM2,LTB,RBL1,TOP2A
SERPINF1		other		0.216		0.00549	CDH5,CEBPA,ENO2,IL10,MYC,TNFSF10	249 (27)
miR-4278 (miRNAs w/seed UAGGGGG)		mature microrna		1.18	bias	0.0055	ATP2B2,BMPR1B,CD3E,CD93,CLN6,DLAT,DNAJC15,FAAP24,FBXL20,FGF18,GLRX,HLCS,LTN1,MEF2A,MTAP,NAA50,NCK2,PCP4L1,PGF,PGM3,PTHLH,RNF40,RXRA,SAMD8,STAR,TNFSF13,TOR1AIP2,VASH1,WIPI1,WWP2,YLPM1,ZNF395
K+		chemical - endogenous mammalian		1.109		0.00553	FOS,GAPDH,PENK,STAR,TRH	189 (22)
EP400		other		-1.387	bias	0.00553	CCNA2,NEK2,RASSF1,RBL1,SKP2
miR-4450 (and other miRNAs w/seed GGGGAUU)		mature microrna	Activated	2.555	bias	0.00557	ADGRA3,ADPGK,AKAP12,CLEC14A,CP,CXCL12,DKC1,DNAJC15,DNMT1,DPF2,FBXL20,HEATR1,HR,LRTOMT,MAP4K4,MTAP,NCOA7,PBRM1,PDE4DIP,PGM3,PIPOX,PRSS12,SLC38A9,TNFSF10,TOR1A,TP53RK,TPP1,ZFP36,ZNF280D
miR-4493 (miRNAs w/seed GAAGGCC)		mature microrna		1.74	bias	0.00558	ABCB11,ACSL1,AIFM2,ARID2,ATP2B2,CAST,CDC23,CYP19A1,DBNDD1,DTX4,EBNA1BP2,FBXL20,FBXO41,FCRL5,MTCH2,MXD4,NASP,NOTCH4,NUDT5,ODF2L,PATL1,PCOLCE,RPS19BP1,RXRA,SARAF,SLC37A4,SLCO2B1,SMOX,SNAI1,SPHK1,TIA1,TMCC3,TMEM201,TSTD2,UBE2F,WLS,YLPM1,ZFP36
miR-4652-3p (miRNAs w/seed UUCUGUU)		mature microrna		1.1	bias	0.00558	A1CF,ANK3,ARL4C,CALML4,CBL,DICER1,EGLN1,FXYD6,GADD45A,GPAT3,GRHL2,HOXA1,ITGA2,KIAA1324,LRRC8C,MEF2C,MYC,POU1F1,TMEM201,TMTC4,TNFSF10,TRRAP,VGLL3,WDR33,ZBTB7A
miR-3126-5p (and other miRNAs w/seed GAGGGAC)		mature microrna		0.745	bias	0.00564	AAK1,ABHD5,APITD1/APITD1-CORT,ARHGDIB,BNC1,CDC27,CRY2,DTX4,ENC1,FAF2,GHRHR,GPR39,HBEGF,HNMT,HRH1,INTS6,IVL,KIF1B,NNT,NR2C1,NRCAM,PARP9,PCP4L1,PCSK1,PDE4DIP,PIK3C2B,PRKCZ,PTPRR,RXRA,S100PBP,TMCC3,TMEM201,TMEM248,TRIM3,TSHZ2,TSPAN9,VEGFA,WBP2,ZFYVE1
ID3		transcription regulator		1.195		0.00565	DUSP1,IFI16,IFNG,IL10,IRF6,LTB,MAF,MYC,NR4A3,PIK3C2B,PPAN,TNFSF10	156 (11)
cyclophosphamide		chemical drug		1.145		0.00571	CP,FAS,FOS,IFNG,IL10,LAMC2,MYC	226 (23)
NFATC1		transcription regulator		0.627		0.00571	CYP1A1,FAS,IFNG,IL10,MYC,RCAN1,TNFSF10	152 (17)
miR-572 (miRNAs w/seed UCCGCUC)		mature microrna		-0.253	bias	0.00572	AMER3,ENO2,HTRA3,KIF1B,MAB21L3,MAP4K4,MOAP1,NFIA,PFKFB3,PQLC1,PQLC2,SLC2A3,SOCS1,TJP2,TMEM19,URM1,ZBTB7A,ZDHHC14
miR-4456 (and other miRNAs w/seed CUGGUGG)		mature microrna	Activated	2.873	bias	0.00577	AMER3,AP1M1,CACYBP,CALML4,CEP44,FLRT2,GPATCH2,GRHL2,GSE1,IFIT2,KDR,LPGAT1,LRP1,MAN1A1,MAT2A,MS4A2,MYCBP,NAGPA,NCOA7,NOTCH4,NR4A3,NUDT5,OAZ2,PARP9,PIPOX,PUS1,RUNDC3A,SLC13A4,SNAPC5,STIM1,URM1,USP37,VSTM4,WLS,XPO7
FCGR2A		transmembrane receptor		0.882	bias	0.0058	FAS,IFNG,IL10,VEGFA	170 (17)
ASAH1		enzyme		0		0.0058	NR4A3,SPHK1,SPTLC2,STAR	44 (4)
FXR ligand-FXR-Retinoic acid-RXRα		complex		-1.103	bias	0.0058	ABCB11,FASN,NR1I2,VLDLR
methyl methanesulfonate		chemical toxicant				0.0058	DNMT1,GADD45A,NMI,SNAI1	171 (11)
miR-3688-3p (and other miRNAs w/seed AUGGAAA)		mature microrna		1.435	bias	0.00582	ADAMTS3,AK3,AMOT,CAST,CBL,DNAJC21,ENPP1,FAM122A,HNMT,MEF2C,MOAP1,MTAP,NMI,OAZ2,PEG3,PGM3,SAR1B,SLC26A3,SLC2A3,STAR,THOC2,TJP2,ZNF382,ZNHIT6
isobutylmethylxanthine		chemical toxicant		-0.249		0.00583	CEBPA,ENC1,FOS,GAPDH,IFNG,IL10,MYC,RBL1,RXRA,TRH	251 (25)
Srebp		group				0.00586	ACSL1,FASN,FOS
CHRNA1		transmembrane receptor				0.00586	FAS,IFNG,IL10	153 (17)
GPI		enzyme				0.00586	SKP2,SNAI1,STEAP4	142 (7)
TGFB1I1		transcription regulator				0.00586	FOS,KRT19,SLC6A3
PRKAR2B		kinase				0.00586	FOS,LEP,POU1F1	146 (14)
ACKR3		g-protein coupled receptor				0.00586	ADM,CXCL12,HBEGF	80 (7)
ZFPM1		transcription regulator				0.00586	HBB,IFNG,MS4A2	82 (7)
6-aminopyrazolopyrimidine derivative compound II		chemical - kinase inhibitor				0.00586	IFITM3,IFNG,IL10
pentylenetetrazol		chemical drug				0.00586	FOS,PENK,SLC6A3	90 (7)
onapristone		chemical drug				0.00586	HBEGF,SPHK1,VEGFA
miR-606 (miRNAs w/seed AACUACU)		mature microrna		1.149	bias	0.00594	BHLHE40,BMPR1B,HCFC2,HRG,ITGA2,KIAA1644,KLF11,LTN1,MAF,METTL21A,MTSS1,NT5DC1,ODF2L,PPP1R13L,SOCS4,TMEM144,TOP2A,TOR1AIP2,ZNF280D,ZNF322,ZNF674
IRF8		transcription regulator		1.017		0.00597	CBL,CEBPA,FAS,FOS,IFIT2,IFNG,MAF,MAP4K4,MYC	171 (22)
TSH		complex		1.648		0.00599	FOS,GAPDH,KDR,MYC,SLC2A1,SOCS1	194 (21)
MMP9		peptidase		0.152		0.00599	CXCL12,FOS,GADD45A,IFNG,IL10,MYC	186 (17)
miR-520a-5p (and other miRNAs w/seed UCCAGAG)		mature microrna		1.734	bias	0.00604	ACSBG1,ADAM19,ADGRF2,ANKRD10,AREL1,ATRN,CCDC3,CD2,CD93,CDH3,CP,CXCL13,CYP19A1,CYP1A1,DCP1A,DNAJB9,DROSHA,ENOPH1,EXO1,FADS1,FAM171B,FXYD6,GPSM2,IGF1R,KCTD11,LEP,LRRC20,LTN1,MAN1A1,NOTCH4,PIK3C2B,PRELID2,RALGDS,RNF40,RRAGD,RRM2B,SESN1,SNAI1,TMEM39A,VGLL3,WIPF2
PRL		cytokine	Inhibited	-2.02		0.00607	ADAR,ANXA5,DTX3L,FOS,IDE,IFI35,IFIT3,KRT19,MYC,OXT,PCOLCE,PENK,PKIG,PLSCR1,SOCS1,STAR	228 (24)
miR-3170 (and other miRNAs w/seed UGGGGUU)		mature microrna		0.965	bias	0.0061	AAK1,ABHD5,ADGRF2,COA7,CYP19A1,DNAJC21,EIF2S1,EMB,FAM155B,FBXL20,GINS4,GSE1,HCFC2,HRH1,IVL,LTN1,MAFF,MID1,MSL3,NCOA7,NIP7,PECAM1,PENK,PHLDB2,PQLC2,RBL1,STAMBP,STAR,TCEA3,TCF21,TPP1,TRH,TSHZ2,VSTM4,WIPF2,ZNF630
miR-4281 (miRNAs w/seed GGUCCCG)		mature microrna		-0.015	bias	0.00612	ABHD6,ADAM19,ADM5,ADPRHL2,AKAP9,ANTXR2,CBL,CDS2,CEBPA,COL6A3,CYGB,DDIT4,DLAT,DNAJC3,DUSP1,FAM134A,GAS7,GLDN,GSS,LYRM4,MAFF,NAA40,NAGPA,OSBPL8,PFKFB3,PLEKHA8,QPCTL,SCARA5,TPCN2,TSHZ2,ZNF280D,ZNF322
WT1		transcription regulator		0.068		0.00614	CYP19A1,HBEGF,IGF1,IGF1R,IL10,INHA,LRP1,MYC,PECAM1,VEGFA	215 (20)
Notch		group		1.253		0.00615	ADM,DUSP1,IFNG,IL10,IVL,MYC,VEGFA	186 (21)
corticosteroid		chemical drug		1.387		0.00617	DUSP1,IFNG,IL10,INHA,SLPI	223 (20)
TXNIP		other		1.319		0.00617	CCNA2,DDIT4,FASN,NPHS2,VEGFA	70 (5)
niacinamide		chemical - endogenous mammalian		1		0.00617	DROSHA,FASN,GAPDH,IL10,MYC	225 (22)
MTORC1		complex		-0.219		0.00617	FASN,IFNG,MYC,PFKP,SLC2A1	195 (22)
RXRB		ligand-dependent nuclear receptor				0.00617	ACSL1,FASN,IFNG,IL10,NR2C1	158 (13)
miR-187-3p (miRNAs w/seed CGUGUCU)		mature microrna		1.339	bias	0.00619	COG8,EIF2S1,FAM65B,FLRT2,FLT1,GAS7,GLRX,HRH1,MTAP,MXRA5,SH2B2,SLC6A3,SPRED1,VGLL3
miR-4486 (miRNAs w/seed CUGGGCG)		mature microrna		0.96	bias	0.00622	ADM5,ANK3,CCP110,CD247,CYGB,DTX3L,EMILIN1,FAM134A,FAM183A,FBXL20,FYN,GAS1,GGA2,GLYR1,GRHL2,HTRA3,IFI35,KHK,LAMC2,LRTOMT,LTB,MCUR1,MOAP1,MRI1,MXRA5,MYBPC1,NANP,NEK2,NOCT,PODNL1,R3HDM4,TSPAN9,TTC9,VSTM4,ZNF322,ZNHIT6
fatty acid		chemical - endogenous mammalian		-0.218		0.00623	CIDEA,FADS1,FASN,GPAM,LHB,NR4A3,RXRA,SLC27A1	155 (20)
miR-578 (and other miRNAs w/seed UUCUUGU)		mature microrna		1.38	bias	0.00627	ADAMTS3,ADAR,ANTXR2,ATAD2B,BUB3,CACYBP,CP,DDX42,DICER1,EHF,FLT1,KCTD8,MEF2A,ODF2L,PCSK2,PEG3,PLEKHA8,SLC35F2,TRPT1,VEGFA
miR-208a-3p (and other miRNAs w/seed UAAGACG)		mature microrna		1.06	bias	0.00628	AAK1,ARID2,ATRN,CDC27,EML4,GLYR1,HDAC4,LEP,LRRC8C,MAP4K4,MTF2,MYCBP,NOCT,PHLDA2,PTPRG,TSHZ2
bisphenol A		chemical - endogenous non-mammalian		0.126		0.00632	CXCL12,CYP19A1,ENO2,FOS,IGF1,KDR,LEP,NR4A3,OXT	220 (19)
miR-1224-3p (miRNAs w/seed CCCACCU)		mature microrna		1.726	bias	0.00633	AIFM2,ANKS3,ARSA,ATAD2B,ATF6B,CLDN2,COG8,DNAJC3,DTX4,EDEM1,EXOSC2,FAM65B,GSE1,HILPDA,HLCS,KATNAL1,KDR,KIF1B,LAMC2,LEP,LGMN,LRPPRC,LRRC20,LRRFIP1,MAFF,MECR,MYBPC1,MYCBP,NAA40,NAT9,NDUFA5,NGB,NSD1,NSFL1C,ODF2L,PACSIN2,PECAM1,PLBD2,PLEKHA8,S1PR5,SHE,SLC11A2,SLC27A1,SLC37A4,TCEA3,TCF19,TCF21,TP53RK,TPCN2,TSPAN17,UBTF,VASH1,WIPF2,XPO7
miR-6967-5p (and other miRNAs w/seed AGGGAGG)		mature microrna	Activated	2.505	bias	0.00642	ADAR,ALOX15,AMOT,ARL4C,CADM1,CCDC3,CD3E,CD93,CDS2,CEBPA,CERCAM,CNP,COL6A1,COMMD9,CRY2,CYYR1,DLX2,DNAJC21,DNAJC7,DTX4,ENTPD5,EYA3,FADS1,FAM134A,FAM155B,GLYR1,GRHL2,IGF1,IL10,INHA,KHK,KIF1B,LRP1,LRRC20,LUZP1,MAT2A,MED15,METTL21A,NANP,NFYC,OAF,PAPOLA,PARP11,PHYHD1,PIK3C2B,PSD3,S1PR5,SESN2,SLC27A1,SLC2A3,SPTLC2,SRGAP1,SS18,STEAP4,STIM1,SYCP3,TPP1,TRIM3,TRRAP,TSPAN9,URM1,USP37,WWP2,ZBTB7A,ZFYVE1
miR-4712-3p (miRNAs w/seed AUGAGAG)		mature microrna		1.148	bias	0.00646	CELF2,CEP44,CEP70,CLDN2,CYP19A1,DECR1,DNAJB9,FCGR1A,GRHL2,MID1,MTCH2,NFIA,NRCAM,PHF12,RRAGD,RRM2B,SLC38A9,SLC3A2,SOCS4,ZFYVE1
linoleic acid		chemical - endogenous mammalian		-1.016		0.00654	FASN,KDR,LHB,PECAM1,RXRA,VEGFA	245 (23)
TET2		other		0.378		0.00662	CPN1,FXYD4,IFITM3,IGF1R,ITGA2,KCNE3,MTSS1
WNT5A		cytokine		0.015		0.00662	CXCL12,IFNG,IL10,MYC,MYOD1,RET,TNFSF10	175 (17)
H89		chemical - kinase inhibitor		-1.931	bias	0.00668	CYP19A1,DUSP1,FOS,IGF1,IL10,NFIL3,PLAU,STAR,VEGFA	214 (21)
CD47		transmembrane receptor		0.343		0.0067	IFNG,IL10,KDR,MYC	144 (18)
CHI3L1		enzyme				0.0067	ARL4C,BHLHE40,COL6A1,VEGFA
LCK		kinase				0.0067	CCNA2,CD2,FOS,IFNG	190 (20)
miR-3168 (miRNAs w/seed AGUUCUA)		mature microrna		0.666	bias	0.00675	A1CF,AIFM2,ARID2,GPAT3,HNMT,IL10,MYCBP,NR2C1,PAPOLA,PGM3,PIGC,PRSS12,SF3B1,SLC11A2,TJP2,TMEM19,ZMAT3
miR-1539 (miRNAs w/seed CCUGCGC)		mature microrna		1.783	bias	0.00684	ANKRD10,CD247,COL6A1,DESI2,EML4,FAM65B,GJA4,IGF1,KATNAL1,KIAA1644,MSC,NCK2,NFIA,PACSIN2,PQLC2,QPCTL,RNF40,ROCK2,STARD8,TCF21,ZER1
FOSL2		transcription regulator		0.469		0.00686	DIO2,FAS,IVL,LEP,MYOD1	90 (7)
ADM	1.97	other		-0.029		0.00686	ADM,FOS,PENK,RAMP2,TAC1	229 (20)
MYBL2		transcription regulator		-1.067		0.00686	CCNA2,CEBPA,IFNG,MYC,TOP2A	83 (5)
miR-515-3p (and other miRNAs w/seed AGUGCCU)		mature microrna	Activated	2.705	bias	0.00692	A1CF,ANK3,ARL4A,ASB13,CRYZL1,CXADR,CXCL12,DNAJC15,DTX4,EXO1,FAM134A,FAM188A,GJA4,GPR39,HSPA4L,LRRFIP1,MEF2A,MTCH2,NAA40,NAT9,PHACTR1,PPP1R7,PTPRG,ROCK2,SAR1B,SLC2A1,SORBS2,STAMBP,TAC4,TIGD2,TOB1,TOR1AIP2,TSHZ2,WDR33
miR-4436a (and other miRNAs w/seed CAGGACA)		mature microrna		0.071	bias	0.00702	CYTH2,DENND4B,DKC1,EMB,ENO2,FAM134A,GAS7,GGA2,HTR1D,IRAK1BP1,ITGA2,ITGA6,KIF1B,KIF3A,MAT2B,MSL3,MYC,NAA40,NAA50,NGB,NR2F2,PACSIN2,PATL1,PDE4DIP,PEG3,PFKFB3,PGM3,POLR1D,POLR3A,PTOV1,RGS12,RRAGD,SMPD4,TSPAN17,VSTM4
miR-3678-5p (miRNAs w/seed CCGUACA)		mature microrna	Activated	2.622	bias	0.00702	AIFM2,CADM1,CXADR,ENPP1,MCUR1,MID1,MYCBP,NFYC,NSFL1C,PIK3R2,WWP2
Collagen type I		complex		0.168		0.00711	EIF4EBP1,ITGA2,KDR,MYC,PLAU,SKP2	195 (19)
ATM		kinase		-0.698	bias	0.00711	DUSP1,FAS,GADD45A,IGF1R,LEP,SLC6A3	241 (22)
miR-5107-3p (and other miRNAs w/seed AACCUGU)		mature microrna		-0.75	bias	0.00713	AKIP1,DICER1,EXO1,HEATR1,HN1,ITGA2,ITGA6,MYCBP,NDUFA5,PATL1,PEG3,PHLDB2,PRELID2,ROCK2,S100PBP,S1PR3,SAR1B,SESN1,SIMC1,SLC2A1,SPRED1,STAMBP,STIM1,TOR1AIP2
miR-346 (and other miRNAs w/seed GUCUGCC)		mature microrna		1.391	bias	0.00718	ANKS3,ARSA,CAMK2N2,CERCAM,COG8,DPT,ENOPH1,FADS1,FAM155B,GRHL2,IGF1R,KIF1B,LPGAT1,LUZP1,LYRM4,MEF2A,MEF2C,MS4A2,MXRA5,MYCBP,NCOA7,NFIB,NPHS2,ODF2L,PBRM1,PHLDB2,POLR3A,RASSF1,RET,TRUB2,TTC9,UBTF,URM1,VSTM4,ZER1,ZFP1,ZNF382
miR-3622b-5p (miRNAs w/seed GGCAUGG)		mature microrna		1.311	bias	0.00728	A1CF,AREL1,CDC23,CDH5,CEP44,CLDN2,CXCL12,DENND4B,DPF2,DTX3L,EDEM1,ENC1,ENO2,FBXL20,GAS7,HRH1,INTS6,LRTOMT,MAB21L3,MAP3K9,MSL1,NEK2,PDE4DIP,PHRF1,PLEKHA8,POLR1D,POLR3A,PTPRK,R3HDM4,RET,RMI2,S1PR5,SLC2A1,SPRED1,TMEM86A,TNFSF13,VGLL3,WBP2,XPO7
octanoic acid		chemical - endogenous mammalian				0.0073	CEBPA,FASN,LEP
xanthine		chemical - endogenous mammalian				0.0073	DUSP1,PLAU,SLC2A1	203 (15)
Ptprd		phosphatase				0.0073	CXCL14,IFI35,MYC	160 (7)
SIRT3		enzyme				0.0073	DIO2,IFNG,IL10	154 (7)
CBX4		transcription regulator				0.0073	MYC,RBL1,VEGFA
mir-192		microrna				0.0073	IGF1,IGF1R,TYMS
USP18		peptidase				0.0073	IFNG,SOCS1,TNFSF10	154 (17)
CSF3R		transmembrane receptor				0.0073	CXCL12,FCGR1A,FOS	201 (15)
IL2RB		transmembrane receptor				0.0073	FOS,IL10,MYC	179 (17)
ENPP2		enzyme				0.0073	CIDEA,LEP,SLC2A1
cetrorelix		chemical drug				0.0073	ANXA5,CYP19A1,LHB	88 (7)
arotinoid acid		chemical toxicant				0.0073	DUSP1,FOS,PTHLH	198 (20)
miR-4520-3p (miRNAs w/seed UGGACAG)		mature microrna		1.317	bias	0.00733	A1CF,ALDOB,CRNKL1,CRY2,CSTF1,CYP1A1,DBNDD1,DLAT,EDEM1,GLUL,HSPH1,ID4,KIAA1324,LPGAT1,MS4A2,MSL3,MXD4,NFIA,NFIB,PALLD,PGF,PIP4K2A,PLBD2,PLEKHA8,PTPRK,RCAN1,RRM2B,TJP2,VGLL3,WDR33
POR		enzyme		-1		0.00734	ACAT2,ACSL1,ANTXR2,ANXA5,APOA4,CYP1A1,ENTPD5,HSPH1,KDR,NOCT,PFKFB3,VEGFA
miR-21-3p (and other miRNAs w/seed AACACCA)		mature microrna		0.995	bias	0.00736	AAK1,BCLAF1,DIO2,DNAJC15,DNMT1,EIF2S1,EML4,FASN,GSE1,HLCS,ITGA6,KCTD8,MTF2,PBRM1,PEG3,PENK,PHYHD1,POLR3A,RGS2,RNF128,S1PR3,SAMD8,SARAF,SLC11A2,SLC19A2,SNAPC5,SRSF6,TJP2,TMCC3,TXNDC15,WDR33,ZMAT3,ZNF630
miR-4522 (and other miRNAs w/seed GACUCUG)		mature microrna		1.401	bias	0.00744	ALOX15,CLN6,CRNKL1,DIO2,DROSHA,EWSR1,FADS1,GJA4,GSE1,HNMT,INTS10,KIAA1324,LETM1,LRRC20,MAP3K9,NNT,NOCT,PGM3,PPP1R3B,PPP6R2,S1PR3,TEX2,TIA1,TMEM248,TOR1AIP2,TSPAN9,XPO7
BMP7		growth factor		0.136		0.00747	CEBPA,CIDEA,CYP19A1,FASN,IGF1,IGF1R,PENK,STAR,VEGFA	219 (24)
miR-4718 (miRNAs w/seed GCUGUAC)		mature microrna		1.21	bias	0.0075	ABHD5,ALB,B3GALNT1,BCLAF1,BTG2,CCDC3,CDC23,DYNC2LI1,EGLN1,HEATR1,HOXA1,KHK,KIF1B,MTSS1,NCOA7,NRCAM,OSBPL8,PALLD,PIP4K2A,PXK,RASSF1,RRAGD,STARD8,STBD1,ZNF395
GNA15		enzyme				0.00751	AKAP12,CP,ENPP1,GADD45A,GLUL,MAT2A,MYC,RGS2	103 (12)
halofuginone		chemical drug				0.00753	AKAP12,BHLHE40,CP,CYGB,FCER1A,FXYD6,HSPA4,MS4A2,PCOLCE,PIK3R2
N-formyl-Met-Leu-Phe		chemical reagent				0.00761	ACTL6A,CAPG,FCGR1A,SOCS1,VEGFA	193 (14)
2,4,5,2',4',5'-hexachlorobiphenyl		chemical toxicant		0.378		0.00762	AKAP12,CDS2,FASN,GADD45A,MYC,PIK3R2,THOC2
ITGB1		transmembrane receptor		-1.03		0.00762	BMPR1B,EIF4EBP1,FOS,IFNG,MYC,PLAU,SNAI1	207 (20)
miR-1305 (miRNAs w/seed UUUCAAC)		mature microrna		1.851	bias	0.00765	AMD1,BCLAF1,CCT6A,DLX2,EEF1E1,EGLN1,FADS1,FGG,IGF1,KLF11,MID1,ODF2L,PARP11,RASA1,SAMD8
miR-3156-3p (miRNAs w/seed UCCCACU)		mature microrna		1.275	bias	0.00768	AMOT,ANKRD44,BTG2,COMMD9,CRY2,CXCL12,CYYR1,EGLN1,FCRL5,FXYD6,GLUL,GPAM,GPR39,GPSM2,HNMT,ID4,ITGA2,KIF1B,LAMC2,LRRC20,LTB,MAFF,MEF2C,MTAP,MYF6,NCAPG,NSFL1C,ODF2L,PEG3,PENK,PEX3,PRELID2,SLC35F2,TCEA3,TCF21,TP53RK,TRH,VASH1,ZNF322
INPP5D		phosphatase		1.154		0.00768	CD93,FAS,IFNG,IL10	171 (19)
crocidolite asbestos		chemical toxicant		0.106	bias	0.00768	FOS,GADD45A,GCLM,MYC	232 (21)
HNRNPK		transcription regulator		0		0.00768	ALOX15,ITGA6,MYC,RASA1
8-bromoguanosine 3',5'-cyclic monophosphate		chemical - kinase inhibitor		-1.067		0.00768	FOS,HLCS,INHA,VEGFA	244 (21)
IDH1		enzyme				0.00768	EDEM1,FASN,LEP,SLC2A1	106 (7)
SOX10		transcription regulator				0.00768	FOS,GAS7,ITGA6,RET
PD 123319		chemical drug				0.00768	FASN,KDR,RET,VEGFA	75 (7)
triptolide		chemical drug		1.381		0.00772	CXCL12,DUSP1,FAS,IFNG,IL10,MYC	221 (20)
F2R		g-protein coupled receptor		0.23	bias	0.00772	CXCL12,DUSP1,FLT1,FOS,KDR,VEGFA	223 (21)
CDH1		other		-0.314		0.00772	CDH3,EIF4EBP1,HOXA1,IFNG,KRT19,PFKFB3	96 (7)
miR-199a-5p (and other miRNAs w/seed CCAGUGU)		mature microrna		1.898	bias	0.00795	ABHD17C,ANK3,AQP11,ARID2,BNC1,CBL,CCT6A,CELF2,DNAJC3,DYNC2LI1,E2F3,FADS6,FAM107B,FAM188A,FBXO9,GLUL,GPR39,IFIT2,ITGA8,KIF1B,LAMC2,MCUR1,NAA40,NFYC,NGB,NT5DC1,OSBPL8,PBRM1,PDE4DIP,PEX3,PODNL1,RRAGD,SARAF,SESN1,SESN2,SLC2A1,SMC4,SNAI1,SPTLC2,TBC1D8,TNFSF13,TTC9,USP37,VEGFA
miR-184 (and other miRNAs w/seed GGACGGA)		mature microrna		1.937	bias	0.00796	ADAM19,AMER3,BUB3,DESI2,ENC1,FAM134A,FAM193B,FAM57A,FCRL5,GAS1,IGF1R,KIF3A,LRRC20,MGMT,MRI1,MXD4,NSD1,PPP1R13L,PYGM,SCARA5,SLC25A22,TPP1
miR-4455 (miRNAs w/seed GGGUGUG)		mature microrna	Activated	2.053	bias	0.00798	AQP11,CCP110,CXCL14,DBNDD1,DLAT,DPF2,FBXL20,FLRT2,GPAM,GPATCH2,GSE1,HRH1,KATNAL1,KIF3A,LRP1,LYRM4,MAF,MEF2A,MGMT,MXD4,NCK2,NSFL1C,PARP9,PATL1,PCP4L1,PKIG,RCAN3,RET,SESN2,SLC11A2,SLC27A1,SS18,TCF21,TJP2,TMEM165,TMEM19,TSTD2,TXNDC15,VEGFA,ZBTB7A
miR-4781-3p (miRNAs w/seed AUGUUGG)		mature microrna		-0.034	bias	0.00806	FAM122A,FAS,HILPDA,IFIT2,IGF1,LRRC8C,MTF2,PALLD,PDE4DIP,PLBD2,PTHLH,TMEM165,TNFSF10,WDR33
miR-345-5p (miRNAs w/seed CUGACUC)		mature microrna		0.806	bias	0.00807	ALDOB,DCP1A,EYA3,FAF2,GPATCH4,GSE1,LFNG,MAB21L3,MAT2B,MTF2,MXRA5,NAA50,PBRM1,PCSK1,PDE4DIP,PHF12,SLC11A2,SLC1A1,SRGAP1,STAMBP,TJP2,TOB1,TOR1AIP2,TTLL12
miR-558 (and other miRNAs w/seed GAGCUGC)		mature microrna	Activated	3.695	bias	0.00811	ABCB11,ABHD17C,CADM1,COA7,CSTF1,DPF2,FAM134A,FBXO41,GPATCH2,INTS7,ITIH3,KIAA1324,LFNG,LPGAT1,LRRC8C,LUZP1,NOL6,NOTCH4,NR4A3,NSD1,PODNL1,POLR3A,PUS1,QSOX1,RMI2,SESN1,SLC11A2,SLC35F2,TMEM19,TMEM201,TMX4,TOR1AIP2,TPCN2,TSTD2,TTLL12,WNK4
miR-3063-5p (and other miRNAs w/seed GGAGAUC)		mature microrna		1.851	bias	0.00811	ABHD5,ACSBG1,ATP2B2,CACYBP,CNP,CRADD,DNAJC15,DPT,FASN,FCRL5,GPAM,KCNE3,KIF1B,LEP,LRRC20,LYRM4,NCOA7,PTP4A2,STAR,VSTM4
miR-3134 (miRNAs w/seed GAUGGAU)		mature microrna		0.968	bias	0.00811	ABHD17C,AMOT,ARL4C,CAST,CXADR,DNAJC3,FAF2,INTS6,KLRC4-KLRK1/KLRK1,LRRC8C,MRPS23,PARP11,PECAM1,PLBD2,RASA1,TOB1,TPP1,TSHZ2,TSTD2
NCOR1		transcription regulator		1.4		0.00817	ABCB11,CCNA2,CEBPA,DUSP1,FASN,MYOD1,TRH	160 (20)
budesonide		chemical drug		0		0.00817	CDK5R1,CRADD,FYN,GNA11,MAF,NMI,TCF21
MYB		transcription regulator		-1.408	bias	0.00817	ANPEP,KDR,MAT2A,MTSS1,MYC,RBL1,SPHK1	107 (8)
L-phenylalanine		chemical - endogenous mammalian				0.00819	ALB,FAS
Cpla2		group				0.00819	MYC,VEGFA	161 (10)
1,2,3,4,6,7,8-heptachlorodibenzofuran		chemical toxicant				0.00819	CYP1A1,DNMT1
LGALS12		other				0.00819	CEBPA,LEP
C14orf169		enzyme				0.00819	IGF1,IGF1R
Trbv13-1		other				0.00819	IFNG,IL10
ghrelin		biologic drug				0.00819	FASN,FOS
CSNK2B		kinase				0.00819	MYC,SNAI1
7S NGF		complex				0.00819	FOS,GCLM
PRKD2		kinase				0.00819	ITGA2,KDR	95 (7)
RIDA		enzyme				0.00819	IFNG,IL10
OPRK1		g-protein coupled receptor				0.00819	FOS,KDR	124 (12)
RIPK4		kinase				0.00819	IRF6,IVL
WSB1		other				0.00819	CA9,VEGFA	36 (4)
GNAO1		enzyme				0.00819	FOS,SLC6A3	193 (16)
SUB1		transcription regulator				0.00819	FOS,GADD45A
MYCT1		other				0.00819	EGLN1,MXD4
AFF1		transcription regulator				0.00819	IGF1,MYC
SH2B2	1.81	other				0.00819	FOS,MYC	187 (16)
CUL1		enzyme				0.00819	MYC,SKP2	162 (7)
NDFIP2		other				0.00819	CBL,IFNG
HIVEP2		transcription regulator				0.00819	FOS,MYC	142 (11)
GAPDH	1.54	enzyme				0.00819	GAPDH,IL10
YY2		other				0.00819	FOS,MYC
ACAN		other				0.00819	IFNG,IL10
GCLM	-1.59	enzyme				0.00819	FOS,GCLM
RASA1	-1.53	transporter				0.00819	FOS,PLAU	184 (19)
PCBP1		translation regulator				0.00819	ALOX15,MYC
triiodothyronine, reverse		chemical - endogenous mammalian				0.00819	DIO2,TRH
miconazole		chemical drug				0.00819	NR1I2,STAR
ranitidine		chemical drug				0.00819	IFNG,PENK
2,3,7,8-tetrachlorodibenzofuran		chemical toxicant				0.00819	CYP1A1,DNMT1
2-butenal		chemical toxicant				0.00819	IFNG,IL10	117 (7)
Ki16425		chemical reagent				0.00819	S1PR3,SPHK1
miR-3064-5p (and other miRNAs w/seed CUGGCUG)		mature microrna		0.39	bias	0.00824	AAK1,ADGRF2,ANKRD44,AP1M1,AREL1,ARSA,BTG2,CA9,CCDC3,CNP,COMMD9,CRY2,CYFIP2,CYP1A1,CYTH2,DBNDD1,FAM107B,FBXO41,FBXW4,FCGR1A,FLT1,GLDN,HNMT,IGSF1,IKBKG,KIF1B,LMCD1,MAN1A1,MAP3K9,MCUR1,NAA40,NOLC1,NR1I2,PACSIN2,PGF,PPP1R3B,QPCTL,R3HDM4,SLC19A2,TJP2,TMEM248,TMX4,WBP2
miR-4301 (miRNAs w/seed CCCACUA)		mature microrna	Activated	2.035	bias	0.00826	ANKRD44,CEP44,DPF2,DUSP1,EGLN1,ENSA,FCRL5,GAS7,GLUL,GPSM2,HNMT,MAF,MEF2C,MSL1,NCAPG,NCOA7,PEX3,PRELID2,PRMT9,RCAN1,RNLS,SLCO2B1,SRSF6,STAR,TP53RK
MAPK9		kinase		-0.619		0.00832	CYP1A1,DIO2,FASN,FOS,IFNG,MYC,NMI,RBL1,ZFP36	223 (21)
miR-4511 (miRNAs w/seed AAGAACU)		mature microrna		0.577	bias	0.00835	BRF2,CD93,CRNKL1,HCFC2,HELLS,KIF1B,MAN1A1,PALLD,PLEKHA8,RGS2,S100PBP,STAR,TBC1D32,TCF19,TFDP1,TMEM19,TOR1AIP2,TYMS,ZNF280D
quinolinic acid		chemical - endogenous mammalian		-0.308		0.0084	FOS,MYC,PENK,RET,TAC1	193 (17)
APLN		other		-1.411		0.0084	FOS,IFNG,KDR,MYC,PECAM1	226 (20)
miR-4793-5p (miRNAs w/seed CAUCCUG)		mature microrna	Activated	2.758	bias	0.0084	AQP11,B3GALNT1,CCT6A,CD247,CD93,CEP44,CRY2,ENC1,FAM65B,HSPA4L,IKBKG,INIP,KIAA1644,MAT2B,MGMT,NEK2,PLEKHA8,RGS12,S1PR5,SLC2A3,SLC35D2,TCEB3,TMEM86A,TNFSF10,ZBTB7A,ZFYVE1
miR-1839-5p (and other miRNAs w/seed AGGUAGA)		mature microrna		0.477	bias	0.0084	ACTL6A,AHCTF1,ARL4A,CRNKL1,DENND4B,DRAM2,FAS,FOS,GLUL,HSPA4L,ITGA2,KIF1B,LPCAT3,MAT2A,NSD1,OSBPL8,PIPOX,PLBD2,PRSS12,PTPRR,RMI2,SAMD8,SRSF11,WDR33,XPO7,ZNF322
miR-1256 (miRNAs w/seed GGCAUUG)		mature microrna		0.837	bias	0.00845	BMPR1B,CDS2,COL6A3,DNAJC3,DPT,DRAM2,EIF2S1,FADS1,FLRT2,FUCA1,GLT8D1,HDAC4,HLCS,ISOC1,MAT2A,NOCT,PCSK2,POLR1D,PTPRK,RNLS,S1PR5,SOCS6,ZDHHC14
miR-4661-3p (and other miRNAs w/seed AGGAUCC)		mature microrna		0.948	bias	0.00845	AK3,AREL1,ASB13,CYTH2,FAM188A,FAM57A,HOXD3,ID4,IGF1,IVL,KATNAL1,KCTD8,LEP,LUZP1,MYF6,PPP1R3B,PQLC1,SLCO2B1,STIM1,TCEB3,TJP2,TMEM144,TOR1AIP2,TPST1,TTC9
miR-1237-3p (and other miRNAs w/seed CCUUCUG)		mature microrna		1.749	bias	0.00847	AAK1,ABCB11,AHCTF1,ANK3,BCLAF1,BMPR1B,BUB3,CBL,CCP110,COL6A3,DDX42,DIO2,HBEGF,HOXA1,NSFL1C,PGF,PPP6R2,RBFA,RRS1,SLC2A3,SPRED1,TMEM248,TOR1A,TOR1AIP2,TPST1,TRAPPC12,TRAPPC13,TXNDC15,ZNHIT6
miR-3103-5p (and other miRNAs w/seed GAGGGAG)		mature microrna		1.078	bias	0.00848	AAK1,ADAM19,ADGRF2,ADM5,ALDOB,APITD1/APITD1-CORT,AREL1,ARSA,CADM1,CD3E,CLDN2,COL6A1,CRY2,CYGB,CYP19A1,DTX4,EIF4EBP1,EYA3,GNA11,GPAM,HLCS,IGF1R,INTS6,KCNE3,KIAA1644,KIF1B,LETM1,MSL1,MTSS1,MYCBP,NAA50,NCOA7,NGB,NNT,OAF,PCP4L1,PHLDB2,PIK3R2,PPP1R13L,RASSF1,SCAMP5,SHE,SLC2A3,SPTLC2,STIM1,TAC4,TPP1,TSPAN9,TTC9,VASH1,VEGFA,WBP2,WIPF2,WWP2,ZBTB7A,ZNF395
miR-670-5p (miRNAs w/seed UCCCUGA)		mature microrna	Activated	3.789	bias	0.00854	ANPEP,ASB13,BMPR1B,BUB3,CDH5,CDS2,CLEC14A,CXCL13,CYFIP2,CYTH2,CYYR1,DRAM2,ENPP1,FAM155B,FBXW4,GGA2,GPR39,INTS6,INTS7,KIF1B,LFNG,MID1,MXD4,NAA40,NCK2,NDUFA5,NIP7,NR2C1,PLEKHA8,PRSS12,RET,S1PR5,SCARA5,SRSF6,SS18,TMCC3,TMEM201,TMEM248,ZNF322
miR-4529-5p (miRNAs w/seed GGCCAUC)		mature microrna	Activated	2.115	bias	0.00865	ACSL1,ADAM19,AMBP,BTG2,CSTF1,CYYR1,DMBT1,EGLN1,EIF4G1,FAF2,FAM188A,FAM65B,FBXO9,HRG,HTR1D,IGF1R,ITIH3,LRP1,LRRC20,LRTOMT,NANP,NRCAM,OAF,OSBPL8,PAPOLA,PDE4DIP,RBFA,ROCK2,SARAF,SLC11A2,SLC1A1,SMC4,TMEM201,TSPAN9,TTC9
miR-1233-3p (miRNAs w/seed GAGCCCU)		mature microrna		1.598	bias	0.0087	AAK1,ATF6B,B3GALNT1,BHLHE40,CCDC3,CDS2,CEBPA,CEP70,COL6A1,CRY2,CYP19A1,EDEM1,FCGR1A,GAS7,GLDN,GPATCH4,HSPA4,HYAL2,IFIT2,KIAA1644,LUZP1,MAMDC2,MCAT,MID1,MSL1,MXRA5,NDUFAF6,NEK2,OAF,OAZ2,RET,RXRA,SAMD8,SCAMP5,SMPD4,STIM1,TJP2,TMCC3,TOR1A,WDR81
miR-4446-3p (miRNAs w/seed AGGGCUG)		mature microrna		0.894	bias	0.00873	AAK1,ANTXR2,BNC1,CAST,CD3E,CDA,CDS2,COA7,COL6A1,CXCL12,DIO2,ENOPH1,FAM188A,FBXO41,FBXW4,FXYD6,GAS7,GPR39,HCFC2,HR,HYAL1,IFITM3,LPGAT1,LRRFIP1,LTN1,LUZP1,MAP3K9,MAP4K4,MCAT,NCOA7,NRCAM,PATL1,RBL1,ROCK2,S1PR3,SLC2A1,SLCO2B1,TBC1D8,TMEM201,TOR1AIP2,TPST1,VWDE,WIPF2,ZER1,ZNF322,ZNF395,ZNF630
ERBB3		kinase		-0.314		0.00874	ADAM19,COL6A1,CXCL12,DUSP1,HBEGF,IGF1R,SLPI	220 (20)
Ifn gamma		complex		-0.332		0.00874	ADAR,FLT1,IL10,MAP4K4,MYC,SOCS1,TNFSF10	220 (22)
phorbol 12,13-dibutyrate		chemical - endogenous non-mammalian		1.715		0.00876	CD93,FOS,IGF1R,ITGA2	216 (20)
titanium dioxide		chemical drug		1.192		0.00876	FAS,IFNG,IGF1,INHA
PTCH1		transmembrane receptor		0.849		0.00876	BTG2,GADD45A,MTSS1,MYOD1
PLAUR		transmembrane receptor		-0.655		0.00876	KDR,MYC,PLAU,SOCS1	200 (26)
B2M		transmembrane receptor		-0.943		0.00876	IFNG,IGF1R,MEF2A,MEF2C	178 (7)
ABL1		kinase		-1	bias	0.00876	CCNA2,FAS,MYC,VEGFA	223 (23)
linsidomine		chemical drug		-1		0.00876	ALB,IFNG,MYC,VEGFA	215 (20)
miR-450a-5p (and other miRNAs w/seed UUUGCGA)		mature microrna		0.151	bias	0.00877	AMD1,CCT6A,CYYR1,FBXO9,PHLDB2,PSD3,TCF21,WIPF2,ZFYVE1
MED1		transcription regulator		-0.418		0.00877	ANKRD37,CEBPA,CIDEA,CYP1A1,FASN,GADD45A,IGF1,MYC,MYOD1	235 (22)
miR-292-3p (and other miRNAs w/seed AGUGCCG)		mature microrna		1.852	bias	0.00881	AP1M1,AREL1,BMPR1B,CXADR,CXCL12,FCGR1A,FCRL5,FLT1,GPR39,LRRC20,MCUR1,NAA40,PIPOX,SLC37A4,TOB1,TP53RK,USP37,WDR33
miR-555 (miRNAs w/seed GGGUAAG)		mature microrna		1.556	bias	0.00888	ACSL5,ADAM19,ARHGDIB,DLX2,ENPP1,ERO1A,FAM155B,GGA2,GJA4,HOXA1,INTS6,MAP4K4,PACSIN2,PEG3,PLEKHA8,RBM25,RET,SLC25A22,SPTLC2,WDR26,WDR33,ZNF322,ZNHIT6
calcipotriene		chemical drug				0.00893	FOS,IL10,PLAU	231 (20)
fluoride		chemical - endogenous mammalian				0.00893	FAS,FOS,GADD45A
ETS		group				0.00893	FLT1,FOS,LTB
EHHADH		enzyme				0.00893	ACSL1,FASN,LPCAT3	98 (7)
PLIN1		other				0.00893	ABHD5,FASN,LEP
MMP1		peptidase				0.00893	CXCL12,KDR,MYOD1	225 (18)
PTK2B		kinase				0.00893	FOS,IL10,SOCS1	221 (21)
L-685,458		chemical - protease inhibitor				0.00893	IFNG,NR2F2,PTPRK	80 (7)
nimodipine		chemical drug				0.00893	FOS,LHB,MYC	185 (16)
miR-3569-3p (and other miRNAs w/seed CAGUCUG)		mature microrna		1.587	bias	0.00898	ABHD5,ATP1B3,BNIP3,CD247,CDH5,CDS2,CNP,COG8,CYFIP2,DTX4,EML4,HBEGF,HEATR1,HYAL1,INIP,KIF1B,LAMC2,PAPOLA,PDE4DIP,PKIG,ROCK2,RRAGD,S1PR3,SDCBP2,SLC11A2,SS18,TOR1AIP2,TRUB2
NR1H3		ligand-dependent nuclear receptor		-0.815		0.00899	ARL4C,CIDEA,DIO2,FASN,GPAM,STAR,TRH,VEGFA	162 (22)
miR-3093-3p (and other miRNAs w/seed GUGGACA)		mature microrna	Activated	2.986	bias	0.00903	ADAM19,ALKBH5,ARHGDIB,CCP110,CRNKL1,CSTF1,DPT,EXOSC2,FPGT,GLUL,HELLS,INIP,ISOC1,KIF3A,LUZP1,MAFF,MS4A2,MXD4,NAA40,NFIB,NOLC1,RNLS,S1PR3,SAR1B,SLC35F2,SPHK1,SPTLC2,SS18,TMCC3,VLDLR,WDR81
miR-583 (miRNAs w/seed AAAGAGG)		mature microrna		0.682	bias	0.00905	ALOX15,BNIP3,CADM1,DNAJB9,EML4,FBXO9,GLRX,GPAT3,GSE1,INTS6,LGMN,LRRC8C,NANP,NCOA7,NNT,PIK3R2,POLR1D,S100PBP,SLC38A9,TMEM165
CYR61		other		-0.179	bias	0.00906	ITGA2,KDR,MYC,PLAU,TNFSF10,VEGFA	188 (19)
rottlerin		chemical toxicant		-1.237	bias	0.00906	IFNG,IL10,IVL,RGS2,TJP2,ZFP36	150 (19)
TGFBR1		kinase		-1.342		0.00906	BHLHE40,GAS1,GJA4,ID4,SNAI1,ZFP36	202 (17)
NS-398		chemical reagent		-1.664		0.00906	ALOX15,BTG2,IFNG,IL10,STAR,VEGFA	226 (22)
1,2-dithiol-3-thione		chemical reagent		-0.402		0.00909	ACSL5,APOA4,BNIP3,DNAJB9,DNAJC3,EIF2S1,ENTPD5,GCLM,GNA11,IDE,IKBKG,NOCT,RRS1	51 (4)
miR-4480 (miRNAs w/seed GCCAAGU)		mature microrna	Activated	2.372	bias	0.00921	A1CF,ADGRF2,CDS2,COG8,CYFIP2,CYTH2,EIF2S1,EMB,FADS6,FBXO41,GPAM,GPX6,HLCS,HYAL1,MAT2A,MYCBP,NSFL1C,NUP54,ODF2L,PCSK1,PDE4DIP,PHLDA2,S100PBP,SLPI,SRSF6,STARD8,TCF19,TFDP1,TMEM144
LGALS1		other		1.455		0.00926	HBEGF,IFNG,IL10,LEP,MAF	222 (23)
MAPK7		kinase		-0.025		0.00926	DUSP1,MEF2A,MEF2C,STEAP4,VEGFA	133 (8)
IL25		cytokine		-0.94		0.00926	CCL24,FLT1,IFNG,IL10,KDR	186 (19)
miR-4733-3p (and other miRNAs w/seed CACCAGG)		mature microrna	Activated	2.646	bias	0.00931	ABHD5,AIFM2,ARL4C,CCDC3,CD247,CDH3,CRNKL1,CXCL12,DKC1,DNAJC3,DPF2,ENSA,FLRT2,FOS,IFIT2,IFNG,KCTD11,KIF1B,LETM1,LGR4,LUZP1,LYRM4,MCUR1,MID1,NR4A3,PCSK2,PDE4DIP,PPP6R2,RET,RMI2,RNF128,RNF40,SLC27A1,SPTLC2,TMEM201,TSTD2,VASH1,ZFP36,ZNF322
miR-3664-5p (miRNAs w/seed ACUCUGU)		mature microrna		1.431	bias	0.00933	ATP1B3,CDC27,CEP44,COL6A1,DCP1A,DROSHA,E2F3,EMB,HBEGF,ID4,MTF2,NR4A3,PARP11,PBRM1,PIPOX,PLSCR1,PPP1R3B,RBFA,RNF128,TCF19,THOC2,TOR1AIP2,ZNF674
miR-18a-5p (and other miRNAs w/seed AAGGUGC)		mature microrna	Activated	2.911	bias	0.00937	ANK3,ANXA5,CADM2,CYP19A1,DICER1,E2F3,ENC1,FBXO9,GPAM,HCFC2,HEATR5A,HNMT,HTR1D,IGF1,IKBKG,KIAA1324,LETM1,LRRFIP1,NAA50,NR1I2,PCSK1,PLLP,PRSS12,PSD3,RNLS,SLC35D2,SORBS2,TBPL1,TEX2,TMCC3,TMEM248,TMX4
miR-455-3p (miRNAs w/seed CAGUCCA)		mature microrna		1.451	bias	0.00941	AAK1,ALOX15,ATAD2B,ATP1B3,CD93,FAM171B,FCRL5,GPAM,GPAT3,HN1,KIF3A,LRTOMT,MFSD6L,MS4A2,NFIB,NR2F2,OSBPL8,PARP9,PBRM1,PDE4DIP,PLAU,PODNL1,PRELID2,PTPRK,PTPRR,RRS1,SLC27A1,SS18,TJP2,TOB1,TTC9,UBE2F,WDR26,ZCCHC10
PRKAA2		kinase		0.453		0.00952	ALB,ARHGDIB,CEBPA,CIDEA,CXCL12,LEP,NFIB,PCOLCE	185 (16)
miR-4766-3p (miRNAs w/seed UAGCAAU)		mature microrna		0.586	bias	0.00953	ANKRD44,ANKRD46,DDX42,EEF1E1,EHF,EMB,ENOPH1,FAF2,HSPA4L,LGR4,NFIA,NR2F2,NR4A3,PHLDB2,RNLS,SLC1A1,TCF21,TMCC3,TMEM144,TMEM39A,VEGFA,YLPM1
SMAD4		transcription regulator	Activated	2.06		0.00958	APOA4,CDH5,FOS,GADD45A,IL10,MYC,PTHLH,SNAI1,VEGFA,ZFP36	224 (23)
TWIST1		transcription regulator		0.522		0.00958	CCDC3,COL6A1,CXCL12,EMILIN1,FAS,FOS,ITGA8,PCOLCE,SNAI1,SPHK1	182 (11)
miR-760-3p (and other miRNAs w/seed GGCUCUG)		mature microrna		1.689	bias	0.00959	AKAP12,AMER3,ATAD2B,ATP2B2,ATRN,CBL,CDK5R1,CIDEA,CLK3,COMMD9,CRY2,DBNDD1,DIO2,DTX4,ENSA,FAF2,FAM193B,FBXL20,GJA4,GLDN,GYS1,HBEGF,HN1,IDE,INTS10,IVL,KHK,KIAA1324,LRRC20,LRTOMT,MAFF,NAA50,NDUFAF6,NFIB,NR4A3,NSD1,OSBPL10,RBFA,S1PR3,SLC11A2,STARD8,TCEB3,TCF19,TEX2,TJP2,TMEM201,TMEM248,TSPAN17,URM1,WDR81,WDR93
miR-4519 (miRNAs w/seed AGCAGUG)		mature microrna		0.965	bias	0.00961	ACSL5,AHCTF1,ANK3,ANKRD44,DBNDD1,EMB,ERO1A,FAM193B,GLDN,GRHL2,HEATR5A,HNMT,HOXD8,LPAR3,MAB21L3,MEF2A,METAP1,MSL3,NOTCH4,NR2C1,PATL1,S100B,SLC16A3,SLC1A1,URM1,WBP2,WDR33,ZMAT3,ZNF322
miR-635 (and other miRNAs w/seed CUUGGGC)		mature microrna		0.914	bias	0.00967	ADAM19,ADGRF2,BNC1,CCP110,CRNKL1,DIO2,DRAM2,ERO1A,FAM57A,GHRHR,GINS4,HBEGF,HYAL1,IFIT2,KIAA1644,L3MBTL3,LRTOMT,MAP3K9,MTSS1,ODF2L,OSBPL10,PGM3,POLR1D,SLC11A2,SLCO2B1,STEAP4,TCF19,TJP2,TMEM144,TNFSF10,TOP2A,TOR1AIP2,TSPAN9
miR-3619-3p (miRNAs w/seed GGACCAU)		mature microrna		1.842	bias	0.00972	ART3,ATRN,CDC23,CEP44,CIDEA,COMMD9,CXCL12,DENND4B,HBEGF,HR,IGF1,KCNE3,KRT19,NAA50,NAT9,PGM3,POLR3A,RGS12,RGS2,SCARA5,SOCS6,TMEM165,TMEM248,TRAPPC13,WDR81
miR-3920 (miRNAs w/seed CUGAUUA)		mature microrna		1.108	bias	0.00972	AMOT,ANXA5,ARL4A,DLAT,DRAM2,EHF,EMB,FAM171B,PARP11,PGM3,PHF12,PLEKHA8,RRAGD,SIMC1,TSTD2
miR-3191-3p (miRNAs w/seed GGGGACG)		mature microrna	Activated	2.423	bias	0.00973	A1CF,ASB13,ATF6B,ATP2B2,CD3E,CELF2,COG8,DDX42,DNAJC15,E2F3,EXOSC2,FGF18,FLT1,FXYD6,FYN,HBEGF,KIAA1644,KIF1B,NFIB,NSD1,PNPLA3,R3HDM4,RET,SLC27A1,SOCS4,TBPL1,TCEB3,TCF21,TIA1,TMEM201,TPP1,TSHZ2,TSPAN9,WWP2,YLPM1,ZNF692
androgen		chemical drug				0.00973	BTG2,CXCL13,FOS,IGF1,PTP4A2,PTPRK,SKP2,SOCS1,STIM1	131 (7)
miR-4291 (and other miRNAs w/seed UCAGCAG)		mature microrna	Activated	2.459	bias	0.00977	AAK1,AKAP12,AKAP9,ALDOB,ARL4A,BNIP3,CDC23,CEP44,CSTF1,CYYR1,DBNDD1,ENSA,FAM122A,IFIT2,LPGAT1,LRRFIP1,NT5DC1,PGF,PLLP,PQLC1,PTHLH,PTPRR,RBM25,SCAMP3,SIMC1,SPTLC2,SRSF6,STARD8,STEAP4,TMEM19,TMEM248,TPP1,TSHZ2,USP37,VSTM4,WDR74,YLPM1
cholecalciferol		chemical - endogenous mammalian		0		0.00979	ABCB11,CDA,CEBPA,IGF1,IL10,PTHLH	175 (14)
FOSL1		transcription regulator		-0.64		0.00979	ADM,FOS,IL10,IVL,PLAU,SNAI1	133 (12)
PSEN1		peptidase		-0.228		0.00982	ACSL1,ALB,CDK5R1,CYFIP2,DUSP1,ENO2,ENSA,FOS,GAPDH,IDE,IFNG,IGF1,IL10,LFNG,LRP1,MYC,NDUFA5,S100B,SLC11A2,SOCS1	217 (20)
3,3'-diindolylmethane		chemical drug		1		0.00993	DNMT1,FAS,FASN,IFNG	214 (20)
KNG1		other		0.532		0.00993	FOS,IDE,IGF1,KDR	220 (21)
S-nitroso-N-acetylpenicillamine		chemical reagent		0.14		0.00993	ADM,BNIP3,CXCL12,FAS	212 (22)
CHADL		other		-1		0.00993	CADM1,FAS,MEF2C,STEAP4
carbohydrate		chemical - endogenous mammalian		-1.982	bias	0.00993	FASN,KHK,LEP,PNPLA3	114 (9)
MYBL1		transcription regulator				0.00993	MOAP1,MYC,NEK2,UBE2T
nicotine		chemical drug	Activated	3.084		0.01	FOS,GJA4,IGF1,IL10,IVL,KDR,LEP,PENK,PTHLH,SLC1A1,ZFP36
miR-3150a-5p (and other miRNAs w/seed AACCUCG)		mature microrna		1.324	bias	0.01	BUB3,CEP44,CRY2,NR2F2,SLC2A3,SS18,TIA1,TMEM201,TSTD2,ZFP36
2-deoxyglucose		chemical drug	Activated	2.185		0.0102	DDIT4,FOS,IFNG,LEP,MYC
IFN type 1		group		-1.976		0.0102	CXCL13,IFI16,IFIT2,IFNG,TNFSF10
TREM1		transmembrane receptor		1.177		0.0102	GCLM,HBEGF,IFIT2,IFNG,IL10,LRRC8C,MAFF,MOAP1,OAZ2,PHLDA2,RCAN1,S1PR3
miR-644a (miRNAs w/seed GUGUGGC)		mature microrna		1.869	bias	0.0102	AAK1,ANTXR2,CCL21,CELF2,CEP70,DROSHA,FAM193B,FBXL20,GLDN,KLF1,LGI4,LPCAT1,MEF2A,MRI1,MS4A2,NDUFAF6,NFIA,NFYC,PARP9,PCP4L1,PLAU,PPP1R7,PTPRR,RET,RNLS,S1PR3,SLC11A2,SLC25A22,SLC2A1,SMPD4,SRGAP1,TCF19,TNFSF13,TP53RK,ZER1
mir-223		microrna		0.761		0.0102	CD93,FCER1A,IFI16,IGF1,IGF1R,MEF2C,NFIA,SLC11A2,TOB1
TNFRSF1A		transmembrane receptor		-0.603		0.0102	CXCL13,DIO2,FLT1,GCLM,IFNG,IGF1,KDR,MYOD1,VEGFA
miR-3689d (and other miRNAs w/seed GGAGGUG)		mature microrna	Activated	2.099	bias	0.0103	ADAM19,AMOT,ARSA,CD2,CD247,CLDN2,COA7,CXCL12,DBNDD1,DNAJC7,ENO2,GCLM,GPR39,HOXA1,HOXD3,INTS6,KCTD11,KIAA1644,KIF1B,KLF11,LPAR6,LRRC20,METTL21A,MID1,MSL3,NANP,NFYC,NPC2,OSBPL10,PFKFB3,PITRM1,PLEKHA8,RBFA,S1PR3,SCARA5,SOCS1,SPTLC2,SRGAP1,SS18,TCF19,TFDP1,TOB1,WDR33,WIPF2,ZDHHC14,ZFX
miR-297a-5p (and other miRNAs w/seed UGUAUGU)		mature microrna		1.067	bias	0.0103	AQP11,ATRN,CP,CYP19A1,DIO2,FBXL20,FLT1,MAP3K9,MAT2B,MEF2A,MOAP1,NMB,NNT,NRCAM,PGM3,PRSS12,PTPRG,RNLS,TCEB3,VEGFA,WWP1,ZFX,ZNF280D
miR-589-5p (and other miRNAs w/seed GAGAACC)		mature microrna		1.015	bias	0.0104	ADAR,ALKBH5,CCNA2,CEBPA,CELF2,DPT,FBXO7,HTRA3,IFI35,IGSF1,LPGAT1,MAT2A,MECR,METTL21A,NPC2,NT5DC1,PEG3,RBM25,RCAN1,RCAN3,SLC25A20,TPCN2,TRIP6,WDR33,ZFYVE1
miR-4688 (and other miRNAs w/seed AGGGGCA)		mature microrna		1.919	bias	0.0104	ALKBH5,AP1M1,ATRN,BTG2,CAMK2N2,CDH3,CNP,CRYZL1,CYP1A1,DBNDD1,DPF2,ERO1A,FAM122A,FAS,FBXW4,HR,HTRA3,IDE,IL10,IRF2BP1,KLF1,KLF11,LRRC20,MSC,MYOD1,NAA40,NOL6,NOTCH4,PARP9,PHACTR1,PHF12,RMI2,SAMD8,SLC2A1,SRSF6,STAR,TFDP1,TMEM201,TMTC4,TOR1A,TOR1AIP2,TPCN2,TRH,TSPAN17,UBTF,URM1,VASH1,WBP2,ZER1,ZFP36
miR-4719 (miRNAs w/seed CACAAAU)		mature microrna		0.724	bias	0.0105	ARID2,CADM2,CDS2,EMB,LRPPRC,METAP1,MS4A2,NAA50,NUP54,POLR1D,PRSS12,RASA1,SAMD8,SARAF,SS18,TBC1D32,TBPL1,TMEM39A,USP37
KLF3		transcription regulator		-0.243		0.0105	ADPGK,ANXA5,CAPG,CD93,E2F3,FOS,HBB,HLCS,MCAT,MTCH2,PECAM1,PFKP,PTP4A2,RASSF1,SLC38A9,SS18,TSPAN17,ZDHHC14
miR-383-5p (miRNAs w/seed GAUCAGA)		mature microrna		0.614	bias	0.0105	ANXA5,ARID2,CCDC3,CLDN2,DTX4,EMB,EXO1,FOS,FXYD4,GLDN,IGSF1,KATNAL1,LGR4,MCUR1,ODF2L,PPP6R2,SARAF,SLC35D2,TJP2,TNFSF13,TOP2A,VEGFA,WBP2,WDR33,WIPF2,WNK4
maneb		chemical toxicant		-0.128		0.0106	CCL21,CYP1A1,ITGB8,KIF1B,LAMC2,NFIB
flutamide		chemical drug		-0.391		0.0106	CYP19A1,CYP1A1,FOS,IGF1,KDR,LHB
GLI2		transcription regulator				0.0106	BNC1,CCL24,IFNG,IL10,IVL,MYOD1,SNAI1
PTGER2		g-protein coupled receptor		0.522		0.0107	CCNA2,CYP19A1,IFNG,IL10,NEK2,STAR,TBL3,VEGFA
phenethyl isothiocyanate		chemical drug				0.0107	GCLM,GSS,IFIT2,IFIT3,KDR,QSOX1,RASA1,ROCK2
miR-3182 (miRNAs w/seed CUUCUGU)		mature microrna		1.525	bias	0.0107	ABHD17C,ABHD5,AHCTF1,CBL,CCNA2,CCP110,CEP44,E2F3,EEF1E1,EGLN1,FADS1,FCGR1A,GPATCH4,ITGA2,KATNAL1,MTAP,NR4A3,PEX3,POU1F1,PPP6R2,RNLS,SRSF11,TCF19,TNFSF10
Diphtheria Toxin		chemical reagent				0.0107	HBEGF,PENK,TAC1
GC-GCR dimer		complex				0.0107	DUSP1,IL10,SLPI
NTF4		growth factor				0.0107	FOS,PENK,TAC1
CD46		other				0.0107	IFNG,IL10,SLC2A1
MGAT5		enzyme				0.0107	IFNG,MYC,SNAI1
AQP1		transporter				0.0107	ALDOB,HSPA4L,HSPH1
chloropromazine		chemical drug				0.0107	FOS,IL10,NR4A3
acyclic retinoid		chemical drug				0.0107	FLT1,KDR,MYC
TGAL copolymer		chemical drug				0.0107	IFNG,IGF1,IL10
miR-1324 (miRNAs w/seed CAGACAG)		mature microrna		0.422	bias	0.0108	AKIP1,APOA4,AREL1,ARSA,CELF2,CRY2,EML4,ENSA,FAM107B,GLYR1,HRH1,INTS7,KLF11,L3MBTL3,LRRC8C,MAP3K9,MSL1,MSL3,MYCBP,NEK2,NGB,NOL6,PCSK1,PFKP,PLBD2,SLC19A2,STAMBP,TCEA3,TMEM165,ZNF395
miR-3126-3p (miRNAs w/seed AUCUGGC)		mature microrna		1.271	bias	0.0109	AAK1,ATP1B3,COMMD9,CRADD,DESI2,DRAM2,DYNC2LI1,EGLN1,EIF2S1,GLDN,HN1,HNMT,LRIG3,MSL1,PDE4DIP,PGF,PLEKHA8,PTPRK,RRM2B,SPTLC2,TCEB3,TMEM144,WDR33,WWP1,ZNF692
ID2		transcription regulator		0.555		0.0109	DUSP1,IFI16,IFNG,IL10,IRF6,LTB,MAF,MYC,NR4A3,PIK3C2B,TNFSF10
miR-4255 (miRNAs w/seed AGUGUUC)		mature microrna		1.067	bias	0.0109	ACSL1,ANKRD46,ARL4A,ATP2B2,BBIP1,CP,FAM171B,FLT1,GLRX,HSPH1,IFNG,INTS7,MS4A2,PCSK1,SAMD8,SLC19A2,SRSF6,TCF21,TJP2,ZNF280D
miR-885-3p (miRNAs w/seed GGCAGCG)		mature microrna	Activated	2.225	bias	0.011	ADPRHL2,AHCTF1,AMD1,ATP2B2,CELF2,CXCL12,DBNDD1,FBXO7,FCRL5,GGA2,IGF1R,IRF6,KCNE3,LFNG,LGR4,LYRM4,MGMT,MOAP1,MYO19,NAGPA,PATL1,PIK3R2,PQLC1,R3HDM4,RALGDS,RRS1,SESN1,SLC1A1,SOCS6,TIA1,TMEM201,TMEM86A,TSPAN17,TSTD2,VEGFA,ZDHHC14
miR-3174 (miRNAs w/seed AGUGAGU)		mature microrna		1.809	bias	0.011	ADGRF2,CDS2,CXCL13,DDIT4,DDX42,DICER1,DIO2,EMB,FADS1,LAMC2,MID1,MXRA5,NR2C1,ODF2L,PDE4DIP,PTHLH,SNRPF,TNFSF10,XPO7
miR-3658 (miRNAs w/seed UUAAGAA)		mature microrna		1.297	bias	0.0111	CADM1,CELF2,CYFIP2,FAM107B,GLUL,GTF2F2,NUP54,PGM3,PLEKHA8,SLC11A2,TCF21,TMCC3,UBE2F,ZNF280D
PRKCB		kinase		0		0.0111	FASN,FOS,IL10,MYC,SLC6A3
ADRA1D		g-protein coupled receptor				0.0111	CSRP2,DUSP1,FOS,UBTF,VEGFA
CTF1		cytokine		1.929		0.0112	FASN,FOS,LEP,SOCS1
conjugated linoleic acid		chemical drug				0.0112	CEBPA,DUSP1,IL10,LEP
urethane		chemical toxicant				0.0112	CEBPA,CYP1A1,KDR,MYC
miR-188-3p (miRNAs w/seed UCCCACA)		mature microrna	Activated	3.085	bias	0.0113	ABCB11,AK3,AKAP12,ARL4A,CBL,CXCL12,E2F3,ENSA,FAM122A,FLRT2,FLT1,GGA2,GLUL,GLYR1,GPATCH4,KCTD8,LGR4,LRRC20,LTN1,MAP3K9,MEF2C,MON1A,MRPL32,MSL1,MTAP,PATL1,PCP4L1,PEG3,PNPLA3,QSOX1,RNF128,RRAGC,SAMD8,SESN1,SORBS2,TCF21,TJP2,TOR1AIP2,TRH,TSPAN17,VASH1,WBP2,ZFP1,ZNF674
miR-4449 (miRNAs w/seed GUCCCGG)		mature microrna		0.455	bias	0.0113	ADM,ANTXR2,CYGB,DIO2,DNAJC3,EIF2S1,GLDN,IKBKG,NFIA,PKIG,PPP1R3B,PTP4A2,R3HDM4,RNF40,SESN2,SLC2A3,VSTM4,WDR81,WWP2,XPO7,ZMAT3
miR-4642 (miRNAs w/seed UGGCAUC)		mature microrna		1.22	bias	0.0113	AAK1,AIFM2,AK3,ANKRD10,ARL4C,CADM1,CADM2,CCNA2,DICER1,EIF2S1,FLT1,GADD45A,GPR39,HILPDA,INTS6,MAF,MS4A2,PCSK1,PCSK2,PHACTR1,PHLDB2,PLEKHA8,RNF40,SAMD8,SCARA5,SLC35F2,SORBS2,STAR,TBC1D8
miR-1206 (miRNAs w/seed GUUCAUG)		mature microrna		1.611	bias	0.0113	DNAJC3,EML4,FGF18,HNMT,HOXA1,KCNE3,LOC102724159/PWP2,MAF,METTL21A,MXRA5,MYO19,NSD1,PIP4K2A,PRELID2,PRSS12,RBM25,TOR1AIP2,VSTM4,ZNHIT6
TLR3		transmembrane receptor		-0.881	bias	0.0114	CAST,FAS,FOS,IFI16,IFIT2,IFIT3,IFNG,IL10,NMI,SLPI,TNFSF10
miR-524-3p (and other miRNAs w/seed AAGGCGC)		mature microrna		-0.921	bias	0.0115	ADM5,ANK3,ASB13,CRY2,MAB21L3,NGB,PAPOLA,PHLDA2,PQLC1,S100PBP,SLC37A4,TCEA3,WBP2,WDR26,ZNF395
miR-548av-5p (and other miRNAs w/seed AAAGUAC)		mature microrna	Activated	2.247	bias	0.0115	A1CF,ACAT2,BNIP3,CXADR,CYP19A1,EWSR1,FAF2,HEATR1,IFIT2,ITGB8,MAT2B,NR1I2,PEX3,SLC11A2,SLC19A2,SPTLC2,SS18,TJP2,TOP2A,WWP1
miR-4757-5p (and other miRNAs w/seed GGCCUCU)		mature microrna	Activated	2.979	bias	0.0117	AIFM2,ARHGDIB,ATRN,BTG2,CBL,CD93,CDC23,CDH3,CYP19A1,ENC1,FBXO41,GLYR1,GYS1,IGF1,KCTD11,LPGAT1,LRRC20,LRRFIP1,MID1,MRPS23,MXD4,NAA50,NAT9,NCAPG,NDUFA5,NFYC,NGB,NIP7,PCP4L1,PIK3R2,POLD2,PRSS12,RET,RGS12,RNF40,RPS19BP1,SAMD8,SESN2,SLC19A2,SLC1A1,SLC27A1,STEAP4,STIM1,TCAP,URM1,VASH1,WWP2,ZNF395
miR-885-5p (miRNAs w/seed CCAUUAC)		mature microrna	Activated	2.765	bias	0.0118	ABHD17C,ARID2,ATRN,CRADD,DNAJC15,EML4,EYA3,LAMC2,MACF1,NR2C1,NRCAM,PRMT9,RET,SLC11A2,SLC1A1,SRSF6,WWP1
miR-4471 (and other miRNAs w/seed GGGAACU)		mature microrna	Activated	2.65	bias	0.0118	ACSL5,ADAR,ADPGK,ANKRD10,ANKRD44,CBL,CDS2,CXADR,CYTH2,F2,HOXA1,INTS10,KIAA1551,LAMC2,MAT2A,MTAP,NRCAM,NSFL1C,PCP4L1,PDE4DIP,RET,SOCS4,TCAP,TCF19,TCF21,TRIP6,TRRAP,TTC9,VASH1
miR-3189-3p (miRNAs w/seed CCUUGGG)		mature microrna	Activated	2.786	bias	0.0118	ADAR,ADGRF2,ANKRD44,ATRN,CACYBP,CAMK2N2,CDA,CDH5,CRNKL1,EHF,EML4,ENSA,FAM57A,FBXO41,FPGT,IFIT2,LRRC20,MAP3K9,NASP,NOL6,NR1I2,PARP9,PIK3C2B,PTPRR,S100PBP,S1PR3,SLC35D2,SPTLC2,TCF19,TOR1AIP2,TPP1,TRIM3,TRUB2,VSTM4,WAS,ZNHIT6
miR-3622a-5p (miRNAs w/seed AGGCACG)		mature microrna	Activated	2.196	bias	0.012	AAK1,AMOT,ARID2,ATAD2B,CD93,CEBPA,CYYR1,E2F3,GPX6,GYS1,IFI16,KIF1B,LGR4,LRRC20,MAB21L3,MAP3K9,METTL17,MOAP1,NNT,RBL1,S100B,S1PR3,SS18,TPP1
prostaglandin A2		chemical - endogenous non-mammalian				0.012	IGF1,NR4A3
O6-benzylguanine		chemical drug				0.012	FAS,MGMT
L-lysine		chemical - endogenous mammalian				0.012	ALB,IGF1
P glycoprotein		group				0.012	CD3E,IFNG
Rhox4b (includes others)		transcription regulator				0.012	CDH5,KDR
blinatumomab		biologic drug				0.012	IFNG,IL10
Tcf 1/3/4		group				0.012	ALB,AMBP
DAZ2		translation regulator				0.012	IFITM3,INHA
RO4929097		chemical drug				0.012	KDR,PECAM1
GUCY2C		kinase				0.012	IFNG,LEP
DEF6		other				0.012	FOS,IFNG
HIST1H1C		other				0.012	GAPDH,MYC
CCL18		cytokine				0.012	IFNG,SNAI1
Irs3		other				0.012	FASN,LEP
PLA2G6		enzyme				0.012	RGS2,STIM1
TIA1	-1.59	other				0.012	CCNA2,SKP2
IKBKAP		other				0.012	FLT1,VEGFA
FZD5		g-protein coupled receptor				0.012	IFNG,VEGFA
EPHB6		kinase				0.012	IFNG,IL10
NMU		other				0.012	DIO2,LEP
UBASH3A		enzyme				0.012	IFNG,IL10
BMP5		growth factor				0.012	SNAI1,STAR
PCBP2		other				0.012	CEBPA,MYC
Trbv13-2		other				0.012	IFNG,IL10
AGO2		translation regulator				0.012	CADM1,FOS
FTH1		enzyme				0.012	HBB,IL10
Npy4r		g-protein coupled receptor				0.012	IGF1,LEP
PBX2		other				0.012	FOS,PLAU
S100A7		other				0.012	CA9,VEGFA
fluphenazine		chemical drug				0.012	FOS,NR4A3
pyruvic acid		chemical - endogenous mammalian				0.012	SLC2A3,VEGFA
cerulenin		chemical drug				0.012	FASN,VEGFA
quinapril		chemical drug				0.012	ADM,PTHLH
heroin		chemical drug				0.012	PCSK2,PENK
FBXO32		enzyme		1.912		0.012	CADM1,CSRP2,DNAJB9,DNAJC3,GADD45A,KRT19,PRKCZ
miR-1296-5p (miRNAs w/seed UAGGGCC)		mature microrna	Activated	2.722	bias	0.0121	BRF2,CADM1,COL6A1,CWC22,DCP1A,DLAT,DPF2,EGLN1,EMB,ENOPH1,ENPP1,FBXO41,KATNAL1,LGI4,MAF,MCAT,MTF2,NRCAM,PBRM1,PNPLA3,RNF40,S1PR3,SCARA5,SLC1A1,SOCS4,SPTLC2,TBC1D8,TSHZ2,VASH1,VWDE,WIPF2
sunitinib		chemical drug		1.342		0.0122	COL6A1,CYP1A1,ITGA6,ITGA8,KDR
IKBKE		kinase	Inhibited	-2.205		0.0122	ADAR,IFI16,IFIT2,IFIT3,MYC
ADRA1B		g-protein coupled receptor				0.0122	CSRP2,DUSP1,FOS,LEP,VEGFA
miR-4652-5p (miRNAs w/seed GGGGACU)		mature microrna		1.323	bias	0.0122	A1CF,ATF6B,ATP2B2,BNC1,CD247,CDS2,CELF2,CLDN2,COG8,DDX42,DNAJC15,EXOSC2,FAM155B,FAM65B,FBXL20,FXYD6,FYN,HOXD3,INTS6,KCTD11,KIAA1644,KIF1B,LUZP1,NSD1,PLOD1,PPP1R3B,RET,RUNDC3A,SCAMP3,SESN2,SLC27A1,SRGAP1,STAMBP,TBPL1,TCEB3,TCF21,TIA1,TMEM201,TSPAN9,TTLL12,WWP2,YLPM1
miR-4317 (miRNAs w/seed CAUUGCC)		mature microrna		1.606	bias	0.0122	BRF2,CACYBP,CALML4,CNP,EML4,FAM122A,FAM134A,KDR,LAMC2,LRTOMT,LUZP1,MAMDC2,MOAP1,NEK2,NUP85,RRAGD,SIMC1,TAC1,TOP2A,WIPI1,ZFP36,ZNF322
miR-375-3p (and other miRNAs w/seed UUGUUCG)		mature microrna	Activated	2.546	bias	0.0122	ACSL5,ARL4C,BMPR1B,CADM1,CAST,CDK5R1,HLCS,IGF1R,KCNE3,MYC,NCOA7,PIPOX,SLC11A2,SLC6A3,SOCS4
PIK3R1		kinase		0.808		0.0122	FOS,IFNG,MYC,PIK3R2,SLC2A1,VEGFA
miR-216b-5p (miRNAs w/seed AAUCUCU)		mature microrna		0.444	bias	0.0123	AKIP1,APITD1/APITD1-CORT,BNC1,CDC23,CELF2,CRY2,CXADR,DLX2,DNAJB9,ENC1,FGG,HOXA1,KIF1B,KLRC4-KLRK1/KLRK1,MEF2A,NAA50,NFIA,PEX12,PGM3,PLOD1,POLR1D,RRM2B,RXRA,SAR1B,SOCS6,TEX2,TTC9
miR-4753-5p (miRNAs w/seed AAGGCCA)		mature microrna		1.278	bias	0.0124	ABCB11,ACSBG1,ACSL1,BCLAF1,BNIP3,CBL,CCDC3,CDC23,DBNDD1,DTX4,FBXO9,FCRL5,GNA11,HNMT,KIAA1324,KIF1B,KLF11,MRPS33,NDUFA5,OSBPL8,PARP9,PATL1,PHF12,PLSCR1,RCAN1,RGS2,SCARA5,SHE,SLC27A1,SLC37A4,SOCS6,SPTLC2,TOR1A,TPP1,TSTD2,WLS,ZFX
EBF1		transcription regulator		-0.728		0.0125	CXCL12,EIF4EBP1,FASN,GYS1,NFIL3,PFKP,PIK3R2,SOCS1,SOCS4
PARK2		enzyme		0.849		0.0126	KDR,MYC,SLC11A2,SLC6A3
ABCG1		transporter		0.283	bias	0.0126	CXCL13,IFNG,IL10,SLC2A1
KAT2B		transcription regulator				0.0126	FASN,HBB,IVL,NR2C1
FASLG		cytokine				0.0126	FOS,IFNG,IL10,VEGFA
miR-610 (miRNAs w/seed GAGCUAA)		mature microrna		-0.624	bias	0.0128	AK3,CD247,COMMD9,DLAT,FBXL20,IDE,KIF1B,MEF2A,NDUFAF6,PALLD,PLSCR1,PTHLH,RBL1,RET,RRM2B,S100PBP,SRGAP1,TJP2,TMEM144,TPP1
AGPAT2		enzyme				0.0128	ACSL1,FASN,LEP
KDM4C		enzyme				0.0128	LEO1,MYC,RBL1
fontolizumab		biologic drug				0.0128	FAS,IFI35,IFNG
PTPN2		phosphatase				0.0128	CIDEA,IFNG,IL10
ADRB3		g-protein coupled receptor				0.0128	CXCL12,FOS,LEP
GAL		other				0.0128	FOS,LEP,OXT
LOX		enzyme				0.0128	IGF1R,MYC,SNAI1
FABP5		transporter				0.0128	IFIT3,LEP,VEGFA
S1PR1		g-protein coupled receptor				0.0128	IFNG,IGF1,MAF
HDC		enzyme				0.0128	FOS,IFNG,LEP
IL19		cytokine				0.0128	IFNG,IL10,SOCS1
7-nitroindazole		chemical reagent				0.0128	FOS,IFNG,SLC6A3
W7		chemical reagent				0.0128	FOS,IL10,STAR
miR-1179 (miRNAs w/seed AGCAUUC)		mature microrna		1.276	bias	0.0128	ACSL1,ADGRF2,AKAP9,ANKRD44,CD93,DRAM2,FBXO9,FCER1A,FLRT2,ITGA6,KIAA1551,MEF2C,MOAP1,OSBPL10,PIP4K2A,QSOX1,RASA1,RHPN2,SARAF,SLC19A2,USP37,WWP1
haloperidol		chemical drug	Activated	2.188		0.0128	FOS,NR4A3,PCSK2,PENK,RASA1,TAC1,VEGFA
miR-510-5p (miRNAs w/seed ACUCAGG)		mature microrna		1.982	bias	0.0128	A1CF,ALOX15,ANKRD46,BNC1,CEP44,COMTD1,CSTF1,FBXL20,FBXO41,HOXD8,IDE,KATNAL1,LETM1,LRTOMT,MAF,MAT2A,MID1,OAZ2,PLEKHA8,PNMA1,RET,SLC27A1,SRSF11,SS18,STEAP4,THOC2,TOR1AIP2,TSTD2,URM1,ZDHHC14,ZMAT3
miR-4484 (miRNAs w/seed AAAGGCG)		mature microrna		0.48	bias	0.0129	AMOT,BCLAF1,BHLHE40,CCDC3,CCT6A,PAPOLA,PBRM1,PSD3,USP37,ZCCHC10,ZNF395
miR-127-5p (miRNAs w/seed UGAAGCU)		mature microrna		1.114	bias	0.0131	ABHD17C,ANKRD44,BHLHE40,CADM2,CCT6A,CDC27,CP,EGLN1,FAM122A,FAM171B,FCGR1A,FGG,IFIT3,ITGA6,LRRC20,PHF12,PRELID2,ROCK2,SESN1,SRSF11,TAC1,VGLL3
IFNAR1		transmembrane receptor				0.0131	CCL24,FAM65B,IFI16,IFIT2,IFIT3,IFNG,MYC,SOCS1,TNFSF10
THRA		ligand-dependent nuclear receptor		-0.849		0.0133	CEBPA,FASN,FOS,GHRHR,IGF1,PCSK2,PENK,TRH
9,10-dimethyl-1,2-benzanthracene		chemical toxicant	Activated	2.162	bias	0.0133	CYP19A1,CYP1A1,GADD45A,HBEGF,IL10
anisomycin		chemical - endogenous non-mammalian		1.948		0.0133	CYP1A1,FOS,IL10,PLAU,VEGFA
Ige		complex		-1.095		0.0133	FCER1A,FCGR1A,IFNG,IL10,MYC
omeprazole		chemical drug				0.0133	CELF2,CXCL12,CYP1A1,FOS,ITGA6
miR-3160-3p (miRNAs w/seed GAGCUGA)		mature microrna	Activated	3.225	bias	0.0133	A1CF,ADAMTS3,ADPGK,ALDOB,ANK3,CLDN2,DESI2,DPF2,E2F3,EXOSC2,FADS1,GAS7,HOXA1,HTR1D,ID4,IGSF1,KIAA1324,KIF1B,LPCAT3,LUZP1,MAT2A,MECR,MRI1,NOL6,OSBPL8,PCSK2,PGF,PUS1,SLC11A2,SLC1A1,SLC35F2,SYCP3,TOP2A,XPO7
miR-4764-3p (miRNAs w/seed UAACUCC)		mature microrna		-0.792	bias	0.0133	AAK1,AMD1,ANKRD44,ATAD2B,CBL,CYYR1,DCP1A,DLAT,HCFC2,HYAL1,LEP,LRIG3,MEF2A,PLAU,PSD3,RBFA,RMI2,STEAP4,TMEM39A
miR-876-5p (and other miRNAs w/seed GGAUUUC)		mature microrna		0.622	bias	0.0133	BNC1,CDC27,CLEC14A,CYP1A1,FAF2,GLYR1,IFIT3,INTS6,MAF,NFIA,NSD1,PALLD,PSD3,RRAGD,RRM2B,RXRA,SAMD8,SESN1,SF3B1,SLC1A1,SOCS4,SRGAP1,STEAP4,TNFSF10,TSHZ2,VWDE,ZFYVE1,ZNF322
miR-1470 (miRNAs w/seed CCCUCCG)		mature microrna		0.963	bias	0.0133	ABCB11,ABI3,ATF6B,CD93,CELF2,COL6A3,DDIT4,DNAJC3,E2F3,FADS1,HN1,HR,HTRA3,IFI35,IL10,LPCAT1,LRRC8C,LUZP1,METTL21A,MTAP,NSD1,NUP54,PACSIN2,PXK,S100B,SF3B1,SLC2A3,SLC6A3,SMPD4,STAMBP,TCEB3,TMEM201,TSPAN9,ZNF395,ZNF674
IL21		cytokine		-0.543		0.0134	CCL24,CD2,CXCL13,FAM26F,IFI16,IFIT2,IFIT3,IFNG,IL10,KLRC4-KLRK1/KLRK1,SOCS1
HOXA9		transcription regulator				0.0134	CD93,CELF2,ENPP1,GLRX,IGF1,MYC,NFIA,OSBPL8,PIK3R2,PTPRG,SRSF11
miR-493-3p (miRNAs w/seed GAAGGUC)		mature microrna		-0.702	bias	0.0134	AAK1,ATP1B3,CDC27,CIDEA,HBEGF,HNMT,IGF1,IRF6,LRRC8C,LTN1,NUP54,PARP9,PFKFB3,PIGP,PRELID2,QPCTL,SRSF11,TOR1AIP2,TPP1,WDR33,WDR93,ZMAT3
miR-4461 (miRNAs w/seed AUUGAGA)		mature microrna	Activated	2.059	bias	0.0134	AMOT,APOA4,GCLM,GPAM,IGSF1,INHA,MEF2A,METTL21A,MRI1,MS4A2,ODF2L,PGM3,QPCTL,SLC1A1,SRSF6,TEX2,TMX4,TPP1,TRUB2,WDR33
miR-4787-5p (and other miRNAs w/seed CGGGGGU)		mature microrna		0	bias	0.0135	AAK1,ADM,ARID2,CAMK2N2,FAS,FASN,FGF18,FLT1,GYS1,HTRA3,KRT19,LETM1,MAF,MED15,MXD4,NELFA,NOTCH4,PHACTR1,PIK3R2,PLAU,PLBD2,PPP1R3B,PTP4A2,RGS12,TSPAN9,VLDLR,WWP2,ZBTB7A,ZNF280D
miR-4665-3p (miRNAs w/seed UCGGCCG)		mature microrna		0.38	bias	0.0136	FAAP24,FAM134A,FAM155B,GSE1,HDAC4,NFYC,ODF2L,PFKFB3,PIP4K2A,PQLC2,RCAN3,TNFSF13,TOP2A,WLS
amphetamine		chemical drug		0.578		0.0136	FOS,HN1,HSPA4,IL10,RGS2,SLC6A3,TAC1
morphine		chemical drug		0.609		0.0137	ADM,FAS,FOS,IFNG,IL10,LEP,NPHS2,PENK,SLC1A1
miR-1303 (miRNAs w/seed UUAGAGA)		mature microrna		1.438	bias	0.0139	ABHD5,ACTL6A,AQP11,BUB3,CADM2,CCNA2,CXADR,DIO2,GLDN,IGSF1,KATNAL1,LRRFIP1,MID1,MRPS33,NR4A3,ODF2L,PATL1,PEG3,PIK3C2B,SLC2A1,TMEM144,TOR1AIP2,ZMAT3
alitretinoin		chemical drug		0.018		0.014	ANXA5,CIDEA,DUSP1,FOS,GHRHR,PLAU,RXRA,SLC27A1
Mek		group		-0.046		0.014	ANPEP,FASN,FOS,IL10,IVL,LHB,ROCK2,TOP2A
miR-143-3p (and other miRNAs w/seed GAGAUGA)		mature microrna		0.797	bias	0.014	A1CF,BAG3,CADM2,CBL,CCP110,CDH5,CLN6,DNAJC3,EGLN1,ENPP1,ENSA,FADS6,GRHL2,IFIT3,IGF1R,ITGA6,ITGB8,KIF1B,MAF,MFSD6L,MSL1,NCOA7,PHLDB2,PLAU,PSD3,S100PBP,SAMD8,SLC1A1,SRSF11,TMX4,TOP2A,TOR1AIP2,VASH1,WIPF2
dalfampridine		chemical drug	Activated	2	bias	0.014	BTG2,DUSP1,FOS,MAFF
MMP14		peptidase		0.422		0.014	IL10,LRP1,NNT,VEGFA
CR1L		other		0	bias	0.014	COL6A1,COL6A3,IFNG,IL10
mir-146		microrna		-0.06		0.014	DUSP1,IL10,MYC,SOCS1
SCARB1		transporter				0.014	DDIT4,IFNG,IL10,SESN1
gemfibrozil		chemical drug		-0.649		0.0141	CNP,DECR1,GADD45A,MYC,NR2C1,TPP1
miR-4678 (miRNAs w/seed AGGUAUU)		mature microrna		-0.372	bias	0.0141	ABHD5,ANTXR2,AQP11,AREL1,BAG3,CADM2,CYYR1,DUSP1,ENOPH1,GADD45A,GPR39,ITGA2,LRIG3,LRRC8C,MRPS33,ODF2L,PFKFB3,PFKP,SERPINB11,TOR1AIP2,WDR26
cardiotoxin		chemical - other				0.0143	ACSL5,CCNA2,IGF1,ITGA6,LRRFIP1,MYF6,MYOD1,NASP,PEG3,RBL1
miR-4648 (miRNAs w/seed GUGGGAC)		mature microrna	Activated	2.531	bias	0.0143	ADM5,ALOX15,CELF2,CRY2,DIO2,DTX3L,ENC1,ENO2,FAM134A,FASN,GAS1,HN1,IGF1R,INTS6,IRAK1BP1,ITGA6,KIAA1644,KLRC4-KLRK1/KLRK1,NSFL1C,PECAM1,RHPN2,SLC27A1,SLCO2B1,SMC4,STEAP4,TOR1AIP2,TSTD2,USP37,VEGFA,ZDHHC14,ZFX
capsaicin		chemical drug		1		0.0144	FOS,IGF1,LEP,RXRA,TAC1
ETS2		transcription regulator		-0.447	bias	0.0144	ANPEP,FLT1,MYC,PLAU,PTHLH
Gsk3		group		-1.206		0.0144	CEBPA,FOS,IFNG,IL10,SNAI1
miR-4731-3p (and other miRNAs w/seed ACACAAG)		mature microrna		1.011	bias	0.0145	ABHD17C,ADAMTS3,AKAP9,ANTXR2,ARL4A,CEP44,CLEC14A,CXADR,DKC1,EEF1E1,HNMT,ITGA2,KLF11,MTSS1,NCOA7,NDUFAF6,OAZ2,PEG3,PTPRK,PTPRR,SESN1,SF3B1,TMX4,VLDLR,ZNF382
miR-3654 (miRNAs w/seed ACUGGAC)		mature microrna		-0.494	bias	0.0145	AAK1,ADAR,AMOT,APOA4,CEP44,CRNKL1,CRY2,EDEM1,GPAM,GPX6,HDAC4,INTS6,KCNE3,KIF1B,NCAPG,NT5DC1,POLR1D,SARAF,SERPINB11,SLC2A1,TMEM39A,TMEM86A,TOR1AIP2,TSTD2,VGLL3
gentamicin		chemical drug		1.069		0.0145	ACSM3,BTG2,CSRP2,CYP1A1,DECR1,GADD45A,HBB,IL10,MAF,MGMT,MYC,PLLP,SLC1A1,SSB
miR-1178-3p (miRNAs w/seed UGCUCAC)		mature microrna	Activated	2.486	bias	0.0147	APITD1/APITD1-CORT,ATAD2B,ATP2B2,BCLAF1,CELF2,CNP,CRY2,DNAJC15,ENC1,EWSR1,FADS1,FPGT,GPAM,KIAA1644,KIF1B,LAMC2,LEP,LMCD1,LTN1,MAT2A,MSL3,NFIA,PARP9,PRELID2,S1PR3,TSPAN9,WIPI1,ZNF395
TP73		transcription regulator	Activated	2.173		0.0148	ADAM19,BHLHE40,CADM1,DDIT4,FAS,FASN,GADD45A,IVL,MTHFD1,POLD2,RRM2B,SNAI1,TPP1,TSHZ2,VEGFA,ZMAT3
bleomycin		chemical drug		-1.178	bias	0.0149	CEBPA,F2,FAS,HBEGF,IFNG,IGF1,MID1,MYC,SPHK1,UBE2T
NMDA Receptor		complex				0.015	FOS,PENK,TAC1
GCGR		g-protein coupled receptor				0.015	DUSP1,LEP,SLC6A3
CAST	-2.86	peptidase				0.015	CEBPA,MEF2A,RBL1
AXIN1		other				0.015	CEBPA,ENC1,FOS
MST1R		kinase				0.015	FOS,IFNG,MYC
piceatannol		chemical - endogenous non-mammalian				0.015	EGLN1,FAS,MYC
naltrexone		chemical drug				0.015	IFNG,PCSK1,PCSK2
miR-4457 (miRNAs w/seed CACAAGG)		mature microrna	Activated	2.655	bias	0.015	ADAR,AKAP9,AMOT,AREL1,CBL,CEBPA,CEP44,CXADR,CXCL12,CYFIP2,EIF2S1,ENOPH1,EWSR1,HNMT,IKBKG,MAN1A1,MAT2A,METTL21A,MOAP1,PGM3,PIK3C2B,PTPRR,RBM25,S100PBP,SF3B1,SLC19A2,SS18,TP53RK
trovafloxacin		chemical drug		0.816		0.015	BHLHE40,CEBPA,FASN,FOS,SLC11A2,VEGFA
SOCS3		phosphatase		0.135		0.015	FOS,IFIT2,IFNG,IL10,LEP,SOCS1
MAP2K6		kinase				0.015	IFNG,IVL,MEF2A,MYOD1,PLAU,TNFSF10
miR-1185-5p (and other miRNAs w/seed GAGGAUA)		mature microrna		0.767	bias	0.0151	AK3,ATAD2B,CD93,CRY2,CYGB,DLX2,EHF,FBXO9,FXYD4,FXYD6,GSS,HDAC4,IFITM3,ITGB8,NOLC1,PEX12,SLC2A3,TMEM19,TMTC4,USP37,ZMAT3,ZNF280D
miR-3607-5p (and other miRNAs w/seed CAUGUGA)		mature microrna		1.773	bias	0.0151	A1CF,ADAR,ADGRF2,DICER1,DPT,EDEM1,ENPP1,ERO1A,FCRL5,GLDN,HNMT,KDR,LOC102724159/PWP2,LTN1,NFIA,OAF,OAZ2,OSBPL10,PGM3,PLEKHA8,RCAN3,SIMC1,STEAP4,TOR1AIP2,TXNDC15
NR1H2		ligand-dependent nuclear receptor		-0.655		0.0153	CIDEA,DIO2,FASN,IFNG,STAR,TRH,VEGFA
miR-376c-3p (and other miRNAs w/seed ACAUAGA)		mature microrna		0.584	bias	0.0153	ACSL1,ADGRF2,ANKRD46,ARID2,ATP1B3,BUB3,CLEC14A,EDEM1,EHF,ERO1A,HBEGF,IGF1R,ITGA6,KATNAL1,LPAR3,MAMDC2,MSL3,NFIB,NOLC1,NR2F2,PHLDA2,SAMD8,SLC35D2,SRGAP1,TBC1D8,TCEB3,TMEM19,VLDLR,WDR33,YLPM1
miR-3084-3p (and other miRNAs w/seed UCUGCCA)		mature microrna	Activated	2.194	bias	0.0154	AAK1,ACSL1,ADGRA3,AMOT,AREL1,CYFIP2,DICER1,DPT,EML4,FCRL5,FLT1,GINS4,GRHL2,IDE,IGF1,INTS6,ITGA2,LRRFIP1,MAF,MSL1,NANP,NFIB,NSD1,PALLD,PFKFB3,RBFA,RCAN1,SLC1A1,SLC35F2,TCAP,TMEM86A,TRRAP,TSPAN17,TSTD2,TTC9,VASH1,WWP2,ZER1,ZMAT3,ZNF382
benzyloxycarbonyl-Leu-Leu-Leu aldehyde		chemical - protease inhibitor		-0.926		0.0154	CEBPA,CYP1A1,DUSP1,FAS,IFNG,MYC,NR1I2,RXRA,SKP2,SLC1A1,VEGFA,WAS
miR-1197 (and other miRNAs w/seed AGGACAC)		mature microrna		1.632	bias	0.0155	ACSL5,ANK3,ANKRD10,ARID2,ATP1B3,CBL,DESI2,DNAJC15,DTX4,GCLM,GLDN,HTR1D,KIF3A,MAN1A1,MAP3K9,MAT2A,METAP1,MXD4,PARP9,PSD3,PTPRK,RNLS,RRAGD,SLC2A1,SLC6A3,SRGAP1,STAMBP,TEX2,TPP1
melatonin		chemical - endogenous mammalian		1.48		0.0155	ALOX15,CRY2,FAS,FASN,FOS,IGF1,KRT19,LEP
Sb202190		chemical - kinase inhibitor		-1.003		0.0155	CYP1A1,FOS,IFNG,IL10,IVL,MYOD1,PTHLH,VEGFA
TSC2		other		-1.526		0.0155	CP,ERO1A,FOS,GGA2,IFITM3,IFNG,SLC2A1,ZFP36
HDAC4	2.42	transcription regulator				0.0155	CYFIP2,FOS,GADD45A,HDAC4,MEF2C,NRCAM,RGS2,VEGFA
IFNE		cytokine		-0.218	bias	0.0156	IFIT2,IFNG,IL10,SLC2A1
SU6656		chemical toxicant		-0.849	bias	0.0156	ADM,MYC,NFIL3,VEGFA
DNASE2		enzyme				0.0156	CP,IFIT3,IFNG,TNFSF10
miR-3944-3p (miRNAs w/seed UCGGGCU)		mature microrna		-0.075	bias	0.0156	A1CF,ANPEP,DIO2,HTRA3,ID4,IGSF1,LPCAT1,MAFF,PIK3C2B,PITRM1,SESN2,STBD1,VGLL3,WDR26,WDR33,ZFYVE1,ZMAT3
MAP2K4		kinase		1	bias	0.0156	FOS,GADD45A,MEF2C,PLAU,ROCK2
vitamin D		chemical drug		0		0.0156	CYP1A1,IFNG,IL10,POU1F1,TYMS
miR-4804-5p (miRNAs w/seed UGGACGG)		mature microrna		0.469	bias	0.0157	ADAM19,ARSA,BUB3,DESI2,ENC1,FAM134A,FAM193B,FCRL5,GAS1,GRHL2,INIP,LRRC20,MGMT,MRI1,PPP1R13L,SCARA5
miR-1245b-3p (miRNAs w/seed CAGAUGA)		mature microrna	Activated	2.201	bias	0.0157	AIFM2,ALB,ATRN,CEP70,CRNKL1,CXADR,CYGB,DIO2,DTX3L,DYNC2LI1,GLDN,KHK,KIAA1324,KIF3A,LGR4,MSL3,NAA50,PBRM1,POLR1D,PSD3,RBM25,SLC26A3,STBD1,THOC2,TJP2,VGLL3
miR-3473g (and other miRNAs w/seed AAAAGUG)		mature microrna	Activated	2.209	bias	0.016	ADGRF2,DTX4,FADS1,FAM188A,FLT1,HSPH1,PBRM1,PKIG,SAR1B,SOCS4,SRGAP1,VRK1
miR-4329 (miRNAs w/seed CUGAGAC)		mature microrna		0.752	bias	0.016	AP1M1,ARL4C,ATAD2B,CADM1,CYFIP2,DDX42,DNAJC3,EHF,ENC1,ENOPH1,GSE1,HBEGF,HEATR1,ISOC1,ITGA6,LOC102724159/PWP2,PIPOX,RASSF1,SAMD8,SLC11A2,TIA1,TP53RK,TSPAN9,ZBTB7A
nifedipine		chemical drug		-1.4		0.0161	ATP2B2,FOS,IFNG,STAR,TYMS,VEGFA
miR-3162-3p (miRNAs w/seed CCCUACC)		mature microrna		1.297	bias	0.0163	ABHD5,ADAM19,ADAR,ALKBH5,AMOT,BBIP1,CDC27,CRNKL1,DENND4B,DIO2,EDEM1,ENSA,FADS6,GAS7,GLUL,GPATCH4,IRF6,ITGA2,KCTD11,KIAA1644,MCAT,MSL1,RGS12,RRM2B,SAMD8,SESN2,SHE,STARD8,USP37,ZNF280D,ZNF32
miR-4713-3p (miRNAs w/seed GGGAUCC)		mature microrna	Activated	2.35	bias	0.0165	ANTXR2,BNC1,CERCAM,CLDN2,CNP,FAM65B,FLT1,GINS4,GPX6,KIAA1644,LMCD1,LTN1,MTAP,MXD4,MYCBP,MYO19,NOTCH4,ODF2L,PNPLA3,PPP1R13L,PPRC1,SMOX,STARD8,TCF21,TSHZ2,TSTD2,VSTM4,ZBTB7A,ZFP1,ZNF674
triolein		chemical drug				0.0165	FADS1,FASN
glucosylceramide		chemical - endogenous mammalian				0.0165	IFNG,IL10
L-type Calcium Channel		complex				0.0165	ENPP1,FOS
tocilizumab		biologic drug				0.0165	IFNG,IL10
VTCN1		other				0.0165	IFNG,IL10
PRCP		peptidase				0.0165	PECAM1,TRH
NEIL2		enzyme				0.0165	GAPDH,MYOD1
ADAM21		peptidase				0.0165	MRPL32,TFDP1
NFKBID		transcription regulator				0.0165	IFNG,IL10
Ppp2c		group				0.0165	DNMT1,EIF4EBP1
LITAF		transcription regulator				0.0165	IFNG,IL10
HIPK1		kinase				0.0165	PECAM1,VEGFA
IL23R		transmembrane receptor				0.0165	IFNG,IL10
Inhibin		complex				0.0165	IFNG,LHB
ACLY		enzyme				0.0165	FASN,GPAM
LPAR1		g-protein coupled receptor				0.0165	S1PR3,SPHK1
P2RY1		g-protein coupled receptor				0.0165	FOS,LEP
TPSD1		peptidase				0.0165	IFNG,IL10
AQP4		transporter				0.0165	SLC1A1,SLC2A1
OPRM1		g-protein coupled receptor				0.0165	ADM,IFNG
LTC4S		enzyme				0.0165	IFNG,IL10
Klrk1		other				0.0165	IFNG,IL10
GNMT		enzyme				0.0165	CYP1A1,NPC2
NCR3		transmembrane receptor				0.0165	CD3E,IFNG
raclopride		chemical drug				0.0165	FOS,NR4A3
capsazepine		chemical toxicant				0.0165	FOS,TAC1
4-coumaric acid		chemical - endogenous mammalian				0.0165	CCNA2,MYC
volinanserin		chemical drug				0.0165	FOS,OXT
manumycin A		chemical reagent				0.0165	ANPEP,VEGFA
carbonyl cyanide m-chlorophenyl hydrazone		chemical toxicant				0.0165	IGF1R,PPRC1
diazepam		chemical drug				0.0165	FOS,IFNG
nickel chloride		chemical toxicant				0.0165	GAPDH,VEGFA
miR-3616-5p (and other miRNAs w/seed UGAAGUG)		mature microrna		1.001	bias	0.0166	ATP2B2,CD93,CDC23,CXADR,CYP19A1,DCP1A,E2F3,EGLN1,ENPP1,FGG,ITGB8,LOC102724159/PWP2,LRTOMT,LYRM4,MAB21L3,MXRA5,NASP,NAT9,PDE4DIP,PTHLH,RAB32,RASA1,TSTD2
miR-605-5p (miRNAs w/seed AAAUCCC)		mature microrna		0.148	bias	0.0167	AAK1,ANKRD44,CADM1,CAST,COL6A3,FLRT2,FLT1,GCLM,IRF6,KLF11,LPCAT1,NFIA,POLR3A,PTPRR,SF3B1,SLC11A2,SLC19A2,TEX2,TMCC3,WDR26,ZNF280D
miR-302c-3p (and other miRNAs w/seed AGUGCUU)		mature microrna	Activated	2.661	bias	0.0168	A1CF,AAK1,ASB13,BBIP1,CD2,CELF2,CXCL14,EIF2S1,FAM57A,GLUL,HN1,HNMT,INTS6,MTCH2,MYCBP,MYO19,NIP7,NR4A3,NRCAM,ODF2L,OSBPL8,PHF12,PIP4K2A,RBL1,RRAGD,STBD1,TMEM19,VLDLR,WDR26,ZFP1
IL6ST		transmembrane receptor		0.655		0.0169	ALB,MAF,MYC,RET,SOCS1
FSHR		g-protein coupled receptor				0.0169	CYP19A1,DUSP1,INHA,STAR,VEGFA
glucocorticoid		chemical drug		0.694		0.017	CD2,CYP19A1,DUSP1,FAS,FASN,GLUL,IFNG,IL10,LEP,MYC,PTHLH,SLPI,TRH,VEGFA
miR-1272 (miRNAs w/seed AUGAUGA)		mature microrna		1.302	bias	0.0171	A1CF,CEP70,COA7,DYNC2LI1,EML4,FLT1,LETM1,MAF,MID1,MS4A2,RBM25,RRM2B,SAR1B,SLC19A2,TXNDC15,USP37,VGLL3,ZFYVE1
miR-1268a (and other miRNAs w/seed GGGCGUG)		mature microrna	Activated	2.192	bias	0.0171	ADM5,ADPGK,AHCTF1,ALKBH5,CD247,FBXL20,FCRL5,GGA2,GRHL2,HR,HTR1D,INHA,LPGAT1,LRTOMT,MCUR1,MOAP1,MXD4,NANP,NOCT,PODNL1,POLR1D,SCAMP3,SLC35F2,SOCS4,SRGAP1,TMEM201,TOR1AIP2,TTLL12,WDR81,WWP2
IL6R		transmembrane receptor		0.223	bias	0.0172	IGF1,IL10,PENK,TAC1,TRH,VEGFA
DUSP1	1.74	phosphatase		-0.293		0.0172	CIDEA,DUSP1,IL10,LHB,SOCS1,ZFP36
green tea polyphenol		chemical drug		0		0.0173	FOS,IGF1,PLAU,VEGFA
H-7		chemical - kinase inhibitor		-0.334	bias	0.0173	CYP1A1,FOS,MYC,STAR
TEAD4		transcription regulator				0.0173	FLT1,RCAN1,SLC2A3,VEGFA
NR2F2	-2.03	ligand-dependent nuclear receptor				0.0173	APOA4,KDR,NR1I2,VEGFA
ELOVL5		enzyme				0.0174	FADS1,FASN,GPAM
FGFR4		kinase				0.0174	FOS,KDR,PLAU
DAG1		transmembrane receptor				0.0174	CDH5,CNP,SLC2A1
SP100		transcription regulator				0.0174	HBB,PLAU,SNAI1
MTM1		phosphatase				0.0174	BNIP3,EIF4EBP1,IGF1R
MAPK12		kinase				0.0174	FOS,IL10,ITGB8
HDAC6		transcription regulator				0.0174	CYP1A1,IFNG,IL10
KISS1R		g-protein coupled receptor				0.0174	FOS,RCAN1,TMEM144
isoprenaline		chemical drug				0.0174	FOS,NR4A3,SLC2A1
acetaldehyde		chemical - endogenous mammalian				0.0174	FOS,MYC,SMOX
idarubicin		chemical drug				0.0174	GADD45A,SESN1,SESN2
miR-3942-5p (and other miRNAs w/seed AGCAAUA)		mature microrna		1.304	bias	0.0174	BBIP1,DDX42,EDEM1,EHF,EIF2S1,ENOPH1,ERO1A,FAM26F,GCLM,GSE1,HDAC4,HSPA4L,NANP,NIP7,NR2F2,PARP11,PHLDB2,PTP4A2,PTPRG,SLC1A1,SLCO2B1,STAMBP,TCF21,THOC2,TMEM39A
MYD88		other		-0.79	bias	0.0175	ACSL1,AK3,CXCL12,CXCL13,DUSP1,FOS,IFIT2,IFNG,IGF1,IL10,MAFF,MYC,SLC16A3,SOCS1
IL18		cytokine		-0.362	bias	0.0176	ADAM19,CXCL12,DDIT4,FAS,IFNG,IL10,KLRC4-KLRK1/KLRK1,NFIL3,SLC2A3,VEGFA
miR-3072 (and other miRNAs w/seed GCCCCCU)		mature microrna	Activated	2.556	bias	0.018	ADGRF2,AMD1,ATAD2B,BRF2,CCDC3,CIDEA,COA7,COMMD9,CXCL12,EIF4G1,FADS6,FAM155B,FBXO41,GAS1,GCLM,GHRHR,GLRX,GSE1,HDAC4,HR,HTR1D,IFIT3,IGF1,ITGA2,L3MBTL3,LRPPRC,LRRC20,LRRFIP1,LUZP1,MYO19,NAT9,NMRAL1,PGF,PHF12,PHRF1,PODNL1,PQLC1,PSD3,QSOX1,RET,RNF40,RXRA,S1PR3,SCAMP5,SLC25A22,SLC35D2,STAMBP,STARD8,TMEM201,TMEM86A,TRH,TSPAN9,UBTF,USP37,VEGFA,WBP2,WDR46,WDR81,WIPI1,WNK4,XPO7,ZNF692
KDM5B		transcription regulator		0.426		0.018	BUB3,GADD45A,NMB,PSD3,RNF40,SMOX,SS18,TNFSF13,TOP2A
miR-4720-3p (miRNAs w/seed GCUUAAG)		mature microrna	Activated	2.522	bias	0.0181	APITD1/APITD1-CORT,ATRN,CRYZL1,DUSP1,E2F3,EIF2S1,ERO1A,FBXO9,HOXA1,ID4,MCUR1,PLEKHA8,SESN1,TIA1,VLDLR,WDR81
SAMSN1		other		-0.378	bias	0.0181	HBEGF,IFIT2,IFIT3,IFNG,NMI,RBL1,SOCS1
tunicamycin		chemical - endogenous non-mammalian		0.864		0.0182	DNAJB9,DNAJC3,EDEM1,ERO1A,MYC,RRS1,SESN2,SLC2A1,SNAI1,STAR,VEGFA
AG490		chemical - kinase inhibitor		0.765		0.0183	FOS,IFNG,MYC,STAR,TNFSF10,VEGFA
25-hydroxycholesterol		chemical reagent	Activated	2.236		0.0183	ACAT2,FCER1A,FOS,MAFF,VLDLR
MDM2		transcription regulator		1.109		0.0183	CCNA2,IGF1R,TFDP1,TNFSF10,TOP2A
Fcer1		complex		0.339	bias	0.0183	FYN,IFIT2,IFNG,IL10,SPHK1
MOG		other		-0.753	bias	0.0183	IFNG,IGF1,IL10,LEP,PECAM1
miR-758-5p (and other miRNAs w/seed GGUUGAC)		mature microrna	Activated	2.352	bias	0.0183	ANTXR2,ARID2,CALML4,CXCL12,FAM188A,FGF18,LGR4,LPGAT1,MAP4K4,MECR,PBRM1,RNF128,SLC11A2,STAMBP,TBC1D32,WNK4,ZNHIT6
miR-451b (miRNAs w/seed AGCAAGA)		mature microrna		-0.525	bias	0.0188	AAK1,ALDOB,ANKRD46,BNIP3,DNAJC15,DNAJC3,EDEM1,EHF,ENO2,ENSA,FAF2,FAM171B,GLUL,GPATCH4,LGR4,MAF,MRPS23,MS4A2,NEK2,PACSIN2,RHPN2,S100PBP,VEGFA,VGLL3,WLS,ZMAT3
miR-3058-5p (and other miRNAs w/seed CAGCCAC)		mature microrna		1.058	bias	0.0189	ATP2B2,CLDN2,CLN6,DNAJC3,EDEM1,EIF4G1,ENC1,ENO2,ENSA,EYA3,FADS6,FBXO41,GLDN,GRHL2,IGF1R,ITGA6,KCNE3,KCTD11,KIF1B,KLF1,LGR4,LRRC8C,LRTOMT,MAF,METAP1,MRPS33,MSL1,MSL3,NAA40,NASP,NAT9,NDUFA5,NOLC1,PCSK2,SRGAP1,SS18,STAR,TOR1AIP2,URM1,WIPI1,YLPM1,ZBTB7A,ZDHHC14
miR-3940-3p (miRNAs w/seed AGCCCGG)		mature microrna		0.651	bias	0.0189	ADAM19,ADM,ALKBH5,ARHGDIB,ATP2B2,CYGB,DPT,EXOSC2,FAF2,FCRL5,IKBKG,LFNG,LRRFIP1,LUZP1,NAT9,PACSIN2,PDE4DIP,PGF,PIP4K2A,RXRA,SLC27A1,TNFSF13,TRRAP
miR-1903 (and other miRNAs w/seed CUUCUUC)		mature microrna		-0.066	bias	0.0189	COL6A3,CP,DNAJC3,DTX4,DYNC2LI1,EHF,ENSA,FGF18,GCLM,GPATCH4,HBEGF,LGR4,MAF,MAP4K4,NCAPG,PTPRK,SAMD8,TCEA3,UBE2F
miR-3121-5p (miRNAs w/seed CCUUUGC)		mature microrna		0.462	bias	0.019	APITD1/APITD1-CORT,CD93,CELF2,CERCAM,CXCL13,CXCL14,DICER1,FBXW4,GSE1,HLCS,LPGAT1,MAF,NASP,PCSK2,PGM3,PLLP,POLR1D,PRELID2,SDCBP2,SMPD4,SORBS2,TEX2,TMEM86A,ZFYVE1
miR-1238-3p (miRNAs w/seed UUCCUCG)		mature microrna		1.234	bias	0.019	ACSL1,CXCL12,EMILIN1,HRG,ID4,MID1,MTAP,OAF,PACSIN2,PQLC2,ZFP1,ZNF674
EIF2AK2		kinase		1.964	bias	0.0191	FAS,FOS,IFNG,MYC
CD80		transmembrane receptor		-0.914		0.0191	FAS,IFNG,IGF1R,IL10
pimagedine		chemical drug		-1.067		0.0191	ALB,CAST,HBEGF,TNFSF10
NR0B1		ligand-dependent nuclear receptor				0.0191	CYP19A1,HSPA4L,LHB,STAR
ATF6		transcription regulator				0.0191	DNAJC3,FOS,RCAN1,VEGFA
miR-520g-3p (and other miRNAs w/seed CAAAGUG)		mature microrna		0.293	bias	0.0191	AAK1,AHCTF1,EBNA1BP2,EIF2S1,FLRT2,GLRX,MACF1,METTL21A,MTCH2,OSBPL10,PLEKHA8,RGS2,RRAGD,SPTLC2,VEGFA,VLDLR
SLC13A1		transporter		-0.378		0.0191	ACSL5,APOA4,EDEM1,GPAM,HNMT,IGF1,ITIH3
miR-1900 (and other miRNAs w/seed GCCGCCC)		mature microrna		0.309	bias	0.0194	CAMK2N2,CYGB,DNAJC21,EIF4G1,EMILIN1,FAF2,FAM57A,HNMT,HTRA3,IGF1R,INTS7,IRF6,LPCAT1,MEF2A,METTL21A,MSC,NAA40,NGB,NSFL1C,PQLC1,PRKCZ,STARD10,TMEM144,TMEM248,TP53RK,TPCN2,TSPAN17,VEGFA,ZDHHC14,ZFYVE1
isotretinoin		biologic drug		-0.765		0.0195	FASN,IFIT3,IFNG,IVL,SKP2,TNFSF10
TNFRSF1B		transmembrane receptor		-1.131		0.0195	CXCL12,CXCL13,FAS,IFNG,LEP,MYOD1
miR-4690-3p (and other miRNAs w/seed CAGCCCA)		mature microrna	Activated	4.003	bias	0.0195	ABI3,ADGRF2,ADM5,ALKBH5,ATAD2B,CAST,CEBPA,CNP,CRADD,CXCL12,DCP1A,DDIT4,DIO2,E2F3,ENC1,ENSA,ERO1A,FAM193B,FAM65B,FCGR1A,FCRL5,FLRT2,FLT1,GPAM,HOXA1,IKBKG,KIAA1644,LEP,LETM1,LFNG,LRRC20,MSC,MSL3,MYO19,NAA50,QSOX1,RET,RNF40,RPS19BP1,S1PR3,SMPD4,SRGAP1,TTC9,TTLL12,TYMS,WWP2,ZDHHC14,ZNHIT6
miR-122-5p (miRNAs w/seed GGAGUGU)		mature microrna		0.712	bias	0.0196	AAK1,ARSA,CACYBP,CBL,CDA,CLDN2,CLN6,DICER1,DLAT,FCRL5,GCLM,GRHL2,GYS1,HR,IGF1R,LUZP1,MID1,NAA50,NASP,NOCT,PAPOLA,PIP4K2A,PTHLH,SESN2,STAMBP,TNFSF10,VSTM4,ZER1
miR-1288-3p (miRNAs w/seed GGACUGC)		mature microrna	Activated	2.31	bias	0.0197	ADAR,CCDC3,CCT6A,CXCL14,DICER1,ENOPH1,ENPP1,FBXW4,FLRT2,FLT1,GGA2,HNMT,IDE,IGF1,INTS6,L3MBTL3,MTAP,NFIL3,NSFL1C,PSD3,SESN2,SPTLC2,TAC4,TMEM19,TOR1AIP2,TTLL12,USP37,WBP2,WDR33
fingolimod		chemical drug		1.387		0.0197	IFNG,IL10,PECAM1,S1PR3,SPHK1
glucagon		biologic drug		0.277		0.0197	ANK3,FOS,NR4A3,PHLDB2,TJP2
IL12A		cytokine		0.014		0.0197	FAS,IFNG,IL10,PECAM1,SOCS1
3-nitropropionic acid		chemical toxicant		-0.83		0.0197	ENO2,GAPDH,MYC,PENK,TAC1
ursolic acid		chemical drug				0.0197	EIF4EBP1,FASN,FOS,LEP,PECAM1
miR-3921 (and other miRNAs w/seed CUCUGAG)		mature microrna	Activated	2.527	bias	0.0198	ACSL1,CD2,CD93,CERCAM,DCP1A,FADS1,FAS,FBXO41,HEATR1,IGSF1,KHK,KIAA1551,LOC102724159/PWP2,LPGAT1,NCOA7,NOL6,NR2C1,PBRM1,PIPOX,RMI2,SAR1B,SHE,SPTLC2,STIM1,TJP2,TMEM144,VGLL3,VRK1,ZNF322,ZNF395
GATA2		transcription regulator		-0.029		0.0198	CCL21,CDH5,CEBPA,DMBT1,FCER1A,ITGA2,KDR,KLF1,MEF2C,MS4A2,MYC,NFIL3,PPP1R13L,RCAN1,SKP2
ZMPSTE24		peptidase				0.0201	IGF1,IGF1R,SOCS1
ZNF202		transcription regulator				0.0201	APOA4,VEGFA,ZFP36
TRAIP		enzyme				0.0201	CXCL13,IFNG,IL10
CRYAB		other				0.0201	IFNG,MYOD1,VEGFA
2-mercaptoacetate		chemical - endogenous non-mammalian				0.0201	IGF1,IL10,PLAU
miR-4764-5p (miRNAs w/seed GGAUGUG)		mature microrna		1.815	bias	0.0204	ASB13,BCLAF1,CCP110,CPT1C,CYP19A1,DUSP1,FADS1,FLRT2,GAS1,IGF1R,LEP,LRTOMT,PCSK2,PDE4DIP,PECAM1,PIGC,PIK3R2,POLR1D,POLR3A,RBL1,RET,TFDP1,TMEM86A,TSTD2,USP37,VSTM4
carbon tetrachloride		chemical toxicant		-1.214		0.0204	DUSP1,FGG,FOS,GADD45A,IFNG,IGF1,ITGA8,KDR,MYC,PECAM1,S1PR3,SPHK1
miR-544b (miRNAs w/seed CCUGAGG)		mature microrna		1.048	bias	0.0205	AK3,AKAP12,AMOT,CAST,CYTH2,FAM134A,GGA2,GRHL2,HRH1,INTS6,IVL,KIAA1644,LETM1,LPGAT1,LRRC20,LRTOMT,MED15,MS4A2,NAA40,NR1I2,PARP11,PECAM1,PGF,PLBD2,PLSCR1,PRELID2,PUS1,RAB32,RASSF1,RGS12,RUNDC3A,SHE,SLC27A1,SLCO2B1,TMEM201,TMEM248,TMEM86A,UBE2F,WIPF2,ZNF322
miR-3164 (and other miRNAs w/seed GUGACUU)		mature microrna	Activated	2.362	bias	0.0206	A1CF,CDS2,CLN6,COA7,CRYZL1,DIO2,FAIM,IFIT2,IGF1,ITGA6,ITGB8,KIF3A,LYRM4,MID1,NAA40,NANP,NPHS2,PLEKHA8,PPRC1,SRGAP1,TMEM248,ZER1
miR-4274 (miRNAs w/seed AGCAGUC)		mature microrna		0.217	bias	0.0206	AKAP12,ANXA5,AREL1,CCDC3,CXADR,EGLN1,EXO1,FAF2,HBEGF,HEATR1,HR,INTS6,LRRC8C,MAB21L3,MSL3,MXRA5,NDUFAF6,PALLD,PQLC1,TOR1A,TPP1,UBE2F,VEGFA
GNA12		enzyme		0		0.0207	CCNA2,FOS,GCLM,ITGA6,MYC,VEGFA
miR-3974 (miRNAs w/seed AAGGUCA)		mature microrna		0.957	bias	0.0209	AAK1,ANKRD44,BUB3,CACYBP,CELF2,CIDEA,CLK3,CXADR,GAS1,GPAM,HEATR1,HOXA1,HOXD8,INTS6,IRF6,LRRFIP1,PALLD,PIGP,POLR3A,RRM2B,SPRED1,SRSF11,STEAP4,VLDLR,WDR33
XDH		enzyme	Activated	2		0.021	CEBPA,DUSP1,PLAU,SLC2A1
glutamine		chemical - endogenous mammalian		-0.762		0.021	DUSP1,GADD45A,IFNG,VEGFA
chloroquine		chemical drug				0.021	IFNG,RCAN1,SOCS1,VRK1
hydroxyurea		chemical drug				0.021	GADD45A,HBB,MYC,NMI
E. coli B5 lipopolysaccharide		chemical - endogenous non-mammalian		0.271		0.021	BHLHE40,CCL24,CEBPA,CIDEA,CXCL13,DUSP1,FASN,FOS,GCLM,IFNG,IL10,MAT2A,SLC11A2,VEGFA
PAX6		transcription regulator		1.315		0.0211	ADPRHL2,F2,KIF1B,LPCAT1,MAF,MCUR1,PCSK1,PCSK2,SOCS1,STAR,VEGFA,WLS
miR-4707-5p (miRNAs w/seed CCCCGGC)		mature microrna		1.098	bias	0.0212	ARL4C,CD93,CDK5R1,CNP,CXCL13,CYTH2,DLX2,DPT,DTX4,FADS1,GAS7,GINS4,GNA11,GYS1,HILPDA,HTRA3,KIAA1551,KIAA1644,LGI4,LYRM4,MFSD6L,MID1,PHRF1,PPP6R2,PQLC1,PQLC2,RBFA,RGS12,SCAMP5,SLC27A1,TMEM201,TRAPPC13,TTC9,ZBTB7A,ZDHHC14
seocalcitol		chemical drug		1.446		0.0212	GADD45A,LRP1,PAPOLA,SKP2,VEGFA
IL1R1		transmembrane receptor		1.206		0.0212	CXCL12,FOS,IGF1,IL10,LEP
Ccl2		cytokine		-1		0.0212	IFNG,IGF1,IL10,KDR,LEP
MAVS		other		-1.387	bias	0.0212	IFIT2,IFIT3,IFITM3,IFNG,SOCS1
GPD1		enzyme				0.0212	APOA4,CAMK2N2,CXCL13,GADD45A,GPAT3,PFKFB3,VLDLR
miR-4728-3p (miRNAs w/seed AUGCUGA)		mature microrna	Activated	3.512	bias	0.0214	ADAMTS3,DPT,DRAM2,EMB,EXO1,FAM122A,ITGB8,KLF11,L3MBTL3,LRRFIP1,NCOA7,NDUFAF6,PEX12,RNLS,SAMD8,SLC11A2,SLC1A1,SMC4,SPRED1,SRSF6,TMEM19,VGLL3,ZFX,ZNHIT6
miR-938 (miRNAs w/seed GCCCUUA)		mature microrna		0.853	bias	0.0214	ADAR,ADM,CALML4,CBL,CCT6A,CRY2,CYP19A1,CYYR1,DBNDD1,HCFC2,HEATR1,HSPH1,KCTD11,KIAA1324,KIAA1644,METTL21A,PHLDB2,PITRM1,PLEKHA8,STAMBP,WDR33,WIPF2,WWP1,ZNF280D
miR-4668-3p (miRNAs w/seed AAAAUCC)		mature microrna		0.401	bias	0.0215	ADGRA3,CADM1,CDS2,DCP1A,DNMT1,EDEM1,FAM57A,IRF6,KIF1B,KLF11,NNT,PHACTR1,S100PBP,TARBP1,ZNF280D
L-cysteine		chemical - endogenous mammalian				0.0216	FOS,MYC
ISGF3		complex				0.0216	IFIT2,TNFSF10
BCG vaccine		biologic drug				0.0216	IFNG,IL10
SOX17		transcription regulator				0.0216	FOS,KDR
HRH3		g-protein coupled receptor				0.0216	IFNG,LEP
TSPYL5		other				0.0216	CAST,CYP19A1
isocoumarin NM-3		chemical drug				0.0216	PECAM1,VEGFA
TRIB1		kinase				0.0216	CEBPA,FASN
ACACA		enzyme				0.0216	FASN,GPAM
CD244		transmembrane receptor				0.0216	FOS,IFNG
CSK		kinase				0.0216	FOS,FYN
APCS		other				0.0216	IFNG,IL10
IAPP		other				0.0216	FOS,MYC
CCNT1		transcription regulator				0.0216	MYC,SLC2A1
WNT7B		other				0.0216	MYC,VEGFA
IL18R1		transmembrane receptor				0.0216	IFNG,IL10
PIM3		kinase				0.0216	IFNG,MYC
PAEP		other				0.0216	IFNG,VEGFA
IL18BP		other				0.0216	IFNG,VEGFA
RPS6KA3		kinase				0.0216	FOS,LEP
XCL1		cytokine				0.0216	IFNG,IL10
BHLHE41		transcription regulator				0.0216	MEF2C,MYOD1
VIPR2		g-protein coupled receptor				0.0216	IFNG,MAF
TAS1R3		g-protein coupled receptor				0.0216	CEBPA,SLC3A2
3,4,3',4'-tetrachlorobiphenyl		chemical toxicant				0.0216	CYP1A1,DNMT1
butylhydroxybutylnitrosamine		chemical toxicant				0.0216	CYP1A1,HBEGF
aristolochic acid I		chemical toxicant				0.0216	FOS,LEP
orlistat		chemical drug				0.0216	SKP2,VEGFA
piroxicam		chemical drug				0.0216	IFNG,IL10
sodium dodecyl sulfate		chemical drug				0.0216	IFNG,IVL
glimepiride		chemical drug				0.0216	LEP,SLC2A1
acetic acid		chemical - endogenous mammalian				0.0216	FOS,LEP
N-methyl-3,4-methylenedioxyamphetamine		chemical drug				0.0216	FOS,SLC6A3
apicidin		chemical - endogenous non-mammalian				0.0216	FAS,IFNG
tyrphostin AG 1024		chemical - kinase inhibitor				0.0216	CYP19A1,RBL1
gambogic acid		chemical - endogenous non-mammalian				0.0216	EGLN1,TYMS
miR-190a-5p (and other miRNAs w/seed GAUAUGU)		mature microrna		1.462	bias	0.0217	AAK1,CEBPA,CXADR,CYGB,DICER1,FAM122A,FLT1,IGF1,ISOC1,LPGAT1,MEF2A,METAP1,NFIA,NFIB,PTHLH,SLC26A3,SOCS4,ZFP1,ZNF280D,ZNF382
miR-1269a (and other miRNAs w/seed UGGACUG)		mature microrna	Activated	2.323	bias	0.0217	ADAR,AHCTF1,AQP11,ATAD2B,CBL,CYYR1,ENOPH1,ENPP1,FBXO9,FLT1,GAS1,HEATR5A,HN1,HNMT,HYAL1,INTS6,LETM1,LPGAT1,MCAT,NFIL3,POLR1D,SHE,SPTLC2,TMEM144,WLS
miR-4520-2-3p (miRNAs w/seed UUGGACA)		mature microrna		1.5	bias	0.0217	A1CF,ACSL5,ALDOB,ATP2B2,BNIP3,CCT6A,CDC23,CDH5,CRY2,GLRX,HRH1,KLF1,LGR4,MSL1,MSL3,NFIB,NFYC,NRCAM,PALLD,PLEKHA8,SOCS4,STAMBP,TJP2,TMX4,UBE2F
miR-154-3p (and other miRNAs w/seed AUCAUAC)		mature microrna		0.323	bias	0.0218	AKIP1,AMD1,BTG2,CXCL12,FUCA1,HNMT,IRF6,KIAA1324,NSMCE4A,PTPRR,ROCK2,SRSF11,TAC1,TOR1AIP2,WLS,ZNF280D
miR-4708-5p (miRNAs w/seed GAGAUGC)		mature microrna	Activated	3.105	bias	0.0219	ALB,BMPR1B,CADM1,CD3E,CXCL12,DNAJC3,FADS6,GLUL,HOXD8,IFIT3,IFNG,KIAA1644,MEF2C,PKIG,SHE,SLC11A2,SMPD4,TAC4,TCEB3,THOC2,TPP1,VASH1,WDR33,WIPF2
miR-4633-3p (and other miRNAs w/seed GGAGCUA)		mature microrna	Activated	2.568	bias	0.0219	ALDOB,AMER3,AQP11,CD247,COA7,CRY2,CYTH2,DIO2,EIF2S1,FADS1,FAM155B,FBXO7,FBXW4,GPATCH4,GRHL2,HOXD8,KIF3A,LUZP1,MAP4K4,PKIG,R3HDM4,SCAMP5,SLC37A4,SRSF6
lithium chloride		chemical drug		-0.277		0.022	FOS,IL10,MYC,MYOD1,SNAI1,TNFSF10
IRF3		transcription regulator		-1.609		0.0223	FAM26F,FCGR1A,IFI16,IFIT2,IFIT3,IFITM3,IFNG,IL10,TPST1
miR-549a (miRNAs w/seed GACAACU)		mature microrna		0.12	bias	0.0223	ADGRA3,AMER3,DDX42,EDEM1,FAM107B,FLT1,FUCA1,GAS7,GLUL,HSPA4,LPGAT1,NR4A3,PATL1,PCSK2,PLLP,SDCBP2,SMC4,TPCN2,WLS,ZFP1,ZNF280D
miR-4701-5p (and other miRNAs w/seed UGGCCAC)		mature microrna	Activated	2.295	bias	0.0223	AKAP12,ARL4C,ARSA,ATAD2B,CCNA2,COA7,CYYR1,DTX3L,FAM57A,FAM65B,GAS1,GPAT3,GRHL2,HDAC4,HILPDA,IDE,IGF1R,IL10,KDR,KIF1B,LAMC2,LEP,NANP,NOTCH4,PGM3,PIK3R2,RBL1,RCAN3,RUNDC3A,SLC11A2,SLC19A2,SMPD4,SPTLC2,SRSF6,TBC1D8,TCF19,TMX4,TSHZ2,USP37,XPO7,ZDHHC14,ZFYVE1,ZNF395
APC		enzyme				0.0224	CXCL12,IGF1,IL10,MYC,PRKCZ,SNAI1,VEGFA
miR-1205 (miRNAs w/seed CUGCAGG)		mature microrna		1.184	bias	0.0224	AAK1,ALKBH5,ANTXR2,BCLAF1,BMPR1B,CAPG,CCDC3,CD247,CDS2,COMMD9,CRY2,DICER1,DLX2,DNAJC3,DPT,DROSHA,FAM65B,GPAM,GYS1,HOXA1,HTRA3,LFNG,LRRC20,LRRFIP1,MACF1,MAP10,MAP3K9,MTCH2,MTF2,NAT9,NGB,OSBPL8,PECAM1,PGF,PLOD1,PPP1R3B,PRSS12,RBFA,SLC11A2,TCEB3,WLS
miR-3200-3p (miRNAs w/seed ACCUUGC)		mature microrna		1.691	bias	0.0224	ALKBH5,ANKRD10,BTG2,CP,FCRL5,FLRT2,FLT1,GPAT3,INTS6,KDR,MTSS1,MYO19,NAA50,PARP11,SCARA5,SIMC1,SMC4,SOCS6,TCEB3
Ifn		group		0.973		0.0227	FAS,FOS,IFI16,IFITM3,IL10,PECAM1,SOCS1,STAR
CYP1B1		enzyme		0.391		0.0228	CD3E,MID1,SKP2,TNFSF10,VLDLR
pyridaben		chemical toxicant		-0.555		0.0228	CCL21,ITGB8,KIF1B,LAMC2,NFIB
NTRK2		kinase		-1.982	bias	0.0228	CCNA2,FOS,MYC,TNFSF10,VEGFA
MAP2K7		kinase				0.0228	FAS,IVL,MYC,PLAU,PPP1R7
CLEC11A		growth factor				0.0228	CXCL12,FOS,SLPI,STAR,TAC1
dextran sulfate		chemical drug		-0.753		0.0228	CCNA2,EXO1,IFITM3,IFNG,IGF1R,IL10,KCTD11,MYC,NEK2,PECAM1,PGF,TOP2A,VEGFA
miR-4693-3p (miRNAs w/seed GAGAGUG)		mature microrna		1.685	bias	0.0228	AAK1,ABHD6,ASB13,DBNDD1,DPT,EIF4G1,ENPP1,FBXO9,GPR39,HNMT,KDR,MECR,NFIA,PARP9,PCSK1,PTP4A2,PYGM,RAMP2,SPTLC2,TRIP6,UBE2F,WBP2,WDR26
S-nitroso-N-acetyl-DL-penicillamine		chemical reagent				0.0229	BNIP3,IFNG,MYC
CaMKII		complex				0.0229	FOS,IL10,PRKCZ
DLL1		enzyme				0.0229	IFNG,IL10,LFNG
LRP6		transmembrane receptor				0.0229	FOS,PNPLA3,ROCK2
SUMO1		enzyme				0.0229	ABCB11,ALB,HBB
NTF3		growth factor				0.0229	FOS,PENK,TAC1
VAV1		transcription regulator				0.0229	FOS,IFNG,VEGFA
MAP2K5		kinase				0.0229	FOS,MEF2A,NR4A3
MSX1		transcription regulator				0.0229	MYF6,MYOD1,SYCP3
ACKR2		g-protein coupled receptor	Activated	2	bias	0.023	ADAR,IFI16,IFIT2,IFIT3
mir-27		microrna		0.647		0.023	CDH5,IGF1,IL10,SOCS6
BAPTA-AM		chemical reagent		-0.152		0.023	FLT1,FOS,S100B,SOCS1
Laminin		complex				0.023	CDK5R1,ITGA6,PLAU,SKP2
miR-3143 (miRNAs w/seed UAACAUU)		mature microrna		1.645	bias	0.023	A1CF,ADAMTS3,BHLHE40,CADM2,ISOC1,KCTD8,KIF1B,LTN1,MSL3,OSBPL8,PARP11,RBL1,TOP2A,WLS,ZMAT3,ZNF382
miR-3074-5p (miRNAs w/seed UUCCUGC)		mature microrna		1.239	bias	0.0231	ACSBG1,ANK3,ANTXR2,ATRN,CAST,CXCL12,CYYR1,EIF2S1,EYA3,FAM122A,GADD45A,HEATR5A,INTS6,KATNAL1,MAB21L3,NEK2,NFIA,NR4A3,PARP11,PCSK1,PIP4K2A,PSD3,RCAN3,RGS2,TMEM248,TMEM86A,TMX4,TNFSF10,TXNDC15,VASH1
miR-3141 (miRNAs w/seed AGGGCGG)		mature microrna		-0.106	bias	0.0232	ANPEP,ARL4C,ATP2B2,CDK5R1,CEBPA,CNP,COL6A1,EIF4EBP1,ENOPH1,HOXD8,HR,METTL21A,NGB,PCSK2,SDCBP2,SLC25A22,SMOX,SOCS1,TCAP,TCF19,TCF21,TNFSF13,TSPAN9,ZDHHC14
miR-3655 (miRNAs w/seed CUUGUCG)		mature microrna		-0.728	bias	0.0233	ANKRD10,CACYBP,COMMD9,KLF1,VSTM4,WDR33
KIT		transmembrane receptor				0.0233	FCER1A,IFNG,IL10,MYC,RAB32,SOCS1
VIP		other		0.332		0.0235	FOS,IGF1,IL10,KLRC4-KLRK1/KLRK1,MYC,STAR,TRH
SLC25A13		transporter				0.0235	APOA4,CAMK2N2,CXCL13,GADD45A,GPAT3,PFKFB3,VLDLR
miR-4520-5p (miRNAs w/seed CUGCGUG)		mature microrna	Activated	2.566	bias	0.0236	CELF2,COMMD9,FLRT2,FPGT,HN1,HOXD8,IGF1,LEP,LGI4,LRRFIP1,MYF6,PIP4K2A,R3HDM4,TCF21,VGLL3,VSTM4
miR-3691-3p (miRNAs w/seed CCAAGUC)		mature microrna		1.834	bias	0.0237	ACSL5,BNIP3,BUB3,CADM1,CAST,DLX2,DNAJC15,EHF,EMB,FAM171B,FASN,HCFC2,HTR1D,MEF2C,MXRA5,NDUFA5,NR4A3,ODF2L,PBRM1,PQLC1,S1PR3,SCAMP3,SESN1,TNFSF10,TOR1AIP2,TSPAN9
miR-3585-5p (and other miRNAs w/seed UCACAAG)		mature microrna		1.855	bias	0.0238	AAK1,AMD1,ATP1B3,CXADR,DESI2,DNAJC7,EGLN1,EIF2S1,EML4,FAM57A,GLYR1,ISOC1,KIAA1551,MOAP1,PEG3,PTPRK,S100PBP,SNRPF,SPTLC2,TBC1D32,TMEM39A,TMX4,TP53RK
miR-4444 (miRNAs w/seed UCGAGUU)		mature microrna		1.211	bias	0.024	COL6A3,ENC1,FAM134A,FBXO41,HNMT,ITGB8,MTSS1,PPIG,SOCS4,ZFX
miR-210-5p (and other miRNAs w/seed GCCACUG)		mature microrna	Activated	2.494	bias	0.024	ABHD6,AIFM2,ARL4A,ATAD2B,CALML4,CCT6A,CD247,CEP44,CYFIP2,CYP19A1,DTX3L,ENPP1,FADS1,FAS,FCRL5,GGA2,HRH1,IDE,KCNE3,LETM1,LFNG,LRRFIP1,LRTOMT,MRPS33,NAA40,NEK2,NOCT,NOL6,NSD1,NSFL1C,PGF,PHF12,PNPLA3,RHPN2,RXRA,SLC1A1,SLC37A4,SMPD4,SRSF6,STAMBP,TIA1,TSTD2,UBE2F,WIPF2,ZFYVE1,ZNHIT6
miR-1908-5p (and other miRNAs w/seed GGCGGGG)		mature microrna	Activated	2.028	bias	0.024	ADAR,AK3,ANPEP,ARL4C,ASB13,CAMK2N2,CCT6A,CDK5R1,CEBPA,CYTH2,DBNDD1,DENND4B,DLX2,ENPP1,FASN,FLT1,GAS1,GAS7,GYS1,HR,HTRA3,IFI35,LPCAT1,LRP1,MAF,MCAT,MED15,MXD4,MYOD1,NFIA,NGB,NSD1,PACSIN2,PHRF1,PIK3C2B,S100B,SLC25A22,SOCS6,SRGAP1,STARD8,TCEB3,TNFSF10,TSPAN9,VASH1,VSTM4,WBP2,WWP2,ZBTB7A
ERG		transcription regulator		0.707	bias	0.0242	CCNA2,FLT1,FYN,IKBKG,ITGA6,NFIL3,NRCAM,PECAM1,PLAU,RASSF1,ROCK2
NR1I2	-3.65	ligand-dependent nuclear receptor		-0.6		0.0242	CEBPA,CYP1A1,ENTPD5,FASN,GLUL,IGF1,LPCAT3,NR1I2,PIPOX
miR-28-3p (and other miRNAs w/seed ACUAGAU)		mature microrna		1.441	bias	0.0242	AHCTF1,AK3,ANKRD46,CEP44,FAF2,FAM122A,FAS,GCLM,HELLS,PAPOLA,PLSCR1,POLR1D,RRS1,SLC26A3
miR-4256 (miRNAs w/seed UCUGACC)		mature microrna		1.217	bias	0.0243	AAK1,ABCB11,BBIP1,CCP110,CRNKL1,CYYR1,DESI2,DNAJC3,DPT,FLRT2,HBEGF,HRH1,KDR,MAN1A1,METAP1,NR2C1,NR2F2,PNPLA3,RNF40,RRM2B,SAMD8,SLC11A2,SMPD4,SS18,STIM1,TMX4,WDR26
DDIT3		transcription regulator		0.365		0.0244	CEBPA,ERO1A,IFNG,IVL,MYCBP
NR4A2		ligand-dependent nuclear receptor		-1.325		0.0244	ADM,COL6A1,IL10,RET,SLC6A3
miR-881-3p (and other miRNAs w/seed ACUGUGU)		mature microrna		1.89	bias	0.0246	AKAP12,AMOT,CALML4,CBL,CD93,CERCAM,CLDN2,DTX3L,EHF,EIF2S1,HNMT,INHA,INTS6,INTS7,ITGA6,PTPRG,RET,RHPN2,SF3B1,TAC4,TMEM144,TMEM39A,TRAPPC13,VRK1,WDR26,ZFX
FGFR1		kinase		0.555		0.0247	EIF4EBP1,EIF4G1,FOS,MYC,PCSK1,PLAU
miR-4682 (miRNAs w/seed CUGAGUU)		mature microrna		0.287	bias	0.0249	DMBT1,DTX3L,FPGT,HRG,IL10,ITGA2,ITGA6,LPGAT1,LTN1,NRCAM,PARP9,PBRM1,PEG3,PGM3,PITRM1,PLEKHA8,PTHLH,STAMBP,TMEM39A,VGLL3,WDR26,ZER1
miR-3613-5p (miRNAs w/seed GUUGUAC)		mature microrna		1.836	bias	0.0249	ABHD17C,CADM2,GPAM,HEATR5A,KIF3A,LYRM4,MAN1A1,MAP10,MEF2C,NFIB,PATL1,RRAGC,SHE,THOC2
PRKACA		kinase				0.0251	DIO2,IGF1,LEP,PENK
2-amino-5-phosphonovaleric acid		chemical - other		-0.97		0.0252	ADAM19,ANKRD37,DUSP1,FOS,GADD45A,HDAC4,KDR,NR4A3,RGS2
miR-3614-3p (miRNAs w/seed AGCCUUC)		mature microrna		1.818	bias	0.0253	ANKRD46,ARL4A,ATP2B2,CALML4,CCP110,ENSA,GSE1,IDE,IGF1,MAF,MAP10,MS4A2,NFIB,NFIL3,PKIG,PLEKHA8,PSD3,PTP4A2,PTPRG,RRM2B,SOCS6,VRK1,WDR26,ZNF280D,ZNF322
miR-3178 (miRNAs w/seed GGGCGCG)		mature microrna		0.737	bias	0.0256	AKIP1,ARL4C,CD3E,CDC42EP5,CYGB,DTX3L,EMILIN1,FAM134A,GAS1,HDAC4,HLCS,HOXD3,LETM1,MOAP1,MRI1,MSC,MYOD1,NEK2,NSD1,OSBPL10,TMEM201,TTC9,WBP2,ZFX
miR-4303 (miRNAs w/seed UCUGAGC)		mature microrna		1.869	bias	0.0256	ANKRD10,ARID2,BNC1,COMMD9,CSTF1,DBNDD1,EMB,EML4,ENOPH1,FLT1,KDR,KHK,LPGAT1,LRRC20,LRRFIP1,PLBD2,RASSF1,RBM25,RCAN1,RNF128,SIMC1,SPTLC2,STAMBP,TMX4,TOR1A,ZNF322,ZNF395
miR-607 (miRNAs w/seed UUCAAAU)		mature microrna		1.394	bias	0.0258	CXCL14,DNAJC3,IFI16,IGF1,MAMDC2,NDUFA5,PLSCR1,SLC38A9,SPRED1,VRK1
miR-1284 (and other miRNAs w/seed CUAUACA)		mature microrna		1.088	bias	0.0259	AMOT,ATP2B2,FAIM,GAS1,GPAT3,ID4,IGF1,KATNAL1,MEF2C,MYCBP,NASP,NNT,PSD3,SLC19A2,SNAI1,SRGAP1,TOR1AIP2,UBE2F,ZNF280D,ZNF674
tacrolimus		chemical drug		0.761		0.0259	CEBPA,CXADR,ENC1,FOS,HELLS,IFNG,IL10,KLRC4-KLRK1/KLRK1,MAF,MYC,TNFSF10
risperidone		chemical drug				0.0259	FOS,IL10,NR4A3
Fibrin		complex				0.0259	CDH5,KDR,PLAU
choline fenofibrate		chemical drug				0.0259	ACSL1,CXCL12,NPC2
CTSS		peptidase				0.0259	FAS,IFNG,TNFSF10
CD274		enzyme				0.0259	IFNG,IL10,TNFSF10
FBXW7		transcription regulator				0.0259	GPAM,MYC,NOTCH4
MBP		other				0.0259	IFNG,IL10,MYC
diazoxide		chemical drug				0.0259	FASN,LEP,MYC
dithiothreitol		chemical reagent				0.0259	GADD45A,MYC,VEGFA
SB 216763		chemical toxicant				0.0259	FASN,MYC,TNFSF10
epicatechin gallate		chemical drug				0.0259	MGMT,VEGFA,ZMAT3
homocysteine		chemical - endogenous mammalian		-0.541		0.0262	CXCL12,GADD45A,LEP,NPHS2,PGF,VEGFA
lithium		chemical drug		-1.671		0.0262	ANK3,FAS,FOS,OXT,RET,TAC1
let-7		microrna		0.197	bias	0.0262	BTG2,IGF1R,IL10,MYC,ZFP36
EFNA2		kinase		-1		0.0262	CD247,FCER1A,NFIL3,PTHLH,WWP1
GNRH1		other		-1.049		0.0262	CYP19A1,FOS,IGF1,INHA,LHB
SOX9		transcription regulator		-1.4		0.0262	DMBT1,FOS,GAS7,VEGFA,WWP2
miR-4536-3p (miRNAs w/seed CGUGCAU)		mature microrna		0.097	bias	0.0265	ATRN,DIO2,IGF1,LUZP1,NFIA,NPHS2,NR4A3,PFKP,SLC2A3,SPTLC2,TMEM248,TOB1,WDR33
miR-2114-5p (miRNAs w/seed AGUCCCU)		mature microrna	Activated	2.859	bias	0.0265	ADAM19,ADAMTS3,ADAR,AIFM2,CAMK2N2,CEP44,CXADR,FGF18,GLUL,HLCS,IRF6,IVL,LUZP1,MEF2C,NFIA,NIP7,NR2C1,OAZ2,PGM3,PRSS12,RCAN3,RNLS,S1PR5,SH2B2,SNAI1,TOB1,YLPM1
miR-197-3p (and other miRNAs w/seed UCACCAC)		mature microrna	Activated	2.322	bias	0.0268	ABHD17C,AHCTF1,ANK3,CBL,CCT6A,CNP,DIO2,DKC1,ENPP1,EYA3,FBXO41,GGA2,HOXD8,INIP,ITGB8,LETM1,MAP4K4,MECR,MEF2A,NAA40,PLEKHA8,PLLP,RXRA,SERPINB11,SS18,STAR,TMEM19,TOR1AIP2,UBE2F,WDR33,ZNF322
miR-668-3p (and other miRNAs w/seed GUCACUC)		mature microrna		0.158	bias	0.027	ABHD5,CXCL12,FLT1,HTR1D,ID4,IGF1,ITGA6,MECR,MXRA5,OSBPL10,PCSK2,PITRM1,PLOD1,POLR1D,RXRA,S100PBP,TBC1D8,USP37,VSTM4,ZFP1,ZNF280D
salmonella minnesota R595 lipopolysaccharides		chemical - endogenous non-mammalian		-0.457	bias	0.0271	ACSL1,AK3,CXCL13,FOS,IFIT2,IFNG,IL10,MAFF
mibolerone		chemical drug		-1.414		0.0271	ACSL1,AMD1,COL6A3,EIF2S1,IGF1,MAT2A,SARAF,TOP2A
miR-517a-3p (and other miRNAs w/seed UCGUGCA)		mature microrna		1.221	bias	0.0272	ATRN,CDS2,HYAL1,IGF1,LUZP1,MCUR1,NANP,NFIA,NFIB,NPHS2,SF3B1,TBC1D8
kainic acid		chemical toxicant		1.477		0.0272	BTG2,DUSP1,FOS,HBEGF,KDR,NFIL3,PENK,RET,VEGFA
11-dehydrocorticosterone		chemical - endogenous mammalian				0.0273	FASN,GPAM
Pde		group				0.0273	FOS,NR4A3
PI3Kγ		group				0.0273	IFNG,IL10
IRF3 dimer		complex				0.0273	IFIT2,IL10
SASH3		other				0.0273	IFNG,IL10
MTORC2		complex				0.0273	IFIT2,IFNG
PRRX1		transcription regulator				0.0273	FOS,PALLD
immune complex		complex				0.0273	IFNG,SOCS1
CARTPT		other				0.0273	FOS,TRH
HIF1AN		enzyme				0.0273	CA9,SLC2A1
LHX3		transcription regulator				0.0273	LHB,POU1F1
FOXN1		transcription regulator				0.0273	FAM57A,IVL
CD53		other				0.0273	MRPL32,TFDP1
GPNMB		enzyme				0.0273	FOS,TAC1
MIR101		group				0.0273	CDH5,DUSP1
APBB1		transcription regulator				0.0273	TYMS,VLDLR
GHRHR	-6.7	g-protein coupled receptor				0.0273	FOS,GHRHR
MAPKAP1		other				0.0273	IFI16,IFIT2
MYDGF		cytokine				0.0273	IL10,MAF
SART1		other				0.0273	CA9,DDIT4
MGAT3		enzyme				0.0273	ITGA2,SNAI1
Ighg2b		other				0.0273	IFNG,IL10
KIF3A	-1.55	enzyme				0.0273	MYC,VEGFA
ETV6		transcription regulator				0.0273	CDH5,VEGFA
ZBTB32		transcription regulator				0.0273	IFNG,IL10
PHB		transcription regulator				0.0273	CYP19A1,IFNG
FZR1		kinase				0.0273	PFKFB3,SKP2
SRD5A1		enzyme				0.0273	CLDN2,CYP19A1
PARP2		enzyme				0.0273	FASN,LEP
RALA		enzyme				0.0273	PLAU,SNAI1
PEA15		transporter				0.0273	LHB,PRKCZ
HNRNPU		transporter				0.0273	GAPDH,MYOD1
PTGER3		g-protein coupled receptor				0.0273	IL10,LEP
DBH		enzyme				0.0273	FOS,IFNG
LOC102724428/SIK1		kinase				0.0273	FASN,STAR
nedocromil sodium		chemical drug				0.0273	IFNG,IL10
putrescine		chemical - endogenous mammalian				0.0273	FOS,MAT2A
finasteride		chemical drug				0.0273	FOS,PENK
PRKAA1		kinase		1.941		0.0273	ALB,ARHGDIB,CXCL12,IFNG,NFIB,PCOLCE,STAR
vorinostat		chemical drug		-0.014		0.0273	CLDN2,CYP1A1,DUSP1,IFNG,IL10,MYC,SOCS1
POU2F1		transcription regulator				0.0273	ACSL1,CYP1A1,DDIT4,DECR1,GADD45A,GCLM,SESN2
bicuculline		chemical - endogenous non-mammalian		1.996		0.0273	BTG2,DUSP1,FOS,MAFF
RASSF1	1.72	other		1.067		0.0273	BHLHE40,CCNA2,FOS,HBEGF
mir-133		microrna		0	bias	0.0273	DNMT1,IGF1R,NELFA,TNFSF10
miR-300-5p (and other miRNAs w/seed UGAAGAG)		mature microrna		0.772	bias	0.0276	ARHGDIB,CSRP2,DESI2,DNAJC21,DPT,DUSP1,EML4,ENC1,GCLM,GINS4,HEATR5A,ID4,KIAA1324,KIF3A,MAMDC2,MYCBP,NUP54,SLC6A3,WAS,WDR33,ZFP1
miR-198 (miRNAs w/seed GUCCAGA)		mature microrna		1.114	bias	0.0276	AAK1,ADAM19,BUB3,CP,CWC22,DTX3L,ENC1,ERO1A,GPSM2,HDAC4,HOXA1,INIP,KIF3A,KLF11,LAMC2,LGI4,MAB21L3,NFIB,PAPOLA,PDE4DIP,PFKFB3,PHF12,PLAU,RGS12,SLC13A4,SLC2A1,SRGAP1,STAR,TCF21,TJP2,WDR33
TNFSF10	-3.22	cytokine		-0.685		0.0277	FOS,IFI16,IFNG,IGF1R,RCAN1,TNFSF10
SOX3		transcription regulator		-0.816	bias	0.0277	DUSP1,PECAM1,PEG3,RET,VEGFA,WLS
SGK1		kinase		1.067	bias	0.028	HBEGF,SLC1A1,SLC2A3,SLC3A2,STIM1
miR-4302 (miRNAs w/seed CAGUGUG)		mature microrna		1.922	bias	0.028	ANK3,CAST,CDH5,CDS2,CSRP2,DLAT,FAM155B,GAPDH,GPATCH4,GPR39,HN1,HOXA1,IGF1,MED15,OSBPL8,PNMA1,PPP1R3B,RUNDC3A,SLC1A1,STBD1,TAC4,TJP2,TNFSF10,TOR1AIP2,TRIM3,TSHZ2,TSPAN9
Tgf beta		group		0.394		0.0281	BHLHE40,DLX2,FOS,IFNG,IGF1,IL10,MAF,MYC,PLAU,PTHLH,SNAI1,VEGFA
miR-3117-5p (miRNAs w/seed GACACUA)		mature microrna		0.829	bias	0.0281	AQP11,CADM2,CYP19A1,GPAT3,LETM1,LPAR6,MEF2C,NDUFA5,ODF2L,PEG3,RBFA,RHPN2,SLC38A9,TOR1AIP2,VSTM4,WDR33,ZNF322
miR-941 (miRNAs w/seed ACCCGGC)		mature microrna		1.825	bias	0.0282	CLEC14A,CXCL12,FAAP24,GINS4,HEATR5A,LAMC2,LEP,LFNG,MRI1,MRPS23,MSC,NSD1,PIPOX,PQLC2,RBL1,RET,SLC2A1,SMC4,SMIM11A,TSPAN17,VSTM4
miR-188-5p (and other miRNAs w/seed AUCCCUU)		mature microrna		1.947	bias	0.0282	AAK1,BUB3,CCNA2,CWC22,CYYR1,DNAJC21,EDEM1,FBXO9,HNMT,MOAP1,NR4A3,PEX3,PRSS12,RASA1,SERPINB11,SLC25A20,SOCS4,SPRED1,STEAP4,TMEM39A
IKBKG	-1.56	kinase		-0.187		0.0283	CP,CXCL12,FOS,IFI16,NOCT,RCAN1,TNFSF10,VEGFA
pioglitazone		chemical drug		1.942		0.0283	APOA4,CYP19A1,FOS,IFNG,LEP,NR4A3,SLC27A1,SLC2A1,VLDLR
miR-1273h-5p (and other miRNAs w/seed UGGGAGG)		mature microrna	Activated	3.432	bias	0.0285	AAK1,AKIP1,ALOX15,AMER3,ARID2,BBIP1,CAST,CNP,CYFIP2,CYTH2,DBNDD1,DROSHA,DTX4,EGLN1,ENPP1,ERO1A,EYA3,FAM134A,FAM155B,FAM162B,FASN,FBXL20,FLT1,GGA2,GLDN,KATNAL1,KIAA1324,KIAA1644,KLF1,LETM1,LFNG,LHB,LPCAT3,LRPPRC,LRTOMT,LYRM4,MAT2A,MID1,MXRA5,MYOD1,NAA50,NASP,NEK2,NIP7,NR4A3,PARP9,PIK3C2B,PLEKHA8,QPCTL,RHPN2,SAR1B,SHE,SLC11A2,SRGAP1,TNFSF10,TTC9,TXNDC15,WBP2,ZFYVE1,ZNF674,ZNHIT6
PPARD		ligand-dependent nuclear receptor		1.803		0.0286	APOA4,FASN,GPAM,IFNG,IL10,SLC25A20,SLC27A1,STBD1,TCEA3,VEGFA,VLDLR
miR-147a (miRNAs w/seed UGUGUGG)		mature microrna	Activated	2.783	bias	0.0287	ABHD6,ACSL5,ANK3,CALML4,CYYR1,DLAT,DTX3L,FCRL5,ISOC1,KIF1B,MAF,MEF2A,MS4A2,NFIA,PCP4L1,PHACTR1,PTPRK,S1PR3,SLC25A22,SPTLC2,TMEM19,TP53RK,VEGFA,VGLL3
NKX2-1		transcription regulator				0.0287	CEBPA,CYGB,DIO2,ENC1,GRHL2,HELLS,PGM3,QSOX1,SNAI1,VEGFA
miR-3064-3p (miRNAs w/seed UGCCACA)		mature microrna		1.036	bias	0.0288	ADPRHL2,ANTXR2,B3GALNT1,BTG2,CAST,CCNA2,CD93,CELF2,CYP19A1,CYTH2,DYNC2LI1,E2F3,FAM65B,HDAC4,HEATR1,HEATR5A,LUZP1,MAF,MAP4K4,MAT2B,MID1,MYCBP,NFIB,NNT,NSFL1C,OAF,ODF2L,PCSK1,PHF12,PPP1R3B,RAB32,RET,RRAGD,SLC19A2,SLC25A20,SRSF11,TEX2,TMEM201,WDR33,WLS
miR-509-3p (miRNAs w/seed GAUUGGU)		mature microrna		0.034	bias	0.0288	ALDOB,AMOT,DRAM2,DYNC2LI1,EMB,FCRL5,FYN,IGSF1,INTS10,MAT2A,PATL1,PEG3,PLOD1,STBD1,WLS,ZCCHC10,ZMAT3
Calcineurin A		group				0.0292	FGF18,FOS,SLC2A1
Pka catalytic subunit		group				0.0292	INHA,PENK,STAR
TNFRSF4		transmembrane receptor				0.0292	IFNG,IL10,SOCS1
ALDH2		enzyme				0.0292	GCLM,GSS,SLC3A2
mir-150		microrna				0.0292	DKC1,IFNG,SOCS1
HSD17B4		enzyme				0.0292	ACSL1,FASN,LPCAT3
TAF4B		transcription regulator				0.0292	INHA,ITGA6,RET
HSPD1		enzyme				0.0292	IFNG,IGF1R,IL10
FGF9		growth factor				0.0292	PECAM1,STAR,VEGFA
RC3H1		enzyme				0.0292	CCL24,CXCL13,IFNG
paroxetine		chemical drug				0.0292	ADM,ANKRD37,BNIP3
alpha-tocopherol		chemical drug				0.0292	ALB,IFNG,LEP
ceramide		chemical - endogenous mammalian				0.0292	FOS,GAPDH,MYC
GSK3B		kinase		-0.409		0.0292	FOS,IFNG,IL10,KIF3A,MYC,SNAI1
PRDM5		transcription regulator				0.0292	ACSBG1,CLK3,E2F3,ENO2,MYC,NCOA7
miR-3667-5p (miRNAs w/seed AAGACCC)		mature microrna	Activated	2.93	bias	0.0292	AAK1,ASB13,BUB3,CBL,COA7,DBNDD1,DDX42,EDEM1,FCRL5,FPGT,HOXA1,IGF1R,LFNG,LRRFIP1,MTCH2,MYCBP,NOLC1,PACSIN2,PNMA1,PTPRK,RNF40,SLC35F2,TMX4,ZNF382
miR-628 (and other miRNAs w/seed UGCUGAC)		mature microrna	Activated	3.541	bias	0.0295	A1CF,ANK3,AREL1,ATRN,CAST,CCT6A,CEP44,CXCL14,DLAT,E2F3,FUCA1,GLYR1,GPATCH4,HNMT,MAN1A1,MTCH2,SLC11A2,SLC6A3,SOCS6,SPRED1,TCF21,TMEM248,TPCN2,TRAPPC13,TSTD2,ZMAT3
miR-4462 (miRNAs w/seed GACACGG)		mature microrna		-0.416	bias	0.0295	ADAR,GAS7,GINS4,HDAC4,INTS6,KIAA1644,MAP3K9,MED15,MXD4,PHLDA2,RCAN1,RUNDC3A,SLC16A3,SLC6A3,TP53RK,TSPAN9,WIPF2
IL1RN		cytokine		0.695		0.0295	IFIT3,IFNG,IGF1,IL10,TAC1,TNFSF10,VEGFA,YLPM1
CpG oligonucleotide		chemical drug		-0.127		0.0295	CA9,DICER1,IFNG,IL10,MYC,TNFRSF17,TNFSF10,TNFSF13
UDP-N-acetylglucosamine		chemical - endogenous mammalian				0.0295	LEP
6-thioguanylic acid		chemical reagent				0.0295	PTHLH
PD158780		chemical - kinase inhibitor				0.0295	HBEGF
PS-K		chemical drug				0.0295	IFNG
teniposide		chemical drug				0.0295	FAS
ERMN		other				0.0295	CNP
beryllium sulfate		chemical toxicant				0.0295	IFNG
charybdotoxin		chemical - endogenous non-mammalian				0.0295	IFNG
peptide YY 3-36		biologic drug				0.0295	FOS
FD & C Yellow no. 6		chemical toxicant				0.0295	CD3E
SHP		group				0.0295	DNMT1
G protein alpha		group				0.0295	FOS
Cofilin		group				0.0295	MYC
Arf		group				0.0295	DROSHA
growth factor receptor		group				0.0295	FOS
FAM26F	2.54	other				0.0295	IFNG
Ahr-aryl hydrocarbon-RelA		complex				0.0295	MYC
IL12R		group				0.0295	IFNG
ZM 323881		chemical - kinase inhibitor				0.0295	RCAN1
GSK 189254		chemical drug				0.0295	FOS
pridopidine		chemical drug				0.0295	FOS
SGSM1		other				0.0295	SLC6A3
PGLYRP3		transmembrane receptor				0.0295	IFNG
IL17RC		transmembrane receptor				0.0295	STEAP4
ZNF496		transcription regulator				0.0295	HBB
SNURF		other				0.0295	LHB
CD3-TCR		complex				0.0295	TOB1
SRF-ELK1		complex				0.0295	FOS
SLC39A14		transporter				0.0295	IGF1
KY		other				0.0295	IFNG
MARCH6		enzyme				0.0295	DIO2
Tmevpg1		other				0.0295	IFNG
UBN1		transcription regulator				0.0295	CCNA2
MEMO1		other				0.0295	SNAI1
PGLYRP4		transmembrane receptor				0.0295	IFNG
exendin(9-39) amide		biologic drug				0.0295	FOS
ALX1		transcription regulator				0.0295	SNAI1
CYTL1		cytokine				0.0295	IGF1
PGLYRP1		transmembrane receptor				0.0295	IFNG
Klre1		transmembrane receptor				0.0295	IFNG
USP36		peptidase				0.0295	MYC
TPH2		enzyme				0.0295	IGF1
[truncated: 463 more rows]
